# Supplementary material for: Direct synthesis of C3-alkynyl pyrroloindolines from tryptamines via a visible-light-induced radical cascade reaction
Source: Royal Society of Chemistry journal article supplement (doi:10.1039/d2cc05905c), 2022-01-01

### Supporting Information

## Direct synthesis of C3-alkynyl pyrroloindolines from tryptamines via a visible-light-induced radical cascade reaction

LinLin Ren<sup>§</sup>, Yonggong Wang<sup>§</sup>, Yanman Huo, Xiaogang Tong\* and Chengfeng Xia\*

Key Laboratory of Medicinal Chemistry for Natural Resource, Ministry of Education;  
Yunnan Provincial Center for Research & Development of Natural Products, School of  
Pharmacy, Yunnan University, Kunming 650500, P. R. China.

<sup>§</sup> These authors contributed equally to this work.

E-mail: xiacf@ynu.edu.cn, tongxg@ynu.edu.cn

## Table of Contents

|                                                                                             |    |
|---------------------------------------------------------------------------------------------|----|
| 1. General information .....                                                                | 1  |
| 2. General procedure A for the synthesis of typtamine derivate <b>1</b> .....               | 2  |
| 3. General procedure B for the synthesis of alkynyl sulfones <b>2</b> .....                 | 7  |
| 4. General procedure C for the synthesis of pyrroloindoline product <b>3</b> .....          | 18 |
| 5. Mechanistic investigations .....                                                         | 19 |
| 5.1 Luminescence quenching experiments .....                                                | 19 |
| 5.2 The light on-off experiment .....                                                       | 20 |
| 5.3 Controlled experiments .....                                                            | 22 |
| 6. Characterization of products .....                                                       | 23 |
| 7. Crystal Data and Structure Refinement for pyrroloindoline product <b>3ah</b> .....       | 41 |
| 8. Gram-scale synthesis and several transformation of pyrroloindoline product <b>3aa</b> .. | 44 |
| 9. References .....                                                                         | 49 |
| 10. Copies of NMR spectra.....                                                              | 50 |

## 1. General information

All the reaction were performed under argon atmosphere unless other noted. Unless otherwise noted, all other reagents and starting materials were purchased from commercial source and used without further purification. Thin layer chromatography was carried out on GF254 plates (0.25 mm layer thickness). Flash chromatography was performed with 200-300 mesh silica gels. Reactions were monitored by TLC and visualized by a dual short wave/long wave UV lamp. Photochemical reactions were carried with two 18 W LEDs (composed of 18 LED units each with 1.0 W).  $^1\text{H}$ ,  $^{13}\text{C}$  and  $^{19}\text{F}$  NMR spectra were recorded on Bruker Avance 500 or 600 MHz spectrophotometers. Chemical shifts in  $^1\text{H}$  NMR spectra were reported in parts per million (ppm) on the  $\delta$  scale. Data for  $^1\text{H}$  NMR were reported as follows: chemical shift, multiplicity (s = singlet, d = doublet, t = triplet, q = quartet, m = multiplet, br. s = broad singlet), coupling constant in Hertz (Hz) and integration. Data for  $^{13}\text{C}$  NMR spectra were reported in terms of chemical shift in ppm. HR-ESI-MS were taken on Agilent 6540 Q-TOF spectrometer. The emission spectra were recorded in a Hitachi F-7000 fluorescence spectrometer.

## 2. General procedure A for the synthesis of typtamine derivate 1.

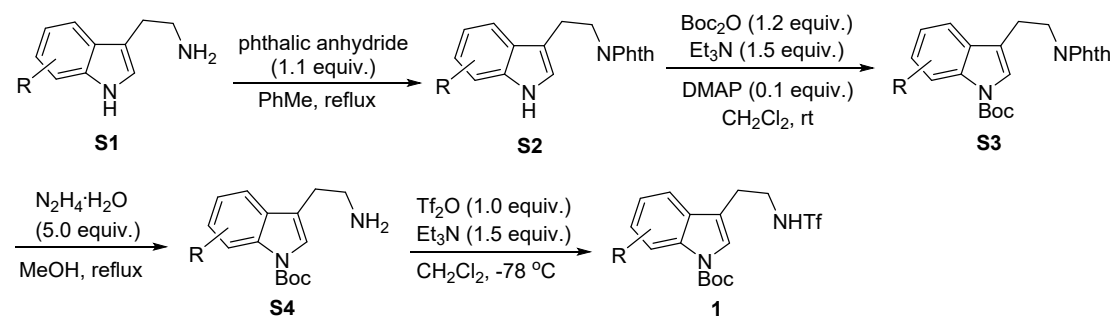

**Scheme S1.** Reaction sequence for the preparation of typtamine derivate 1.

A mixture of tryptamine **S1** (10.0 mmol, 1.0 equiv.) and phthalic anhydride (1.63 g, 11.0 mmol, 1.1 equiv.) in toluene (80 mL) was refluxed overnight. The mixture was concentrated under reduced pressure to give a residual solid, which was recrystallized from  $\text{CH}_2\text{Cl}_2$  and hexanes to afford Phth-protected **S2** as yellow crystals.<sup>1</sup>

To a solution of the Phth-protected **S2** (10.0 mmol, 1.0 equiv.) in  $\text{CH}_2\text{Cl}_2$  (50 mL) was added  $\text{Et}_3\text{N}$  (2.08 mL, 15.0 mmol, 1.5 equiv.),  $(\text{Boc})_2\text{O}$  (2.76 mL, 12.0 mmol, 1.2 equiv.) and DMAP (122.2 mg, 1.0 mmol, 0.1 equiv.) at 25 °C. After stirring for 20 min, saturated  $\text{NH}_4\text{Cl}$  solution (50 mL) was added to quench the reaction. The mixture was extracted with  $\text{CH}_2\text{Cl}_2$  (50 mL  $\times$  2). The combined organic layers were washed with brine (100 mL  $\times$  1), dried over anhydrous  $\text{Na}_2\text{SO}_4$ , filtered, and concentrated in vacuo. The residue was purified by silica gel column chromatography to give the Boc-protected **S3** as yellow oil.

To a solution of the Boc-protected **S3** (10.0 mmol, 1.0 equiv.) in methanol (80 mL) was added  $\text{N}_2\text{H}_4\cdot\text{H}_2\text{O}$  (2.43 mL, 50.0 mmol, 5.0 equiv.). After stirring for 3 h at reflux, 2 N  $\text{NaOH}$  was added at 25 °C to quench the reaction. The mixture was extracted with  $\text{CH}_2\text{Cl}_2$  (50 mL  $\times$  3), dried over anhydrous  $\text{Na}_2\text{SO}_4$ , filtered, and concentrated in vacuo. The resulting crude amine **S4** was used in the subsequent step without further purification.<sup>2</sup>

To a stirred solution of the above crude amine **S4** (10.0 mmol, 1.0 equiv.) in CH<sub>2</sub>Cl<sub>2</sub> (50 mL) and Et<sub>3</sub>N (2.08 mL, 15.0 mmol, 1.5 equiv.) was added dropwise Tf<sub>2</sub>O (1.68 mL, 10.0 mmol, 1.0 equiv.) at -78 °C. The reaction mixture was allowed to stir at room temperature for 30 min and was then quenched with saturated aqueous NaHCO<sub>3</sub> (20 mL). The reaction mixture was extracted with CH<sub>2</sub>Cl<sub>2</sub> (50 mL × 3). The combined organic layers were washed with saturated brine (100 mL), dried over Na<sub>2</sub>SO<sub>4</sub>, filtered, and concentrated. The cured mixture was purified by column chromatography on silica gel (eluent: petroleum ether/EtOAc = 20/1) to give the Tf-protected tryptamine **1** as light yellow oil.<sup>3</sup>

**tert-butyl 3-(2-((trifluoromethyl)sulfonamido)ethyl)-1H-indole-1-carboxylate (1a)**

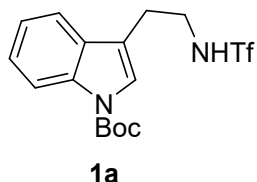

Following the general procedure A, **1a** was isolated as light yellow oil (2.04 g, 52% yield over four steps from tryptamine) by flash column chromatography (petroleum ether/AcOEt = 20/1, V/V). <sup>1</sup>H NMR (400 MHz, CDCl<sub>3</sub>) δ 8.15 (d, *J* = 7.4 Hz, 1H), 7.55 – 7.43 (m, 2H), 7.39 – 7.32 (m, 1H), 7.31 – 7.24 (m, 1H), 5.00 (t, *J* = 5.5 Hz, 1H), 3.63 (q, *J* = 6.6 Hz, 2H), 3.02 (t, *J* = 6.67 Hz, 2H), 1.68 (s, 9H); <sup>13</sup>C NMR (100 MHz, CDCl<sub>3</sub>) δ 149.8, 136.0, 129.9, 125.2, 124.1, 123.1, 119.9 (q, *J*<sub>CF</sub> = 319.0 Hz), 118.8, 115.8, 115.7, 84.3, 44.1, 28.5, 26.6; <sup>19</sup>F NMR (376 MHz, CDCl<sub>3</sub>) δ -77.394 (s, 3F); HR-ESI-MS (*m/z*): calcd. for C<sub>16</sub>H<sub>18</sub>F<sub>3</sub>N<sub>2</sub>O<sub>4</sub>S [M - H]<sup>-</sup> 391.0945, found 391.0950.

**tert-butyl 5-chloro-3-(2-((trifluoromethyl)sulfonamido)ethyl)-1H-indole-1-carboxylate (1b)**

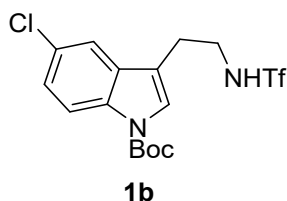

Following the general procedure A, **1b** was isolated as light yellow oil (2.00 g, 47%

yield over four steps from 5-chlorotryptamine) by flash column chromatography (petroleum ether/AcOEt = 20/1, V/V).  $^1\text{H}$  NMR (600 MHz,  $\text{CDCl}_3$ )  $\delta$  8.05 (br. s, 1H), 7.48 (br. s, 1H), 7.44 (d,  $J = 2.0$  Hz, 1H), 7.28 (dd,  $J = 8.8, 2.0$  Hz, 1H), 5.19 (t,  $J = 5.7$  Hz, 1H), 3.61 (q,  $J = 6.8$  Hz, 2H), 2.97 (t,  $J = 6.8$  Hz, 2H), 1.66 (s, 9H);  $^{13}\text{C}$  NMR (150 MHz,  $\text{CDCl}_3$ )  $\delta$  149.5, 134.3, 131.2, 128.9, 125.35, 125.31, 119.9 (q,  $J_{\text{CF}} = 319.1$  Hz), 118.5, 116.8, 115.2, 84.8, 43.9, 28.4, 26.5;  $^{19}\text{F}$  NMR (564 MHz,  $\text{CDCl}_3$ )  $\delta$  -77.4 (s, 3F); HR-ESI-MS ( $m/z$ ): calcd. for  $\text{C}_{16}\text{H}_{18}\text{ClF}_3\text{N}_2\text{O}_4\text{SNa}$   $[\text{M} + \text{Na}]^+$  449.0520, found 449.0522.

***tert*-butyl 5-bromo-3-(2-((trifluoromethyl)sulfonamido)ethyl)-1*H*-indole-1-carboxylate (1c)**

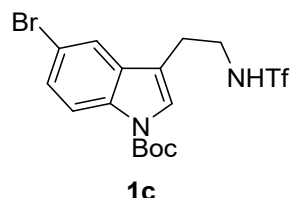

Following the general procedure A, **1c** was isolated as light yellow oil (2.40 g, 51% yield over four steps from 5-bromotryptamine) by flash column chromatography (petroleum ether/AcOEt = 20/1, V/V).  $^1\text{H}$  NMR (600 MHz,  $\text{CDCl}_3$ )  $\delta$  8.00 (br. s, 1H), 7.60 (d,  $J = 1.7$  Hz, 1H), 7.46 (br. s, 1H), 7.42 (dd,  $J = 8.8, 1.7$  Hz, 1H), 5.19 (t,  $J = 5.6$  Hz, 1H), 3.61 (q,  $J = 6.8$  Hz, 2H), 2.97 (t,  $J = 6.8$  Hz, 2H), 1.66 (s, 9H);  $^{13}\text{C}$  NMR (150 MHz,  $\text{CDCl}_3$ )  $\delta$  149.5, 134.6, 131.7, 128.0, 125.2, 121.5, 119.9 (q,  $J_{\text{CF}} = 319.4$  Hz), 117.2, 116.5, 115.1, 84.8, 43.9, 28.4, 26.4;  $^{19}\text{F}$  NMR (564 MHz,  $\text{CDCl}_3$ )  $\delta$  -77.4 (s, 3F); HR-ESI-MS ( $m/z$ ): calcd. for  $\text{C}_{16}\text{H}_{18}\text{BrF}_3\text{N}_2\text{O}_4\text{SNa}$   $[\text{M} + \text{Na}]^+$  493.0015, found 493.0019.

***tert*-butyl 5-methyl-3-(2-((trifluoromethyl)sulfonamido)ethyl)-1*H*-indole-1-carboxylate (1d)**

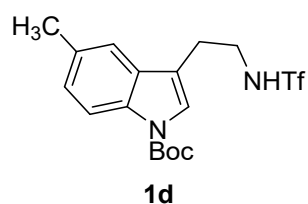

Following the general procedure A, **1d** was isolated as light yellow oil (1.75 g, 43% yield over four steps from 5-methyltryptamine) by flash column chromatography (petroleum ether/AcOEt = 20/1, V/V). <sup>1</sup>H NMR (600 MHz, CDCl<sub>3</sub>) δ 8.00 (br. s, 1H), 7.43 (br. s, 1H), 7.28 (s, 1H), 7.17 (d, *J* = 8.5 Hz, 1H), 5.27 (br. s, 1H), 3.62 (t, *J* = 6.8 Hz, 2H), 2.99 (t, *J* = 6.8 Hz, 2H), 2.46 (s, 3H), 1.67 (s, 9H); <sup>13</sup>C NMR (150 MHz, CDCl<sub>3</sub>) δ 149.9, 134.1, 132.6, 130.1, 126.5, 124.1, 119.9 (q, *J*<sub>CF</sub> = 319.4 Hz), 118.7, 115.6, 115.4, 84.1, 44.0, 28.4, 26.5, 21.6; <sup>19</sup>F NMR (564 MHz, CDCl<sub>3</sub>) δ -77.4 (s, 3F); HR-ESI-MS (*m/z*): calcd. for C<sub>17</sub>H<sub>21</sub>F<sub>3</sub>N<sub>2</sub>O<sub>4</sub>SNa [M + Na]<sup>+</sup> 429.1066, found 429.1068.

**tert-butyl 5-methoxy-3-(2-((trifluoromethyl)sulfonamido)ethyl)-1H-indole-1-carboxylate (1e)**

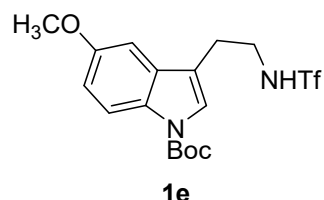

Following the general procedure A, **1e** was isolated as light yellow oil (2.03 g, 48% yield over four steps from 5-methoxytryptamine) by flash column chromatography (petroleum ether/AcOEt = 15/1, V/V). <sup>1</sup>H NMR (600 MHz, CDCl<sub>3</sub>) δ 7.99 (br. s, 1H), 7.42 (br. s, 1H), 6.95 – 6.92 (m, 2H), 5.38 (t, *J* = 5.4 Hz, 1H), 3.84 (s, 3H), 3.61 (q, *J* = 6.8 Hz, 2H), 2.97 (t, *J* = 6.8 Hz, 2H), 1.65 (s, 9H); <sup>13</sup>C NMR (150 MHz, CDCl<sub>3</sub>) δ 156.2, 149.8, 130.8, 124.6, 119.9 (q, *J*<sub>CF</sub> = 319.1 Hz), 116.5, 115.6, 113.6, 110.4, 101.7, 84.2, 56.0, 44.0, 28.4, 26.6; <sup>19</sup>F NMR (564 MHz, CDCl<sub>3</sub>) δ -77.4 (s, 3F); HR-ESI-MS (*m/z*): calcd. for C<sub>17</sub>H<sub>21</sub>F<sub>3</sub>N<sub>2</sub>O<sub>5</sub>SNa [M + Na]<sup>+</sup> 445.1015, found 445.1015.

**tert-butyl 6-fluoro-3-(2-((trifluoromethyl)sulfonamido)ethyl)-1H-indole-1-carboxylate (1f)**

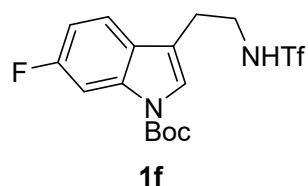

Following the general procedure A, **1f** was isolated as light yellow oil (1.68 g, 41%

yield over four steps from 6-fluorotryptamine) by flash column chromatography (petroleum ether/AcOEt = 20/1, V/V). <sup>1</sup>H NMR (600 MHz, CDCl<sub>3</sub>) δ 7.85 (br. s, 1H), 7.43 (s, 1H), 7.40 (dd, *J* = 8.8, 5.2 Hz, 1H), 7.01 (td, *J* = 8.8, 2.2 Hz, 1H), 5.25-5.02 (m, 1H), 3.61 (t, *J* = 6.8 Hz, 2H), 2.99 (t, *J* = 6.8 Hz, 2H), 1.67 (s, 9H); <sup>13</sup>C NMR (150 MHz, CDCl<sub>3</sub>) δ 161.5 (d, *J*<sub>CF</sub> = 239.0 Hz), 149.6, 136.2, 126.2, 124.2, 119.9 (q, *J*<sub>CF</sub> = 318.9 Hz), 119.5 (d, *J*<sub>CF</sub> = 9.9 Hz), 115.7, 111.4 (d, *J*<sub>CF</sub> = 24.3 Hz), 103.2 (d, *J*<sub>CF</sub> = 28.2 Hz), 84.8, 44.0, 28.4, 26.6; <sup>19</sup>F NMR (564 MHz, CDCl<sub>3</sub>) δ -77.4 (s, 3F), -116.6 (s, 1F); HR-ESI-MS (*m/z*): calcd. for C<sub>16</sub>H<sub>18</sub>F<sub>4</sub>N<sub>2</sub>O<sub>4</sub>SNa [M + Na]<sup>+</sup> 433.0816, found 433.0817.

***tert*-butyl 6-chloro-3-(2-((trifluoromethyl)sulfonamido)ethyl)-1*H*-indole-1-carboxylate (1g)**

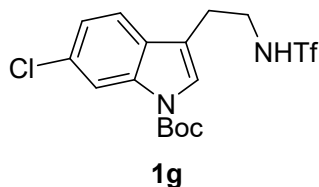

Following the general procedure A, **1g** was isolated as light yellow oil (1.87 g, 44% yield over four steps from 6-chlorotryptamine) by flash column chromatography (petroleum ether/AcOEt = 20/1, V/V). <sup>1</sup>H NMR (400 MHz, CDCl<sub>3</sub>) δ 8.17 (br. s, 1H), 7.44 (s, 1H), 7.39 (d, *J* = 8.4 Hz, 1H), 7.23 (dd, *J* = 8.4, 1.9 Hz, 1H), 5.05 (br. s, 1H), 3.61 (q, *J* = 6.5 Hz, 2H), 2.99 (t, *J* = 6.5, 6.3 Hz, 2H), 1.67 (s, 9H); <sup>13</sup>C NMR (100 MHz, CDCl<sub>3</sub>) δ 149.4, 136.3, 131.3, 128.4, 124.5, 123.7, 119.9 (q, *J*<sub>CF</sub> = 319.2 Hz), 119.5, 116.1, 115.6, 84.9, 44.0, 28.4, 26.5; <sup>19</sup>F NMR (376 MHz, CDCl<sub>3</sub>) δ -77.4 (s, 3F); HR-ESI-MS (*m/z*): calcd. for C<sub>16</sub>H<sub>18</sub>ClF<sub>3</sub>N<sub>2</sub>O<sub>4</sub>SNa [M + Na]<sup>+</sup> 449.0520, found 449.0523.

**1,1,1-trifluoro-*N*-(2-(1-(phenylsulfonyl)-1*H*-indol-3-yl)ethyl)methanesulfonamide (1h)**

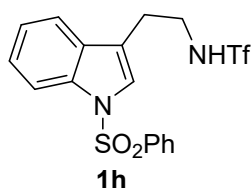

Following the general procedure A, **1h** was isolated as light gray solids (2.03 g, 47%



yield over four steps from tryptamine) by flash column chromatography (petroleum ether/AcOEt = 15/1, V/V).  $^1\text{H}$  NMR (400 MHz,  $\text{CDCl}_3$ )  $\delta$  8.01 (d,  $J = 8.3$  Hz, 1H), 7.88 (d,  $J = 7.8$  Hz, 2H), 7.54 (t,  $J = 7.4$  Hz, 1H), 7.50 – 7.41 (m, 4H), 7.36 (t,  $J = 7.8$  Hz, 1H), 7.27 (t,  $J = 7.6$  Hz, 1H), 5.14 (br. s, 1H), 3.59 (q,  $J = 6.7$  Hz, 2H), 2.99 (t,  $J = 6.7$  Hz, 2H);  $^{13}\text{C}$  NMR (100 MHz,  $\text{CDCl}_3$ )  $\delta$  138.1, 135.6, 134.3, 130.3, 129.7, 127.0, 125.6, 124.3, 123.9, 119.8 (q,  $J_{\text{CF}} = 319.4$  Hz), 119.4, 118.2, 114.2, 43.8, 26.6;  $^{19}\text{F}$  NMR (376 MHz,  $\text{CDCl}_3$ )  $\delta$  -77.4 (s, 3F); HR-ESI-MS ( $m/z$ ): calcd. for  $\text{C}_{17}\text{H}_{15}\text{F}_3\text{N}_2\text{O}_4\text{S}_2\text{Na}$  [ $\text{M} + \text{Na}$ ] $^+$  455.0318, found 455.0316.

### 3. General procedure B for the synthesis of alkynyl sulfones **2**.

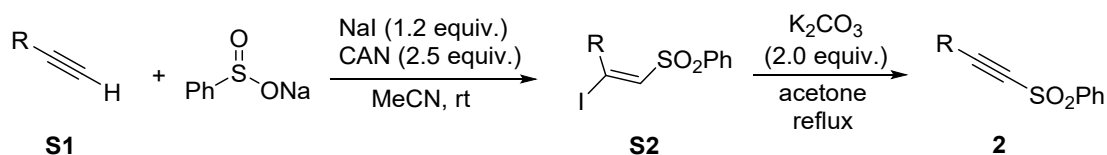

**Scheme S2.** Reaction sequence for the preparation of alkynyl sulfones **2**.<sup>4</sup>

Alkynyl sulfones were prepared according to the known procedures. To a stirred solution of alkyne **S1** (5.0 mmol, 1.0 equiv.) in dry MeCN (50 mL) at 0 °C was slowly added sodium benzenesulfinate (985.0 mg, 6.0 mmol, 1.2 equiv.), NaI (899.3 mg, 6.0 mmol, 1.2 equiv.) and CAN (6.58 g, 12.5 mmol, 2.5 equiv.) under argon atmosphere. Then, the mixture was vigorously stirred at room temperature overnight. After the completion of the reaction, it was quenched with sat. aqueous  $\text{Na}_2\text{S}_2\text{O}_3$  (30 mL). The quenched mixture was poured into  $\text{H}_2\text{O}$  (30 mL) and extracted with  $\text{CH}_2\text{Cl}_2$  ( $3 \times 30$  mL). The combined organic layers were washed with brine (90 mL), dried over  $\text{MgSO}_4$ , filtered, and concentrated by rotary evaporation to afford cured iodosulfone **S2** without any purification.

The cured iodosulfone **S2** were dissolved in dry acetone (50 mL) and refluxed with  $\text{K}_2\text{CO}_3$  (1.38 g, 10.0 mmol, 2.0 equiv.) for about 5 hours. Upon completion, the reaction was quenched with sat. aqueous  $\text{NH}_4\text{Cl}$  solution (30 mL), and extracted with EtOAc ( $3 \times 30$  mL). The combined organic layers were washed with brine (90 mL), dried over  $\text{MgSO}_4$ , filtered, and concentrated by rotary evaporation. The residue was purified by

column chromatography to afford the desired alkynyl sulfones **2**.

### **((phenylethynyl)sulfonyl)benzene (2a)**

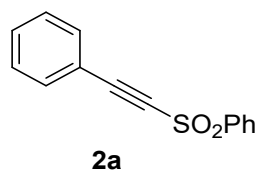

Following the general procedure B, **2a** was isolated as pale solids (774.5 mg, 64% yield over two steps from ethynylbenzene) by flash column chromatography (petroleum ether/AcOEt = 15/1, V/V). <sup>1</sup>H NMR (600 MHz, CDCl<sub>3</sub>) δ 8.12 – 8.06 (m, 2H), 7.69 (t, *J* = 7.6 Hz, 1H), 7.60 (t, *J* = 7.8 Hz, 2H), 7.55 – 7.51 (m, 2H), 7.48 (t, *J* = 7.6 Hz, 1H), 7.37 (t, *J* = 7.8 Hz, 2H); <sup>13</sup>C NMR (150 MHz, CDCl<sub>3</sub>) δ 142.2, 134.4, 133.1, 131.9, 129.7, 129.0, 127.7, 118.2, 93.8, 85.7; HR-ESI-MS (*m/z*): calcd. for C<sub>14</sub>H<sub>10</sub>O<sub>2</sub>SNa [M + Na]<sup>+</sup> 265.0294, found 265.0293.

### **1-fluoro-2-((phenylsulfonyl)ethynyl)benzene (2b)**

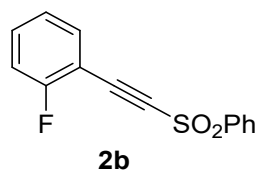

Following the general procedure B, **2b** was isolated as pale solids (871.1 mg, 67% yield over two steps from 1-ethynyl-2-fluorobenzene) by flash column chromatography (petroleum ether/AcOEt = 15/1, V/V). <sup>1</sup>H NMR (600 MHz, CDCl<sub>3</sub>) δ 8.08 (d, *J* = 7.6 Hz, 2H), 7.69 (t, *J* = 7.6 Hz, 1H), 7.60 (t, *J* = 7.6 Hz, 2H), 7.52 – 7.43 (m, 2H), 7.15 (t, *J* = 7.6 Hz, 1H), 7.09 (t, *J* = 7.6 Hz, 1H); <sup>13</sup>C NMR (150 MHz, CDCl<sub>3</sub>) δ 163.7 (d, *J*<sub>CF</sub> = 255.9 Hz), 141.9, 134.6, 134.4, 134.0 (d, *J*<sub>CF</sub> = 8.0 Hz), 129.7, 127.7, 124.7 (d, *J*<sub>CF</sub> = 3.8 Hz), 116.3 (d, *J*<sub>CF</sub> = 20.0 Hz), 107.2 (d, *J*<sub>CF</sub> = 15.3 Hz), 90.0, 87.4; <sup>19</sup>F NMR (564 MHz, CDCl<sub>3</sub>) δ -106.2 (s, 1F); HR-ESI-MS (*m/z*): calcd. for C<sub>14</sub>H<sub>10</sub>FO<sub>2</sub>S [M + H]<sup>+</sup> 261.0380, found 261.0378.

### **1-chloro-2-((phenylsulfonyl)ethynyl)benzene (2c)**

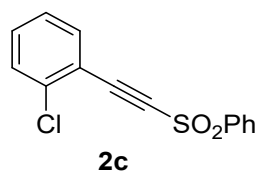

Following the general procedure B, **2c** was isolated as pale solids (979.8 mg, 71% yield over two steps from 1-chloro-2-ethynylbenzene) by flash column chromatography (petroleum ether/AcOEt = 15/1, V/V). <sup>1</sup>H NMR (600 MHz, CDCl<sub>3</sub>) δ 8.13 – 8.07 (m, 2H), 7.70 (t, *J* = 7.6 Hz, 1H), 7.61 (t, *J* = 7.8 Hz, 2H), 7.56 – 7.51 (m, 1H), 7.44 – 7.37 (m, 2H), 7.29 – 7.24 (m, 1H); <sup>13</sup>C NMR (150 MHz, CDCl<sub>3</sub>) δ 141.7, 137.6, 134.3, 132.6, 129.8, 129.4, 127.5, 126.8, 118.4, 90.0, 89.5; HR-ESI-MS (*m/z*): calcd. for C<sub>14</sub>H<sub>9</sub>ClO<sub>2</sub>SNa [M + Na]<sup>+</sup> 298.9904, found 298.9906.

### 1-bromo-2-((phenylsulfonyl)ethynyl)benzene (**2d**)

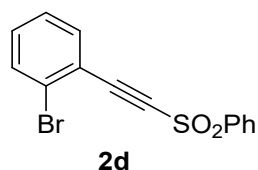

Following the general procedure B, **2d** was isolated as pale solids (991.8 mg, 62% yield over two steps from 1-bromo-2-ethynylbenzene) by flash column chromatography (petroleum ether/AcOEt = 15/1, V/V). <sup>1</sup>H NMR (600 MHz, CDCl<sub>3</sub>) δ 8.10 (d, *J* = 7.6 Hz, 2H), 7.69 (t, *J* = 7.6 Hz, 1H), 7.63 – 7.55 (m, 3H), 7.53 – 7.48 (m, 1H), 7.34 – 7.27 (m, 2H); <sup>13</sup>C NMR (150 MHz, CDCl<sub>3</sub>) δ 142.0, 134.7, 134.57, 133.17, 132.87, 129.67, 127.7, 127.6, 126.8, 120.9, 91.8, 89.1; HR-ESI-MS (*m/z*): calcd. for C<sub>14</sub>H<sub>10</sub>BrO<sub>2</sub>S [M + H]<sup>+</sup> 320.9579, found 320.9575.

### 1-methoxy-2-((phenylsulfonyl)ethynyl)benzene (**2e**)

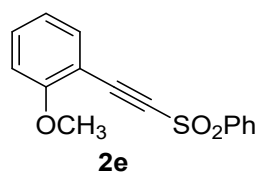

Following the general procedure B, **2e** was isolated as pale solids (802.5 mg, 59% yield over two steps from 1-ethynyl-2-methoxybenzene) by flash column chromatography

(petroleum ether/AcOEt = 15/1, V/V).  $^1\text{H}$  NMR (600 MHz,  $\text{CDCl}_3$ )  $\delta$  8.13 – 8.06 (m, 2H), 7.66 (t,  $J = 7.6$  Hz, 1H), 7.58 (t,  $J = 7.8$  Hz, 2H), 7.47 – 7.38 (m, 2H), 6.92 (t,  $J = 7.6$  Hz, 1H), 6.88 (d,  $J = 7.6$  Hz, 1H), 3.84 (s, 3H);  $^{13}\text{C}$  NMR (150 MHz,  $\text{CDCl}_3$ )  $\delta$  162.1, 142.6, 134.7, 134.1, 133.6, 129.5, 127.6, 120.8, 111.3, 107.5, 91.9, 89.2, 56.1; HR-ESI-MS ( $m/z$ ): calcd. for  $\text{C}_{15}\text{H}_{12}\text{O}_3\text{SNa}$  [ $\text{M} + \text{Na}$ ] $^+$  295.0399, found 295.0402.

### 1-chloro-3-((phenylsulfonyl)ethynyl)benzene (**2f**)

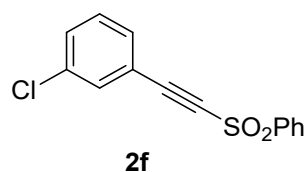

Following the general procedure B, **2f** was isolated as pale solids (841.8 mg, 61% yield over two steps from 1-chloro-3-ethynylbenzene) by flash column chromatography (petroleum ether/AcOEt = 15/1, V/V).  $^1\text{H}$  NMR (600 MHz,  $\text{CDCl}_3$ )  $\delta$  8.10 – 8.05 (m, 2H), 7.71 (t,  $J = 7.6$  Hz, 1H), 7.61 (t,  $J = 8.0$  Hz, 2H), 7.49 (s, 1H), 7.44 (d,  $J = 7.6$  Hz, 1H), 7.41 (d,  $J = 7.6$  Hz, 1H), 7.31 (t,  $J = 8.0$  Hz, 1H);  $^{13}\text{C}$  NMR (150 MHz,  $\text{CDCl}_3$ )  $\delta$  141.7, 135.0, 134.7, 132.6, 132.1, 131.1, 130.3, 129.7, 127.8, 119.8, 91.6, 86.4; HR-ESI-MS ( $m/z$ ): calcd. for  $\text{C}_{14}\text{H}_9\text{ClO}_2\text{SNa}$  [ $\text{M} + \text{Na}$ ] $^+$  298.9904, found 298.9906.

### 1-methyl-3-((phenylsulfonyl)ethynyl)benzene (**2g**)

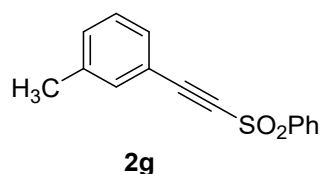

Following the general procedure B, **2g** was isolated as pale solids (934.6 mg, 73% yield over two steps from 1-ethynyl-3-methylbenzene) by flash column chromatography (petroleum ether/AcOEt = 15/1, V/V).  $^1\text{H}$  NMR (600 MHz,  $\text{CDCl}_3$ )  $\delta$  8.10 – 8.05 (m, 2H), 7.71 – 7.66 (m, 1H), 7.62 – 7.57 (m, 2H), 7.36 – 7.30 (m, 2H), 7.29 – 7.22 (m, 1H), 2.32 (s, 3H);  $^{13}\text{C}$  NMR (150 MHz,  $\text{CDCl}_3$ )  $\delta$  142.2, 138.9, 134.4, 133.4, 132.8, 130.2, 129.6, 128.9, 127.69, 117.9, 94.2, 85.3, 21.4; HR-ESI-MS ( $m/z$ ): calcd. for  $\text{C}_{15}\text{H}_{12}\text{O}_2\text{SNa}$  [ $\text{M} + \text{Na}$ ] $^+$  279.0450, found 279.0450.

### 1-fluoro-4-((phenylsulfonyl)ethynyl)benzene (2h)

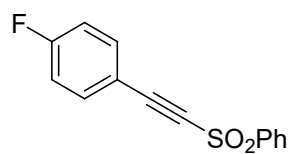

**2h**

Following the general procedure B, **2g** was isolated as pale solids (754.1 mg, 58% yield over two steps from 1-ethynyl-4-fluorobenzene) by flash column chromatography (petroleum ether/AcOEt = 15/1, V/V). <sup>1</sup>H NMR (600 MHz, CDCl<sub>3</sub>) δ 8.10 – 8.04 (m, 2H), 7.72 – 7.67 (m, 1H), 7.63 – 7.58 (m, 2H), 7.56 – 7.51 (m, 2H), 7.10 – 7.04 (m, 2H); <sup>13</sup>C NMR (150 MHz, CDCl<sub>3</sub>) δ 164.7 (d, *J*<sub>CF</sub> = 253.7 Hz), 141.9, 135.4 (d, *J*<sub>CF</sub> = 9.1 Hz), 134.5, 129.7, 127.7, 116.6 (d, *J*<sub>CF</sub> = 22.2 Hz), 114.3, 92.6, 85.5; <sup>19</sup>F NMR (564 MHz, CDCl<sub>3</sub>) δ -104.3 (s, 1F); HR-ESI-MS (*m/z*): calcd. for C<sub>14</sub>H<sub>9</sub>FO<sub>2</sub>SNa [M + Na]<sup>+</sup> 283.0199, found 283.0202.

### 1-chloro-4-((phenylsulfonyl)ethynyl)benzene (2i)

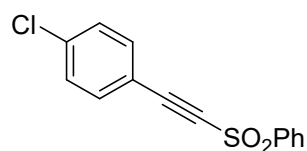

**2i**

Following the general procedure B, **2i** was isolated as pale solids (883.2 mg, 64% yield over two steps from 1-chloro-4-ethynylbenzene) by flash column chromatography (petroleum ether/AcOEt = 15/1, V/V). <sup>1</sup>H NMR (600 MHz, CDCl<sub>3</sub>) δ 8.10 – 8.05 (m, 2H), 7.70 (t, *J* = 7.6 Hz, 1H), 7.64 – 7.58 (m, 2H), 7.48 – 7.43 (m, 2H), 7.38 – 7.32 (m, 2H); <sup>13</sup>C NMR (150 MHz, CDCl<sub>3</sub>) δ 141.8, 138.4, 134.6, 134.2, 129.7, 129.5, 127.8, 116.6, 92.3, 86.4; HR-ESI-MS (*m/z*): calcd. for C<sub>14</sub>H<sub>9</sub>ClO<sub>2</sub>SNa [M + Na]<sup>+</sup> 298.9904, found 298.9903.

### 1-bromo-4-((phenylsulfonyl)ethynyl)benzene (2j)

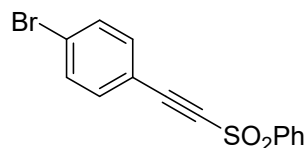

**2j**

Following the general procedure B, **2j** was isolated as pale solids (991.8 mg, 62% yield over two steps from 1-bromo-4-ethynylbenzene) by flash column chromatography (petroleum ether/AcOEt = 15/1, V/V). <sup>1</sup>H NMR (600 MHz, CDCl<sub>3</sub>) δ 8.10 – 8.04 (m, 2H), 7.72 – 7.67 (m, 1H), 7.61 (t, *J* = 7.8 Hz, 2H), 7.54 – 7.49 (m, 2H), 7.40 – 7.35 (m, 2H); <sup>13</sup>C NMR (150 MHz, CDCl<sub>3</sub>) δ 141.9, 134.6, 134.3, 132.4, 129.7, 127.7, 126.8, 117.1, 92.4, 86.6; HR-ESI-MS (*m/z*): calcd. for C<sub>14</sub>H<sub>9</sub>BrO<sub>2</sub>SNa [M + Na]<sup>+</sup> 342.9399, found 342.9400.

#### 4-((phenylsulfonyl)ethynyl)phenyl acetate (**2k**)

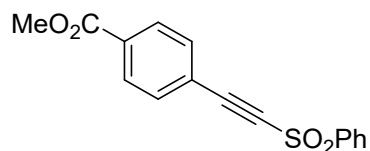

**2k**

Following the general procedure B, **2k** was isolated as pale solids (840.1 mg, 56% yield from over two steps methyl 4-ethynylbenzoate) by flash column chromatography (petroleum ether/AcOEt = 8/1, V/V). <sup>1</sup>H NMR (600 MHz, CDCl<sub>3</sub>) δ 8.08 (d, *J* = 8.0 Hz, 2H), 8.02 (d, *J* = 8.0 Hz, 2H), 7.71 (t, *J* = 7.4 Hz, 1H), 7.65 – 7.56 (m, 4H), 3.92 (s, 3H); <sup>13</sup>C NMR (150 MHz, CDCl<sub>3</sub>) δ 166.0, 141.7, 134.7, 132.9, 132.8, 129.9, 129.8, 127.8, 122.5, 91.9, 87.6, 52.8; HR-ESI-MS (*m/z*): calcd. for C<sub>16</sub>H<sub>13</sub>O<sub>4</sub>S [M + H]<sup>+</sup> 301.0529, found 301.0528.

#### 1-((phenylsulfonyl)ethynyl)-4-(trifluoromethoxy)benzene (**2l**)

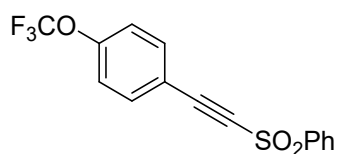

**2l**

Following the general procedure B, **2l** was isolated as pale solids (978.1 mg, 60% yield over two steps from 1-ethynyl-4-(trifluoromethoxy)benzene) by flash column

chromatography (petroleum ether/AcOEt = 10/1, V/V).  $^1\text{H}$  NMR (600 MHz,  $\text{CDCl}_3$ )  $\delta$  8.10 – 8.05 (m, 2H), 7.72 – 7.67 (m, 1H), 7.63 – 7.57 (m, 2H), 7.58 – 7.54 (m, 2H), 7.21 (d,  $J = 8.2$  Hz, 2H);  $^{13}\text{C}$  NMR (150 MHz,  $\text{CDCl}_3$ )  $\delta$  151.6, 141.9, 134.9, 134.6, 129.7, 127.7, 121.2, 120.5 (q,  $J_{\text{CF}} = 257.4$  Hz), 116.7, 91.8, 86.4; HR-ESI-MS ( $m/z$ ): calcd. for  $\text{C}_{16}\text{H}_{14}\text{O}_3\text{SNa}$  [ $\text{M} + \text{Na}$ ] $^+$  309.0556, found 309.0555.  $^{19}\text{F}$  NMR (564 MHz,  $\text{CDCl}_3$ )  $\delta$  -57.7 (s, 3F); HR-ESI-MS ( $m/z$ ): calcd. for  $\text{C}_{15}\text{H}_9\text{F}_3\text{O}_3\text{SNa}$  [ $\text{M} + \text{Na}$ ] $^+$  349.0117, found 349.0116.

### 1-((phenylsulfonyl)ethynyl)-4-(trifluoromethyl)benzene (**2m**)

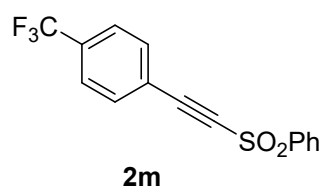

Following the general procedure B, **2m** was isolated as pale solids (821.6 mg, 53% yield over two steps from 1-ethynyl-4-(trifluoromethyl)benzene) by flash column chromatography (petroleum ether/AcOEt = 12/1, V/V).  $^1\text{H}$  NMR (400 MHz,  $\text{CDCl}_3$ )  $\delta$  8.13 – 8.06 (m, 2H), 7.75 – 7.69 (m, 1H), 7.68 – 7.59 (m, 6H);  $^{13}\text{C}$  NMR (100 MHz,  $\text{CDCl}_3$ )  $\delta$  141.5, 134.8, 133.4, 133.3 (q,  $J_{\text{CF}} = 32.8$  Hz), 129.8, 127.9, 125.9 (q,  $J_{\text{CF}} = 3.7$  Hz), 123.6 (q,  $J_{\text{CF}} = 271.1$  Hz), 122.0, 91.1, 87.3;  $^{19}\text{F}$  NMR (376 MHz,  $\text{CDCl}_3$ )  $\delta$  -63.3 (s, 3F); HR-ESI-MS ( $m/z$ ): calcd. for  $\text{C}_{15}\text{H}_{10}\text{F}_3\text{O}_2\text{S}$  [ $\text{M} + \text{H}$ ] $^+$  311.0348, found 311.0350.

### 1-methyl-4-((phenylsulfonyl)ethynyl)benzene (**2n**)

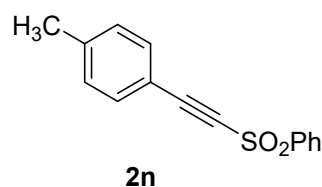

Following the general procedure B, **2n** was isolated as pale solids (832.2 mg, 65% yield over two steps from 1-ethynyl-4-methylbenzene) by flash column chromatography (petroleum ether/AcOEt = 15/1, V/V).  $^1\text{H}$  NMR (600 MHz,  $\text{CDCl}_3$ )  $\delta$  8.11 – 8.05 (m, 2H), 7.68 (t,  $J = 7.6$  Hz, 1H), 7.60 (t,  $J = 7.6$  Hz, 2H), 7.42 (d,  $J = 8.0$  Hz, 2H), 7.17 (d,

$J = 8.0$  Hz, 2H), 2.37 (s, 3H);  $^{13}\text{C}$  NMR (150 MHz,  $\text{CDCl}_3$ )  $\delta$  142.7, 142.3, 134.3, 133.0, 129.8, 129.6, 127.6, 115.0, 94.5, 85.2, 22.1; HR-ESI-MS ( $m/z$ ): calcd. for  $\text{C}_{15}\text{H}_{12}\text{O}_2\text{SNa}$   $[\text{M} + \text{Na}]^+$  279.0450, found 279.0450.

### 1-pentyl-4-((phenylsulfonyl)ethynyl)benzene (2o)

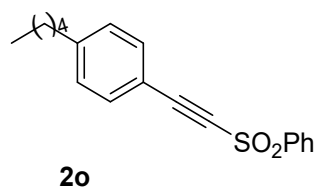

Following the general procedure B, **2o** was isolated as pale solids (952.0 mg, 61% yield over two steps from 1-ethynyl-4-pentylbenzene) by flash column chromatography (petroleum ether/AcOEt = 15/1, V/V).  $^1\text{H}$  NMR (600 MHz,  $\text{CDCl}_3$ )  $\delta$  8.10 – 8.05 (m, 2H), 7.67 (t,  $J = 7.6$  Hz, 1H), 7.59 (t,  $J = 7.6$  Hz, 2H), 7.43 (d,  $J = 8.2$  Hz, 2H), 7.17 (d,  $J = 8.2$  Hz, 2H), 2.60 (t,  $J = 7.6$  Hz, 2H), 1.62 – 1.54 (m, 2H), 1.35 – 1.23 (m, 4H), 0.87 (t,  $J = 7.1$  Hz, 3H);  $^{13}\text{C}$  NMR (150 MHz,  $\text{CDCl}_3$ )  $\delta$  147.7, 142.3, 134.3, 133.0, 129.6, 129.1, 127.6, 115.2, 94.6, 85.3, 36.3, 31.6, 30.9, 22.7, 14.2; HR-ESI-MS ( $m/z$ ): calcd. for  $\text{C}_{19}\text{H}_{20}\text{O}_2\text{SNa}$   $[\text{M} + \text{Na}]^+$  335.1076, found 335.1076.

### 1-ethoxy-4-((phenylsulfonyl)ethynyl)benzene (2p)

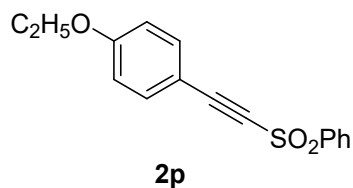

Following the general procedure B, **2p** was isolated as pale solids (944.0 mg, 66% yield over two steps from 1-ethoxy-4-ethynylbenzene) by flash column chromatography (petroleum ether/AcOEt = 10/1, V/V).  $^1\text{H}$  NMR (600 MHz,  $\text{CDCl}_3$ )  $\delta$  8.06 (d,  $J = 7.6$  Hz, 2H), 7.66 (t,  $J = 7.6$  Hz, 1H), 7.58 (t,  $J = 7.6$  Hz, 2H), 7.45 (d,  $J = 8.8$  Hz, 2H), 6.84 (d,  $J = 8.8$  Hz, 2H), 4.04 (q,  $J = 7.0$  Hz, 2H), 1.40 (t,  $J = 7.0$  Hz, 3H);  $^{13}\text{C}$  NMR (150 MHz,  $\text{CDCl}_3$ )  $\delta$  161.9, 142.4, 135.0, 134.2, 129.6, 127.5, 115.1, 109.5, 95.1, 84.8, 64.1, 14.8; HR-ESI-MS ( $m/z$ ): calcd. for  $\text{C}_{16}\text{H}_{14}\text{O}_3\text{SNa}$   $[\text{M} + \text{Na}]^+$  309.0556, found 309.0555.



### 4-((phenylsulfonyl)ethynyl)-1,1'-biphenyl (**2q**)

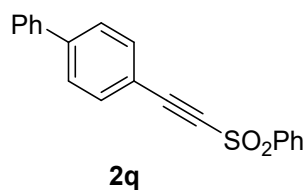

Following the general procedure B, **2q** was isolated as pale solids (1.15 g, 72% yield over two steps from 4-ethynyl-1,1'-biphenyl) by flash column chromatography (petroleum ether/AcOEt = 12/1, V/V). <sup>1</sup>H NMR (400 MHz, CDCl<sub>3</sub>) δ 8.14 – 8.08 (m, 2H), 7.74 – 7.67 (m, 1H), 7.66 – 7.53 (m, 8H), 7.50 – 7.42 (m, 2H), 7.42 – 7.36 (m, 1H); <sup>13</sup>C NMR (100 MHz, CDCl<sub>3</sub>) δ 144.6, 142.1, 139.7, 134.5, 133.5, 129.7, 129.3, 128.7, 127.7, 127.6, 127.4, 116.7, 93.9, 86.1; HR-ESI-MS (*m/z*): calcd. for C<sub>20</sub>H<sub>14</sub>O<sub>2</sub>SNa [M + Na]<sup>+</sup> 341.0607, found 341.0607.

### 2-((phenylsulfonyl)ethynyl)naphthalene (**2r**)

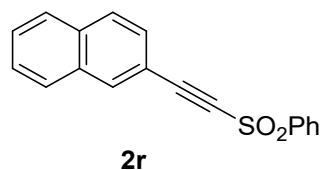

Following the general procedure B, **2r** was isolated as pale solids (1.11 g, 76% yield over two steps from 2-ethynyl naphthalene) by flash column chromatography (petroleum ether/AcOEt = 12/1, V/V). <sup>1</sup>H NMR (600 MHz, CDCl<sub>3</sub>) δ 8.15 – 8.09 (m, 3H), 7.83 (t, *J* = 8.6 Hz, 3H), 7.70 (t, *J* = 7.6 Hz, 1H), 7.62 (t, *J* = 7.6 Hz, 2H), 7.60 – 7.52 (m, 2H), 7.50 (dd, *J* = 8.6, 1.5 Hz, 1H); <sup>13</sup>C NMR (150 MHz) δ 142.0, 134.4, 134.2, 134.1, 132.4, 129.4, 128.6, 128.5, 128.3, 127.9, 127.5, 127.4, 127.3, 115.0, 94.0, 85.6; HR-ESI-MS (*m/z*): calcd. for C<sub>18</sub>H<sub>12</sub>O<sub>2</sub>SNa [M + Na]<sup>+</sup> 315.0450, found 315.0448.

### 9-((phenylsulfonyl)ethynyl)phenanthrene (**2s**)

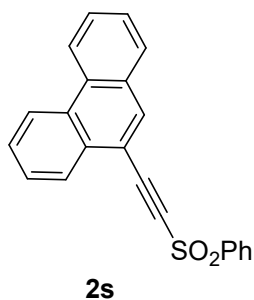

Following the general procedure B, **2s** was isolated as pale solids (1.50 g, 73% yield over two steps from 9-ethynylphenanthrene) by flash column chromatography (petroleum ether/AcOEt = 12/1, V/V). <sup>1</sup>H NMR (400 MHz, CDCl<sub>3</sub>) δ 8.60 (t, *J* = 8.4 Hz, 2H), 8.24 – 8.17 (m, 2H), 8.15 – 8.09 (m, 1H), 8.07 (s, 1H), 7.81 (d, *J* = 7.7 Hz, 1H), 7.75 – 7.57 (m, 7H); <sup>13</sup>C NMR (100 MHz, CDCl<sub>3</sub>) δ 142.3, 136.1, 134.5, 131.7, 130.4, 130.2, 130.1, 129.7, 129.6, 129.5, 128.02, 127.96, 127.7, 127.6, 126.3, 123.2, 123.0, 114.5, 93.0, 89.6; HR-ESI-MS (*m/z*): calcd. for C<sub>22</sub>H<sub>15</sub>O<sub>2</sub>S [M + H]<sup>+</sup> 343.0787, found 343.0791.

**(hept-1-yn-1-ylsulfonyl)benzene (2t)**

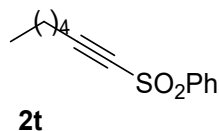

Following the general procedure B, **2t** was isolated as pale solids (625.5 mg, 53% yield over two steps from hept-1-yne) by flash column chromatography (petroleum ether/AcOEt = 50/1, V/V). <sup>1</sup>H NMR (600 MHz, CDCl<sub>3</sub>) δ 8.02 – 7.96 (m, 2H), 7.66 (t, *J* = 7.6 Hz, 1H), 7.56 (t, *J* = 7.6 Hz, 2H), 2.35 (t, *J* = 7.2 Hz, 2H), 1.57 – 1.49 (m, 2H), 1.32 – 1.24 (m, 4H), 0.85 (t, *J* = 7.1 Hz, 3H); <sup>13</sup>C NMR (150 MHz, CDCl<sub>3</sub>) δ 142.4, 134.2, 129.5, 127.4, 98.3, 78.5, 31.1, 26.9, 22.2, 19.2, 14.0; HR-ESI-MS (*m/z*): calcd. for C<sub>13</sub>H<sub>17</sub>O<sub>2</sub>S [M + H]<sup>+</sup> 237.0944, found 237.0947.

**((3,3-dimethylbut-1-yn-1-yl)sulfonyl)benzene (2u)**

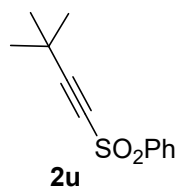

Following the general procedure B, **2u** was isolated as pale solids (732.8 mg, 55% yield over two steps from 3,3-dimethylbut-1-yne) by flash column chromatography (petroleum ether/AcOEt = 50/1, V/V).  $^1\text{H}$  NMR (400 MHz,  $\text{CDCl}_3$ )  $\delta$  8.03 – 7.95 (m, 2H), 7.66 (t,  $J = 7.6$  Hz, 1H), 7.57 (t,  $J = 7.6$  Hz, 2H), 1.24 (s, 9H);  $^{13}\text{C}$  NMR (100 MHz,  $\text{CDCl}_3$ )  $\delta$  142.4, 134.1, 129.5, 127.4, 104.5, 77.1, 29.7, 28.2; HR-ESI-MS ( $m/z$ ): calcd. for  $\text{C}_{12}\text{H}_{15}\text{O}_2\text{S}$  [ $\text{M} + \text{H}$ ] $^+$  223.0787, found 223.0789.

#### ((cyclopentylethynyl)sulfonyl)benzene (**2v**)

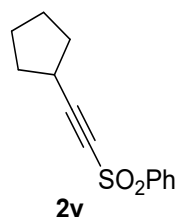

Following the general procedure B, **2v** was isolated as pale solids (884.8 mg, 63% yield over two steps from ethynylcyclopentane) by flash column chromatography (petroleum ether/AcOEt = 50/1, V/V).  $^1\text{H}$  NMR (400 MHz,  $\text{CDCl}_3$ )  $\delta$  8.05 – 7.93 (m, 2H), 7.65 (t,  $J = 7.6$  Hz, 1H), 7.56 (t,  $J = 7.6$  Hz, 2H), 2.83 – 2.68 (m, 1H), 2.03 – 1.85 (m, 2H), 1.76 – 1.50 (m, 6H);  $^{13}\text{C}$  NMR (100 MHz,  $\text{CDCl}_3$ )  $\delta$  142.3, 134.1, 129.5, 127.3, 102.0, 77.7, 32.9, 30.0, 25.5;

#### ((cyclohexylethynyl)sulfonyl)benzene (**2w**)

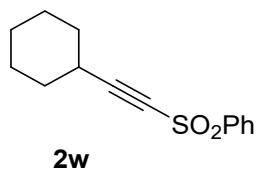

Following the general procedure B, **2w** was isolated as pale solids (744.3 mg, 60% yield over two steps from ethynylcyclohexane) by flash column chromatography (petroleum

ether/AcOEt = 50/1, V/V).  $^1\text{H}$  NMR (600 MHz,  $\text{CDCl}_3$ )  $\delta$  7.99 (d,  $J = 7.4$  Hz, 2H), 7.65 (t,  $J = 7.4$  Hz, 1H), 7.56 (t,  $J = 7.6$  Hz, 2H), 2.58 – 2.49 (m, 1H), 1.82 – 1.72 (m, 2H), 1.69 – 1.58 (m, 2H), 1.53 – 1.43 (m, 3H), 1.35 – 1.24 (m, 3H);  $^{13}\text{C}$  NMR (150 MHz,  $\text{CDCl}_3$ )  $\delta$  142.6, 134.1, 129.5, 127.3, 101.3, 78.5, 31.1, 29.3, 25.6, 24.7; HR-ESI-MS ( $m/z$ ): calcd. for  $\text{C}_{14}\text{H}_{17}\text{O}_2\text{S}$   $[\text{M} + \text{H}]^+$  249.0944, found 249.0945.

#### 4. General procedure C for the synthesis of pyrroloindoline product 3.

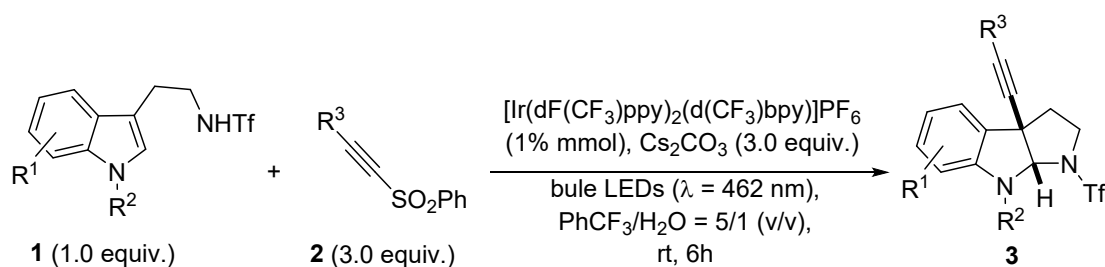

**Scheme S3.** Reaction for the preparation of pyrroloindoline product **3**.

To a 10 mL Schlenk reaction tube equipped with a magnetic stir bar, tryptamine derivative **1** (0.30 mmol, 1.0 equiv.), acetylenic sulfone **2** (0.90 mmol, 3.0 equiv.),  $[\text{Ir}(\text{dF}(\text{CF}_3)\text{ppy})_2(\text{d}(\text{CF}_3)\text{bpy})]\text{PF}_6$  (0.003 mmol, 0.01 equiv.),  $\text{Cs}_2\text{CO}_3$  (0.90 mmol, 3.0 equiv.),  $\text{PhCF}_3$  (5.0 mL) and  $\text{H}_2\text{O}$  (1.0 mL) were sequentially added. The reaction mixture was degassed three times by freeze-pump-thaw method. The tube was stirred and irradiated with two 18W light emitting diode (LED) lamps from approximately 10 cm away at room temperature for 6 h under argon atmosphere. After completion of the reaction (by TLC analysis), it was quenched with sat. aqueous  $\text{NH}_4\text{Cl}$  solution (10 mL), and extracted with EtOAc ( $3 \times 10$  mL). The combined organic layers were washed with brine (10 mL), dried over  $\text{Na}_2\text{SO}_4$ , filtered, and concentrated by rotary evaporation. The residue was purified by column chromatography to afford the desired pyrroloindoline product **3**.

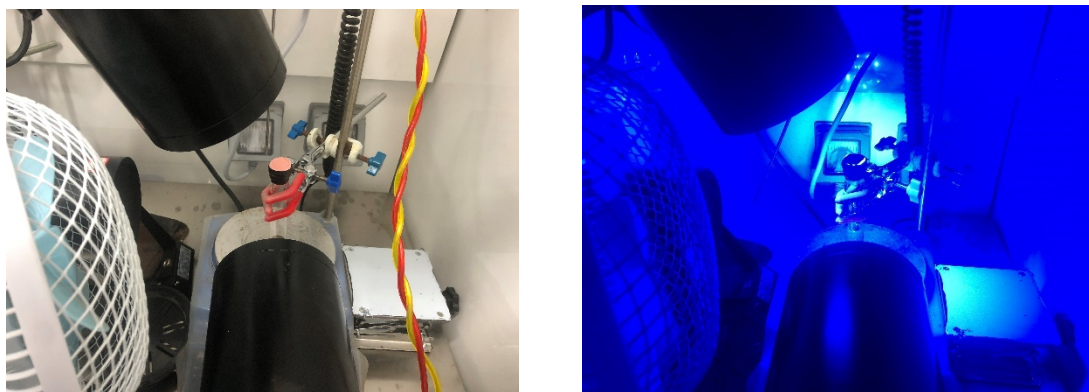

**Figure S1.** Details for the photochemical reaction setup at room temperature.

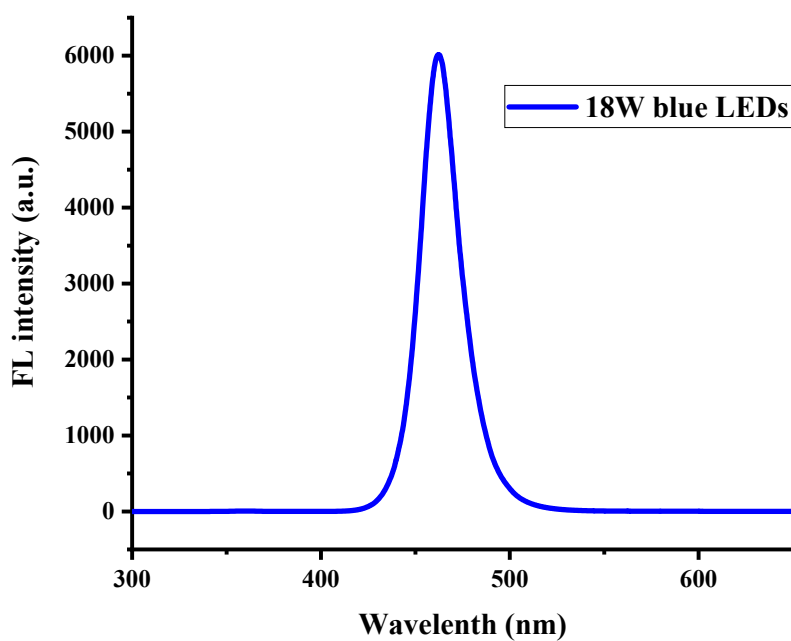

**Figure S2.** Emission spectra of the 18W blue LED lamps ( $\lambda_{\text{max}} = 462 \text{ nm}$ )

## 5. Mechanistic investigations

### 5.1 Luminescence quenching experiments

Fluorescence quenching experiments were performed on a Hitachi F-7000 fluorescence spectrometer. All  $[\text{Ir}(\text{dF}(\text{CF}_3)\text{ppy})_2(\text{d}(\text{CF}_3)\text{bpy})]\text{PF}_6$  (**PC5**) solution were excited at 400 nm and the emission intensity was collected from 410 to 780 nm. In a typical experiment, to a  $5 \times 10^{-5} \text{ M}$  solution of  $[\text{Ir}(\text{dF}(\text{CF}_3)\text{ppy})_2(\text{d}(\text{CF}_3)\text{bpy})]\text{PF}_6$  in  $\text{PhCF}_3/\text{H}_2\text{O} = 5/1$  (v/v) (rigorously degassed by freeze/pump/thaw) was added the

appropriate amount of quencher in a 10 x 10 nm light path quartz fluorescence cuvette. After degassing the sample with a stream of argon for 10 minutes, the emission of the sample was collected.

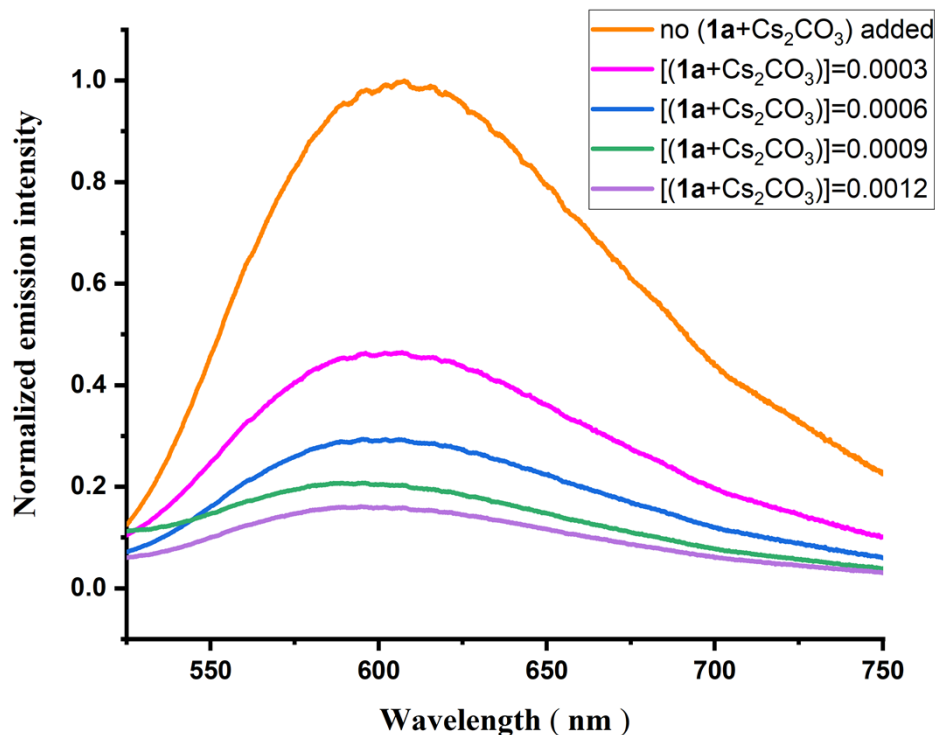

**Figure S3.** Quenching of [Ir(dF(CF<sub>3</sub>)ppy)<sub>2</sub>(d(CF<sub>3</sub>)bpy)]PF<sub>6</sub> emission ( $5 \times 10^{-5}$  M in PhCF<sub>3</sub>/H<sub>2</sub>O = 5/1 (v/v)) in the presence of increasing amounts of deprotonated **1a**.

## 5.2 The light on-off experiment

Following the general procedure **C**, the photochemical reaction was conducted for light-dark experiment. Aliquots of samples were taken out at various time points during the reaction. The crude NMR was taken on the concentrated crude reaction mixture and analyzed by <sup>1</sup>H NMR using diphenylacetonitrile as an internal standard.

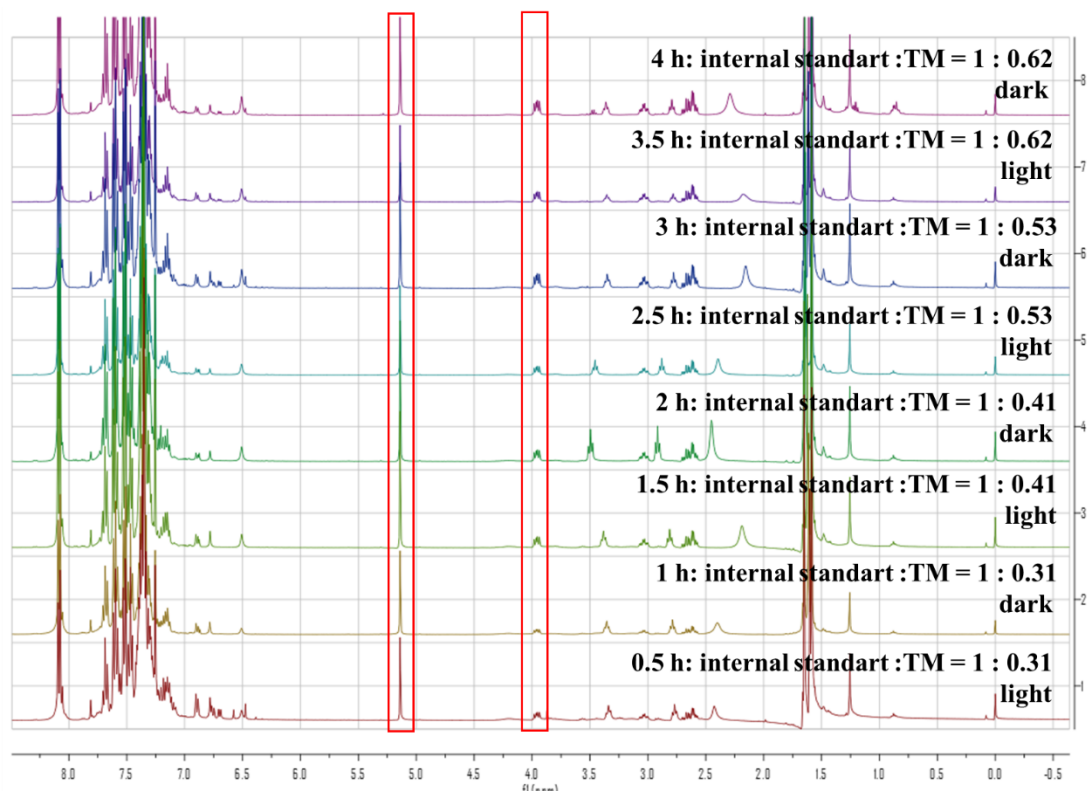

Figure S4. The light on–off experiment analyzed by  $^1\text{H}$  NMR.

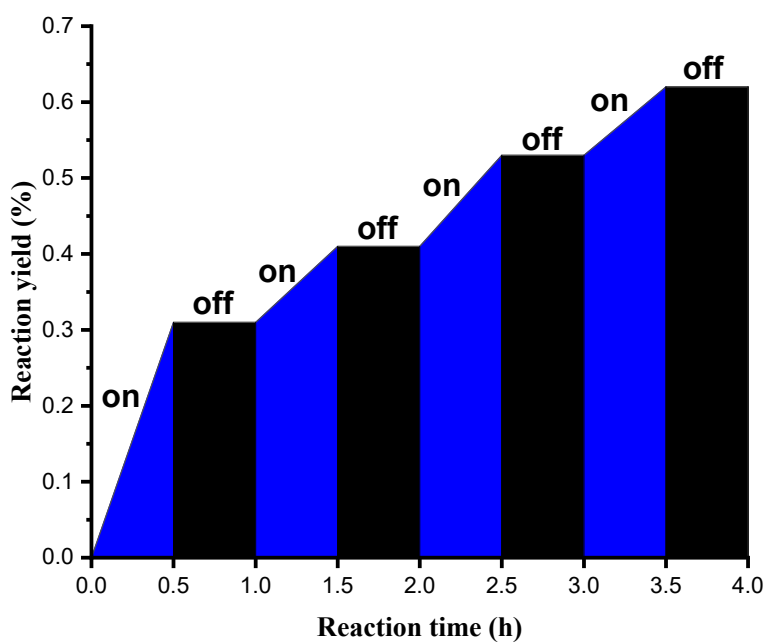

Figure S5. The light on–off experiment.

### 5.3 Controlled experiments

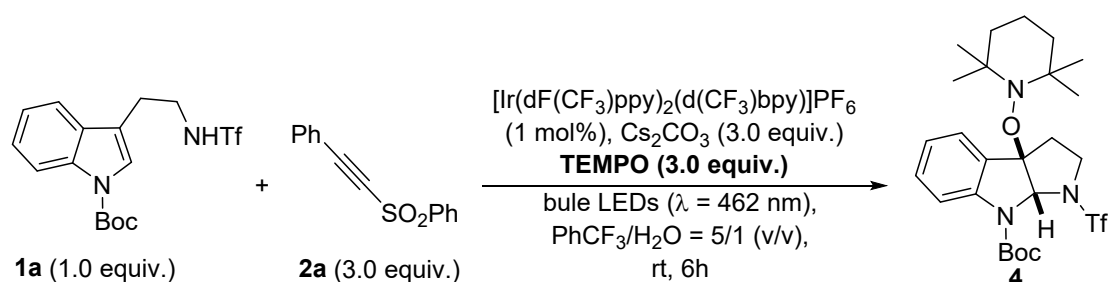

**Scheme S4.** Inhibition experiments with TEMPO.

To a 10 mL Schlenk reaction tube equipped with a magnetic stir bar, typtamine derivate **1a** (117.6 mg, 0.30 mmol, 1.0 equiv.), acetylenic sulfone **2a** (217.8 mg, 0.90 mmol, 3.0 equiv.) [Ir(dF(CF<sub>3</sub>)ppy)<sub>2</sub>(d(CF<sub>3</sub>)bpy)]PF<sub>6</sub> (3.4 mg, 0.003 mmol, 0.01 equiv.), Cs<sub>2</sub>CO<sub>3</sub> (293.2 mg, 0.90 mmol, 3.0 equiv.), TEMPO (140.6 mg, 0.90 mmol, 3.00 equiv), PhCF<sub>3</sub> (5.0 mL) and H<sub>2</sub>O (1.0 mL) were sequentially added. The reaction mixture was degassed three times by freeze-pump-thaw method. The tube was stirred and irradiated with two 18W light emitting diode (LED) lamps from approximately 10 cm away at room temperature for 6 h under argon atmosphere. After completion of the reaction (by TLC analysis), it was quenched with sat. aqueous NH<sub>4</sub>Cl solution (10 mL), and extracted with EtOAc (3 × 10 mL). The combined organic layers were washed with brine (10 mL), dried over Na<sub>2</sub>SO<sub>4</sub>, filtered, and concentrated by rotary evaporation. The residue was purified by column chromatography (petroleum ether/ethyl acetate = 30/1, V/V) to afford the TEMPO-trapped pyrroloindoline compound **4** (142.3 mg, 0.26 mmol, 87 %) as colorless powders. <sup>1</sup>H NMR (600 MHz, CDCl<sub>3</sub>) δ 7.71 (br. s, 1H), 7.37 (d, *J* = 7.5 Hz, 1H), 7.33 (t, *J* = 7.5 Hz, 1H), 7.14 (t, *J* = 7.5 Hz, 1H), 6.99 (s, 1H), 3.97 (dd, *J* = 11.4, 7.8 Hz, 1H), 2.98 (td, *J* = 11.4, 4.6 Hz, 1H), 2.75 (td, *J* = 12.5, 7.8 Hz, 1H), 2.44 (dd, *J* = 12.5, 4.6 Hz, 1H), 1.56 (s, 9H), 1.55 – 1.49 (m, 2H), 1.45 – 1.38 (m, 2H), 1.34 – 1.26 (m, 2H), 1.13 (s, 3H), 1.11 (s, 3H), 0.99 (s, 3H), 0.37 (s, 3H); <sup>13</sup>C NMR (150 MHz, CDCl<sub>3</sub>) δ 152.1, 144.0, 132.6, 130.5, 124.6, 124.3, 119.8 (q, *J*<sub>CF</sub> = 320.0 Hz), 117.0, 95.9, 82.6, 80.2, 60.8, 59.8, 49.3, 41.1, 40.8, 33.8, 33.0, 28.3, 20.7, 20.5, 17.1; <sup>19</sup>F NMR (564 MHz, CDCl<sub>3</sub>) δ -76.9 (s, 3F); HR-ESI-MS (*m/z*): calcd. for C<sub>25</sub>H<sub>36</sub>F<sub>3</sub>N<sub>3</sub>O<sub>5</sub>SNa [M + Na]<sup>+</sup>, 570.2220, found 570.2222.



## 6. Characterization of products

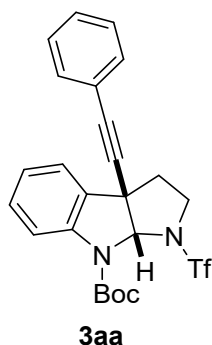

Prepared according to the general procedure **C**, **3aa** was isolated as pale solids (134.4 mg, 91% yield) by flash column chromatography (petroleum ether/ethyl acetate = 30/1, V/V).  $^1\text{H}$  NMR (600 MHz,  $\text{CDCl}_3$ ):  $\delta$  7.75 (br. s, 1H), 7.41 – 7.28 (m, 7H), 7.15 (t,  $J$  = 7.4 Hz, 1H), 6.51 (s, 1H), 3.96 (dd,  $J$  = 12.0, 7.0 Hz, 1H), 3.04 (td,  $J$  = 12.0, 4.6 Hz, 1H), 2.66 (td,  $J$  = 12.6, 7.0 Hz, 1H), 2.60 (dd,  $J$  = 12.6, 4.6 Hz, 1H), 1.59 (s, 9H);  $^{13}\text{C}$  NMR (150 MHz,  $\text{CDCl}_3$ )  $\delta$  151.8, 141.8, 131.9, 131.5, 130.0, 128.8, 128.5, 124.7, 123.5, 122.3, 119.8 (q,  $J_{\text{CF}}$  = 320.0 Hz), 117.0, 87.4, 85.7, 84.0, 83.4, 51.4, 49.1, 40.6, 28.2;  $^{19}\text{F}$  NMR (564 MHz,  $\text{CDCl}_3$ )  $\delta$  -76.5 (s, 3F); HR-ESI-MS ( $m/z$ ): calcd. for  $\text{C}_{24}\text{H}_{23}\text{F}_3\text{N}_2\text{O}_4\text{SNa}$  [ $\text{M} + \text{Na}$ ] $^+$ , 515.1223, found 515.1226.

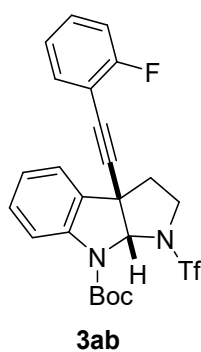

Prepared according to the general procedure **C**, **3ab** was isolated as pale solids (140.8 mg, 92% yield) by flash column chromatography (petroleum ether/ethyl acetate = 30/1, V/V).  $^1\text{H}$  NMR (600 MHz,  $\text{CDCl}_3$ )  $\delta$  7.75 (br. s, 1H), 7.40 – 7.27 (m, 4H), 7.15 (t,  $J$  = 7.6 Hz, 1H), 7.07 (t,  $J$  = 7.6, 4.5 Hz, 1H), 7.05 (t,  $J$  = 8.2 Hz, 1H), 6.53 (s, 1H), 3.97 (dd,  $J$  = 11.4, 7.1 Hz, 1H), 3.06 (td,  $J$  = 11.4, 4.6 Hz, 1H), 2.69 (td,  $J$  = 12.6, 7.1 Hz, 1H), 2.62 (dd,  $J$  = 12.6, 4.6 Hz, 1H), 1.59 (s, 9H);  $^{13}\text{C}$  NMR (150 MHz,  $\text{CDCl}_3$ )  $\delta$  163.0

(d,  $J_{CF} = 250.8$  Hz), 151.8, 141.9, 133.6, 131.1, 130.6 (d,  $J_{CF} = 8.0$  Hz), 130.0, 124.7, 124.1 (d,  $J_{CF} = 3.8$  Hz), 123.6, 119.9 (q,  $J_{CF} = 320.1$  Hz), 117.1, 115.7 (d,  $J_{CF} = 20.7$  Hz), 111.0 (d,  $J_{CF} = 15.8$  Hz), 92.5, 84.0, 83.4, 79.3, 51.6, 49.1, 40.4, 28.2;  $^{19}\text{F}$  NMR (564 MHz,  $\text{CDCl}_3$ )  $\delta$  -76.4 (s, 3F), -109.8 (s, 1F); HR-ESI-MS ( $m/z$ ): calcd. for  $\text{C}_{24}\text{H}_{22}\text{F}_4\text{N}_2\text{O}_4\text{SNa}$   $[\text{M} + \text{Na}]^+$ , 533.1129, found 533.1127.

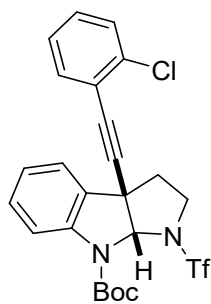

**3ac**

Prepared according to the general procedure **C**, **3ac** was isolated as pale solids (138.9 mg, 88% yield) by flash column chromatography (petroleum ether/ethyl acetate = 30/1, V/V).  $^1\text{H}$  NMR (600 MHz,  $\text{CDCl}_3$ )  $\delta$  7.76 (br. s, 1H), 7.43 – 7.36 (m, 3H), 7.34 (t,  $J = 7.8$ , 1H), 7.25 (td,  $J = 7.8$ , 1.6, 1H), 7.19 (td,  $J = 7.6$ , 1.0 Hz, 1H), 7.16 (t,  $J = 7.6$  Hz, 1H), 6.56 (s, 1H), 3.98 (dd,  $J = 11.4$ , 7.1 Hz, 1H), 3.08 (td,  $J = 11.4$ , 4.6 Hz, 1H), 2.70 (td,  $J = 12.6$ , 7.1 Hz, 1H), 2.63 (dd,  $J = 12.6$ , 4.6 Hz, 1H), 1.59 (s, 9H);  $^{13}\text{C}$  NMR (150 MHz,  $\text{CDCl}_3$ )  $\delta$  151.7, 141.9, 136.5, 133.2, 131.0, 130.0, 129.4, 126.6, 124.7, 123.6, 122.2, 119.8 (q,  $J_{CF} = 320.4$  Hz), 117.1, 92.6, 84.0, 83.3, 82.7, 51.6, 49.1, 40.1, 28.2;  $^{19}\text{F}$  NMR (564 MHz,  $\text{CDCl}_3$ )  $\delta$  -76.4 (s, 3F); HR-ESI-MS ( $m/z$ ): calcd. for  $\text{C}_{24}\text{H}_{22}\text{ClF}_3\text{N}_2\text{O}_4\text{SNa}$   $[\text{M} + \text{Na}]^+$ , 549.0833, found 549.0836.

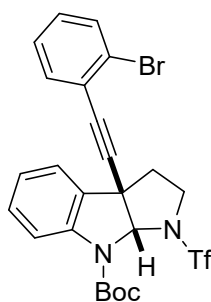

**3ad**

Prepared according to the general procedure **C**, **3ad** was isolated as pale solids (155.6

mg, 91% yield) by flash column chromatography (petroleum ether/ethyl acetate = 30/1, V/V).  $^1\text{H}$  NMR (600 MHz,  $\text{CDCl}_3$ )  $\delta$  7.76 (br. s, 1H), 7.56 (dd,  $J = 8.0, 0.7$  Hz, 1H), 7.56 (dd,  $J = 8.2, 0.7$  Hz, 1H), 7.42 – 7.37 (m, 2H), 7.34 (d,  $J = 7.6$  Hz, 1H), 7.24 (td,  $J = 7.6, 1.0$  Hz, 1H), 7.19 – 7.13 (m, 2H), 6.57 (s, 1H), 3.97 (dd,  $J = 11.4, 7.1$  Hz, 1H), 3.08 (td,  $J = 11.4, 4.6$  Hz, 1H), 2.71 (td,  $J = 12.6, 7.1$  Hz, 1H), 2.63 (dd,  $J = 12.6, 4.6$  Hz, 1H), 1.59 (s, 9H);  $^{13}\text{C}$  NMR (150 MHz,  $\text{CDCl}_3$ )  $\delta$  151.7, 142.0, 133.2, 132.6, 131.0, 130.0, 130.0, 127.2, 126.3, 124.7, 124.4, 123.6, 120.0 (q,  $J_{\text{CF}} = 320.4$  Hz), 117.2, 92.0, 84.60, 84.0, 83.3, 51.6, 49.1, 40.0, 28.20;  $^{19}\text{F}$  NMR (564 MHz,  $\text{CDCl}_3$ )  $\delta$  -76.4 (s, 3F); HR-ESI-MS ( $m/z$ ): calcd. for  $\text{C}_{24}\text{H}_{22}\text{BrF}_3\text{N}_2\text{O}_4\text{SNa}$   $[\text{M} + \text{Na}]^+$ , 593.0328, found 593.0331.

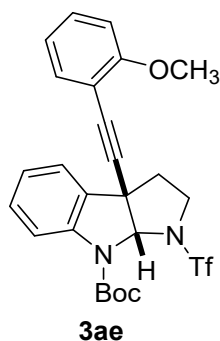

Prepared according to the general procedure C, **3ae** was isolated as pale solids (148.8 mg, 95% yield) by flash column chromatography (petroleum ether/ethyl acetate = 25/1, V/V).  $^1\text{H}$  NMR (600 MHz,  $\text{CDCl}_3$ )  $\delta$  7.74 (br. s, 1H), 7.38 (d,  $J = 7.6$ , 1H), 7.35 – 7.26 (m, 3H), 7.14 (td,  $J = 7.6, 0.8$  Hz, 1H), 6.87 (td,  $J = 7.6, 0.8$  Hz, 1H), 6.85 (d,  $J = 8.4$ , 1H), 6.53 (s, 1H), 3.96 (dd,  $J = 11.4, 7.1$  Hz, 1H), 3.84 (s, 3H), 3.04 (td,  $J = 11.4, 4.6$  Hz, 1H), 2.70 (td,  $J = 12.6, 7.1$  Hz, 1H), 2.61 (dd,  $J = 12.6, 4.6$  Hz, 1H), 1.59 (s, 9H);  $^{13}\text{C}$  NMR (150 MHz,  $\text{CDCl}_3$ )  $\delta$  160.4, 151.8, 141.9, 133.7, 131.6, 130.3, 129.7, 124.6, 123.6, 120.5, 119.8 (q,  $J_{\text{CF}} = 320.7$  Hz), 117.0, 111.6, 110.9, 91.4, 84.1, 83.2, 82.1, 55.9, 51.8, 49.1, 40.6, 28.2;  $^{19}\text{F}$  NMR (564 MHz,  $\text{CDCl}_3$ )  $\delta$  -76.5 (s, 3F); HR-ESI-MS ( $m/z$ ): calcd. for  $\text{C}_{25}\text{H}_{25}\text{F}_3\text{N}_2\text{O}_5\text{SNa}$   $[\text{M} + \text{Na}]^+$ , 545.1328, found 545.1327.

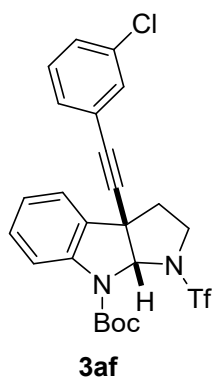

Prepared according to the general procedure **C**, **3af** was isolated as pale solids (151.5 mg, 96% yield) by flash column chromatography (petroleum ether/ethyl acetate = 30/1, V/V).  $^1\text{H}$  NMR (600 MHz,  $\text{CDCl}_3$ )  $\delta$  7.74 (br. s, 1H), 7.40 – 7.26 (m, 5H), 7.23 (t,  $J = 7.8$  Hz, 1H), 7.16 (t,  $J = 7.6$  Hz, 1H), 6.50 (s, 1H), 3.97 (dd,  $J = 11.4, 7.1$  Hz, 1H), 3.04 (td,  $J = 11.4, 4.6$  Hz, 1H), 2.65 (td,  $J = 12.6, 7.1$  Hz, 1H), 2.59 (dd,  $J = 12.5, 4.6$  Hz, 1H), 1.59 (s, 9H);  $^{13}\text{C}$  NMR (150 MHz,  $\text{CDCl}_3$ )  $\delta$  151.7, 141.8, 134.3, 131.8, 131.0, 130.0, 129.7, 129.1, 124.7, 123.9, 123.5, 119.8 (q,  $J_{\text{CF}} = 320.7$  Hz), 117.0, 88.6, 84.3, 83.9, 83.5, 51.3, 49.0, 40.6, 28.2;  $^{19}\text{F}$  NMR (564 MHz,  $\text{CDCl}_3$ )  $\delta$  -76.5 (s, 3F); HR-ESI-MS ( $m/z$ ): calcd. for  $\text{C}_{24}\text{H}_{22}\text{ClF}_3\text{N}_2\text{O}_4\text{SNa}$  [ $\text{M} + \text{Na}$ ] $^+$ , 549.0833, found 549.0837.

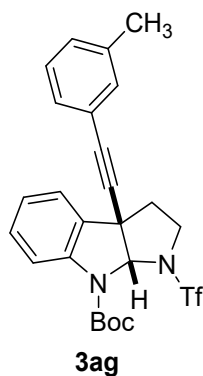

Prepared according to the general procedure **C**, **3ag** was isolated as pale solids (14.3 mg, 95% yield) by flash column chromatography (petroleum ether/ethyl acetate = 30/1, V/V).  $^1\text{H}$  NMR (600 MHz,  $\text{CDCl}_3$ )  $\delta$  7.75 (br. s, 1H), 7.38 – 7.32 (m, 2H), 7.23 (s, 1H), 7.21 – 7.13 (m, 4H), 6.51 (s, 1H), 3.97 (dd,  $J = 11.4, 7.0$  Hz, 1H), 3.04 (td,  $J = 11.4, 4.6$  Hz, 1H), 2.66 (td,  $J = 12.6, 7.0$  Hz, 1H), 2.60 (dd,  $J = 12.6, 4.6$  Hz, 1H), 2.32 (s, 3H), 1.60 (s, 9H);  $^{13}\text{C}$  NMR (150 MHz,  $\text{CDCl}_3$ )  $\delta$  151.8, 141.8, 138.2, 132.5, 131.4, 129.8,

129.7, 128.9, 128.3, 124.7, 123.5, 122.0, 119.8 (q,  $J_{CF} = 320.6$  Hz), 117.0, 87.0, 85.8, 84.0, 83.3, 51.4, 49.1, 40.6, 28.2, 21.3;  $^{19}\text{F}$  NMR (564 MHz,  $\text{CDCl}_3$ )  $\delta$  -76.5 (s, 3F); calcd. for  $\text{C}_{25}\text{H}_{25}\text{ClF}_3\text{N}_2\text{O}_4\text{SNa}$   $[\text{M} + \text{Na}]^+$ , 529.1379, found 529.1376.

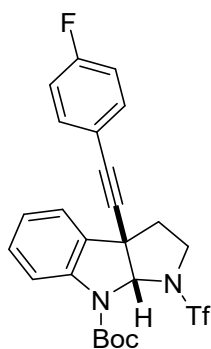

**3ah**

Prepared according to the general procedure **C**, **3ah** was isolated as pale solids (148.4 mg, 97% yield) by flash column chromatography (petroleum ether/ethyl acetate = 30/1, V/V).  $^1\text{H}$  NMR (600 MHz,  $\text{CDCl}_3$ )  $\delta$  7.74 (br. s, 1H), 7.40 – 7.31 (m, 4H), 7.15 (t,  $J = 7.5$  Hz, 1H), 6.99 (t,  $J = 8.6$  Hz, 2H), 6.50 (s, 1H), 3.97 (dd,  $J = 11.4, 7.0$  Hz, 1H), 3.03 (td,  $J = 11.4, 4.6$  Hz, 1H), 2.65 (td,  $J = 12.5, 7.0$  Hz, 1H), 2.59 (dd,  $J = 12.5, 4.6$  Hz, 1H), 1.59 (s, 9H);  $^{13}\text{C}$  NMR (150 MHz,  $\text{CDCl}_3$ )  $\delta$  162.8 (d,  $J_{CF} = 248.7$  Hz), 151.7, 141.8, 133.8 (d,  $J_{CF} = 8.3$  Hz), 131.3, 129.8, 124.7, 123.5, 119.8 (q,  $J_{CF} = 320.1$  Hz), 118.3, 117.0, 115.8 (d,  $J_{CF} = 22.1$  Hz), 87.1, 84.6, 83.9, 83.4, 51.3, 49.0, 40.6, 28.2;  $^{19}\text{F}$  NMR (564 MHz,  $\text{CDCl}_3$ )  $\delta$  -76.5 (s, 3F), -110.2 (s, 1F); HR-ESI-MS ( $m/z$ ): calcd. for  $\text{C}_{24}\text{H}_{22}\text{F}_4\text{N}_2\text{O}_4\text{SNa}$   $[\text{M} + \text{Na}]^+$ , 533.1129, found 533.1128.

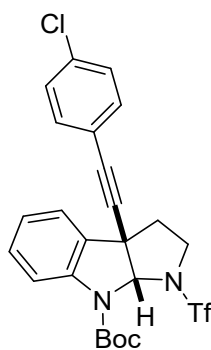

**3ai**

Prepared according to the general procedure **C**, **3ai** was isolated as pale solids (146.8

mg, 93% yield) by flash column chromatography (petroleum ether/ethyl acetate = 30/1, V/V). <sup>1</sup>H NMR (600 MHz, CDCl<sub>3</sub>) δ 7.74 (br. s, 1H), 7.37 – 7.31 (m, 4H), 7.29 – 7.26 (m, 2H), 7.15 (td, *J* = 7.5, 0.8 Hz, 1H), 6.50 (s, 1H), 3.97 (dd, *J* = 11.4, 7.0 Hz, 1H), 3.03 (td, *J* = 11.4, 4.6 Hz, 1H), 2.65 (td, *J* = 12.5, 7.0 Hz, 1H), 2.59 (dd, *J* = 12.5, 4.6 Hz, 1H), 1.59 (s, 9H); <sup>13</sup>C NMR (150 MHz, CDCl<sub>3</sub>) δ 151.7, 141.8, 135.0, 133.1, 132.7, 129.9, 128.8, 124.7, 123.6, 120.7, 119.8 (q, *J*<sub>CF</sub> = 320.4 Hz), 117.0, 88.4, 84.6, 83.9, 83.5, 51.5, 49.0, 40.5, 28.2; <sup>19</sup>F NMR (564 MHz, CDCl<sub>3</sub>) δ -76.5 (s, 3F); HR-ESI-MS (*m/z*): calcd. for C<sub>24</sub>H<sub>22</sub>ClF<sub>3</sub>N<sub>2</sub>O<sub>4</sub>SNa [M + Na]<sup>+</sup>, 549.0833, found 549.0835.

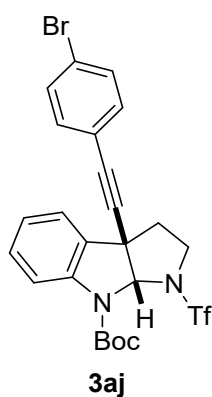

Prepared according to the general procedure C, **3aj** was isolated as pale solids (155.6 mg, 91% yield) by flash column chromatography (petroleum ether/ethyl acetate = 30/1, V/V). <sup>1</sup>H NMR (600 MHz, CDCl<sub>3</sub>) δ 7.74 (br. s, 1H), 7.46 – 7.41 (m, 2H), 7.34 (t, *J* = 8.2 Hz, 2H), 7.27 – 7.23 (m, 2H), 7.15 (t, *J* = 7.5 Hz, 1H), 6.50 (s, 1H), 3.96 (dd, *J* = 11.4, 7.0 Hz, 1H), 3.03 (td, *J* = 11.4, 4.7 Hz, 1H), 2.65 (td, *J* = 12.5, 7.0 Hz, 1H), 2.59 (dd, *J* = 12.5, 4.7 Hz, 1H), 1.59 (s, 9H); <sup>13</sup>C NMR (150 MHz, CDCl<sub>3</sub>) δ 151.7, 141.8, 133.3, 131.7, 131.1, 129.9, 124.7, 123.5, 123.2, 121.2, 119.8 (q, *J*<sub>CF</sub> = 320.3 Hz), 117.0, 88.6, 84.7, 83.8, 83.4, 51.4, 49.0, 40.6, 28.2; <sup>19</sup>F NMR (564 MHz, CDCl<sub>3</sub>) δ -76.5 (s, 3F); HR-ESI-MS (*m/z*): calcd. for C<sub>24</sub>H<sub>22</sub>BrF<sub>3</sub>N<sub>2</sub>O<sub>4</sub>SNa [M + Na]<sup>+</sup>, 593.0328, found 593.0328.

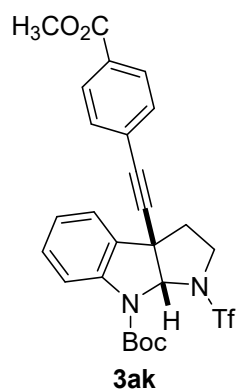

Prepared according to the general procedure **C**, **3ak** was isolated as pale solids (153.5 mg, 93% yield) by flash column chromatography (petroleum ether/ethyl acetate = 20/1, V/V).  $^1\text{H}$  NMR (600 MHz,  $\text{CDCl}_3$ )  $\delta$  7.97 (d,  $J = 8.2$  Hz, 2H), 7.74 (br. s, 1H), 7.45 (d,  $J = 8.2$  Hz, 2H), 7.38 – 7.32 (m, 2H), 7.15 (t,  $J = 7.6$  Hz, 1H), 6.53 (s, 1H), 3.97 (dd,  $J = 11.4, 7.0$  Hz, 1H), 3.90 (s, 3H), 3.05 (td,  $J = 11.4, 4.6$  Hz, 1H), 2.67 (td,  $J = 12.5, 7.0$  Hz, 1H), 2.61 (dd,  $J = 12.5, 4.6$  Hz, 1H), 1.59 (s, 9H);  $^{13}\text{C}$  NMR (150 MHz,  $\text{CDCl}_3$ )  $\delta$  166.5, 151.7, 141.8, 131.8, 131.0, 130.2, 129.9, 129.6, 126.9, 124.7, 123.5, 119.8 (q,  $J_{\text{CF}} = 321.0$  Hz), 117.1, 90.3, 85.0, 83.9, 83.4, 52.3, 51.4, 49.0, 40.5, 28.2;  $^{19}\text{F}$  NMR (564 MHz,  $\text{CDCl}_3$ )  $\delta$  -76.5 (s, 3F); HR-ESI-MS ( $m/z$ ): calcd. for  $\text{C}_{26}\text{H}_{25}\text{F}_3\text{N}_2\text{O}_6\text{SNa}$  [ $\text{M} + \text{Na}$ ] $^+$ , 573.1278, found 573.1278.

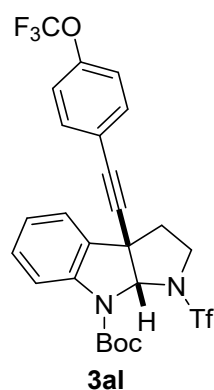

Prepared according to the general procedure **C**, **3al** was isolated as pale solids (164.2 mg, 95% yield) by flash column chromatography (petroleum ether/ethyl acetate = 25/1, V/V).  $^1\text{H}$  NMR (600 MHz,  $\text{CDCl}_3$ )  $\delta$  7.75 (s, 1H), 7.45 – 7.39 (m, 2H), 7.36 – 7.392 (m, 2H), 7.17 – 7.13 (m, 3H), 6.51 (s, 1H), 3.97 (dd,  $J = 11.4, 7.0$  Hz, 1H), 3.04 (td,  $J = 11.4, 4.6$  Hz, 1H), 2.65 (td,  $J = 12.5, 7.0$  Hz, 1H), 2.59 (dd,  $J = 12.5, 4.6$  Hz, 1H),

1.59 (s, 9H);  $^{13}\text{C}$  NMR (150 MHz,  $\text{CDCl}_3$ )  $\delta$  151.7, 149.4, 141.9, 133.5, 131.1, 129.9, 124.7, 123.5, 121.0, 120.9, 120.5 (q,  $J = 256.1$  Hz), 119.8 (q,  $J_{\text{CF}} = 320.0$  Hz), 117.1, 88.3, 84.3, 83.9, 83.5, 51.3, 49.0, 40.6, 28.2;  $^{19}\text{F}$  NMR (564 MHz,  $\text{CDCl}_3$ )  $\delta$  -57.9 (s, 3F), -76.5 (s, 3F); HR-ESI-MS ( $m/z$ ): calcd. for  $\text{C}_{25}\text{H}_{22}\text{F}_6\text{N}_2\text{O}_5\text{SNa}$   $[\text{M} + \text{Na}]^+$ , 599.1046, found 599.1045.

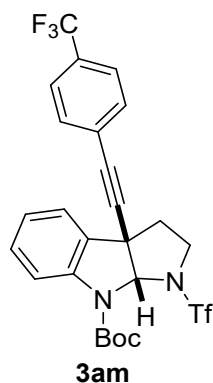

Prepared according to the general procedure **C**, **3am** was isolated as pale solids (158.0 mg, 94% yield) by flash column chromatography (petroleum ether/ethyl acetate = 30/1, V/V).  $^1\text{H}$  NMR (600 MHz,  $\text{CDCl}_3$ )  $\delta$  7.75 (br. s, 1H), 7.56 (d,  $J = 8.2$  Hz, 2H), 7.50 (d,  $J = 8.2$  Hz, 2H), 7.38 – 7.31 (m, 2H), 7.16 (td,  $J = 7.6, 0.7$  Hz, 1H), 6.53 (s, 1H), 3.98 (dd,  $J = 11.4, 7.0$  Hz, 1H), 3.05 (td,  $J = 11.4, 4.7$  Hz, 1H), 2.67 (td,  $J = 12.5, 7.0$  Hz, 1H), 2.61 (dd,  $J = 12.5, 4.7$  Hz, 1H), 1.59 (s, 9H);  $^{13}\text{C}$  NMR (150 MHz,  $\text{CDCl}_3$ )  $\delta$  151.7, 141.9, 132.2, 130.9, 130.0, 126.1, 125.4 (q,  $J = 3.9$  Hz), 124.8, 123.9 (q,  $J = 270.3$  Hz), 123.5, 119.8 (q,  $J_{\text{CF}} = 320.3$  Hz), 117.1, 89.9, 84.4, 83.9, 83.59, 51.3, 49.0, 40.6, 28.2;  $^{19}\text{F}$  NMR (564 MHz,  $\text{CDCl}_3$ )  $\delta$  -63.0 (s, 3F), -76.5 (s, 3F); HR-ESI-MS ( $m/z$ ): calcd. for  $\text{C}_{25}\text{H}_{22}\text{F}_6\text{N}_2\text{O}_4\text{SNa}$   $[\text{M} + \text{Na}]^+$ , 583.1097, found 583.1101.



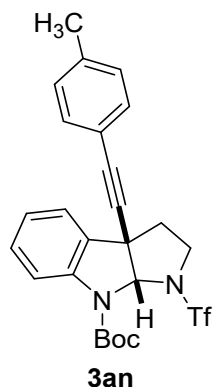

Prepared according to the general procedure **C**, **3an** was isolated as pale solids (141.2 mg, 93% yield) by flash column chromatography (petroleum ether/ethyl acetate = 30/1, V/V).  $^1\text{H}$  NMR (600 MHz,  $\text{CDCl}_3$ )  $\delta$  7.75 (br. s, 1H), 7.36 (d,  $J = 7.5$  Hz, 1H), 7.34 (t,  $J = 7.5$  Hz, 1H), 7.29 (d,  $J = 8.0$  Hz, 2H), 7.15 (td,  $J = 7.5, 0.7$  Hz, 1H), 7.11 (d,  $J = 8.0$  Hz, 2H), 6.50 (s, 1H), 3.96 (dd,  $J = 11.4, 7.0$  Hz, 1H), 3.04 (td,  $J = 11.4, 4.6$  Hz, 1H), 2.66 (td,  $J = 12.5, 7.0$  Hz, 1H), 2.59 (dd,  $J = 12.5, 4.6$  Hz, 1H), 2.34 (s, 3H), 1.59 (s, 9H);  $^{13}\text{C}$  NMR (150 MHz,  $\text{CDCl}_3$ )  $\delta$  151.8, 141.8, 139.0, 131.8, 131.5, 129.7, 129.2, 124.6, 123.5, 119.8 (q,  $J_{\text{CF}} = 320.4$  Hz), 119.2, 117.0, 86.7, 85.8, 84.0, 83.30, 51.5, 49.1, 40.6, 28.2, 21.6;  $^{19}\text{F}$  NMR (564 MHz,  $\text{CDCl}_3$ )  $\delta$  -76.5 (s, 3F); HR-ESI-MS ( $m/z$ ): calcd. for  $\text{C}_{25}\text{H}_{25}\text{F}_3\text{N}_2\text{O}_4\text{SNa}$  [ $\text{M} + \text{Na}$ ] $^+$ , 529.1379, found 529.1379.

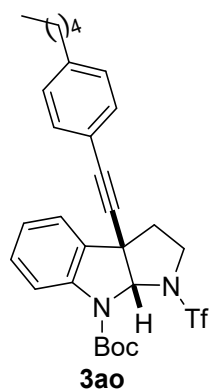

Prepared according to the general procedure **C**, **3ao** was isolated as pale solids (150.1 mg, 89% yield) by flash column chromatography (petroleum ether/ethyl acetate = 30/1, V/V).  $^1\text{H}$  NMR (600 MHz,  $\text{CDCl}_3$ )  $\delta$  7.75 (br. s, 1H), 7.35 (d,  $J = 7.6$  Hz, 1H), 7.33 (t,  $J = 7.6$  Hz, 1H), 7.30 (d,  $J = 8.1$  Hz, 2H), 7.14 (t,  $J = 7.6$  Hz, 1H), 7.11 (d,  $J = 8.1$  Hz, 2H), 6.49 (s, 1H), 3.96 (dd,  $J = 11.4, 7.0$  Hz, 1H), 3.03 (td,  $J = 11.4, 4.6$  Hz, 1H), 2.66

(td,  $J = 12.5, 7.0$  Hz, 1H), 2.61 – 2.56 (m, 3H), 1.59 (s, 9H), 1.58 – 1.55 (m, 2H), 1.34 – 1.26 (m, 4H), 0.88 (t,  $J = 7.1$  Hz, 3H);  $^{13}\text{C}$  NMR (150 MHz,  $\text{CDCl}_3$ )  $\delta$  151.8, 144.1, 141.9, 131.89, 131.6, 129.7, 128.6, 124.7, 123.5, 119.8 (q,  $J_{\text{CF}} = 320.0$  Hz), 119.4, 117.0, 86.7, 85.9, 84.1, 83.3, 51.5, 49.1, 40.6, 36.0, 31.5, 31.0, 28.2, 22.6, 14.1;  $^{19}\text{F}$  NMR (564 MHz,  $\text{CDCl}_3$ )  $\delta$  -76.5 (s, 3F); HR-ESI-MS ( $m/z$ ): calcd. for  $\text{C}_{29}\text{H}_{33}\text{F}_3\text{N}_2\text{O}_4\text{SNa}$   $[\text{M} + \text{Na}]^+$ , 585.2005, found 585.2007.

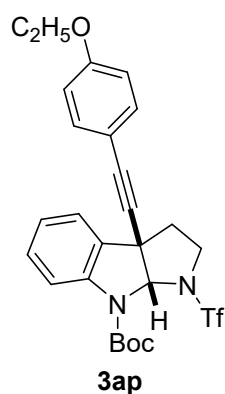

Prepared according to the general procedure **C**, **3ap** was isolated as pale solids (148.0 mg, 92% yield) by flash column chromatography (petroleum ether/ethyl acetate = 25/1, V/V).  $^1\text{H}$  NMR (600 MHz,  $\text{CDCl}_3$ )  $\delta$  7.74 (br. s, 1H), 7.35 (d,  $J = 7.5$  Hz, 1H), 7.34 – 7.30 (m, 3H), 7.14 (td,  $J = 7.5, 0.7$  Hz, 1H), 6.81 (td,  $J = 8.4, 2.0$  Hz, 2H), 6.49 (s, 1H), 4.02 (q,  $J = 7.0$  Hz, 2H), 3.95 (dd,  $J = 11.4, 7.0$  Hz, 1H), 3.03 (td,  $J = 11.4, 4.6$  Hz, 1H), 2.65 (td,  $J = 12.5, 7.0$  Hz, 1H), 2.58 (dd,  $J = 12.5, 4.6$  Hz, 1H), 1.59 (s, 9H), 1.40 (t,  $J = 7.0$  Hz, 3H);  $^{13}\text{C}$  NMR (150 MHz,  $\text{CDCl}_3$ )  $\delta$  159.4, 151.8, 141.8, 133.3, 131.6, 129.7, 124.6, 123.5, 119.8 (q,  $J_{\text{CF}} = 319.5$  Hz), 117.0, 114.6, 114.1, 85.9, 85.7, 84.0, 83.3, 63.7, 51.5, 49.1, 40.6, 28.2, 14.8;  $^{19}\text{F}$  NMR (564 MHz,  $\text{CDCl}_3$ )  $\delta$  -76.5 (s, 3F); HR-ESI-MS ( $m/z$ ): calcd. for  $\text{C}_{26}\text{H}_{27}\text{F}_3\text{N}_2\text{O}_5\text{SNa}$   $[\text{M} + \text{Na}]^+$ , 559.1485, found 559.1493.

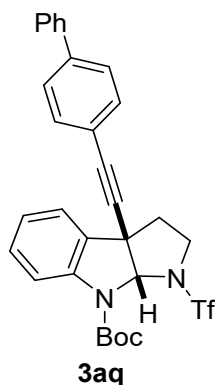

Prepared according to the general procedure **C**, **3aq** was isolated as pale solids (168.7 mg, 99% yield) by flash column chromatography (petroleum ether/ethyl acetate = 30/1, V/V).  $^1\text{H}$  NMR (600 MHz,  $\text{CDCl}_3$ )  $\delta$  7.76 (br. s, 1H), 7.59 – 7.53 (m, 4H), 7.49 – 7.41 (m, 4H), 7.40 – 7.33 (m, 3H), 7.17 (td,  $J = 7.5, 0.8$  Hz, 1H), 6.54 (s, 1H), 3.98 (dd,  $J = 11.4, 7.0$  Hz, 1H), 3.06 (td,  $J = 11.4, 4.6$  Hz, 1H), 2.69 (td,  $J = 12.5, 7.0$  Hz, 1H), 2.62 (dd,  $J = 12.5, 4.6$  Hz, 1H), 1.61 (s, 9H);  $^{13}\text{C}$  NMR (150 MHz,  $\text{CDCl}_3$ )  $\delta$  151.8, 141.9, 141.6, 140.3, 132.3, 131.4, 129.8, 129.0, 127.9, 127.2, 127.1, 124.7, 123.6, 121.16, 119.8 (q,  $J_{\text{CF}} = 320.1$  Hz), 117.1, 88.0, 85.6, 84.0, 83.4, 51.5, 49.1, 40.6, 28.2;  $^{19}\text{F}$  NMR (564 MHz,  $\text{CDCl}_3$ )  $\delta$  -76.4 (s, 3F); HR-ESI-MS ( $m/z$ ): calcd. for  $\text{C}_{30}\text{H}_{27}\text{F}_3\text{N}_2\text{O}_4\text{SNa}$  [ $\text{M} + \text{Na}$ ] $^+$ , 591.1536, found 591.1532.

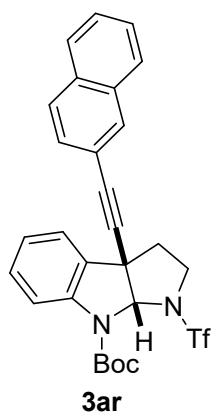

Prepared according to the general procedure **C**, **3ar** was isolated as pale solids (152.9 mg, 94% yield) by flash column chromatography (petroleum ether/ethyl acetate = 30/1, V/V).  $^1\text{H}$  NMR (600 MHz,  $\text{CDCl}_3$ )  $\delta$  7.94 (s, 1H), 7.84 – 7.73 (m, 4H), 7.52 – 7.47 (m, 2H), 7.43 (dd,  $J = 8.5, 1.5$  Hz, 1H), 7.41 (d,  $J = 7.6$  Hz, 1H), 7.36 (td,  $J = 7.6$  Hz, 1.2, 1H), 7.18 (td,  $J = 7.6, 0.8$  Hz, 1H), 6.57 (s, 1H), 3.99 (dd,  $J = 11.4, 7.0$  Hz, 1H), 3.07

(td,  $J = 11.4, 4.6$  Hz, 1H), 2.72 (td,  $J = 12.6, 7.0$  Hz, 1H), 2.64 (dd,  $J_{CF} = 12.6, 4.6$  Hz, 1H), 1.61 (s, 9H);  $^{13}\text{C}$  NMR (150 MHz,  $\text{CDCl}_3$ )  $\delta$  151.8, 141.9, 133.1, 133.0, 132.0, 131.4, 129.8, 128.4, 128.2, 127.9, 127.0, 126.8, 124.7, 123.6, 119.8 (q,  $J = 321.0$  Hz), 119.5, 117.1, 87.7, 86.1, 84.0, 83.4, 51.5, 49.1, 40.7, 28.2;  $^{19}\text{F}$  NMR (564 MHz,  $\text{CDCl}_3$ )  $\delta$  -76.4 (s, 3F); HR-ESI-MS ( $m/z$ ): calcd. for  $\text{C}_{28}\text{H}_{25}\text{F}_3\text{N}_2\text{O}_4\text{SNa}$   $[\text{M} + \text{Na}]^+$ , 565.1379, found 565.1384.

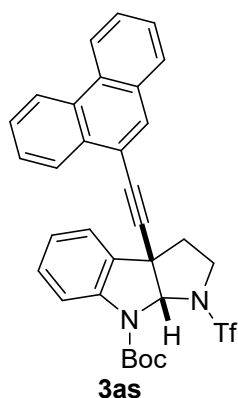

Prepared according to the general procedure **C**, **3as** was isolated as pale solids (161.7 mg, 91% yield) by flash column chromatography (petroleum ether/ethyl acetate = 30/1, V/V).  $^1\text{H}$  NMR (600 MHz,  $\text{CDCl}_3$ )  $\delta$  8.67 (d,  $J = 8.2$  Hz, 1H), 8.63 (d,  $J = 8.2$  Hz, 1H), 8.22 (d,  $J = 7.9$  Hz, 1H), 7.96 (s, 1H), 7.83 (m, 2H), 7.71 – 7.63 (m, 3H), 7.60 (t,  $J = 7.4$  Hz, 1H), 7.48 (d,  $J = 7.4$  Hz, 1H), 7.39 (t,  $J = 7.9$  Hz, 1H), 7.22 (t,  $J = 7.4$  Hz, 1H), 6.67 (s, 1H), 4.04 (dd,  $J = 11.4, 7.1$  Hz, 1H), 3.14 (td,  $J = 11.4, 4.4$  Hz, 1H), 2.82 (td,  $J = 12.5, 7.1$  Hz, 1H), 2.74 (dd,  $J = 12.5, 4.4$  Hz, 1H), 1.62 (s, 9H);  $^{13}\text{C}$  NMR (150 MHz,  $\text{CDCl}_3$ )  $\delta$  151.8, 142.0, 132.5, 131.4, 131.1, 131.0, 130.6, 130.2, 129.9, 128.7, 127.9, 127.3, 127.2, 126.6, 124.8, 123.5, 123.0, 122.8, 119.9 (q,  $J_{CF} = 319.5$  Hz), 118.5, 117.3, 91.8, 84.3, 84.2, 83.4, 51.8, 49.2, 40.4, 28.2;  $^{19}\text{F}$  NMR (564 MHz,  $\text{CDCl}_3$ )  $\delta$  -76.4 (s, 3F); HR-ESI-MS ( $m/z$ ): calcd. for  $\text{C}_{32}\text{H}_{27}\text{F}_3\text{N}_2\text{O}_6\text{SNa}$   $[\text{M} + \text{Na}]^+$ , 615.1536, found 615.1538.

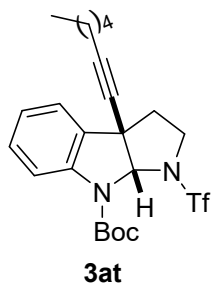

Prepared according to the general procedure **C**, **3at** was isolated as pale solids (121.1 mg, 83% yield) by flash column chromatography (petroleum ether/ethyl acetate = 40/1, V/V).  $^1\text{H}$  NMR (600 MHz,  $\text{CDCl}_3$ )  $\delta$  7.70 (br. s, 1H), 7.29 (t,  $J = 7.6$  Hz, 1H), 7.27 (d,  $J = 7.6$  Hz, 1H), 7.11 (t,  $J = 7.6$  Hz, 1H), 6.34 (s, 1H), 3.89 (dd,  $J = 11.4, 6.6$  Hz, 1H), 2.97 (td,  $J = 11.4, 5.2$  Hz, 1H), 2.57 – 2.43 (m, 2H), 2.15 (t,  $J = 7.2$  Hz, 2H), 1.57 (s, 9H), 1.51 – 1.42 (m, 2H), 1.33 – 1.27 (m, 4H), 0.88 (t,  $J = 7.0$  Hz, 3H);  $^{13}\text{C}$  NMR (150 MHz,  $\text{CDCl}_3$ )  $\delta$  151.8, 141.7, 132.1, 129.5, 124.5, 123.3, 119.8 (q,  $J_{\text{CF}} = 319.2$  Hz), 117.0, 86.6, 84.3, 83.1, 78.6, 51.0, 49.1, 40.4, 31.1, 28.2, 28.2, 22.2, 18.9, 14.1;  $^{19}\text{F}$  NMR (564 MHz,  $\text{CDCl}_3$ )  $\delta$  -76.5 (s, 3F); HR-ESI-MS ( $m/z$ ): calcd. for  $\text{C}_{23}\text{H}_{29}\text{F}_3\text{N}_2\text{O}_4\text{SNa}$  [ $\text{M} + \text{Na}$ ] $^+$ , 509.1692, found 509.1693.

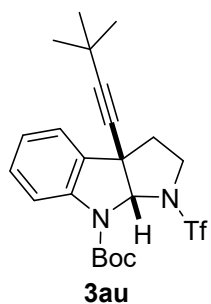

Prepared according to the general procedure **C**, **3au** was isolated as pale solids (126.1 mg, 89% yield) by flash column chromatography (petroleum ether/ethyl acetate = 40/1, V/V).  $^1\text{H}$  NMR (600 MHz,  $\text{CDCl}_3$ )  $\delta$  7.68 (br. s, 1H), 7.29 (t,  $J = 7.6$  Hz, 1H), 7.25 (d,  $J = 7.6$  Hz, 1H), 7.11 (t,  $J = 7.6$  Hz, 1H), 6.32 (s, 1H), 3.88 (dd,  $J = 11.4, 6.6$  Hz, 1H), 2.96 (td,  $J = 11.4, 5.2$  Hz, 1H), 2.57 – 2.40 (m, 2H), 1.57 (s, 9H), 1.16 (s, 9H);  $^{13}\text{C}$  NMR (150 MHz,  $\text{CDCl}_3$ )  $\delta$  151.9, 141.7, 132.4, 129.4, 124.6, 123.3, 119.9 (q,  $J_{\text{CF}} = 321.0$  Hz), 117.0, 94.6, 84.6, 83.1, 51.0, 49.0, 40.7, 31.0, 28.2, 27.6;  $^{19}\text{F}$  NMR (564 MHz,  $\text{CDCl}_3$ )  $\delta$  -76.5 (s, 3F); HR-ESI-MS ( $m/z$ ): calcd. for  $\text{C}_{22}\text{H}_{27}\text{F}_3\text{N}_2\text{O}_4\text{SNa}$  [ $\text{M} + \text{Na}$ ] $^+$ , 495.1536, found 495.1531.

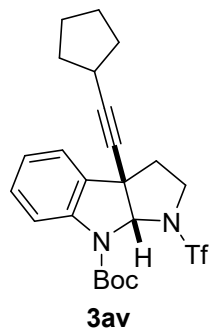

Prepared according to the general procedure **C**, **3av** was isolated as pale solids (126.4 mg, 87% yield) by flash column chromatography (petroleum ether/ethyl acetate = 40/1, V/V).  $^1\text{H}$  NMR (600 MHz,  $\text{CDCl}_3$ )  $\delta$  7.68 (br. s, 1H), 7.29 (td,  $J = 7.6, 1.0$  Hz, 1H), 7.27 – 7.25 (m, 1H), 7.29 (td,  $J = 7.6, 1.0$  Hz, 1H), 6.33 (s, 1H), 3.88 (dd,  $J = 11.4, 6.6$  Hz, 1H), 2.96 (td,  $J = 11.4, 5.2$  Hz, 1H), 2.60 – 2.54 (m, 1H), 2.53 – 2.44 (m, 2H), 1.91 – 1.80 (m, 2H), 1.72 – 1.62 (m, 2H), 1.57 (s, 9H), 1.55 – 1.48 (m, 4H);  $^{13}\text{C}$  NMR (150 MHz,  $\text{CDCl}_3$ )  $\delta$  151.9, 141.7, 132.3, 129.5, 124.6, 123.3, 119.8 (q,  $J_{\text{CF}} = 319.5$  Hz), 117.0, 90.7, 84.4, 83.1, 78.1, 51.1, 49.1, 40.6, 33.9, 30.3, 28.2, 25.1;  $^{19}\text{F}$  NMR (564 MHz,  $\text{CDCl}_3$ )  $\delta$  -76.5 (s, 3F); HR-ESI-MS ( $m/z$ ): calcd. for  $\text{C}_{23}\text{H}_{27}\text{F}_3\text{N}_2\text{O}_4\text{SNa}$  [ $\text{M} + \text{Na}$ ] $^+$ , 507.1536, found 507.1534.

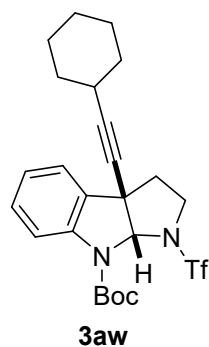

Prepared according to the general procedure **C**, **3aw** was isolated as pale solids (125.5 mg, 84% yield) by flash column chromatography (petroleum ether/ethyl acetate = 40/1, V/V).  $^1\text{H}$  NMR (600 MHz,  $\text{CDCl}_3$ )  $\delta$  7.69 (br. s, 1H), 7.29 (t,  $J = 7.6$  Hz, 1H), 7.26 (d,  $J = 7.6$  Hz, 1H), 7.11 (t,  $J = 7.6$  Hz, 1H), 6.34 (s, 1H), 3.88 (dd,  $J = 11.4, 6.6$  Hz, 1H), 2.97 (td,  $J = 11.4, 5.4$  Hz, 1H), 2.56 – 2.44 (m, 2H), 2.39 – 2.31 (m, 1H), 1.74 – 1.68 (m, 2H), 1.66 – 1.61 (m, 2H), 1.57 (s, 9H), 1.51 – 1.44 (m, 1H), 1.41 – 1.35 (m, 2H), 1.32 – 1.26 (m, 3H);  $^{13}\text{C}$  NMR (150 MHz,  $\text{CDCl}_3$ )  $\delta$  151.9, 141.7, 132.3, 129.5, 124.6,

123.3, 119.9 (q,  $J_{CF} = 319.5$  Hz), 117.0, 90.5, 84.5, 83.1, 78.8, 51.1, 49.1, 40.5, 32.5, 29.1, 28.2, 26.0, 24.8;  $^{19}\text{F}$  NMR (564 MHz,  $\text{CDCl}_3$ )  $\delta$  -76.5 (s, 3F); HR-ESI-MS ( $m/z$ ): calcd. for  $\text{C}_{24}\text{H}_{29}\text{F}_3\text{N}_2\text{O}_4\text{SNa}$  [ $\text{M} + \text{Na}$ ] $^+$ , 521.1692, found 521.1691.

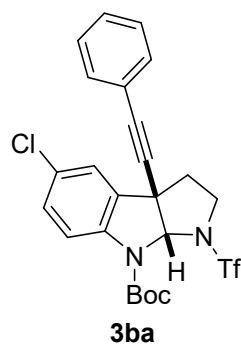

Prepared according to the general procedure **C**, **3ba** was isolated as pale solids (153.1 mg, 97% yield) by flash column chromatography (petroleum ether/ethyl acetate = 30/1, V/V).  $^1\text{H}$  NMR (600 MHz,  $\text{CDCl}_3$ )  $\delta$  7.70 (br. s, 1H), 7.43 – 7.39 (m, 2H), 7.35 – 7.28 (m, 5H), 6.49 (s, 1H), 3.98 (dd,  $J = 11.4, 7.1$  Hz, 1H), 3.06 (td,  $J = 11.4, 4.6$  Hz, 1H), 2.66 (td,  $J = 12.6, 7.1$  Hz, 1H), 2.58 (dd,  $J = 12.6, 4.6$  Hz, 1H), 1.58 (s, 9H);  $^{13}\text{C}$  NMR (150 MHz,  $\text{CDCl}_3$ )  $\delta$  151.5, 140.5, 133.2, 131.9, 129.9, 129.7, 129.1, 128.5, 123.8, 122.0, 119.8 (q,  $J_{CF} = 320.6$  Hz), 118.1, 86.6, 86.2, 84.2, 83.8, 51.4, 49.0, 40.5, 28.2;  $^{19}\text{F}$  NMR (564 MHz,  $\text{CDCl}_3$ )  $\delta$  -76.4 (s, 3F); HR-ESI-MS ( $m/z$ ): calcd. for  $\text{C}_{24}\text{H}_{22}\text{ClF}_3\text{N}_2\text{O}_4\text{SNa}$  [ $\text{M} + \text{Na}$ ] $^+$ , 549.0833, found 549.0831.

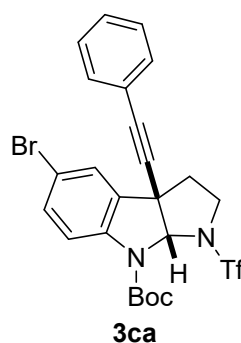

Prepared according to the general procedure **C**, **3ca** was isolated as pale solids (162.5 mg, 95% yield) by flash column chromatography (petroleum ether/ethyl acetate = 30/1, V/V).  $^1\text{H}$  NMR (600 MHz,  $\text{CDCl}_3$ )  $\delta$  7.65 (br. s, 1H), 7.48 (d,  $J = 1.9$  Hz, 1H), 7.44 (dd,  $J = 8.6, 1.9$  Hz, 1H), 7.43 – 7.39 (m, 2H), 7.35 – 7.29 (m, 3H), 6.48 (s, 1H), 3.98

(dd,  $J = 11.4, 7.1$  Hz, 1H), 3.06 (td,  $J = 11.4, 4.6$  Hz, 1H), 2.66 (td,  $J = 12.6, 7.1$  Hz, 1H), 2.58 (dd,  $J = 12.6, 4.6$  Hz, 1H), 1.58 (s, 9H);  $^{13}\text{C}$  NMR (150 MHz,  $\text{CDCl}_3$ )  $\delta$  151.5, 141.0, 133.5, 132.8, 131.9, 129.1, 128.5, 126.7, 121.9, 119.8 (q,  $J_{\text{CF}} = 320.1$  Hz), 118.5, 117.0, 86.6, 86.3, 84.2, 83.8, 51.3, 49.0, 40.5, 28.2;  $^{19}\text{F}$  NMR (564 MHz,  $\text{CDCl}_3$ )  $\delta$  -76.4 (s, 3F); HR-ESI-MS ( $m/z$ ): calcd. for  $\text{C}_{24}\text{H}_{22}\text{BrF}_3\text{N}_2\text{O}_4\text{SNa}$   $[\text{M} + \text{Na}]^+$ , 593.0328, found 593.0327.

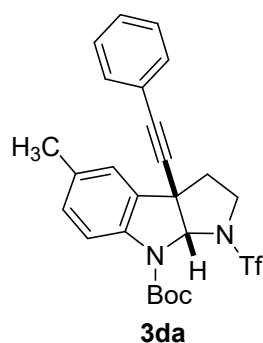

Prepared according to the general procedure **C**, **3da** was isolated as pale solids (141.2 mg, 93% yield) by flash column chromatography (petroleum ether/ethyl acetate = 30/1, V/V).  $^1\text{H}$  NMR (600 MHz,  $\text{CDCl}_3$ )  $\delta$  7.61 (br. s, 1H), 7.40 (dd,  $J = 7.6, 1.9$  Hz, 2H), 7.34 – 7.29 (m, 3H), 7.16 (s, 1H), 7.14 (d,  $J = 8.6$  Hz, 1H), 6.49 (s, 1H), 3.96 (dd,  $J = 11.4, 7.0$  Hz, 1H), 3.05 (td,  $J = 11.4, 4.6$  Hz, 1H), 2.65 (td,  $J = 12.5, 7.0$  Hz, 1H), 2.59 (dd,  $J = 12.5, 4.6$  Hz, 1H), 2.36 (s, 3H), 1.58 (s, 9H);  $^{13}\text{C}$  NMR (150 MHz,  $\text{CDCl}_3$ )  $\delta$  151.8, 139.6, 134.5, 131.9, 131.3, 130.4, 128.8, 128.4, 123.9, 122.3, 119.8 (q,  $J_{\text{CF}} = 321.0$  Hz), 116.8, 87.5, 85.5, 84.2, 83.1, 51.4, 49.0, 40.5, 28.2, 21.1;  $^{19}\text{F}$  NMR (564 MHz,  $\text{CDCl}_3$ )  $\delta$  -76.5 (s, 3F); HR-ESI-MS ( $m/z$ ): calcd. for  $\text{C}_{25}\text{H}_{25}\text{F}_3\text{N}_2\text{O}_4\text{SNa}$   $[\text{M} + \text{Na}]^+$ , 529.1379, found 529.1381.

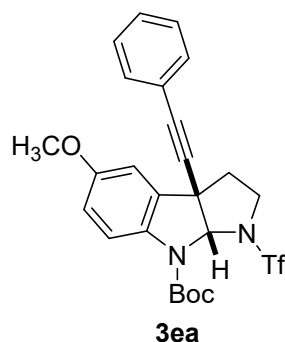



Prepared according to the general procedure C, **3aa** was isolated as pale solids (126.9 mg, 81% yield) by flash column chromatography (petroleum ether/ethyl acetate = 25/1, V/V). <sup>1</sup>H NMR (600 MHz, CDCl<sub>3</sub>) δ 7.65 (br. s, 1H), 7.39 (dd, *J* = 7.6, 1.9 Hz, 2H), 7.35 – 7.28 (m, 3H), 6.91 – 6.85 (m, 2H), 6.48 (s, 1H), 3.96 (dd, *J* = 11.4, 7.1 Hz, 1H), 3.82 (s, 3H), 3.06 (td, *J* = 11.4, 4.6 Hz, 1H), 2.64 (td, *J* = 12.5, 7.1 Hz, 1H), 2.58 (dd, *J* = 12.5, 4.6 Hz, 1H), 1.58 (s, 9H); <sup>13</sup>C NMR (150 MHz, CDCl<sub>3</sub>) δ 157.3, 151.9, 135.3, 132.6, 131.9, 128.9, 128.5, 122.2, 119.8 (q, *J*<sub>CF</sub> = 321.4 Hz), 117.9, 114.76 (s, 8H), 109.3, 87.1, 85.8, 84.3, 83.1, 56.0, 51.7, 49.0, 40.2, 28.2; <sup>19</sup>F NMR (564 MHz, CDCl<sub>3</sub>) δ -76.5 (s, 3F); HR-ESI-MS (*m/z*): calcd. for C<sub>25</sub>H<sub>25</sub>F<sub>3</sub>N<sub>2</sub>O<sub>5</sub>SNa [M + Na]<sup>+</sup>, 545.1328, found 545.1337.

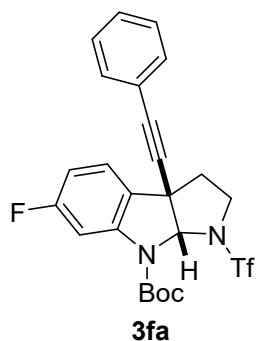

Prepared according to the general procedure C, **3fa** was isolated as pale solids (142.3 mg, 93% yield) by flash column chromatography (petroleum ether/ethyl acetate = 30/1, V/V). <sup>1</sup>H NMR (600 MHz, CDCl<sub>3</sub>) δ 7.50 (br. s, 1H), 7.41 – 7.37 (m, 2H), 7.35 – 7.27 (m, 4H), 6.84 (td, *J* = 8.5, 2.4 Hz, 1H), 6.50 (s, 1H), 3.98 (dd, *J* = 11.4, 7.0 Hz, 1H), 3.06 (td, *J* = 11.4, 4.6 Hz, 1H), 2.65 (td, *J* = 12.6, 7.0 Hz, 1H), 2.56 (dd, *J* = 12.6, 4.6 Hz, 1H), 1.59 (s, 9H); <sup>13</sup>C NMR (150 MHz, CDCl<sub>3</sub>) δ 164.7, 163.0, 151.4, 131.9, 129.0, 128.5, 126.9, 124.4 (d, *J*<sub>CF</sub> = 9.8 Hz), 122.1, 119.8 (q, *J*<sub>CF</sub> = 320.0 Hz), 111.5 (d, *J*<sub>CF</sub> = 23.4 Hz), 105.1 (d, *J*<sub>CF</sub> = 30.0 Hz), 87.2, 85.9, 84.6, 84.0, 51.0, 49.1, 40.8, 28.2; <sup>19</sup>F NMR (564 MHz, CDCl<sub>3</sub>) δ -76.5 (s, 3F), -110.8 (s, 1F); HR-ESI-MS (*m/z*): calcd. for C<sub>24</sub>H<sub>22</sub>F<sub>4</sub>N<sub>2</sub>O<sub>4</sub>SNa [M + Na]<sup>+</sup>, 533.1129, found 533.1128.

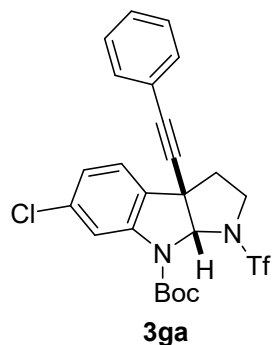

Prepared according to the general procedure **C**, **3ga** was isolated as pale solids (115.2 mg, 73% yield) by flash column chromatography (petroleum ether/ethyl acetate = 30/1, V/V).  $^1\text{H}$  NMR (400 MHz,  $\text{CDCl}_3$ )  $\delta$  7.73 (br. s, 1H), 7.34 – 7.29 (m, 2H), 7.27 – 7.18 (m, 4H), 7.05 (dd,  $J = 8.0, 1.9$  Hz, 1H), 6.42 (s, 1H), 3.91 (dd,  $J = 11.4, 7.0$  Hz, 1H), 2.98 (td,  $J = 11.4, 4.7$  Hz, 1H), 2.58 (td,  $J = 12.6, 7.0$  Hz, 1H), 2.49 (dd,  $J = 12.6, 4.7$  Hz, 1H), 1.52 (s, 9H);  $^{13}\text{C}$  NMR (100 MHz,  $\text{CDCl}_3$ )  $\delta$  151.4, 142.9, 135.7, 131.9, 129.9, 129.0, 128.5, 124.8, 124.4, 122.0, 119.7 (q,  $J_{\text{CF}} = 320.2$  Hz), 117.4, 86.8, 86.0, 84.3, 84.0, 51.1, 49.1, 40.6, 28.1;  $^{19}\text{F}$  NMR (376 MHz,  $\text{CDCl}_3$ )  $\delta$  -76.5 (s, 3F); HR-ESI-MS ( $m/z$ ): calcd. for  $\text{C}_{24}\text{H}_{22}\text{ClF}_3\text{N}_2\text{O}_4\text{SNa}$  [ $\text{M} + \text{Na}$ ] $^+$ , 549.0833, found 549.0832.

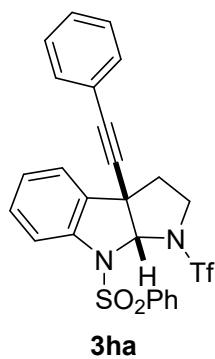

Prepared according to the general procedure **C**, **3ga** was isolated as pale solids (122.9 mg, 77% yield) by flash column chromatography (petroleum ether/ethyl acetate = 20/1, V/V).  $^1\text{H}$  NMR (600 MHz,  $\text{CDCl}_3$ )  $\delta$  7.71 (d,  $J = 8.2$  Hz, 1H), 7.67 (d,  $J = 7.6$  Hz, 2H), 7.36 (t,  $J = 7.6$  Hz, 1H), 7.32 (t,  $J = 7.6$  Hz, 1H), 7.29 – 7.11 (m, 9H), 6.33 (s, 1H), 3.96 (dd,  $J = 11.4, 7.2$  Hz, 1H), 2.96 (td,  $J = 11.4, 4.5$  Hz, 1H), 2.57 (td,  $J = 12.6, 7.2$  Hz, 1H), 2.46 (dd,  $J = 12.6, 4.5$  Hz, 1H);  $^{13}\text{C}$  NMR (150 MHz,  $\text{CDCl}_3$ )  $\delta$  141.0, 137.1, 133.8, 133.4, 131.9, 130.1, 129.0, 128.9, 128.3, 127.9, 126.9, 124.0, 122.0, 119.7 (q,  $J_{\text{CF}} = 319.2$  Hz), 118.3, 86.5, 86.1, 52.4, 48.7, 40.7, 28.2;  $^{19}\text{F}$  NMR (564 MHz,  $\text{CDCl}_3$ )

$\delta$  -75.9 (s, 3F); HR-ESI-MS ( $m/z$ ): calcd. for  $C_{25}H_{19}F_3N_2O_4S_2Na$   $[M + Na]^+$ , 555.0631, found 555.0627.

## 7. Crystal Data and Structure Refinement for pyrroloindoline product 3ah.

Single crystal of **3ah** was obtained from a mixed solution of ethyl acetate/petroleum ether (1/10) at room temperature with slow volatilization. The relative configuration of **3ah** was determined by X-ray diffraction analysis of a single crystal (Bruker D8 Quest diffractometer). The X-ray data have been deposited at the Cambridge Crystallographic Data Center (CCDC). The stereochemistry of other products was assumed by analogy.

Crystal data for **3ah**:  $C_{24}H_{22}F_4N_2O_4S$ ,  $M = 510.49$ ,  $a = 10.1699(3)$  Å,  $b = 10.9182(3)$  Å,  $c = 22.3255(7)$  Å,  $\alpha = 76.1900(10)^\circ$ ,  $\beta = 83.8180(10)^\circ$ ,  $\gamma = 75.0440(10)^\circ$ ,  $V = 2322.94(12)$  Å<sup>3</sup>,  $T = 100.(2)$  K, space group  $P-1$ ,  $Z = 4$ ,  $\mu(\text{Cu K}\alpha) = 1.842$  mm<sup>-1</sup>, 42065 reflections measured, 9080 independent reflections ( $R_{int} = 0.0325$ ). The final  $R_I$  values were 0.0503 ( $I > 2\sigma(I)$ ). The final  $wR(F^2)$  values were 0.1467 ( $I > 2\sigma(I)$ ). The final  $R_I$  values were 0.0647 (all data). The final  $wR(F^2)$  values were 0.1632 (all data). The goodness of fit on  $F^2$  was 1.492.

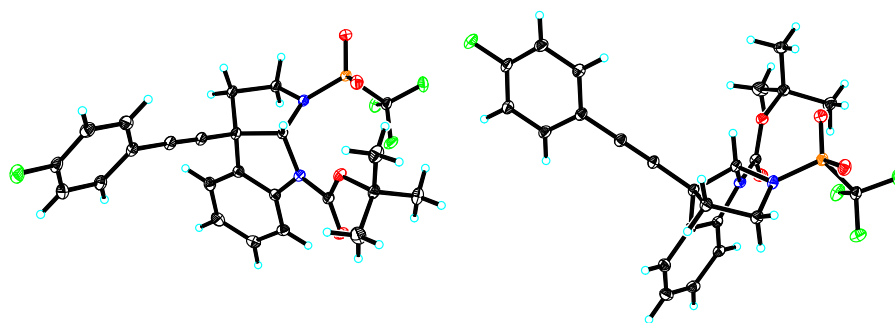

View of the molecules in an asymmetric unit.

Displacement ellipsoids are drawn at the 30% probability level.

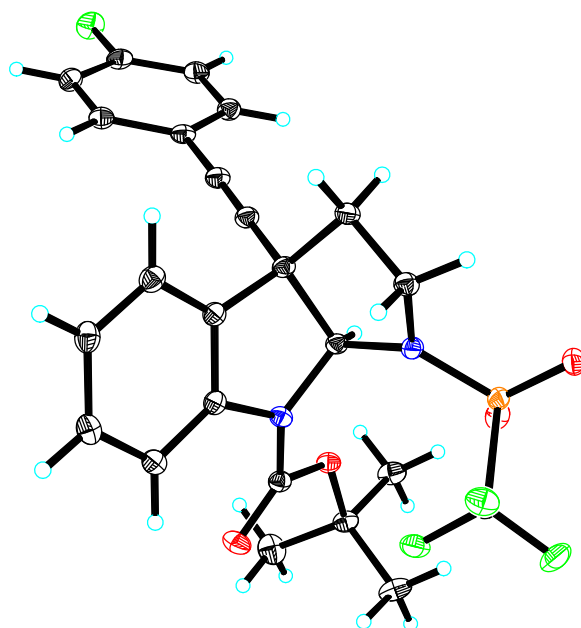

View of a molecule of **3ah** with the atom-labelling scheme.  
Displacement ellipsoids are drawn at the 30% probability level.

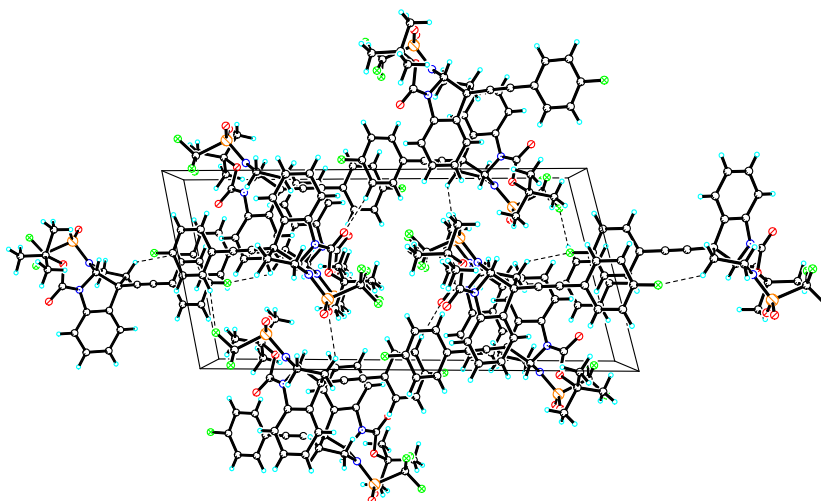

View of the pack drawing of **3ah**.  
Hydrogen-bonds are shown as dashed lines.

**Table S1. Crystal data and structure refinement for 3ah\_0m.**

|                     |                                                                                |
|---------------------|--------------------------------------------------------------------------------|
| Identification code | global                                                                         |
| Empirical formula   | C <sub>24</sub> H <sub>22</sub> F <sub>4</sub> N <sub>2</sub> O <sub>4</sub> S |
| Formula weight      | 510.49                                                                         |

|                                   |                                                                                                                               |
|-----------------------------------|-------------------------------------------------------------------------------------------------------------------------------|
| Temperature                       | 100(2) K                                                                                                                      |
| Wavelength                        | 1.54178 Å                                                                                                                     |
| Crystal system                    | Triclinic                                                                                                                     |
| Space group                       | P-1                                                                                                                           |
| Unit cell dimensions              | a = 10.1699(3) Å      a = 76.1900(10)°.<br>b = 10.9182(3) Å      b = 83.8180(10)°.<br>c = 22.3255(7) Å      g = 75.0440(10)°. |
| Volume                            | 2322.94(12) Å <sup>3</sup>                                                                                                    |
| Z                                 | 4                                                                                                                             |
| Density (calculated)              | 1.460 Mg/m <sup>3</sup>                                                                                                       |
| Absorption coefficient            | 1.842 mm <sup>-1</sup>                                                                                                        |
| F(000)                            | 1056                                                                                                                          |
| Crystal size                      | 0.540 x 0.280 x 0.250 mm <sup>3</sup>                                                                                         |
| Theta range for data collection   | 2.04 to 72.36°.                                                                                                               |
| Index ranges                      | -12<=h<=12, -13<=k<=13, -27<=l<=26                                                                                            |
| Reflections collected             | 42065                                                                                                                         |
| Independent reflections           | 9080 [R(int) = 0.0325]                                                                                                        |
| Completeness to theta = 72.36°    | 98.6 %                                                                                                                        |
| Absorption correction             | Semi-empirical from equivalents                                                                                               |
| Max. and min. transmission        | 0.66 and 0.37                                                                                                                 |
| Refinement method                 | Full-matrix least-squares on F <sup>2</sup>                                                                                   |
| Data / restraints / parameters    | 9080 / 0 / 638                                                                                                                |
| Goodness-of-fit on F <sup>2</sup> | 1.492                                                                                                                         |
| Final R indices [I>2sigma(I)]     | R1 = 0.0503, wR2 = 0.1467                                                                                                     |
| R indices (all data)              | R1 = 0.0647, wR2 = 0.1632                                                                                                     |
| Extinction coefficient            | 0.0280(11)                                                                                                                    |
| Largest diff. peak and hole       | 1.255 and -1.188 e.Å <sup>-3</sup>                                                                                            |

## 8. Gram-scale synthesis and several transformations of pyrroloindoline product **3aa**.

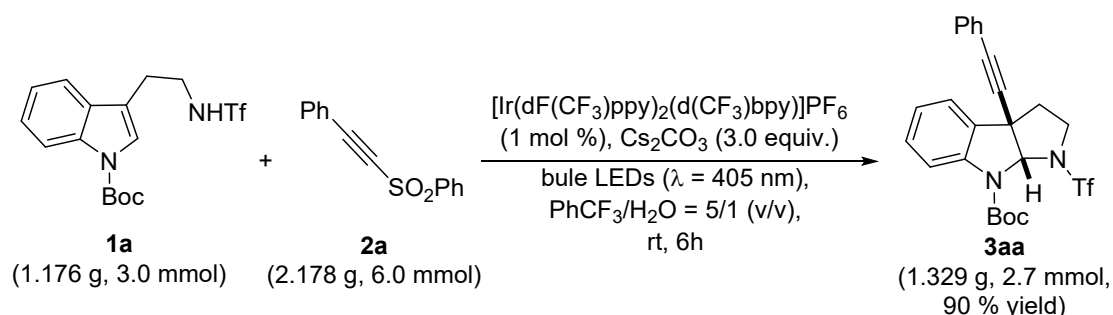

**Scheme S5.** Gram-scale reaction for the pyrroloindoline product **3aa**.

To a 100 mL round-bottom flask equipped with a magnetic stir bar, typtamine derivate **1a** (1.176 g, 3.00 mmol, 1.0 equiv.), acetylenic sulfone **2a** (2.178 g, 9.00 mmol, 3.0 equiv.)  $[\text{Ir}(\text{dF}(\text{CF}_3)\text{ppy})_2(\text{d}(\text{CF}_3)\text{bpy})]\text{PF}_6$  (34.4 mg, 0.03 mmol, 0.01 equiv.),  $\text{Cs}_2\text{CO}_3$  (2.932 g, 9.00 mmol, 3.0 equiv.),  $\text{PhCF}_3$  (20 mL) and  $\text{H}_2\text{O}$  (4 mL) were sequentially added. The reaction mixture was degassed three times by freeze-pump-thaw method. The tube was stirred and irradiated with two 18W light emitting diode (LED) lamps from approximately 10 cm away at room temperature for 6 h under argon atmosphere. After completion of the reaction (by TLC analysis), it was quenched with sat. aqueous  $\text{NH}_4\text{Cl}$  solution (30 mL), and extracted with EtOAc ( $3 \times 20 \text{ mL}$ ). The combined organic layers were washed with brine (60 mL), dried over  $\text{Na}_2\text{SO}_4$ , filtered, and concentrated by rotary evaporation. The residue was purified by column chromatography (petroleum ether/ethyl acetate = 30/1, V/V) to afford the the pyrroloindoline product **3aa** (1.329 g, 2.70 mmol, 90 %) as colorless powders.  $^1\text{H}$  NMR (600 MHz,  $\text{CDCl}_3$ ):  $\delta$  7.75 (br. s, 1H), 7.41 – 7.28 (m, 7H), 7.15 (t,  $J = 7.4 \text{ Hz}$ , 1H), 6.51 (s, 1H), 3.96 (dd,  $J = 12.0, 7.0 \text{ Hz}$ , 1H), 3.04 (td,  $J = 12.0, 4.6 \text{ Hz}$ , 1H), 2.66 (td,  $J = 12.6, 7.0 \text{ Hz}$ , 1H), 2.60 (dd,  $J = 12.6, 4.6 \text{ Hz}$ , 1H), 1.59 (s, 9H);  $^{13}\text{C}$  NMR (150 MHz,  $\text{CDCl}_3$ )  $\delta$  151.8, 141.8, 131.9, 131.5, 130.0, 128.8, 128.5, 124.7, 123.5, 122.3, 119.8 (q,  $J_{\text{CF}} = 320.0 \text{ Hz}$ ), 117.0, 87.4, 85.7, 84.0, 83.4, 51.4, 49.1, 40.6, 28.2;  $^{19}\text{F}$  NMR (564 MHz,  $\text{CDCl}_3$ )  $\delta$  -76.5 (s, 3F); HR-ESI-MS ( $m/z$ ): calcd. for  $\text{C}_{24}\text{H}_{23}\text{F}_3\text{N}_2\text{O}_4\text{SNa}$  [ $\text{M} + \text{Na}$ ] $^+$ , 515.1223, found 515.1226.

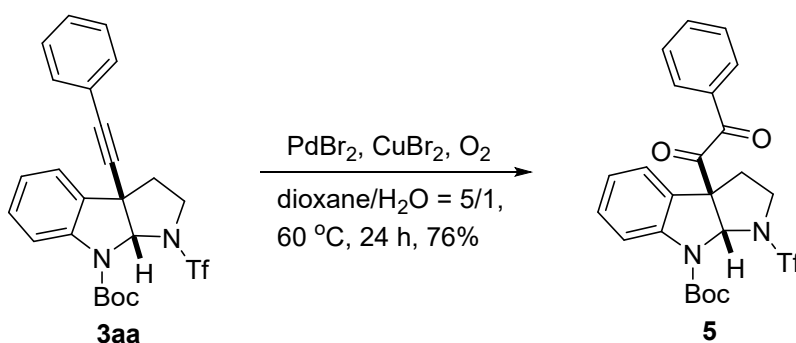

**Scheme S6.** Oxidation of alkynyl pyrroloindoline **3aa** into 1,2-diketone compound **5**.<sup>5</sup>

Alkynyl pyrroloindoline **3aa** (49.2 mg, 0.10 mmol, 1.0 equiv.), PdBr<sub>2</sub> (1.3 mg, 0.005 mmol, 0.05 equiv.), and CuBr<sub>2</sub> (2.2 mg, 0.01 mmol, 0.1 equiv.) were added to a Schlenk tube under air. The septum-sealed tube was evacuated and refilled with O<sub>2</sub> thrice. Dioxane (4 mL) and H<sub>2</sub>O (0.8 mL) were added via syringe. The reaction mixture was heated in an oil bath at 60 °C for 24 h. After the reaction completed, water (10 mL) was added and the resulting mixture was extracted with EtOAc (3 × 10 mL). The combined organic layers were washed with brine (30 mL), dried over Na<sub>2</sub>SO<sub>4</sub>, filtered, and concentrated by rotary evaporation. The residue was purified by column chromatography (petroleum ether/ethyl acetate = 10/1, V/V) to afford 1,2-diketone compound **5** (39.8 mg, 0.076 mmol, 76 %) as colorless powders. <sup>1</sup>H NMR (600 MHz, CDCl<sub>3</sub>) δ 7.75 (br. s, 1H), 7.71 (d, *J* = 7.8 Hz, 2H), 7.59 (t, *J* = 7.4 Hz, 1H), 7.41 (t, *J* = 7.8 Hz, 2H), 7.29 (t, *J* = 7.8 Hz, 1H), 7.18 (d, *J* = 7.4 Hz, 1H), 7.01 (t, *J* = 7.4 Hz, 1H), 6.96 (s, 1H), 4.04 (dd, *J* = 11.4, 7.3 Hz, 1H), 3.13 (td, *J* = 11.4, 4.4 Hz, 1H), 2.81 (td, *J* = 12.7, 7.3 Hz, 1H), 2.59 (dd, *J* = 12.7, 4.4 Hz, 1H), 1.59 (s, 8H); <sup>13</sup>C NMR (150 MHz, CDCl<sub>3</sub>) δ 195.3, 191.6, 151.7, 143.6, 135.2, 132.2, 130.8, 130.0, 129.0, 126.3, 124.5, 124.2, 119.8 (q, *J*<sub>CF</sub> = 320.6 Hz), 117.8, 83.4, 80.8, 66.9, 48.9, 35.5, 28.1; <sup>19</sup>F NMR (564 MHz, CDCl<sub>3</sub>) δ -76.6 (s, 3F); HR-ESI-MS (*m/z*): calcd. for C<sub>24</sub>H<sub>23</sub>F<sub>3</sub>N<sub>2</sub>O<sub>6</sub>SNa [M + Na]<sup>+</sup>, 547.1121, found 547.1120.

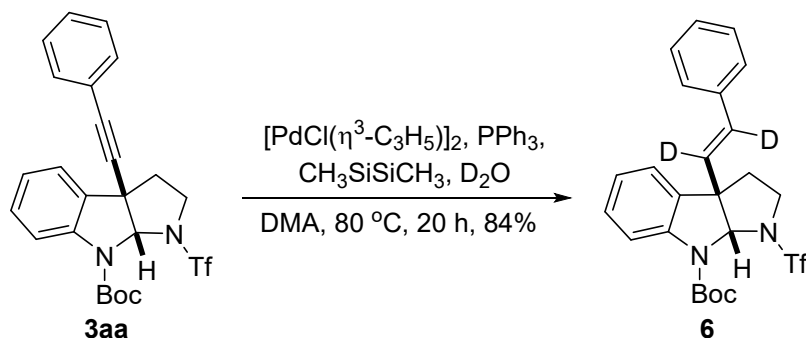

**Scheme S7.** Reduction of alkyne pyrroloindoline **3aa** into 1,2-dideuterioalkene compound **6**.<sup>6</sup>

A solution of  $[\text{PdCl}(\eta^3\text{-C}_3\text{H}_5)]_2$  (0.9 mg, 0.0025 mmol, 0.025 equiv.) and  $\text{PPh}_3$  (2.6 mg, 0.01 mmol, 0.1 equiv.) in DMA (4 mL) was stirred at room temperature for 10 min. To the resulting mixture were added alkyne pyrroloindoline **3aa** (49.2 mg, 0.10 mmol, 1.0 equiv.), hexamethyldisilane (22.0 mg, 0.15 mmol, 1.5 equiv.) and  $\text{D}_2\text{O}$  (18.1  $\mu\text{L}$ , 1.00 mmol, 10.0 equiv.). After stirring at 80  $^\circ\text{C}$  for 20 h, water (10 mL) was added and the resulting mixture was extracted with EtOAc (3  $\times$  10 mL). The combined organic layers were washed with brine (30 mL), dried over  $\text{Na}_2\text{SO}_4$ , filtered, and concentrated by rotary evaporation. The residue was purified by column chromatography (petroleum ether/ethyl acetate = 30/1, V/V) to afford 1,2-dideuterioalkene compound **6** (41.7 mg, 0.084 mmol, 84 %) as colorless powders.  $^1\text{H}$  NMR (600 MHz,  $\text{CDCl}_3$ )  $\delta$  7.78 (br. s, 1H), 7.38 – 7.29 (m, 5H), 7.28 – 7.24 (m, 1H), 7.19 (d,  $J = 7.6$  Hz, 1H), 7.15 (t,  $J = 7.6$  Hz, 1H), 6.23 (s, 1H), 3.97 (dd,  $J = 11.4, 7.0$  Hz, 1H), 3.12 (td,  $J = 11.4, 5.0$  Hz, 1H), 2.47 (td,  $J = 12.5, 7.0$  Hz, 1H), 2.59 (dd,  $J = 12.5, 5.0$  Hz, 1H) 1.56 (s, 9H);  $^{13}\text{C}$  NMR (150 MHz,  $\text{CDCl}_3$ )  $\delta$  151.9, 142.5, 136.0, 132.0, 129.5, 128.8, 128.7, 128.3, 128.2, 126.7, 124.4, 124.1, 119.9 (q,  $J_{\text{CF}} = 321.0$  Hz), 117.3, 83.5, 83.1, 60.0, 49.8, 37.8, 28.2;  $^{19}\text{F}$  NMR (564 MHz,  $\text{CDCl}_3$ )  $\delta$  -76.5 (s, 3F); HR-ESI-MS ( $m/z$ ): calcd. for  $\text{C}_{24}\text{H}_{23}\text{D}_2\text{F}_3\text{N}_2\text{O}_6\text{SNa}$   $[\text{M} + \text{Na}]^+$ , 519.1505, found 519.1507.



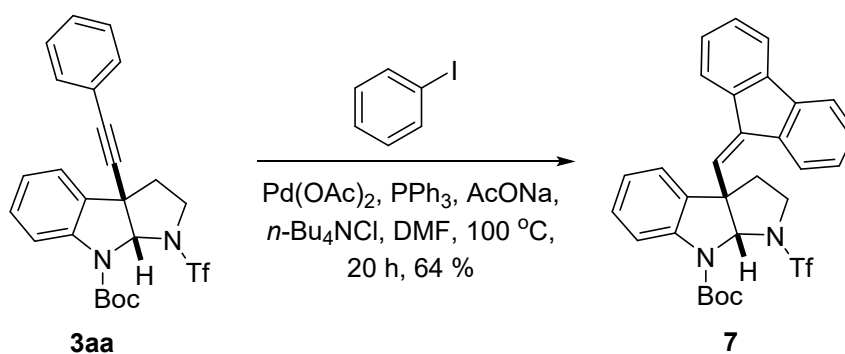

**Scheme S8.** Synthesis of 9-alkylidene-9*H*-fluorene compound **7** from alkynyl pyrroloindoline **3aa**.<sup>7</sup>

Alkynyl pyrroloindoline **3aa** (49.2 mg, 0.10 mmol, 1.0 equiv.), iodobenzene (20.4 mg, 0.10 mmol, 1.0 equiv.), palladium acetate (1.1 mg, 0.005 mmol, 0.05 equiv.), PPh<sub>3</sub> (2.6 mg, 0.01 mmol, 0.1 equiv.), NaOAc (16.4 mg, 0.20 mmol, 2.0 equiv.), *n*-Bu<sub>4</sub>NCl (27.8 mg, 0.10 mmol, 1.0 equiv.) and 4 mL of DMF were placed in a 25 mL round-bottom flask equipped with a magnetic stir bar. The reaction mixture was heated in an oil bath at 100 °C for 20 h. After completion of the reaction, it was quenched with sat. aqueous NH<sub>4</sub>Cl solution (10 mL), and extracted with EtOAc (3 × 10 mL). The combined organic layers were washed with brine (30 mL), dried over Na<sub>2</sub>SO<sub>4</sub>, filtered, and concentrated by rotary evaporation. The residue was purified by column chromatography (petroleum ether/ethyl acetate = 30/1, V/V) to afford 9-alkylidene-9*H*-fluorene compound **7** (36.4 mg, 0.064 mmol, 64 %) as colorless powders. <sup>1</sup>H NMR (400 MHz, CDCl<sub>3</sub>) δ 7.79 (br. s, 1H), 7.75 (d, *J* = 7.0 Hz, 1H), 7.68 (d, *J* = 7.5 Hz, 1H), 7.55 (t, *J* = 7.0 Hz, 2H), 7.44 – 7.32 (m, 5H), 7.28 – 7.20 (m, 2H), 6.86 (s, 1H), 6.68 (s, 1H), 4.16 (dd, *J* = 11.4, 7.4 Hz, 1H), 3.25 (td, *J* = 11.4, 4.9 Hz, 1H), 3.11 (td, *J* = 12.6, 7.4 Hz, 1H), 2.55 (dd, *J* = 12.6, 4.9 Hz, 1H), 1.43 (s, 9H); <sup>13</sup>C NMR (100 MHz, CDCl<sub>3</sub>) δ 151.7, 142.1, 141.8, 139.5, 139.2, 138.8, 135.8, 134.4, 129.7, 129.3, 128.9, 128.8, 127.6, 127.4, 125.9, 125.1, 123.1, 120.4, 120.3, 119.8 (q, *J*<sub>CF</sub> = 320.5 Hz), 119.7, 117.1, 83.1, 82.5, 58.7, 49.9, 38.0, 28.0; <sup>19</sup>F NMR (564 MHz, CDCl<sub>3</sub>) δ -76.5 (s, 3F); HR-ESI-MS (*m/z*): calcd. for C<sub>30</sub>H<sub>27</sub>F<sub>3</sub>N<sub>2</sub>O<sub>4</sub>SNa [M + Na]<sup>+</sup>, 591.1536, found 591.1537.

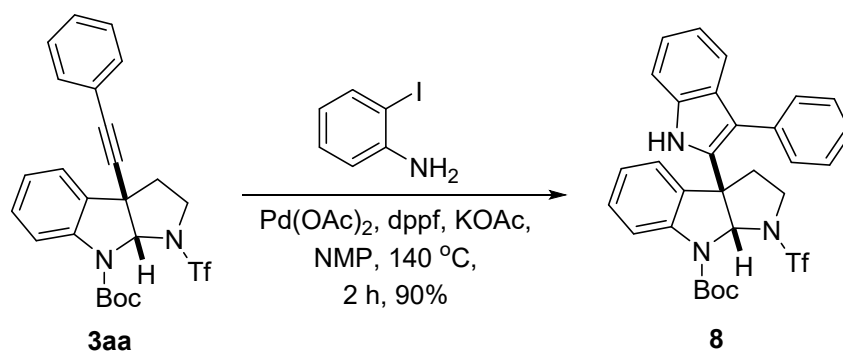

**Scheme S9.** Synthesis of 2,3-disubstituted indole **8** from alkynyl pyrroloindoline **3aa**.<sup>8</sup>

2-Iodoaniline (21.5 mg, 0.10 mmol, 1.0 equiv.), alkynyl pyrroloindoline **3aa** (59.1 mg, 0.12 mmol, 1.2 equiv.), palladium acetate (1.1 mg, 0.005 mmol, 0.05 equiv.), 1,1'-bis(diphenylphosphino)-ferrocene (4.4 mg, 0.008 mmol, 0.08 equiv.), KOAc (49.1 mg, 0.50 mmol, 5.0 equiv.) and 2 mL of anhydrous NMP were placed in a 25 mL round-bottom flask equipped with a magnetic stir bar. The resulting dark mixture was heated in an oil bath at 140 °C for 2 h. After completion of the reaction, it was cooled to room temperature, filtered through a pad of Celite, which was rinsed with EtOAc. Then, it was diluted with H<sub>2</sub>O (20 mL) and extracted with EtOAc (3 × 10 mL). The combined organic layers were washed with brine (30 mL), dried over Na<sub>2</sub>SO<sub>4</sub>, filtered, and concentrated by rotary evaporation. The residue was purified by column chromatography (petroleum ether/ethyl acetate = 10/1, V/V) to afford 2,3-disubstituted indole **8** (58.3 mg, 0.09 mmol, 90 %) as colorless oil. <sup>1</sup>H NMR (400 MHz, CDCl<sub>3</sub>) δ 7.87 (d, *J* = 7.3 Hz, 1H), 7.65 (br. s, 1H), 7.54 – 7.36 (m, 2H), 7.46 – 7.38 (m, 4H), 7.36 – 7.24 (m, 3H), 7.24 – 7.17 (m, 2H), 7.13 – 7.07 (m, 1H), 6.56 (s, 1H), 3.78 (dd, *J* = 11.3, 7.2 Hz, 1H), 2.98 (td, *J* = 11.3, 4.4 Hz, 1H), 2.73 (td, *J* = 12.5, 7.2 Hz, 1H), 2.29 (dd, *J* = 12.5, 4.4 Hz, 1H), 1.54 (s, 9H); <sup>13</sup>C NMR (100 MHz, CDCl<sub>3</sub>) δ 151.7, 142.7, 134.6, 134.3, 131.7, 131.6, 131.0, 130.5, 130.2, 129.0, 127.8, 124.9, 124.3, 123.2, 120.6, 119.77 (q, *J*<sub>CF</sub> = 322.8 Hz), 119.76, 117.7, 116.4, 111.0, 84.5, 83.7, 58.1, 49.6, 37.5, 28.2; <sup>19</sup>F NMR (376 MHz, CDCl<sub>3</sub>) δ -76.9 (s, 3F); HR-ESI-MS (*m/z*): calcd. for C<sub>30</sub>H<sub>27</sub>F<sub>3</sub>N<sub>3</sub>O<sub>4</sub>S [M – H]<sup>–</sup>, 582.1680, found 582.1682.

## 9. References

- (1) P. Feng, Y. Fan, F. Xue, W. Liu, S. Li, Y. Shi. *Org. Lett.* 2011, 13, 5827.
- (2) K. Li, J. Ou, S. Gao. *Angew. Chem., Int. Ed.* 2016, 55, 14778.
- (3) J. Zhang, F.-S. Han. *J. Org. Chem.* 2019, 84, 13890.
- (4) V. Nair, A. Augustine, T. D. Suja. *Synthesis* 2002, 2259.
- (5) W. Ren, Y. Xia, S.-J. Ji, Y. Zhang, X. Wan, J. Zhao. *Org. Lett.* 2009, 11, 1841.
- (6) E. Shirakawa, H. Otsuka, T. Hayashi. *Chem. Commun.* 2005, 5885.
- (7) Q. Tian, R. C. Larock. *Org. Lett.* 2000, 2, 3329.
- (8) F. Roschangar, J. Liu, E. Esstanove, M. Dufour, S. Rodríguez, V. Farina, E. Hickey, A. Hossain, P. -J. Jones, H. Lee, B. Z. Lu, R. Varsolona, J. Schröder, P. Beaulieu, J. Gillard, C. H. Senanayake. *Tetrahedron Lett.* 2008, 49, 363.

## 10. Copies of NMR spectra

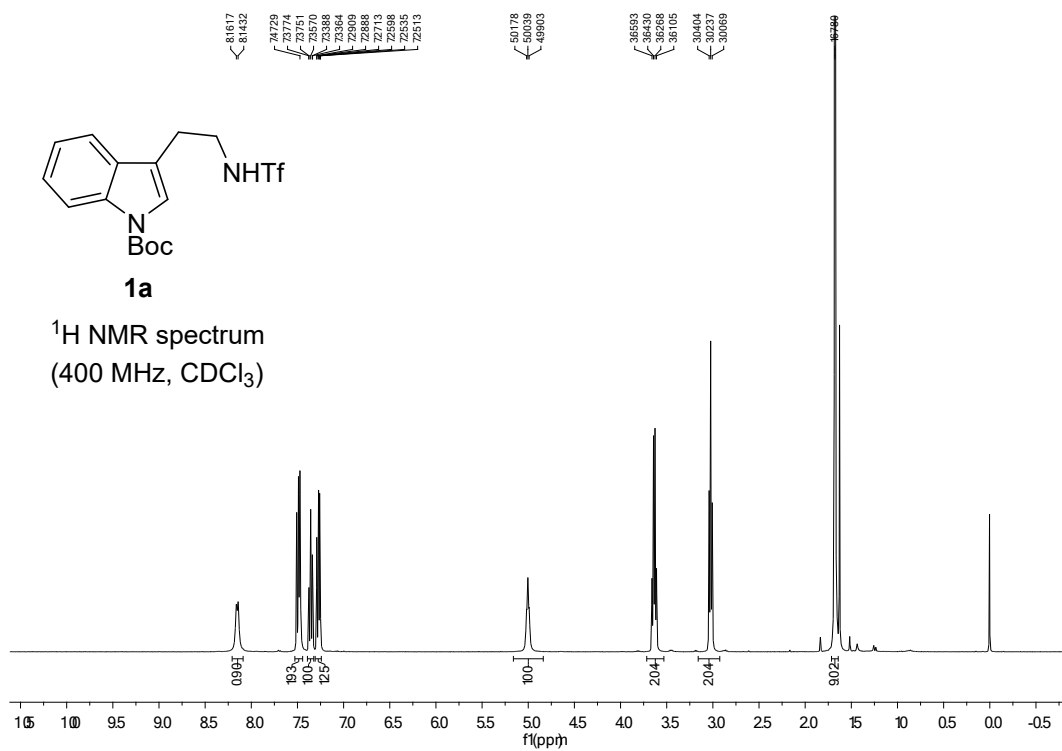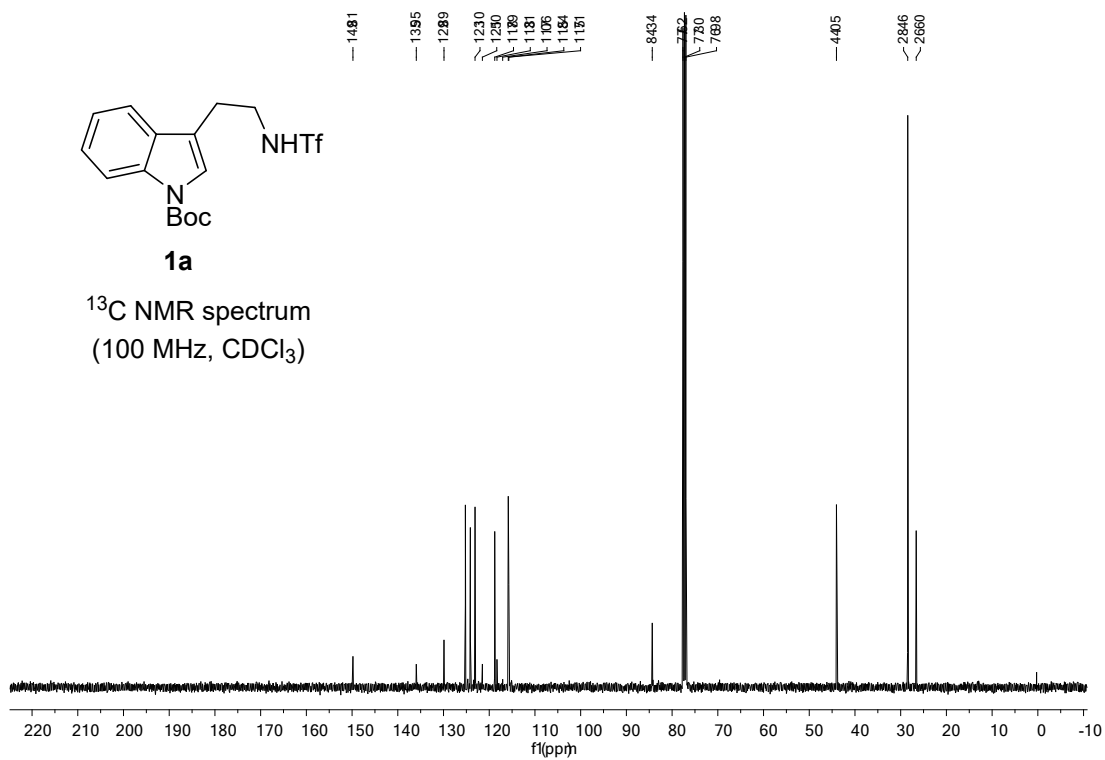

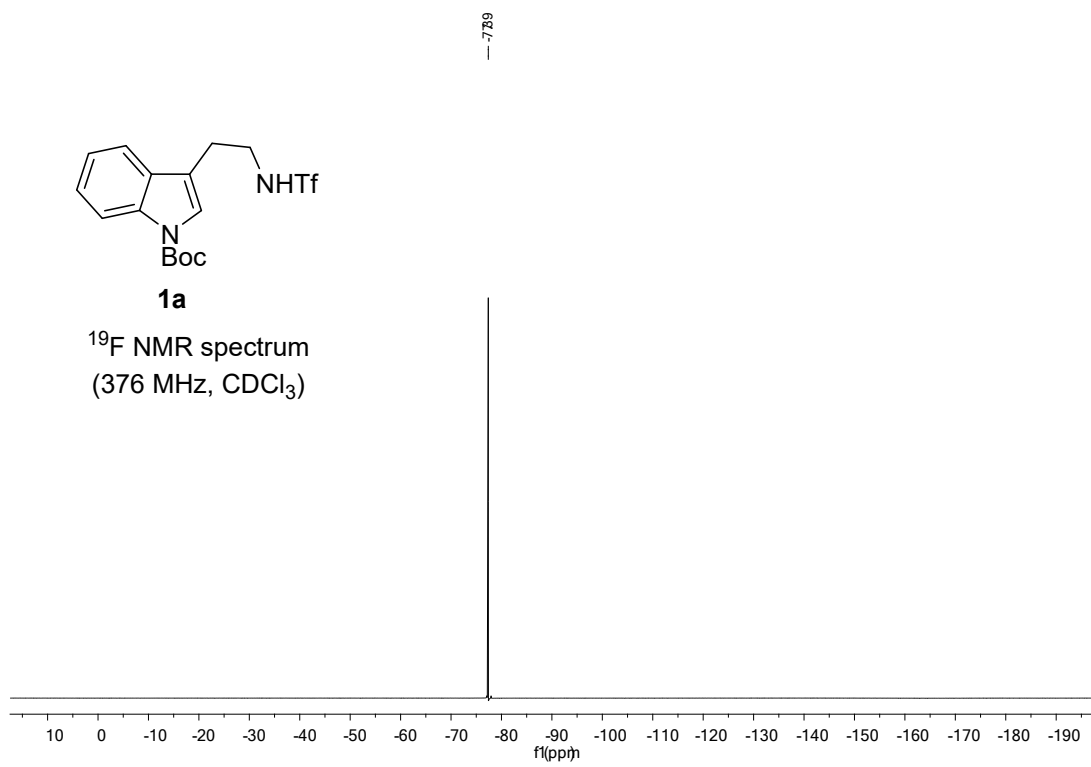



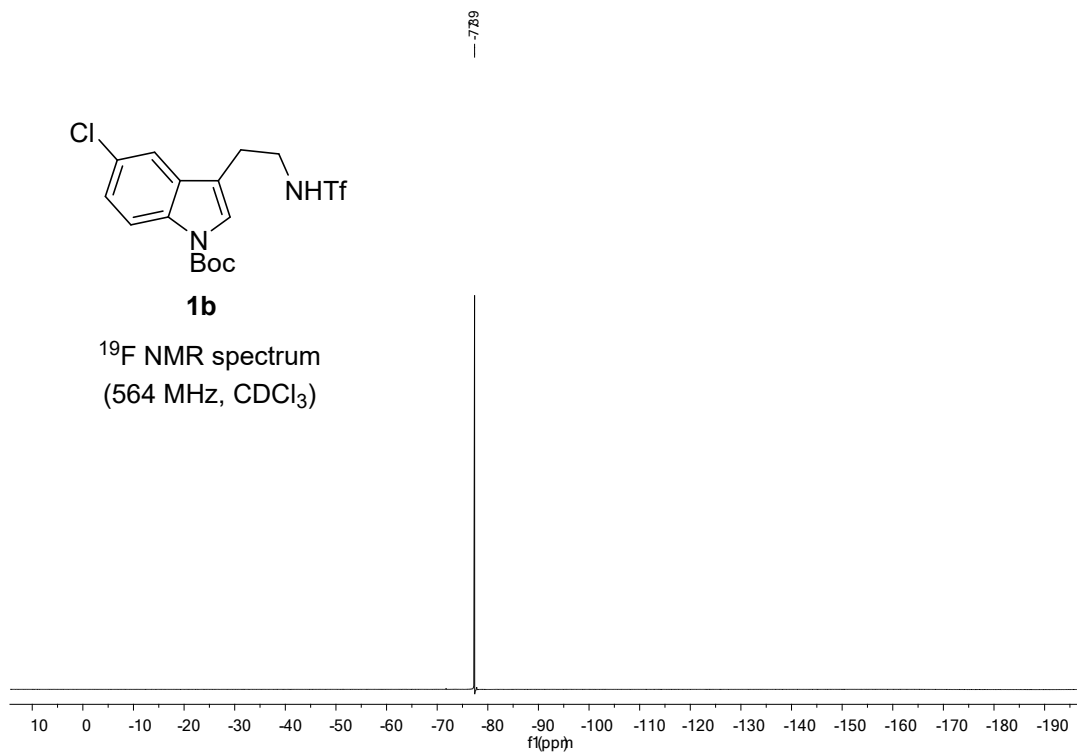

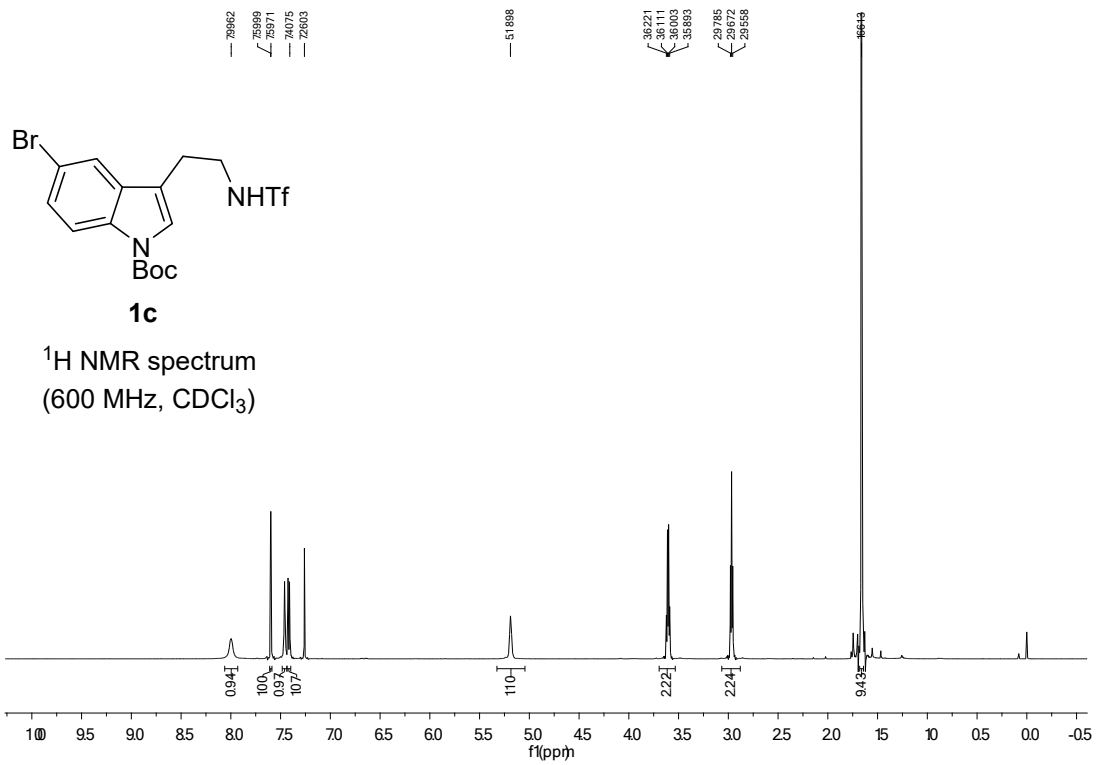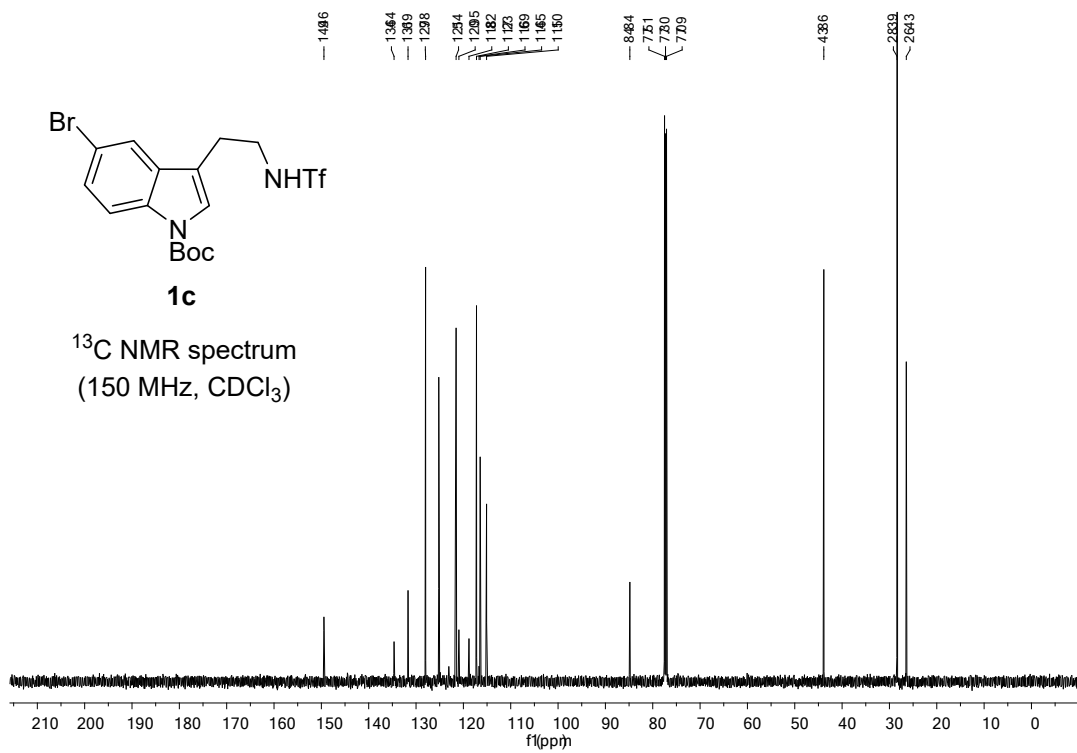



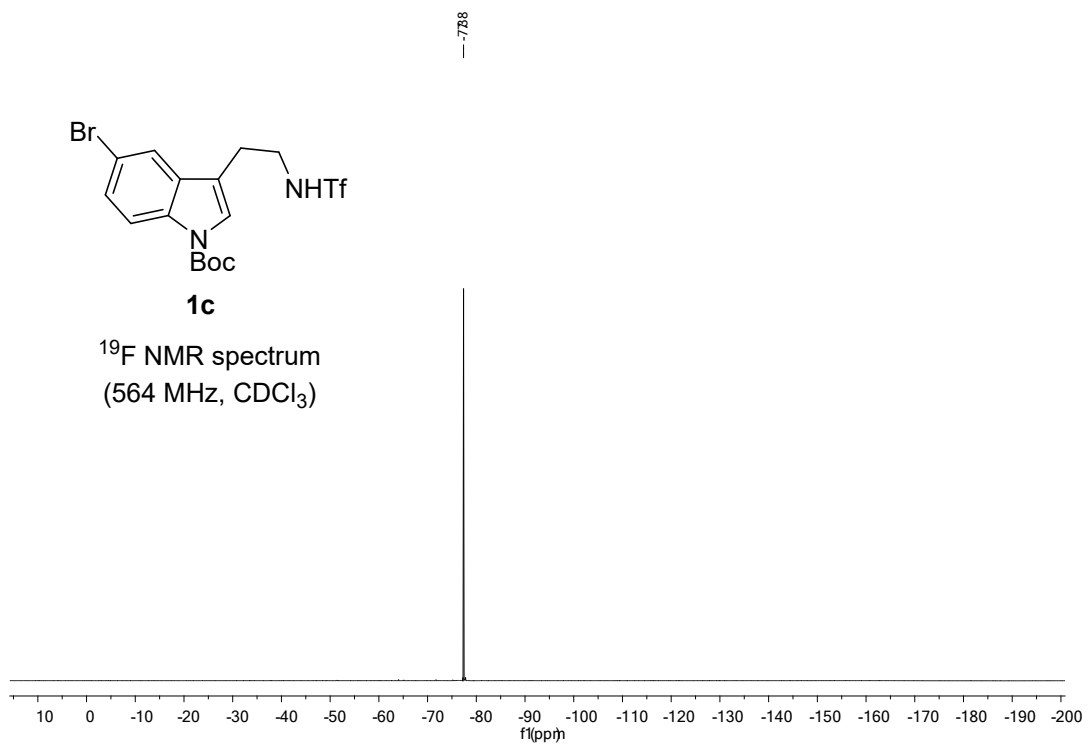

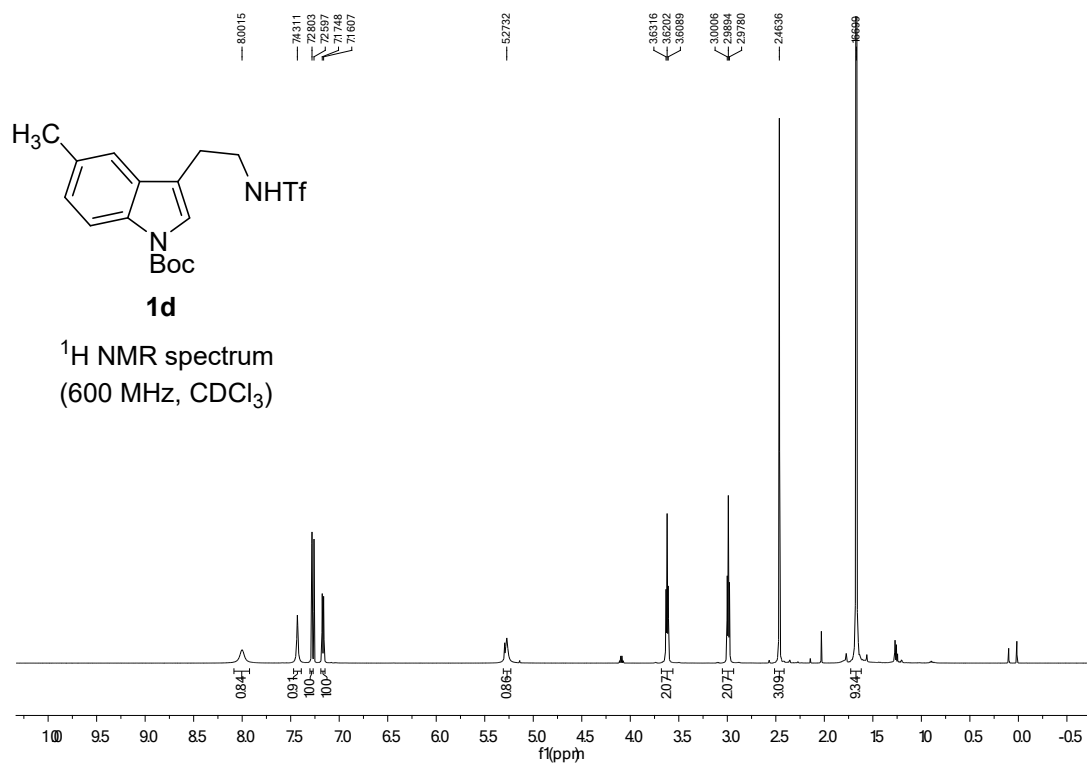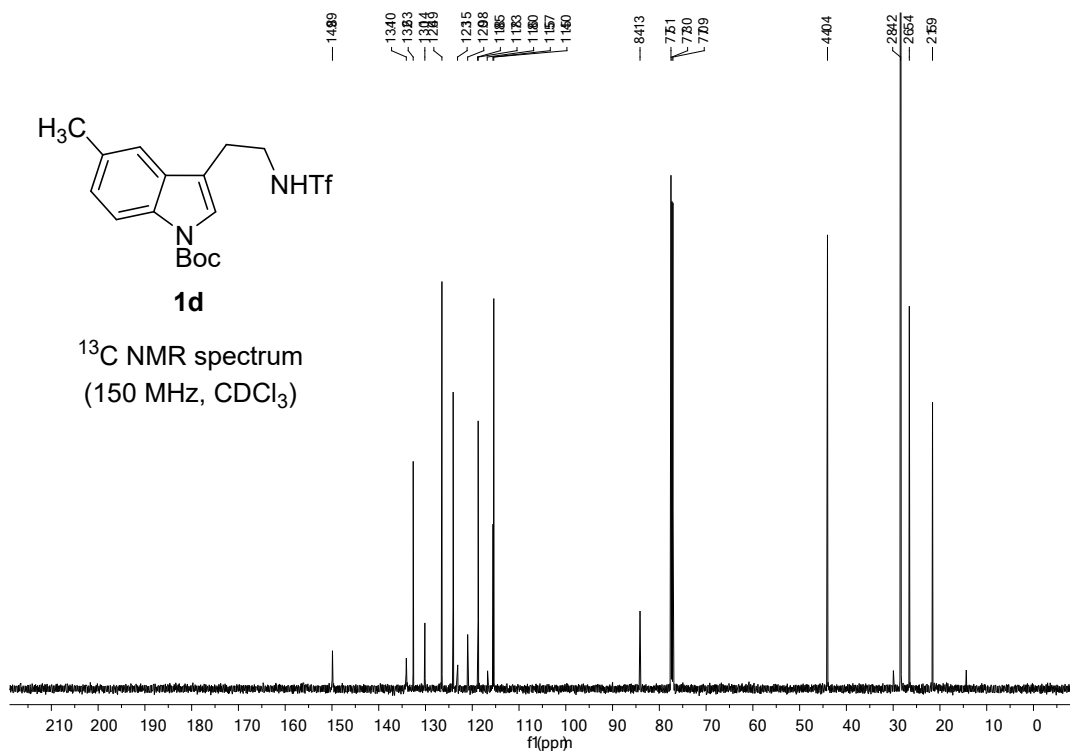

--77.3

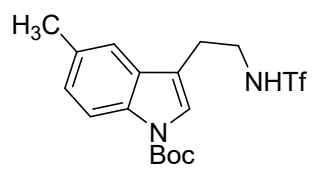

**1d**

<sup>19</sup>F NMR spectrum  
(564 MHz, CDCl<sub>3</sub>)

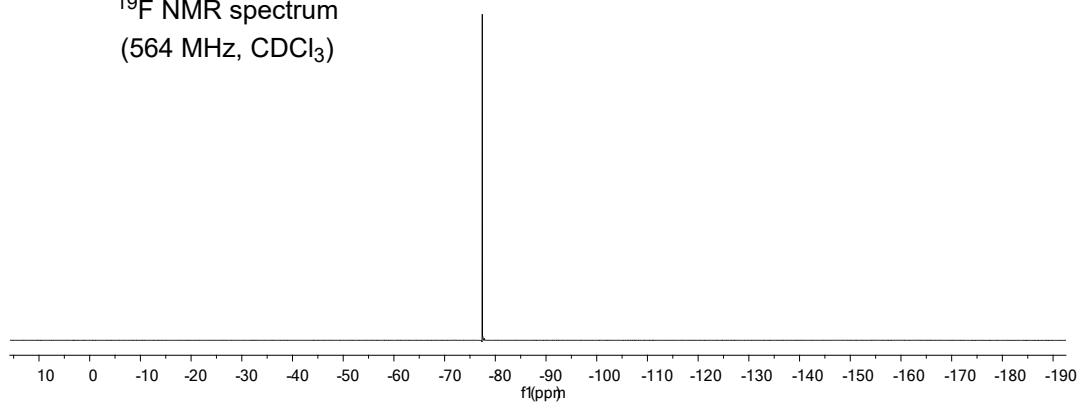

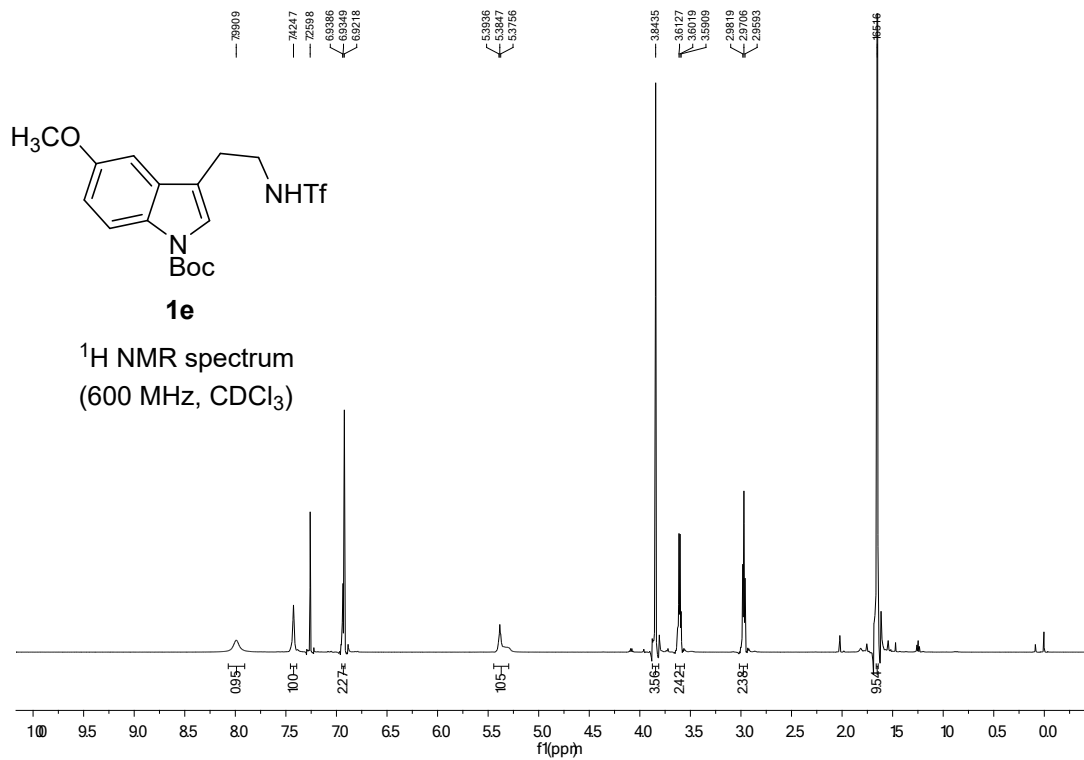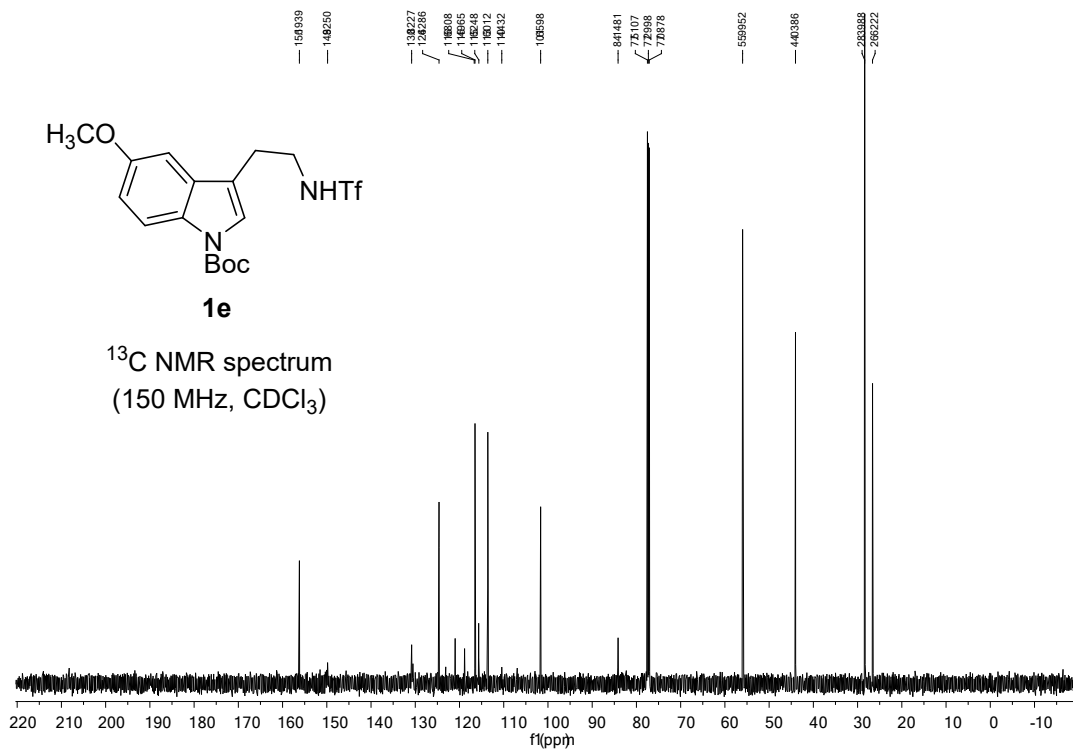

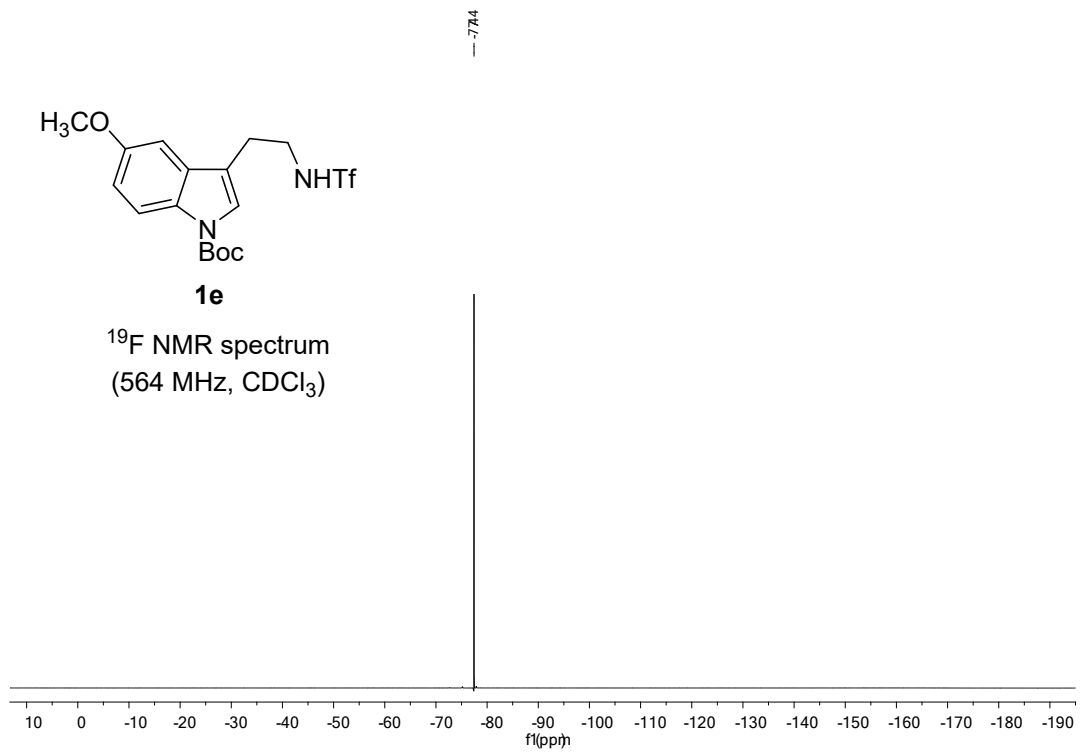

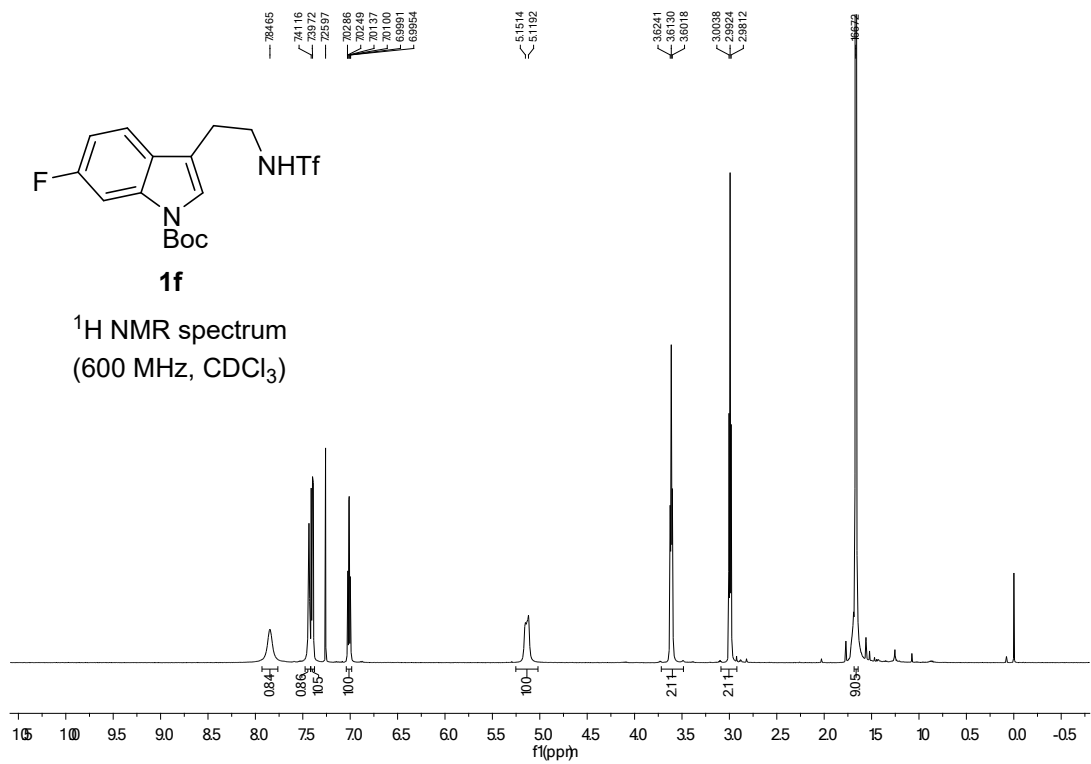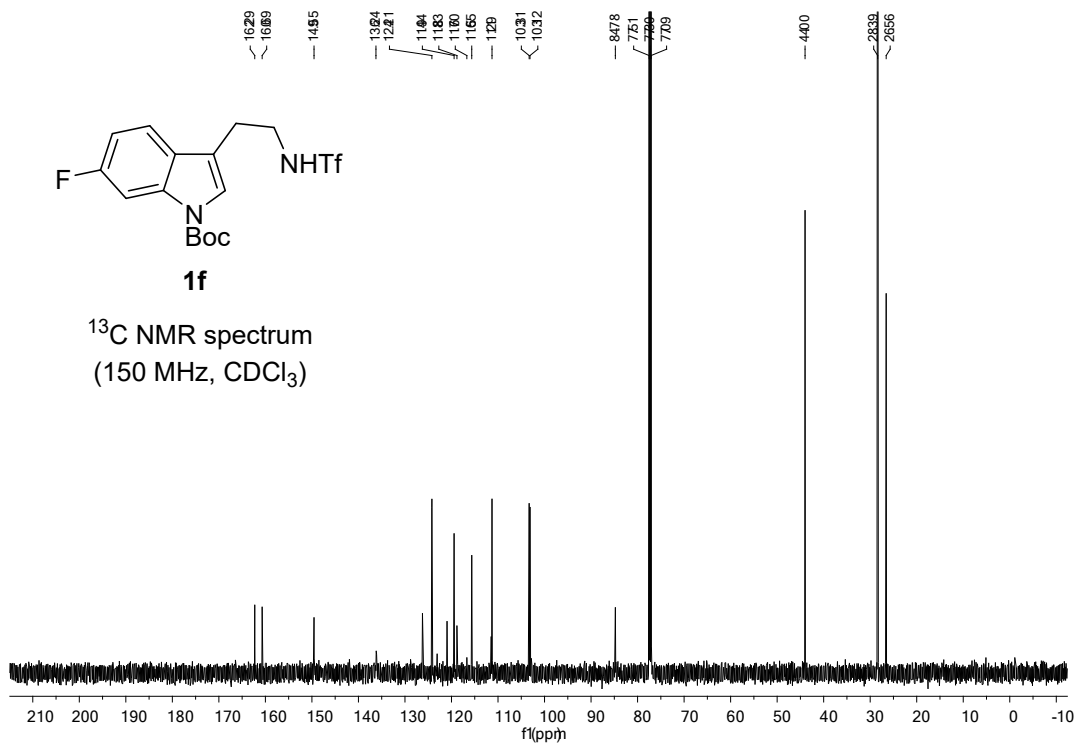

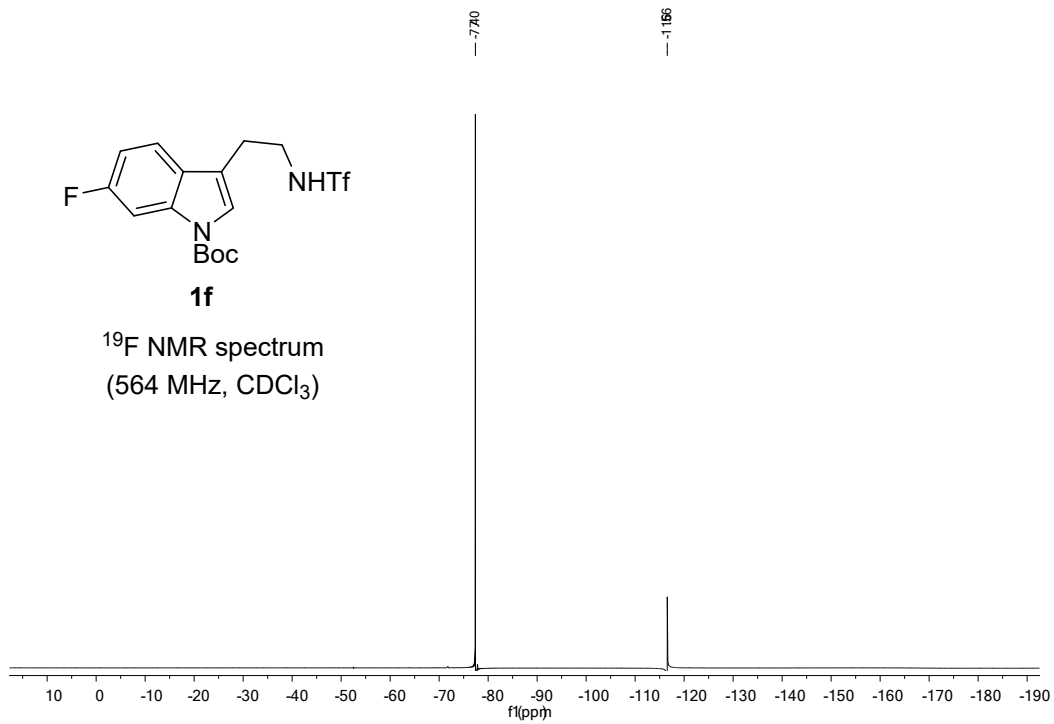

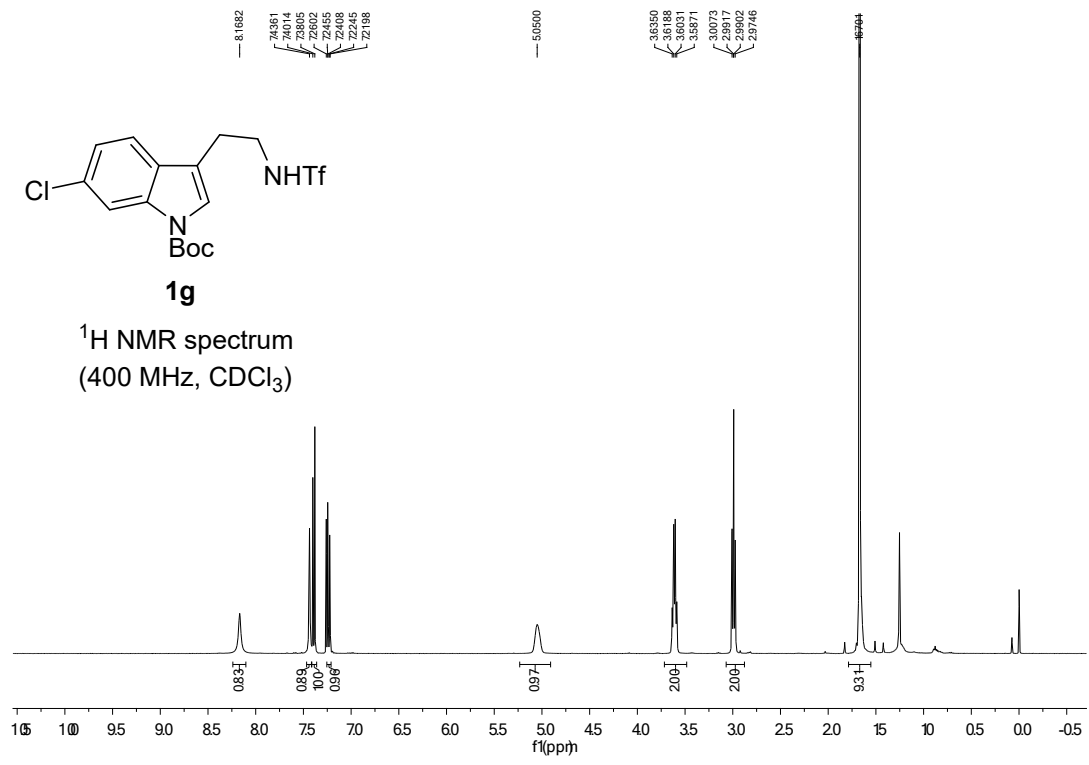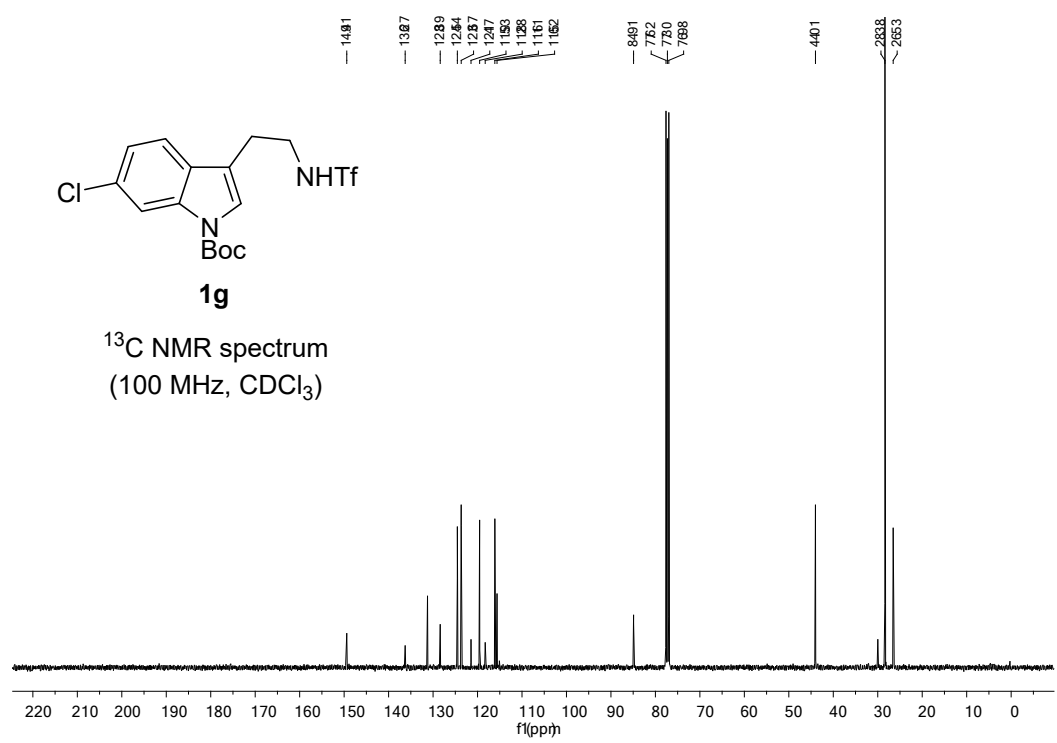



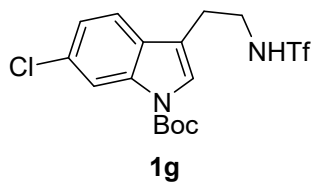

<sup>19</sup>F NMR spectrum  
(376 MHz, CDCl<sub>3</sub>)

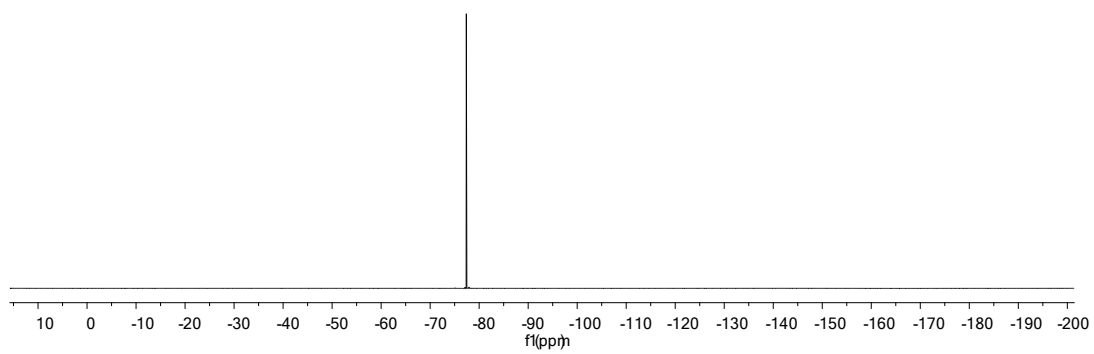

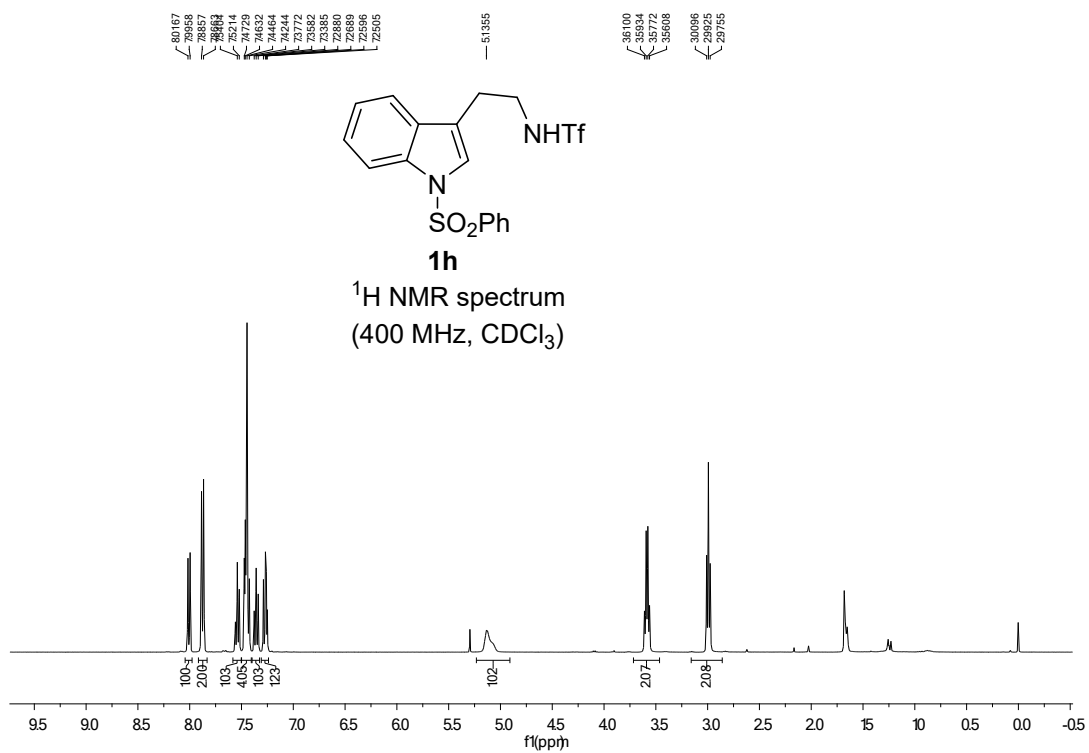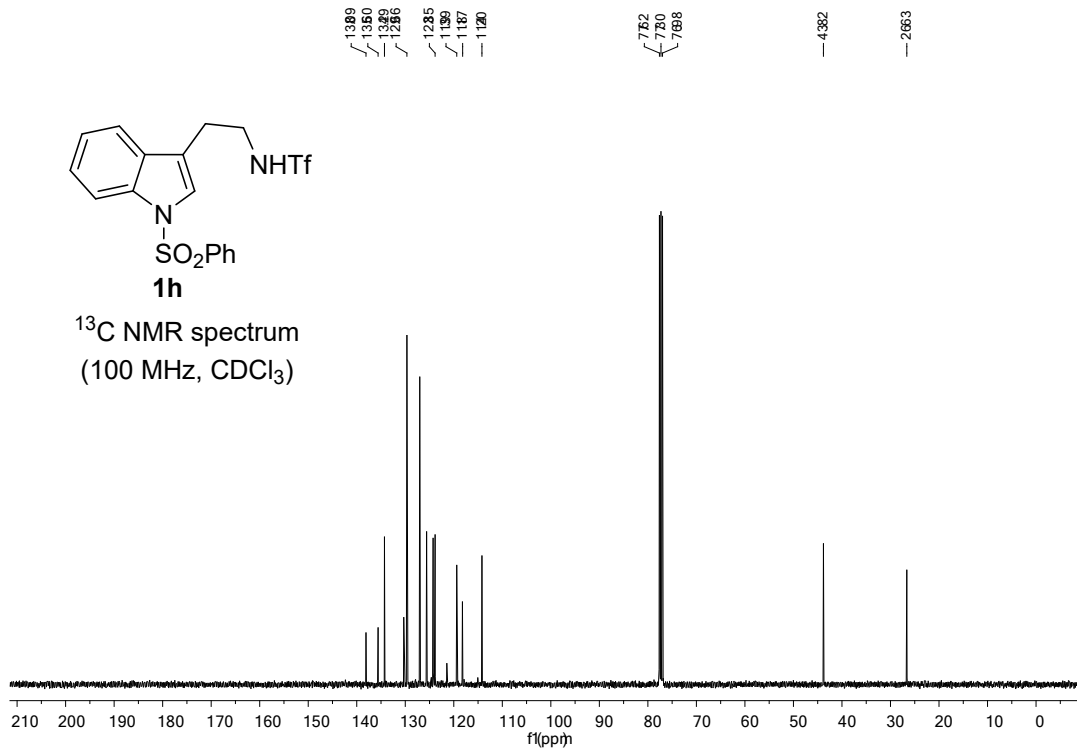

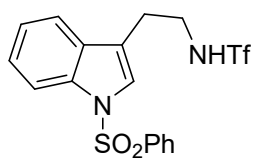

**1h**

<sup>19</sup>F NMR spectrum  
(376 MHz, CDCl<sub>3</sub>)

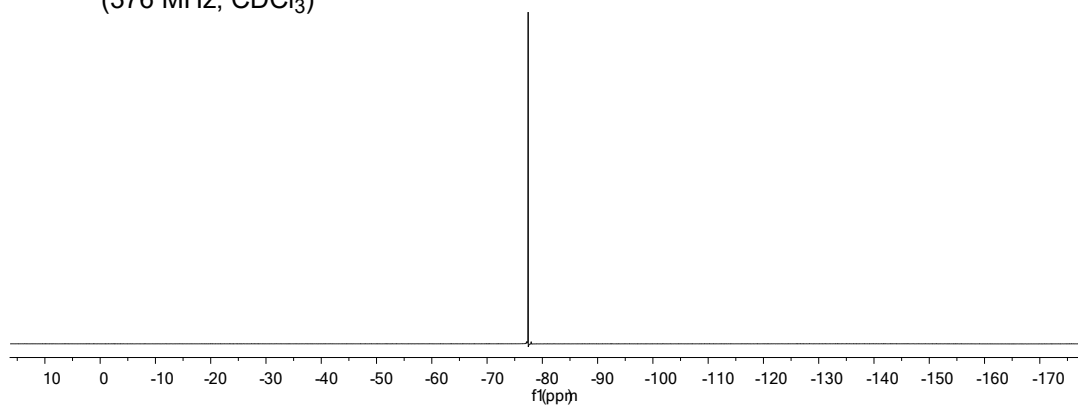

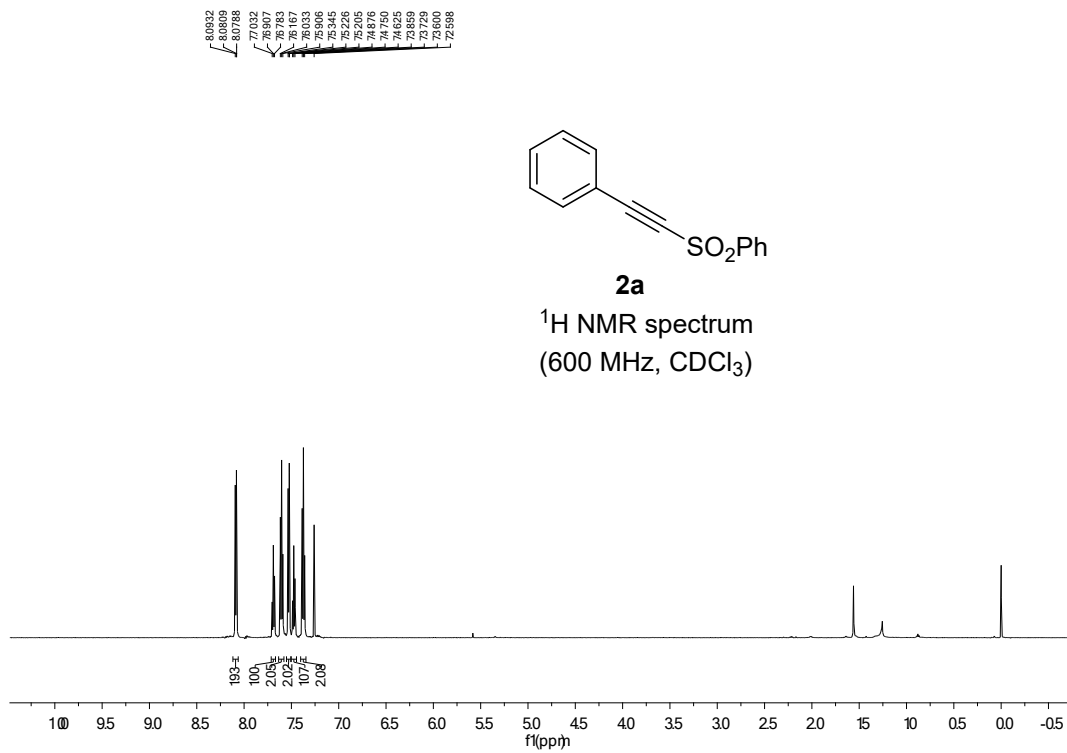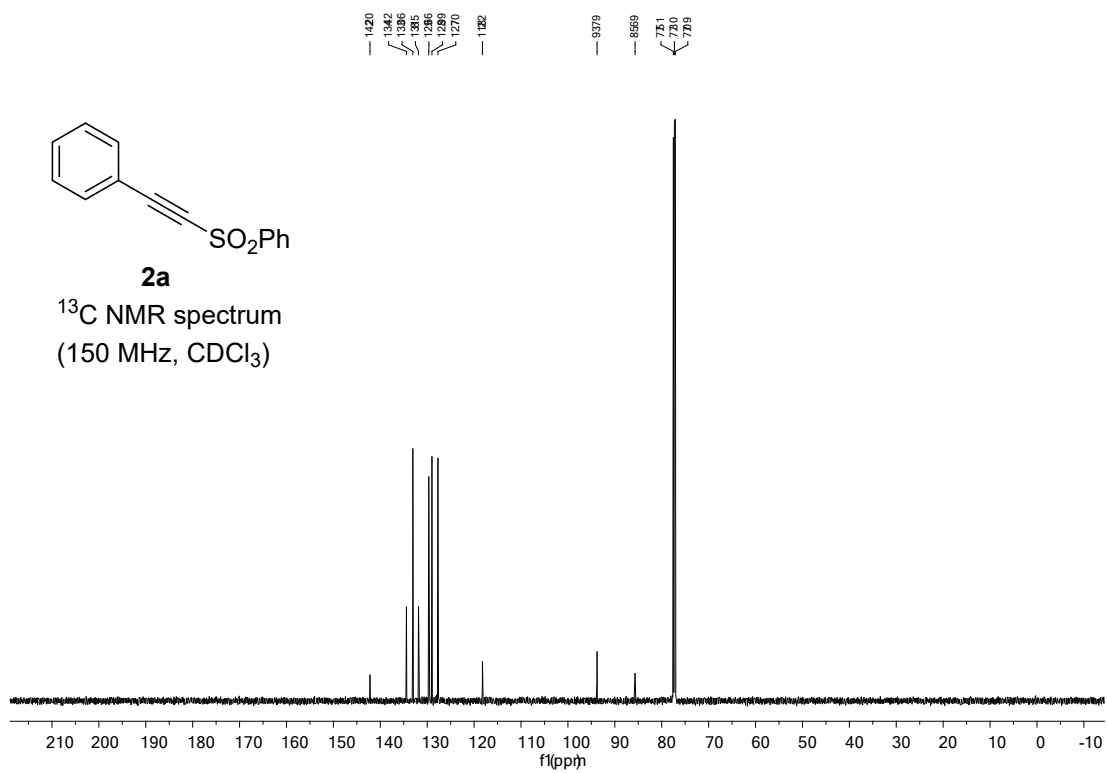

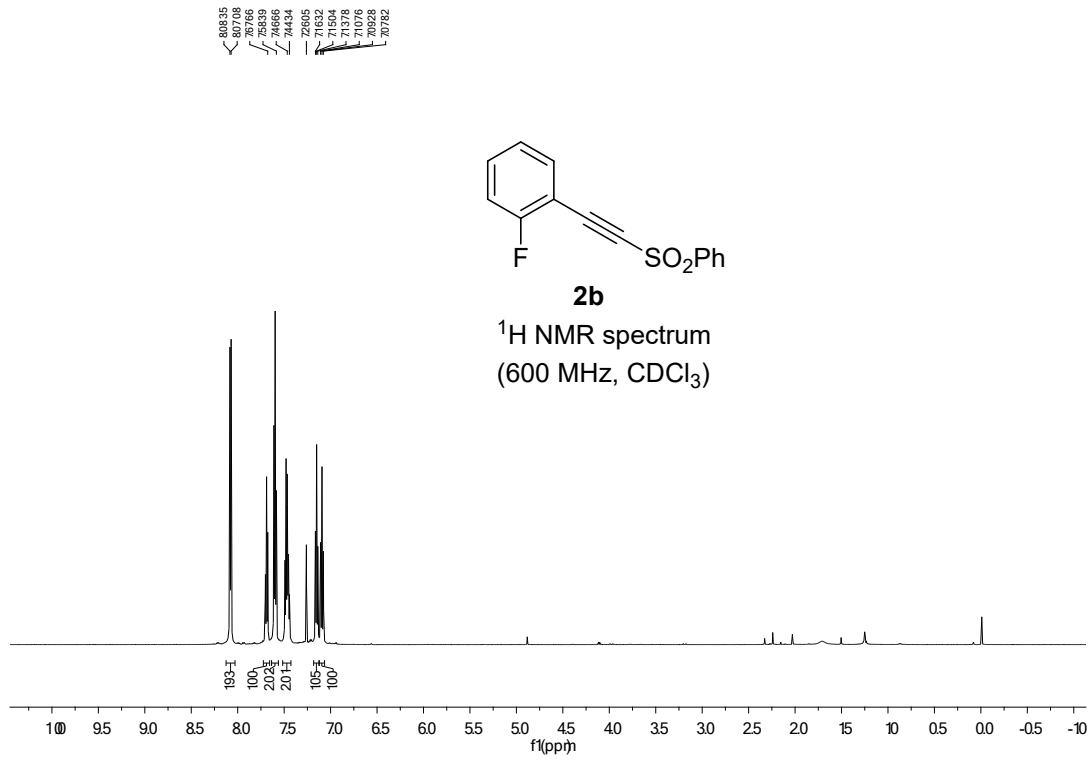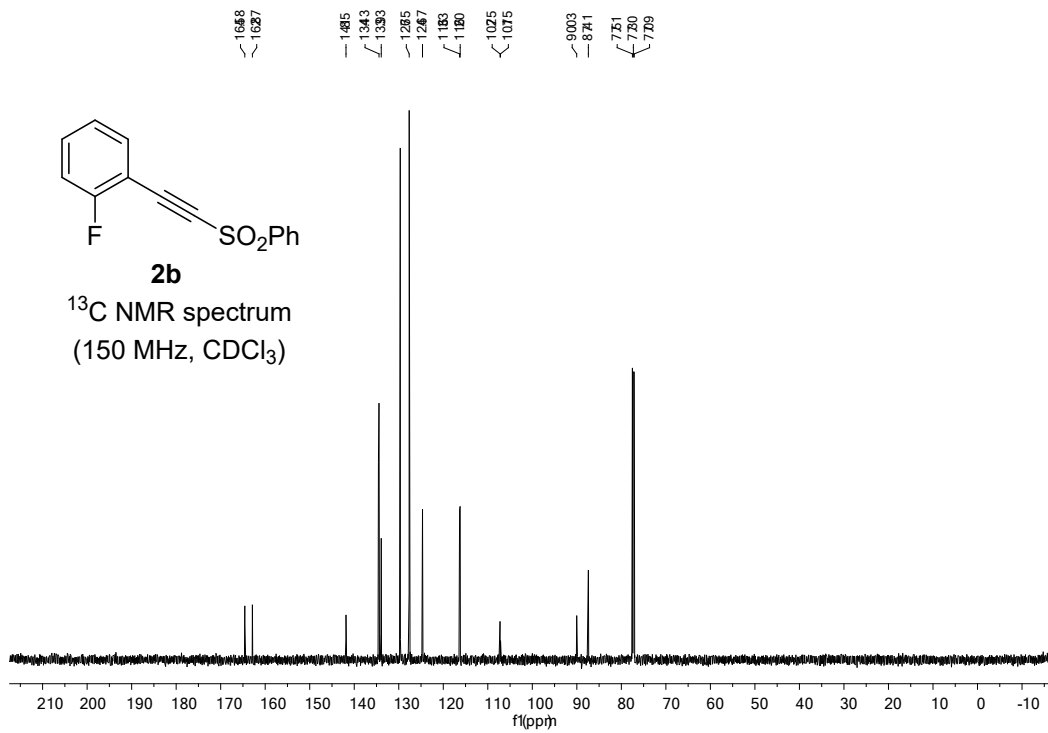

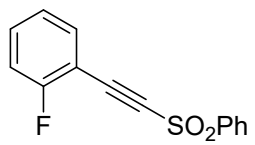

**2b**

<sup>19</sup>F NMR spectrum  
(564 MHz, CDCl<sub>3</sub>)

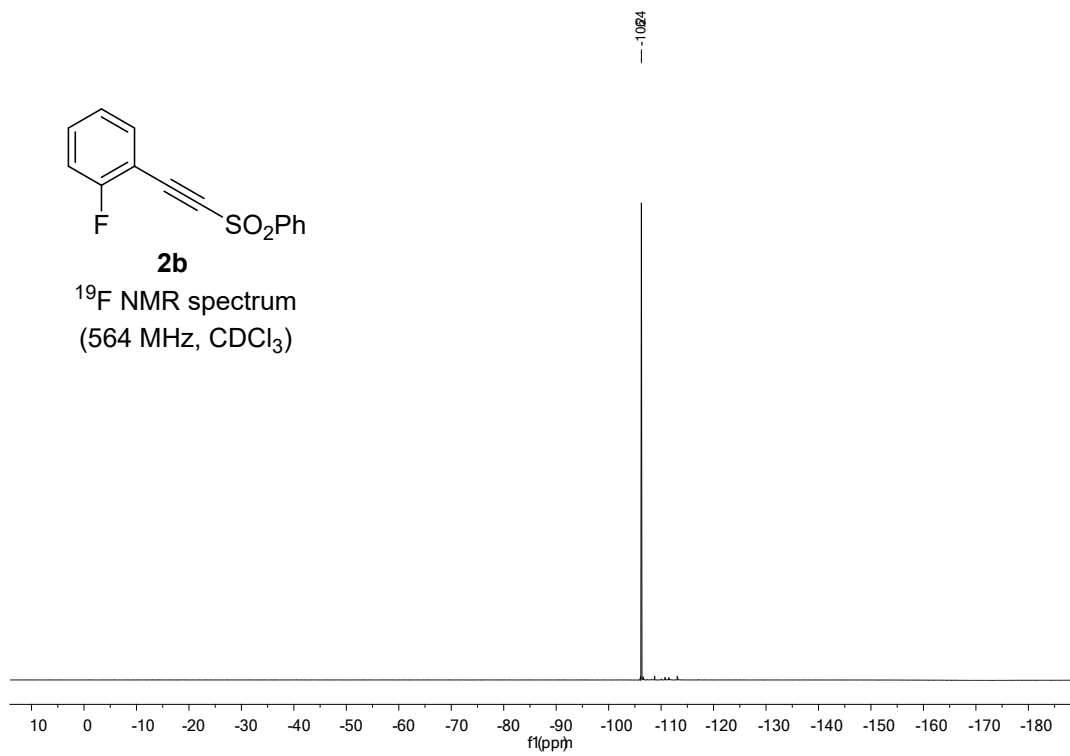



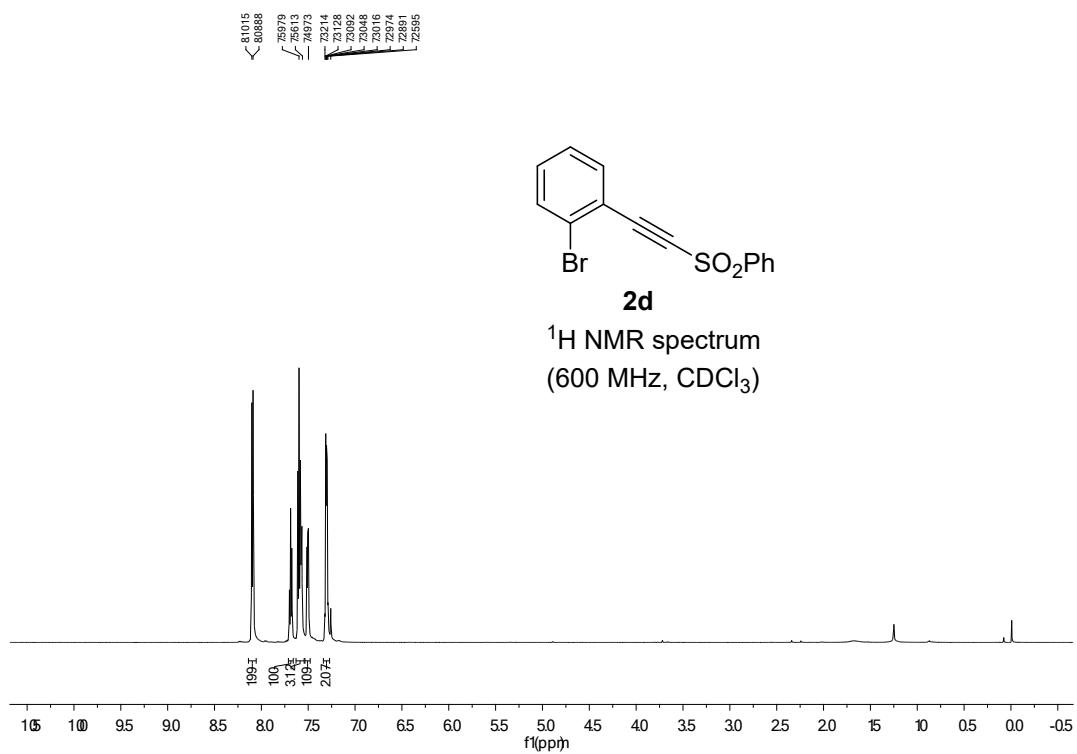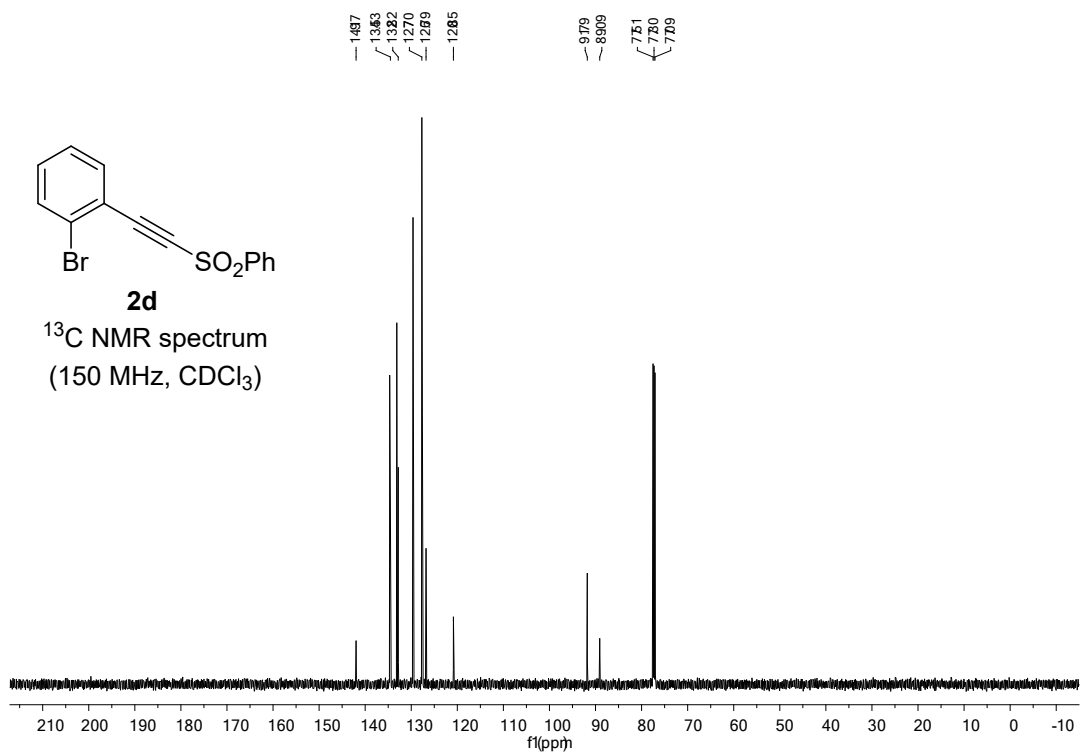



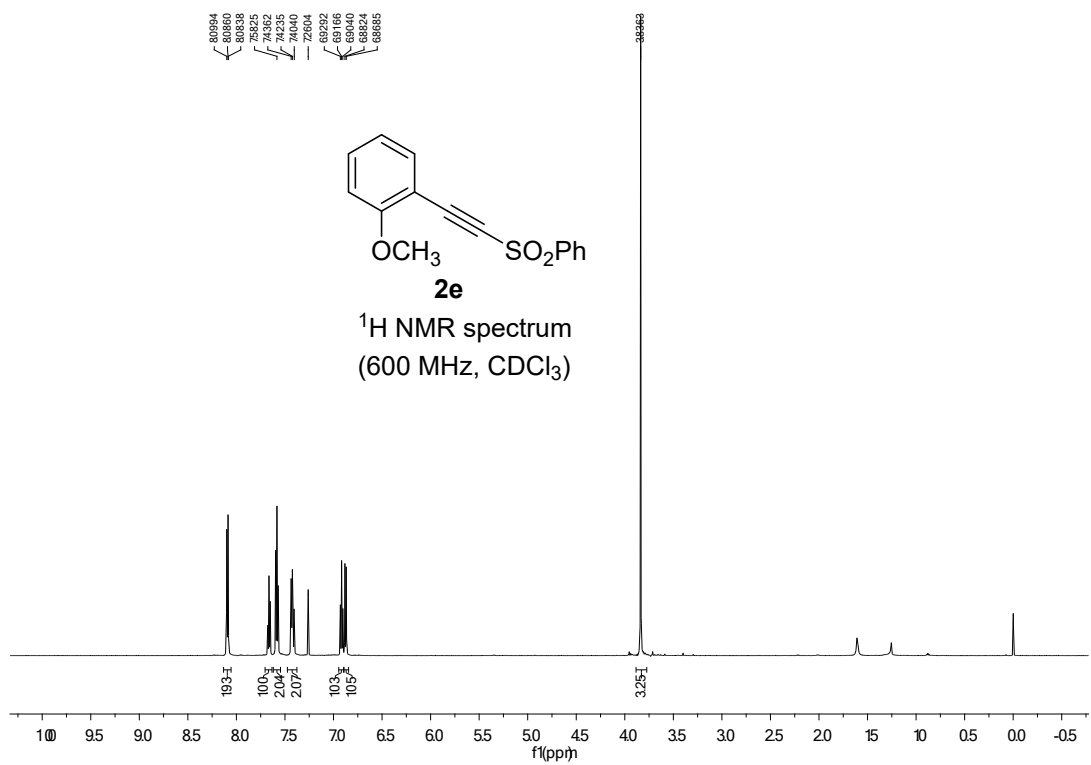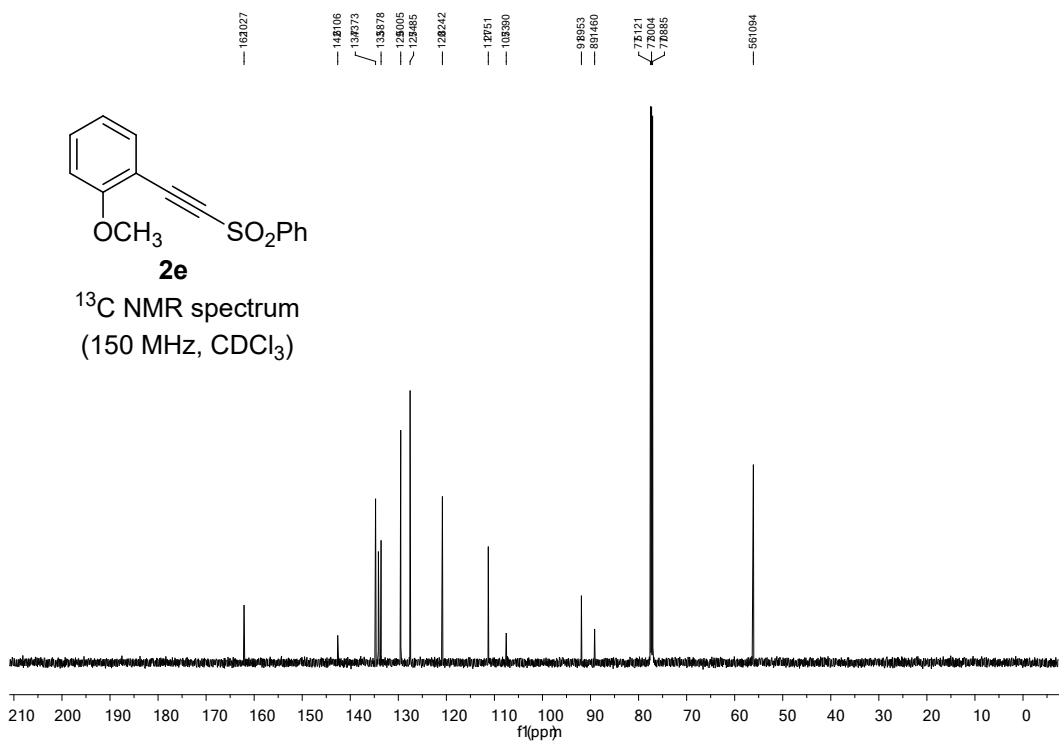



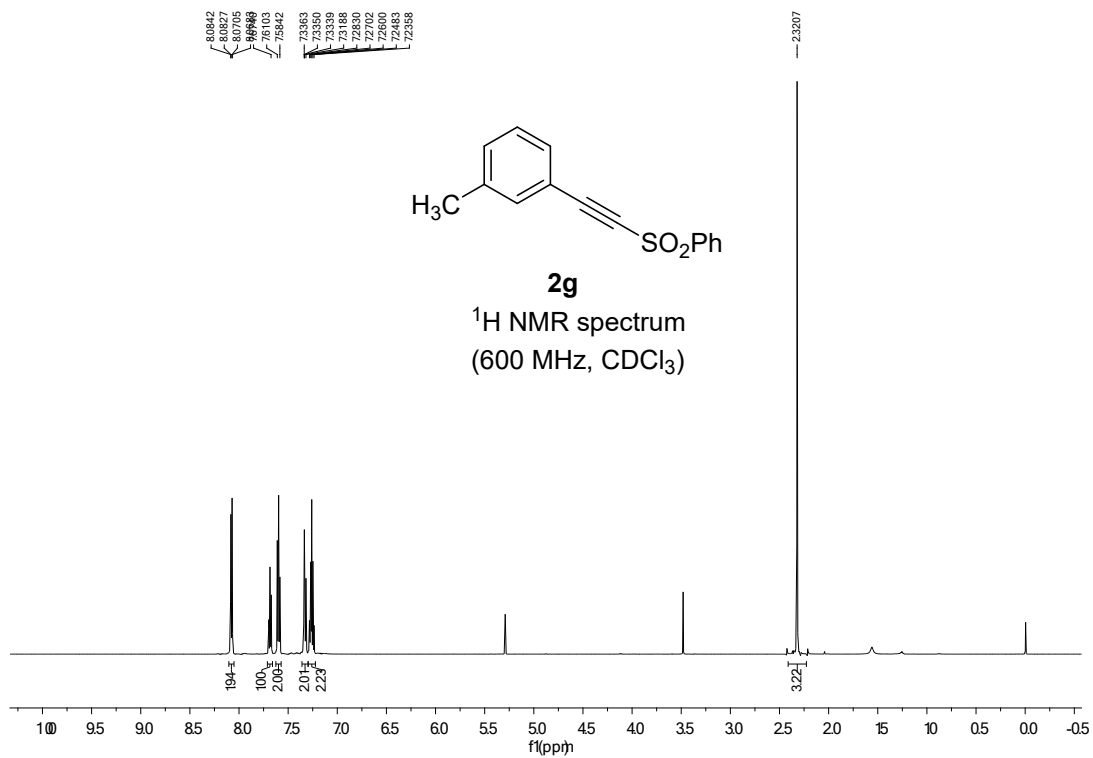

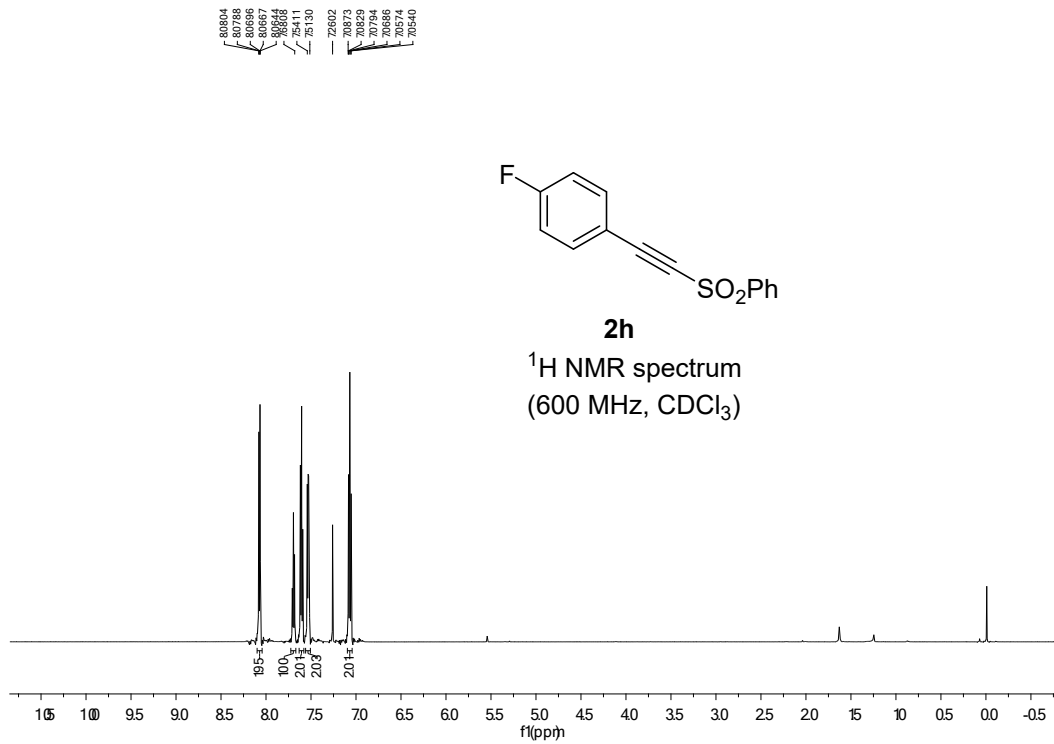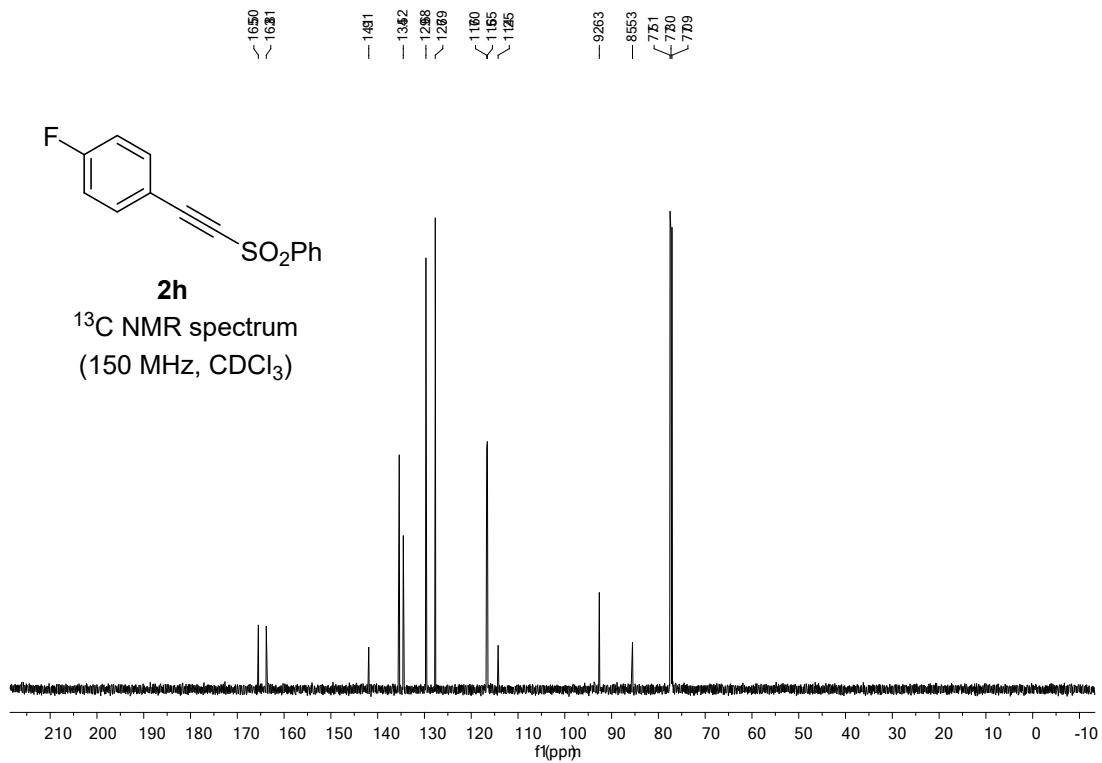

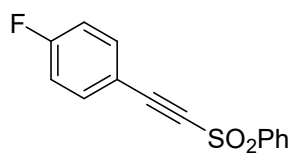

**2h**  
<sup>19</sup>F NMR spectrum  
(564 MHz, CDCl<sub>3</sub>)

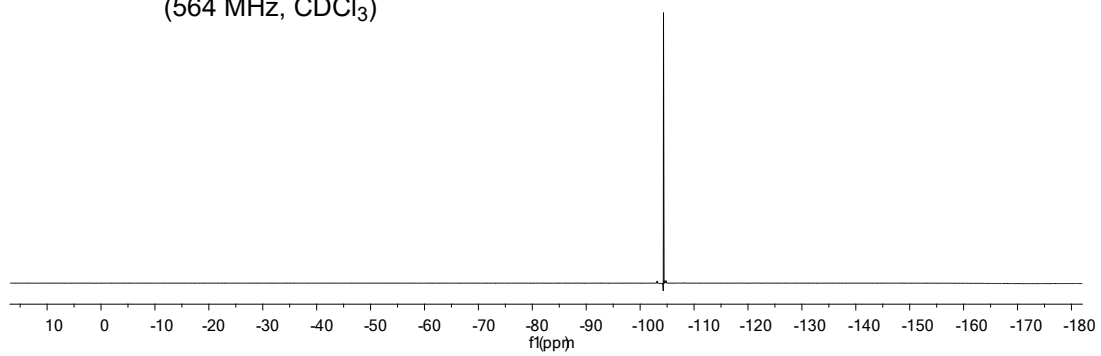

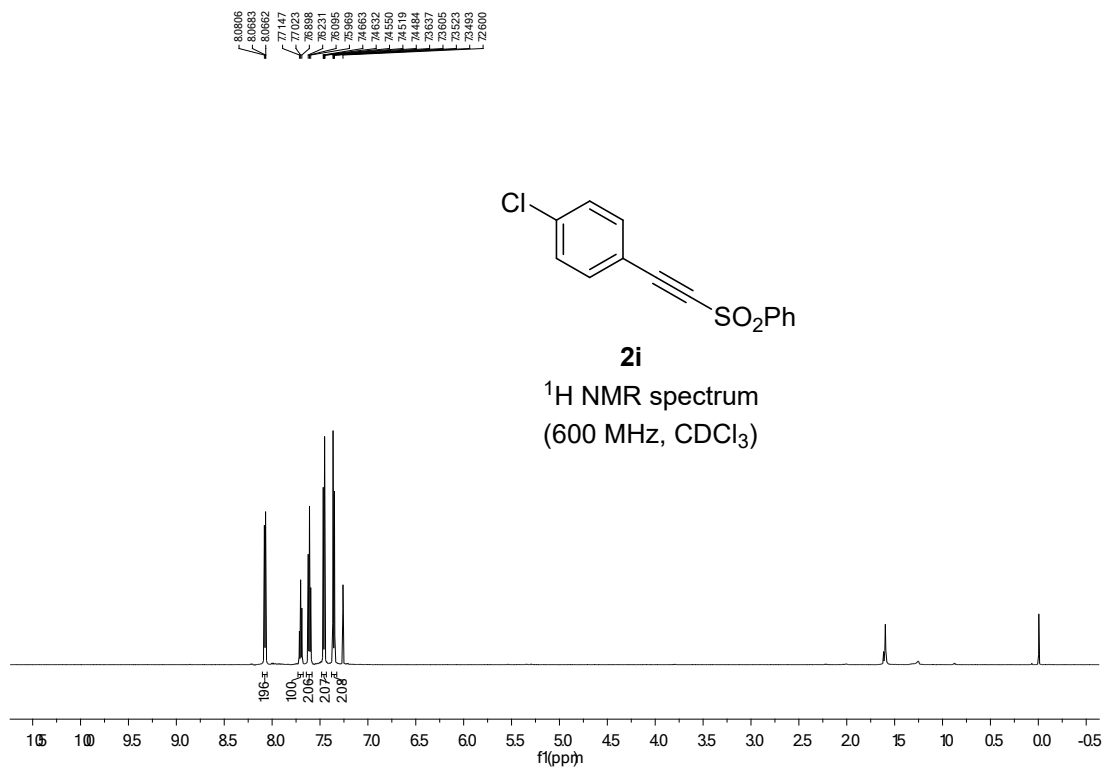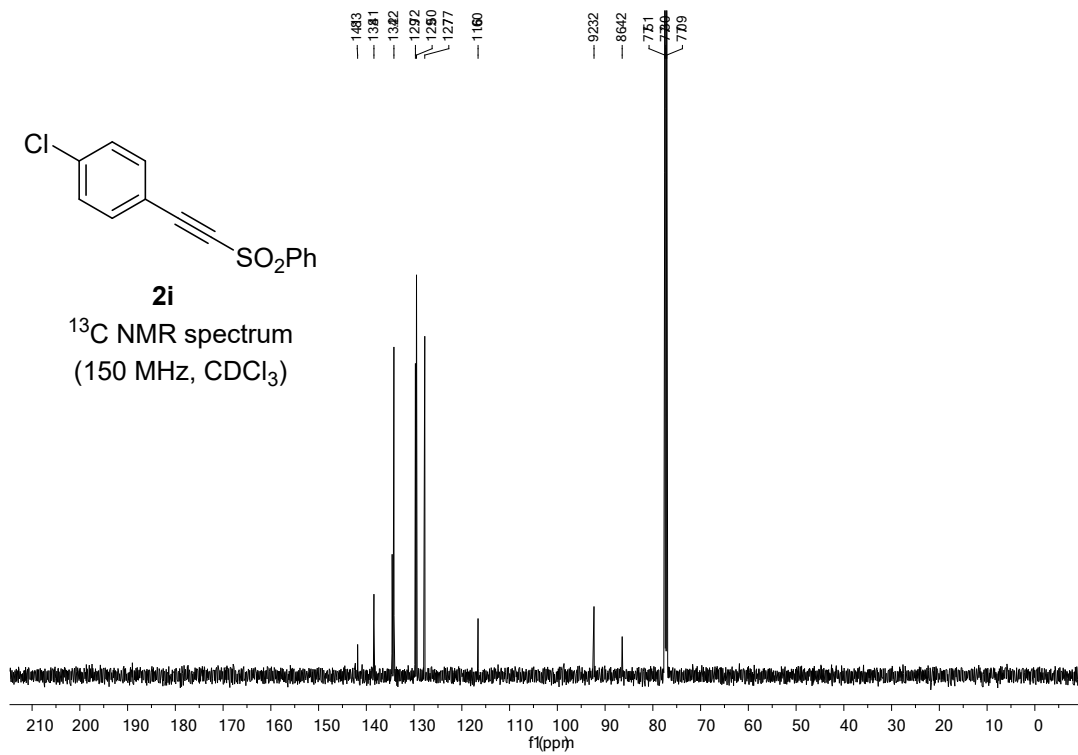

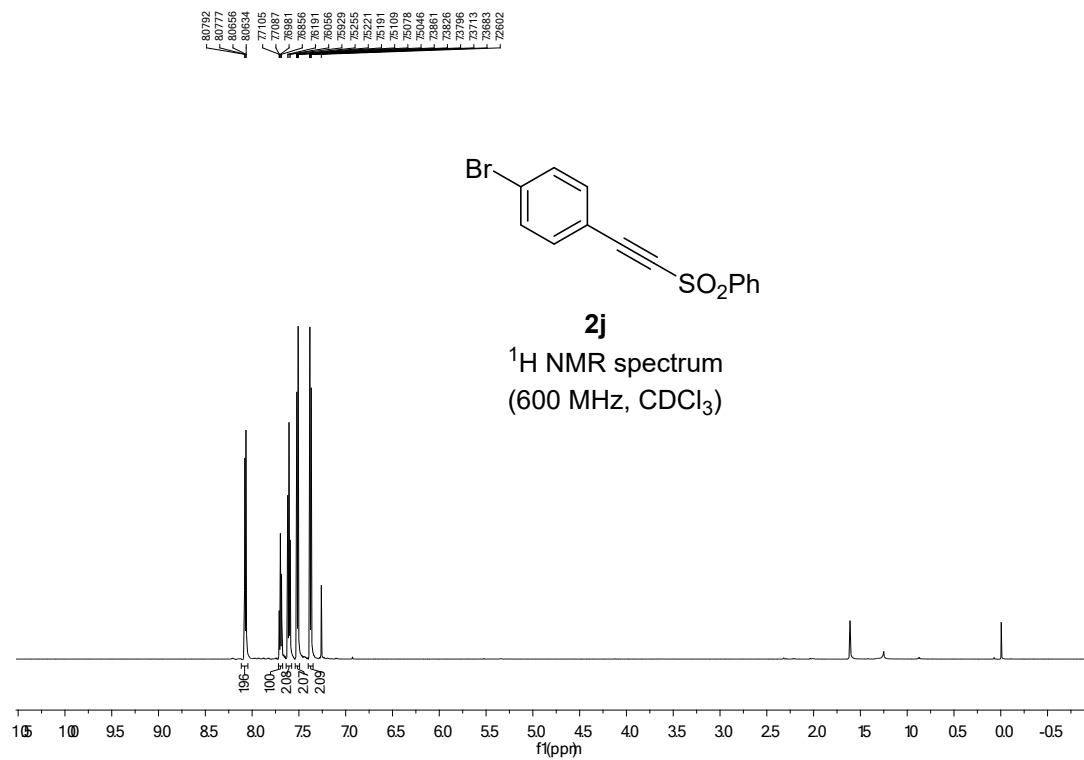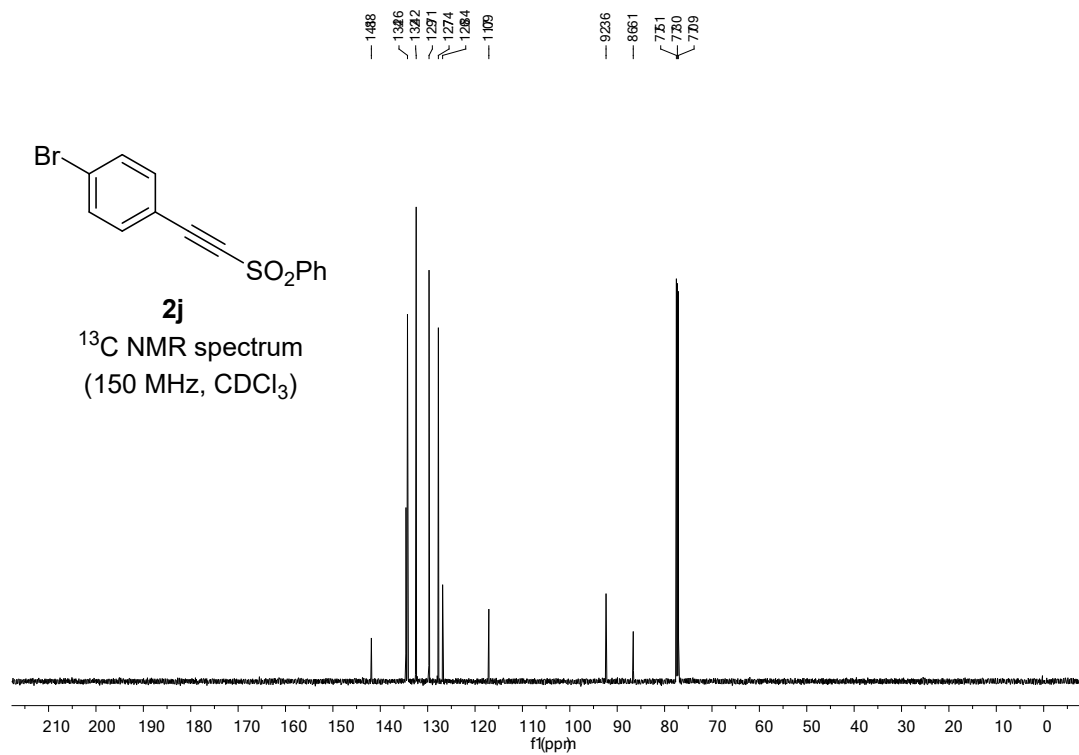

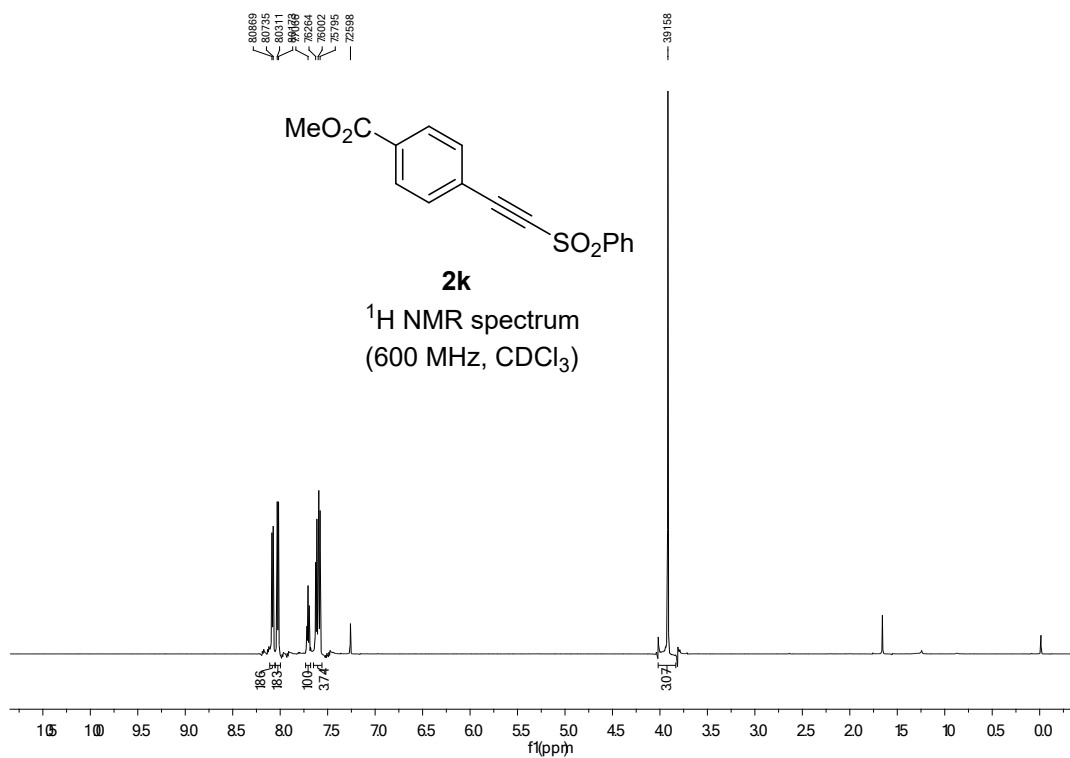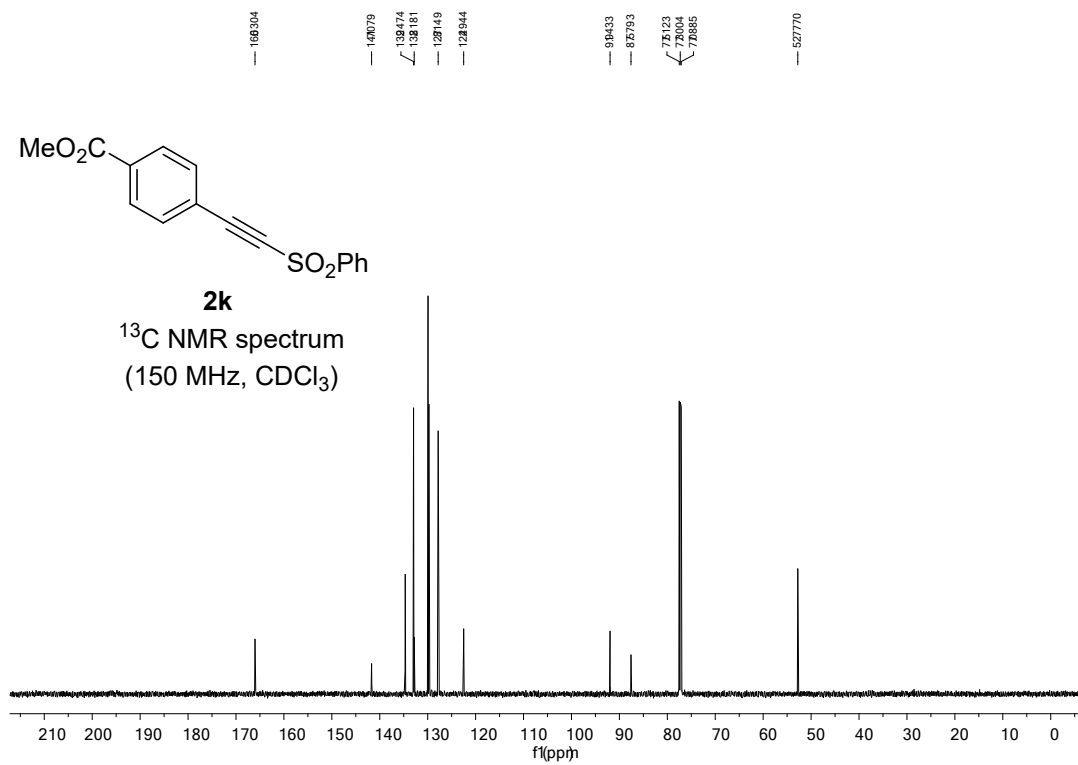



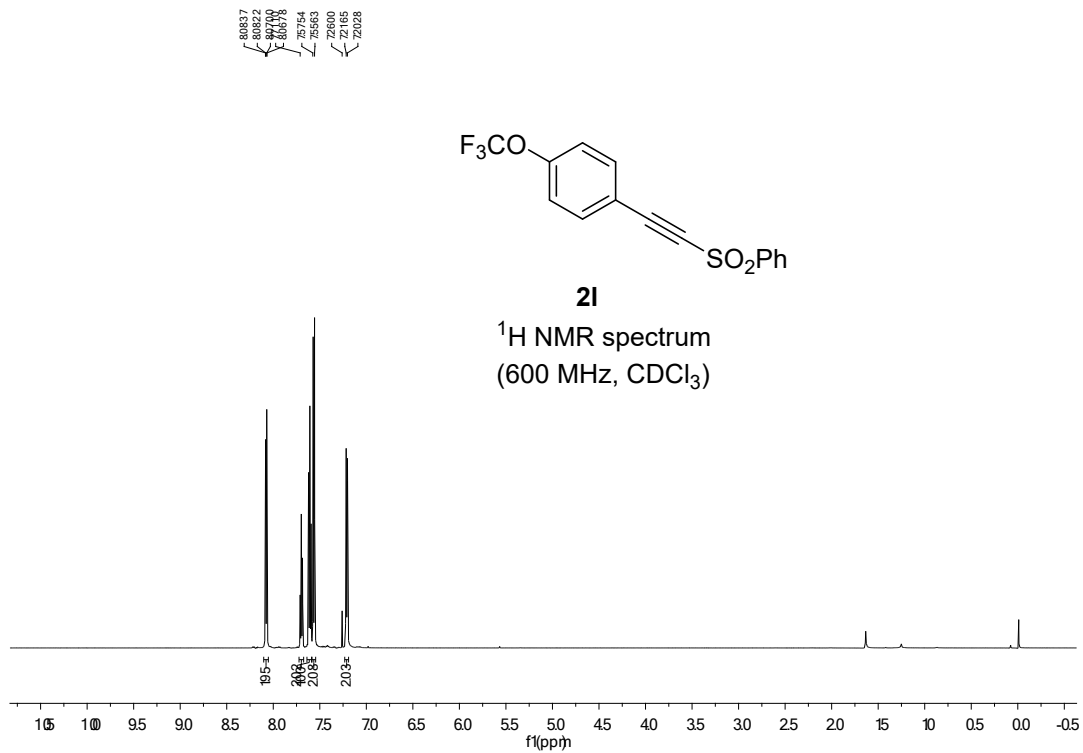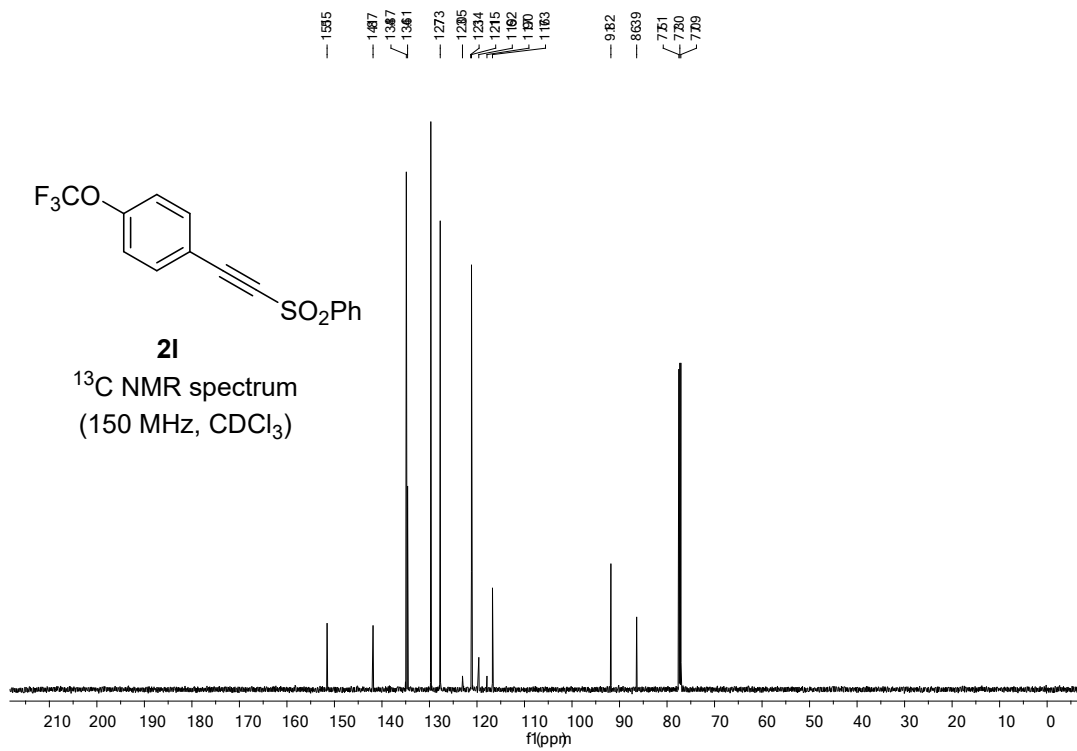

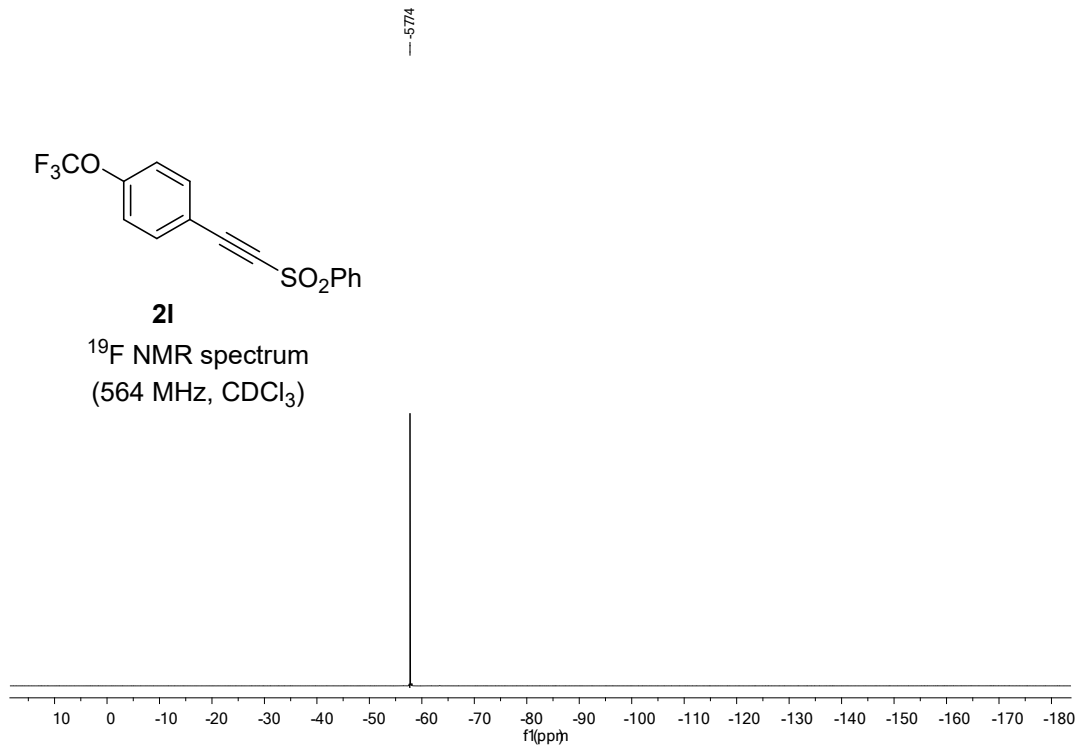

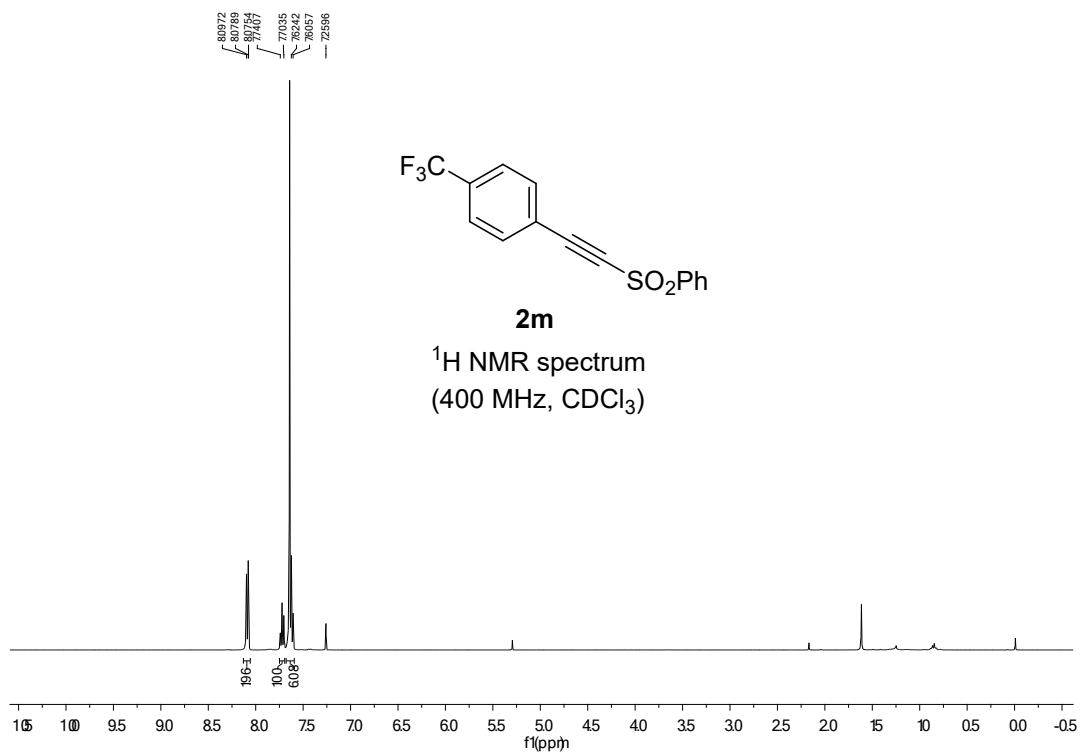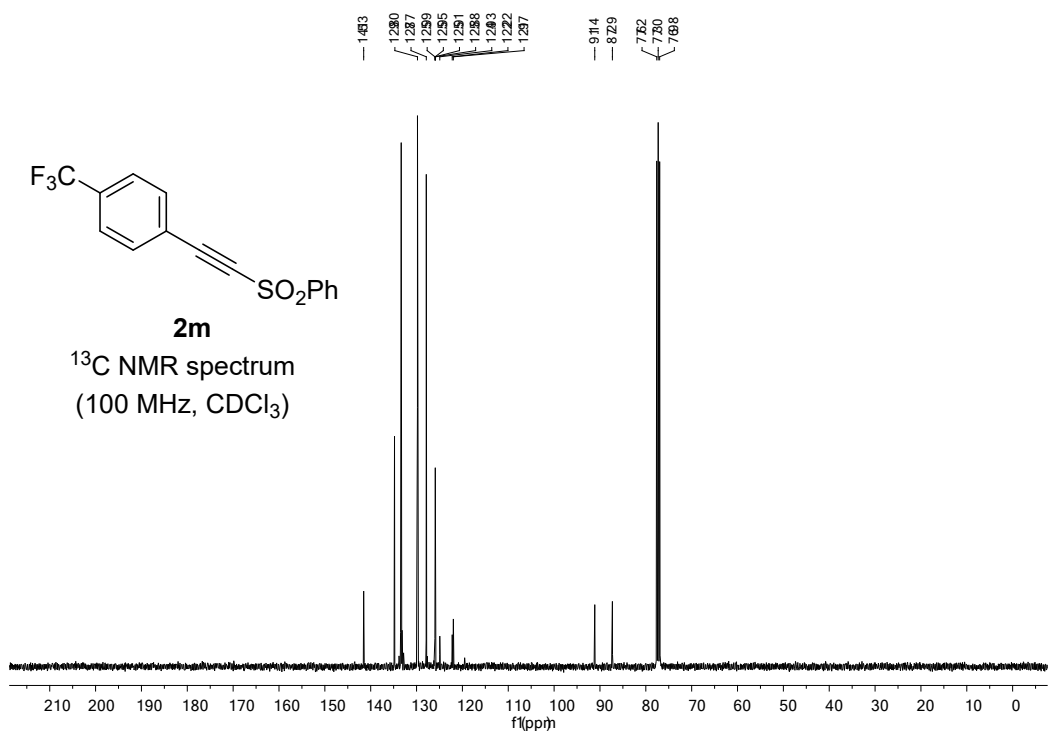

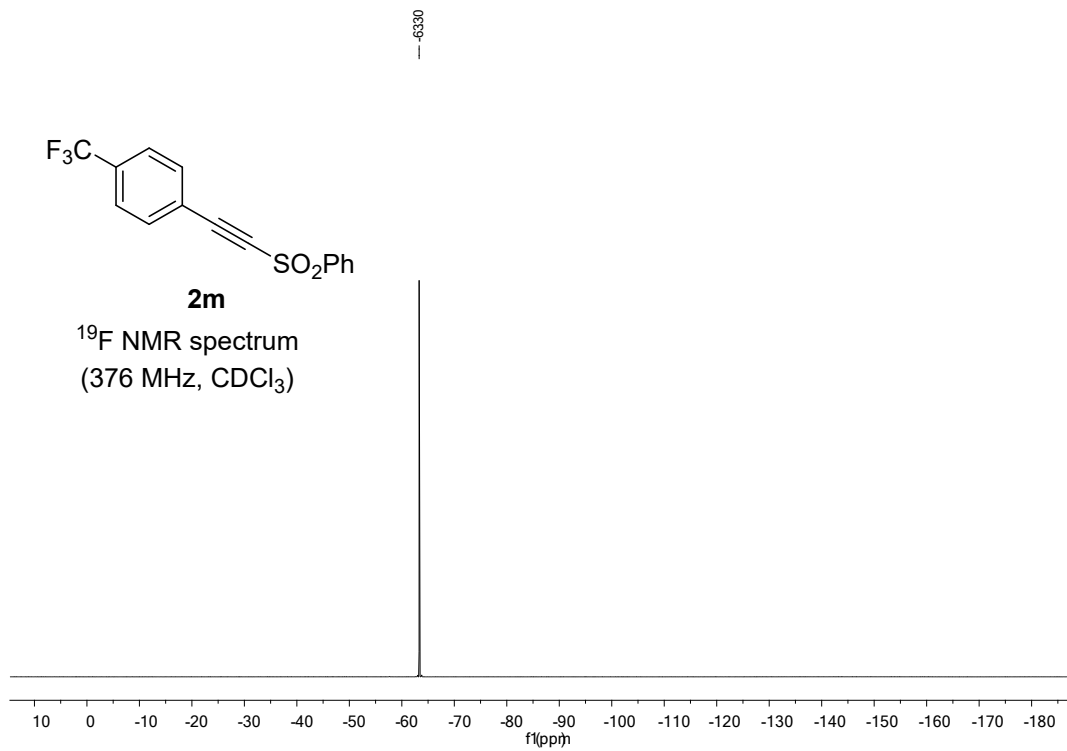

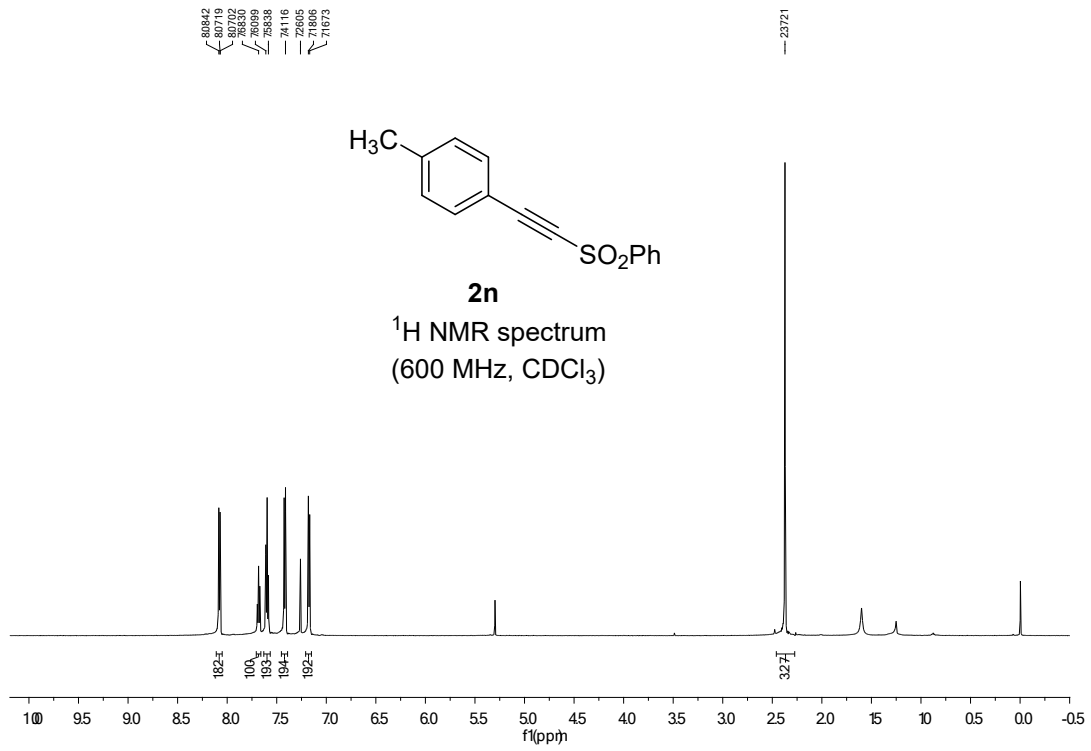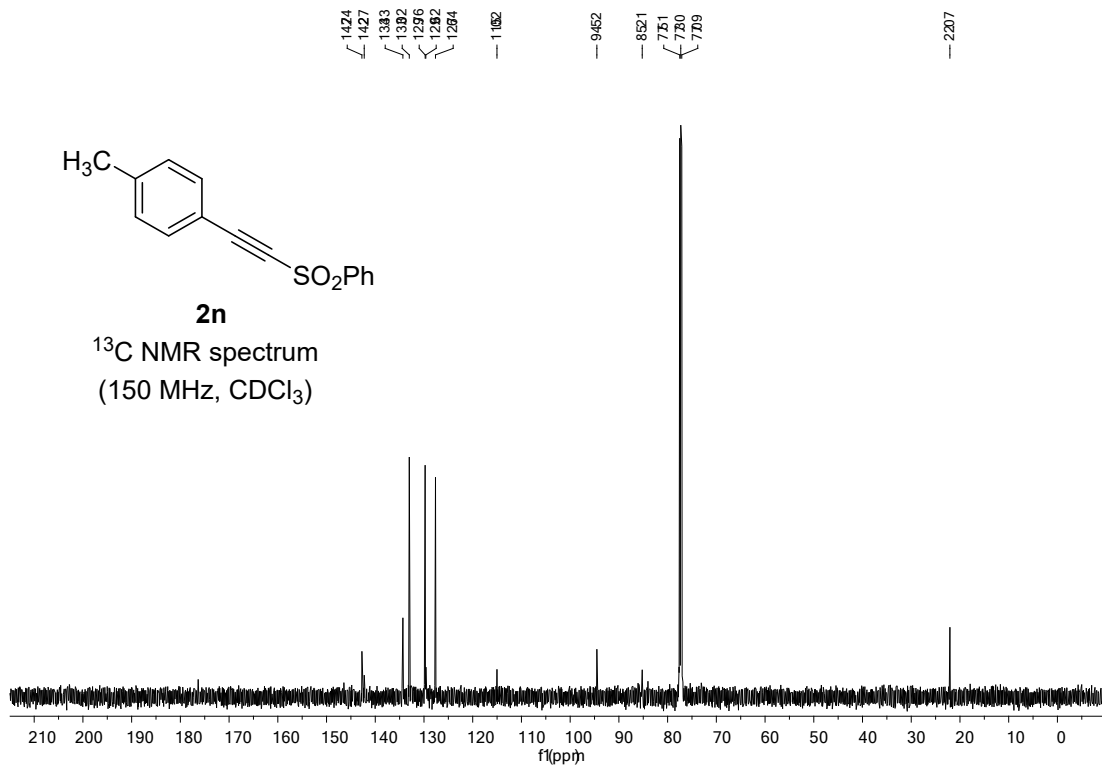

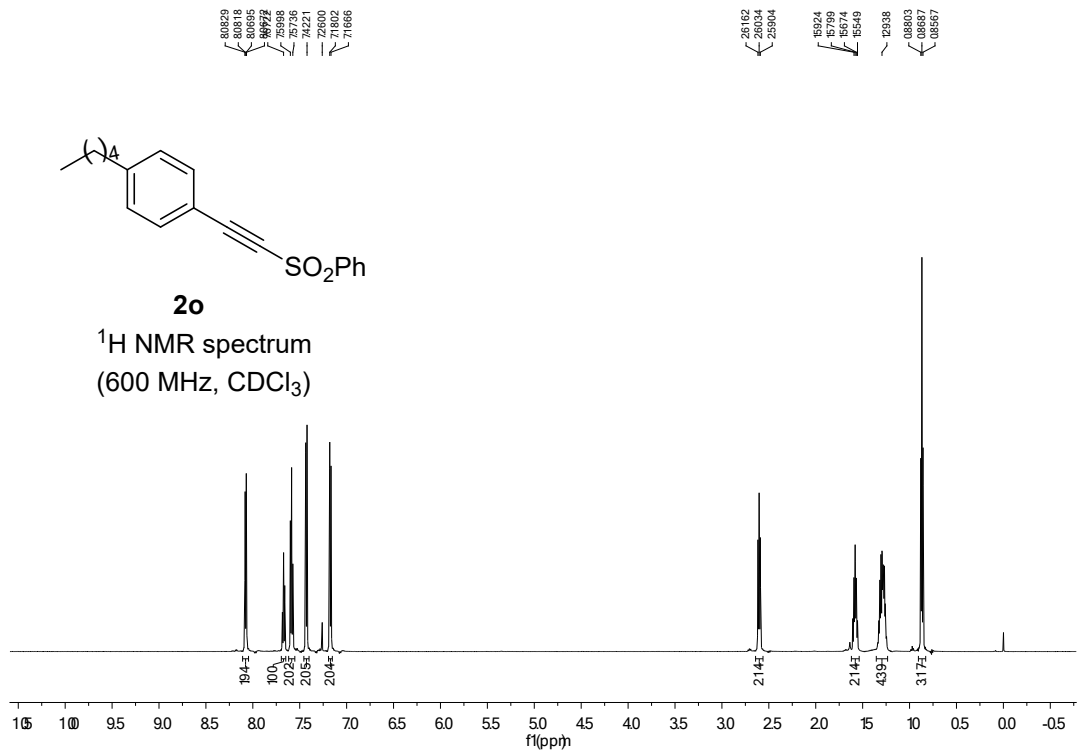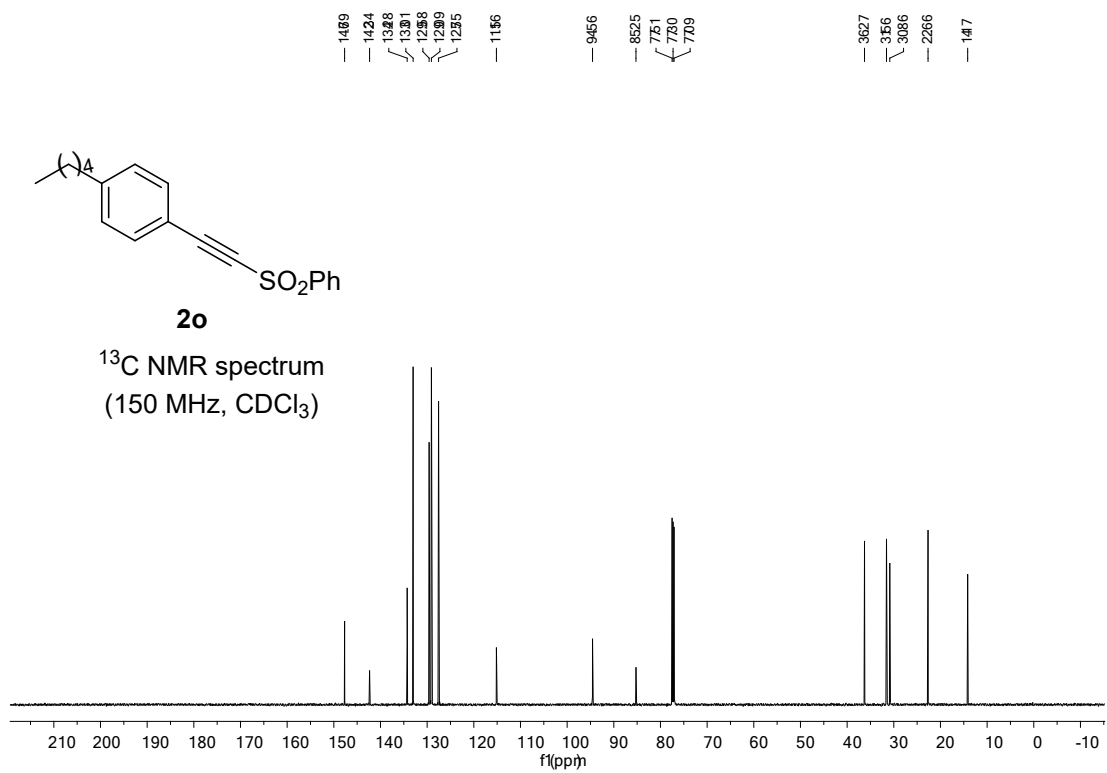

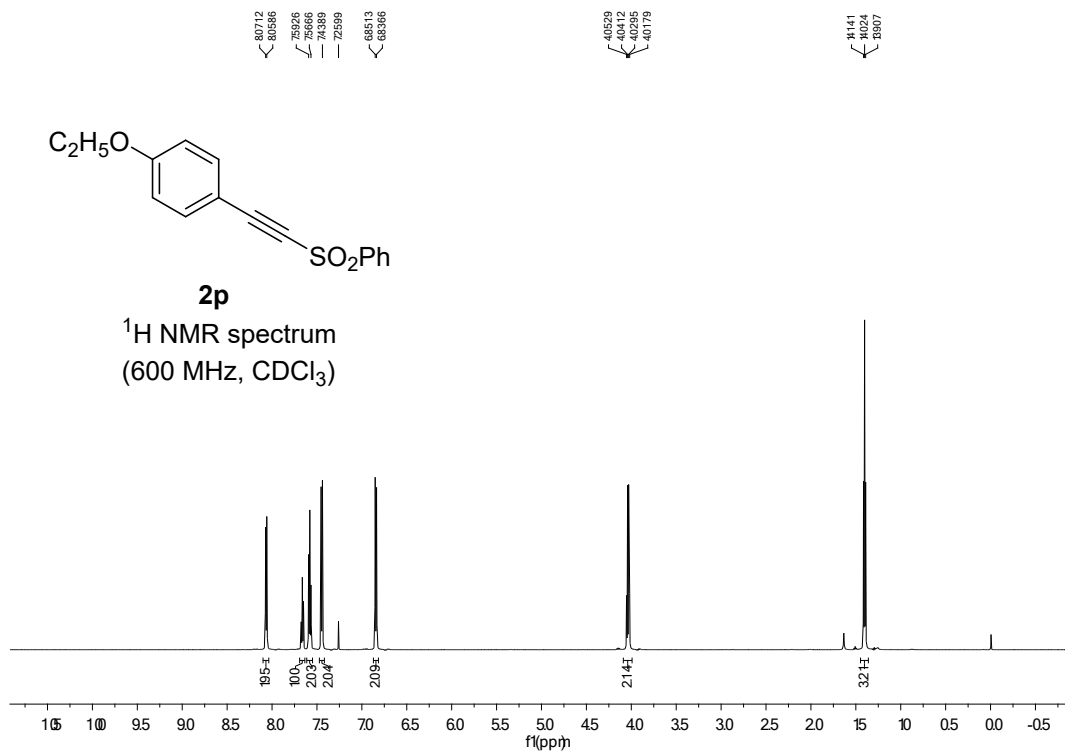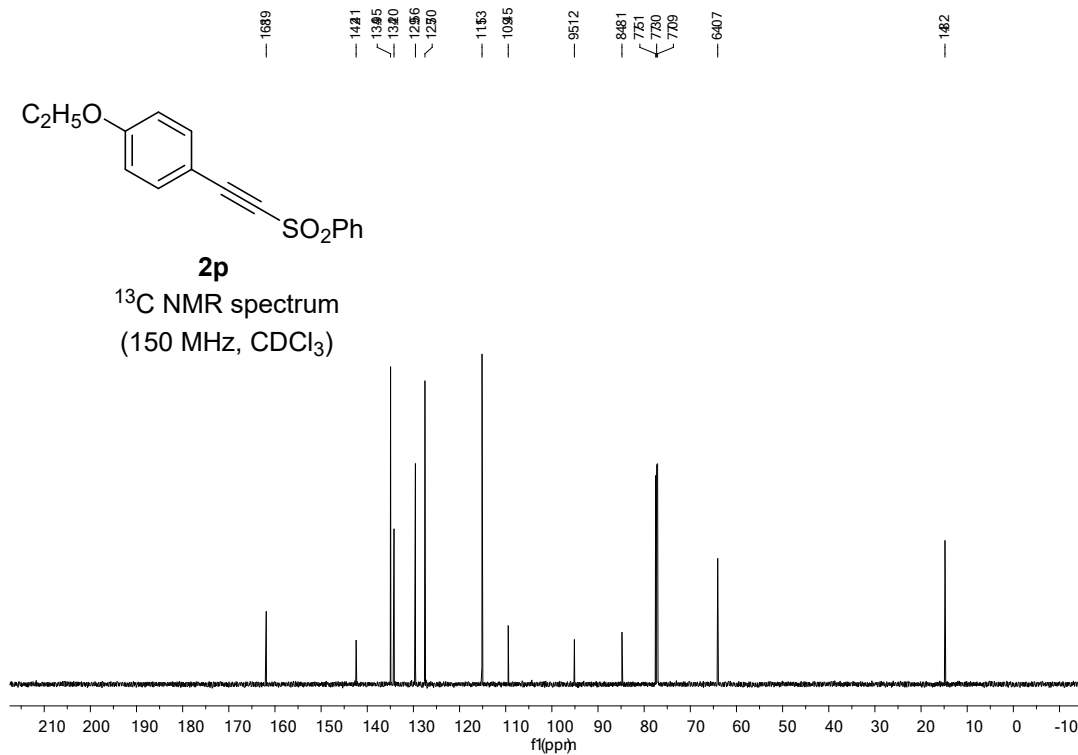

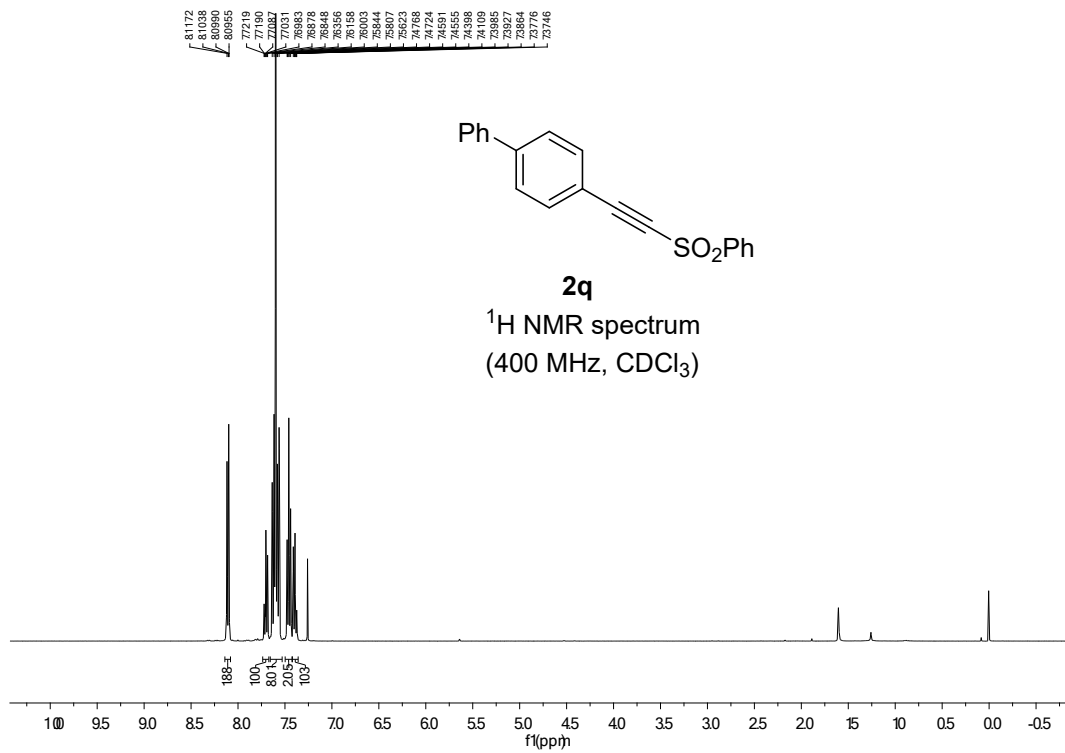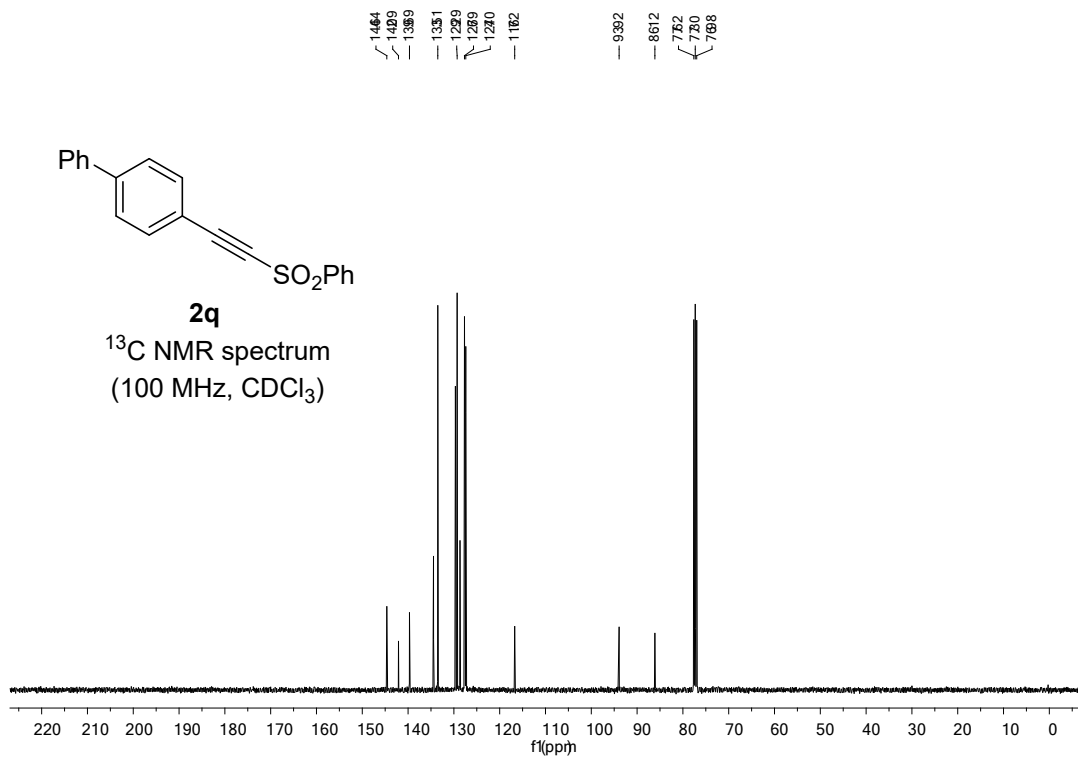



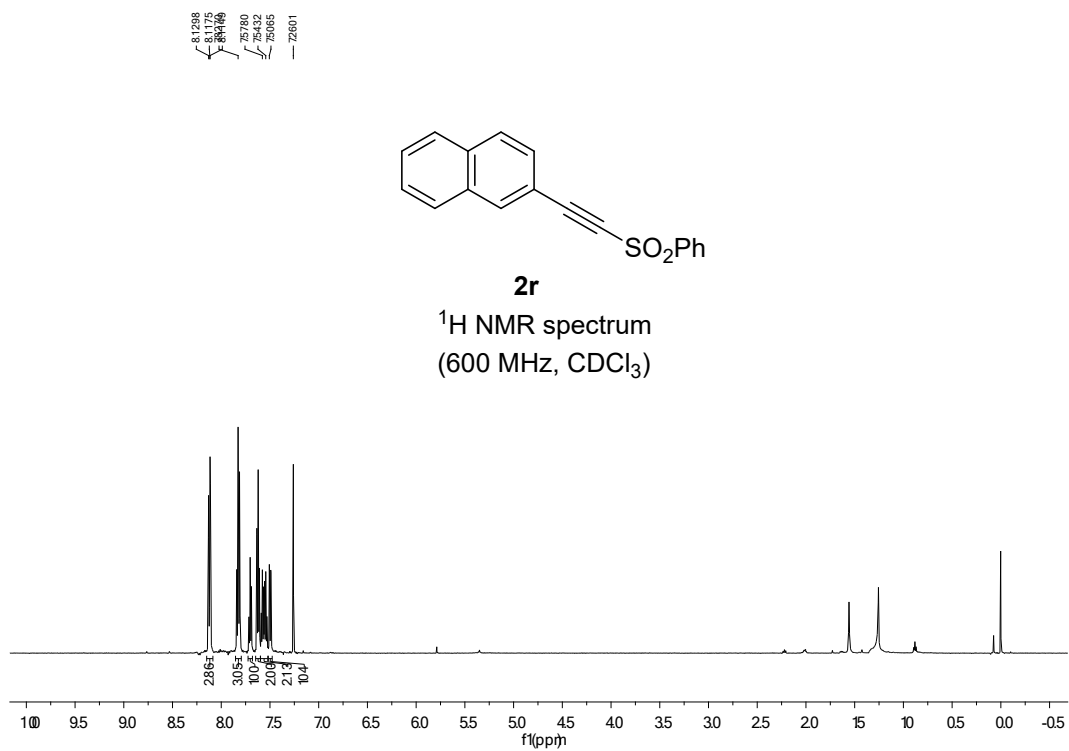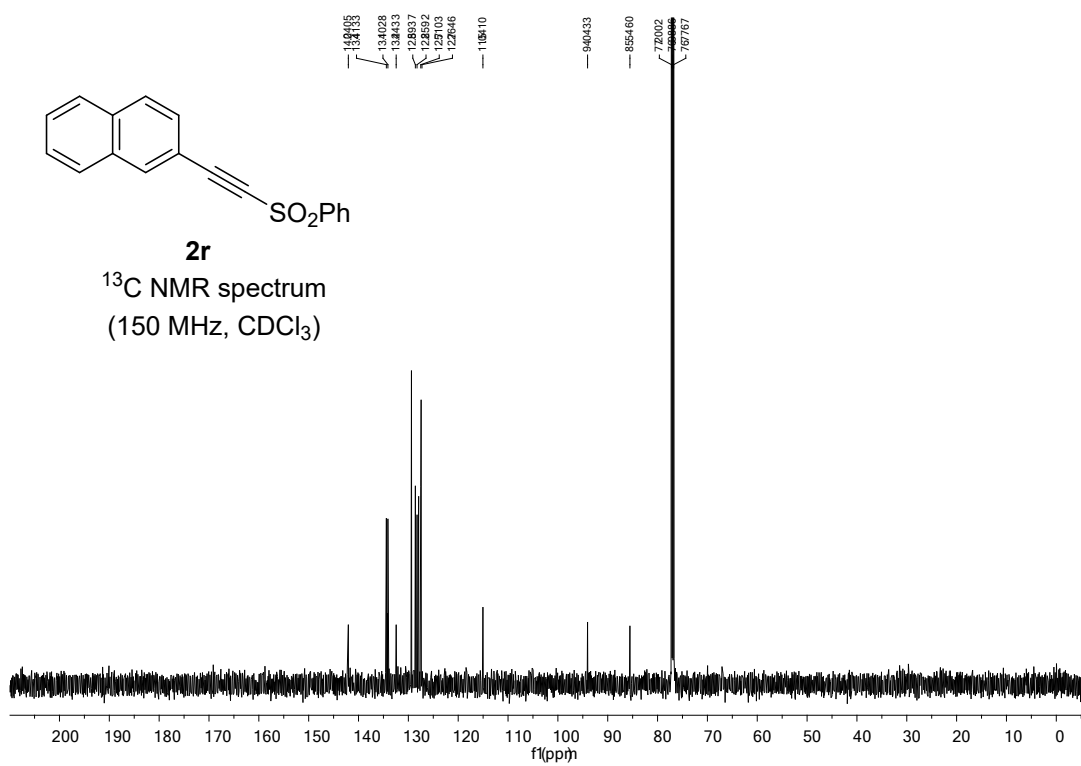

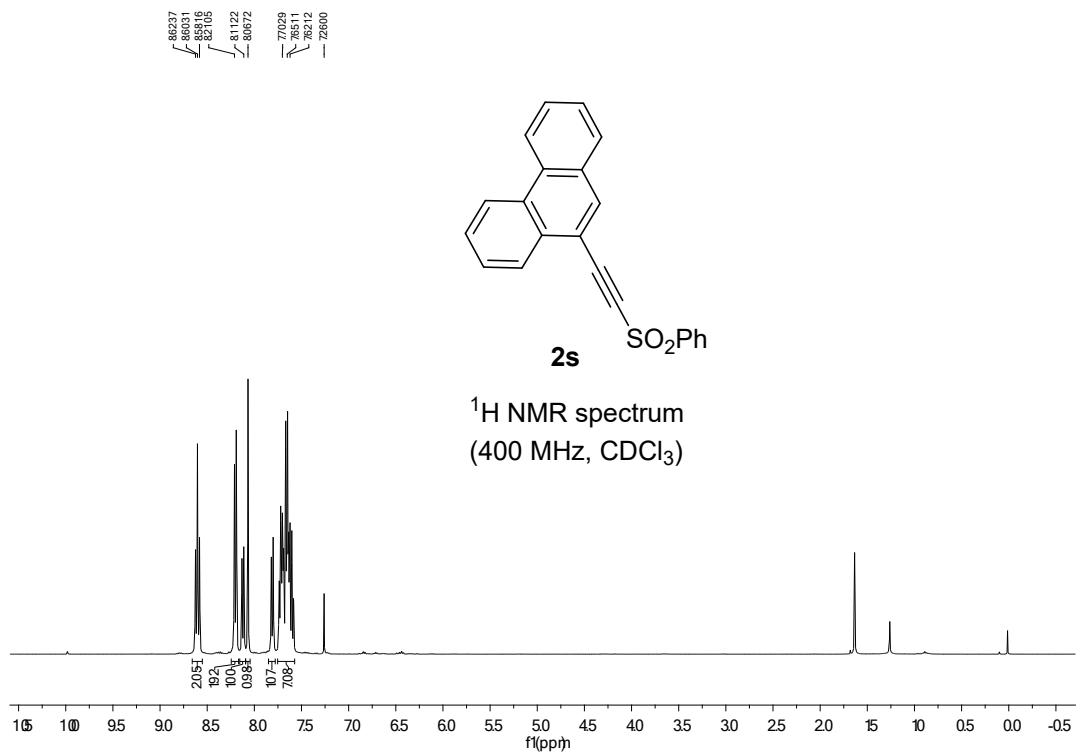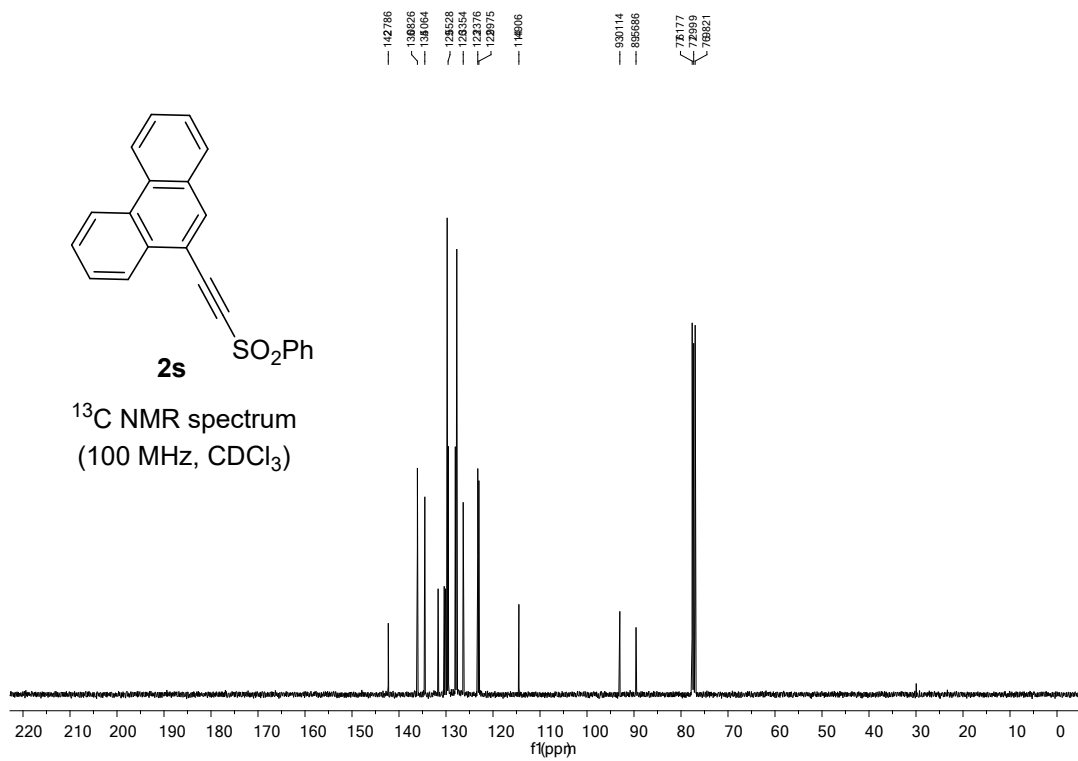

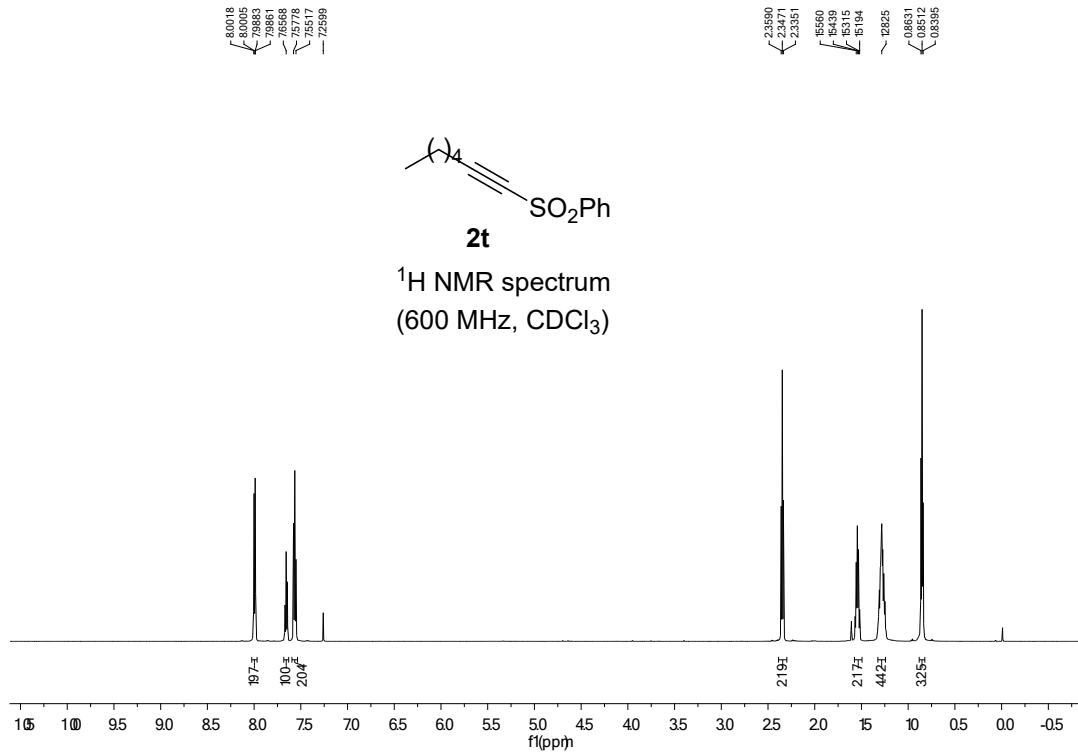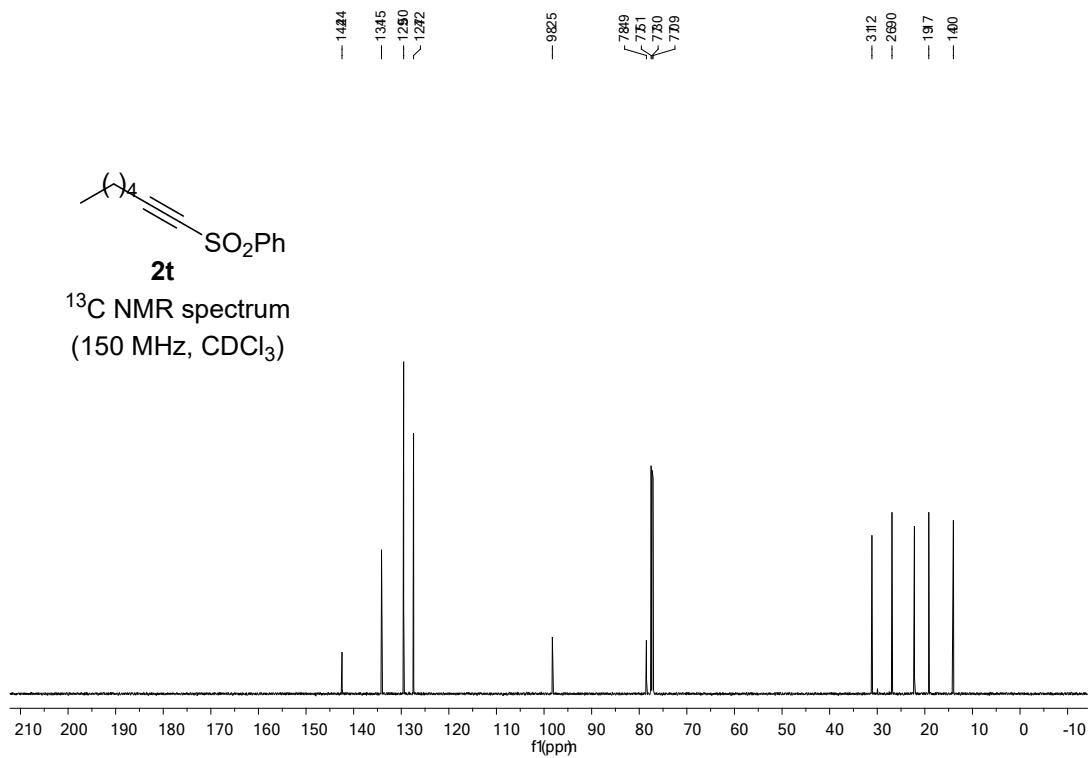

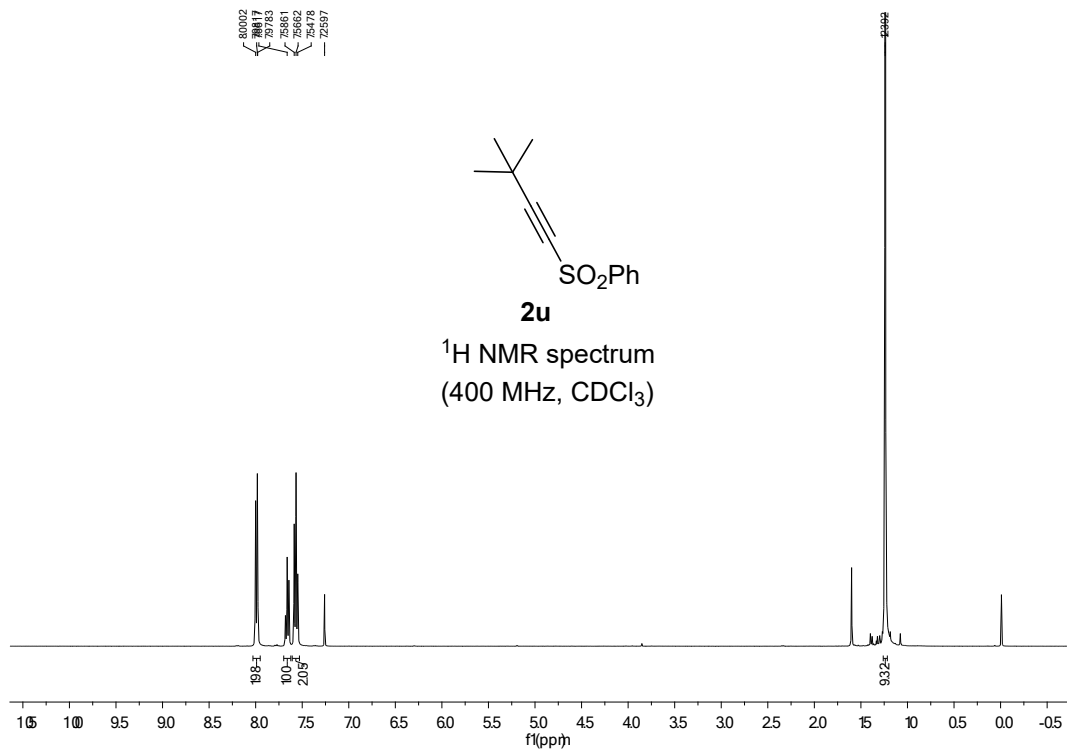



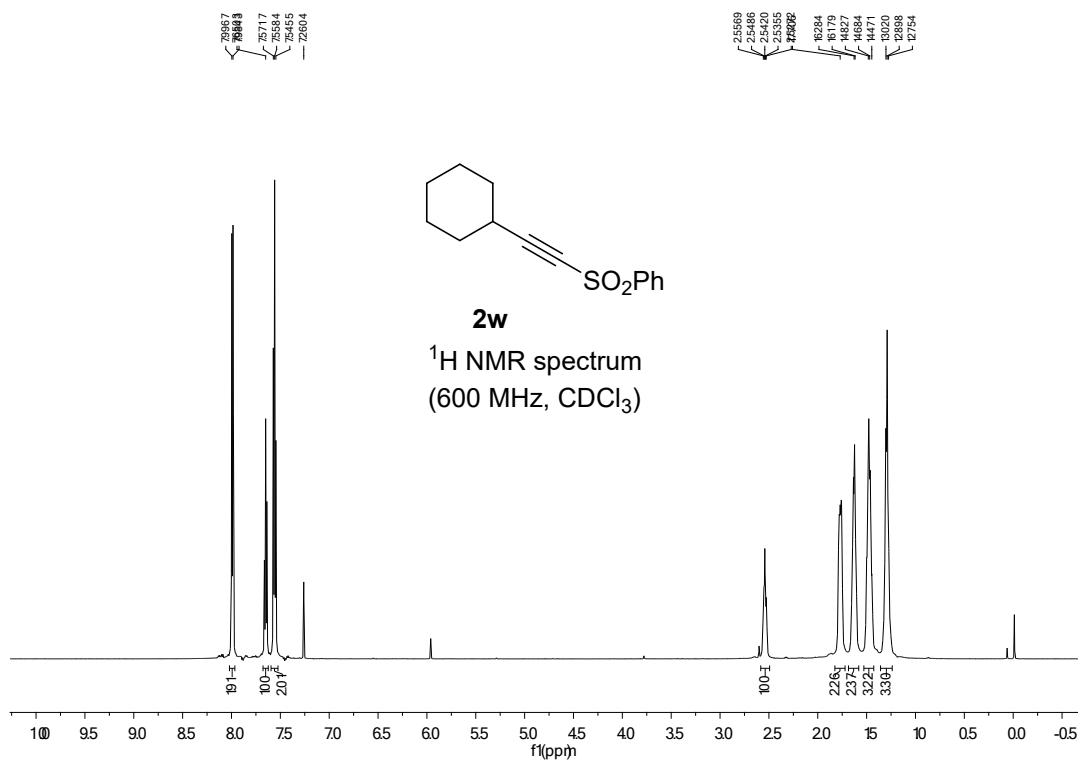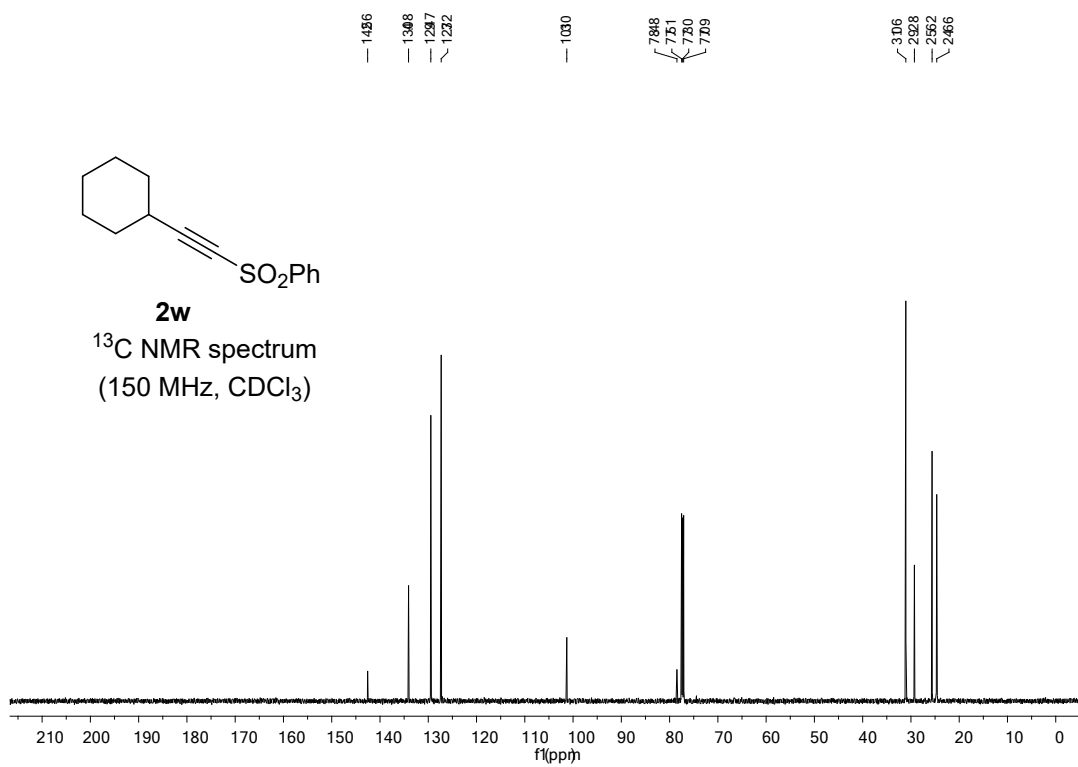

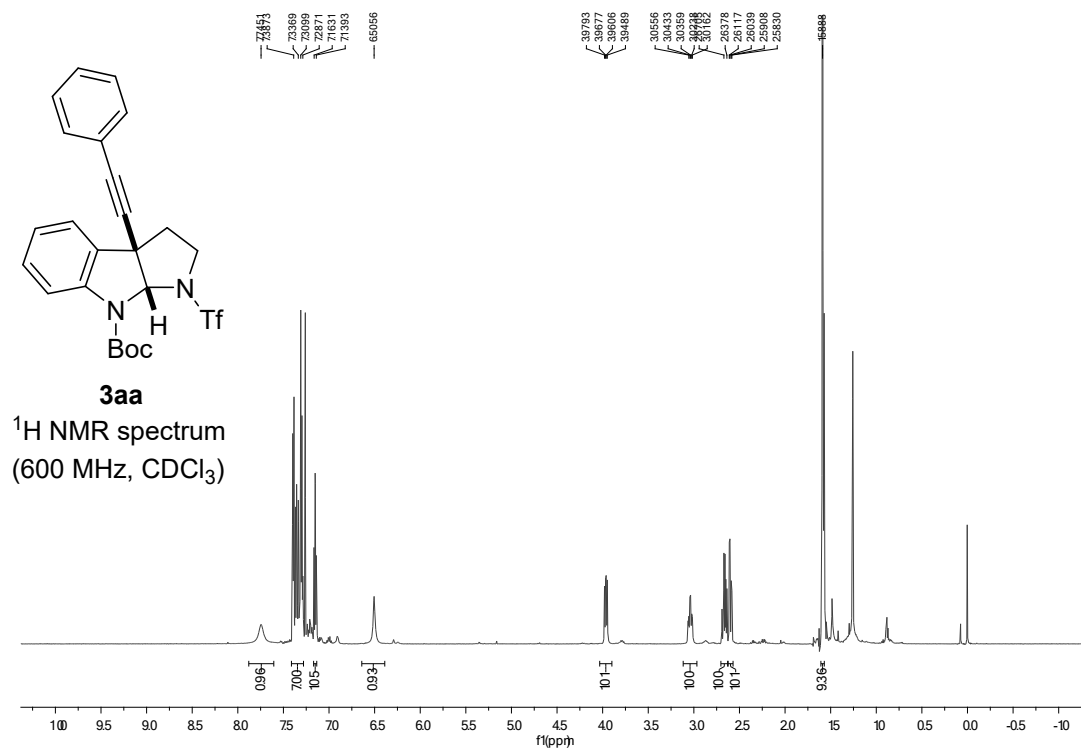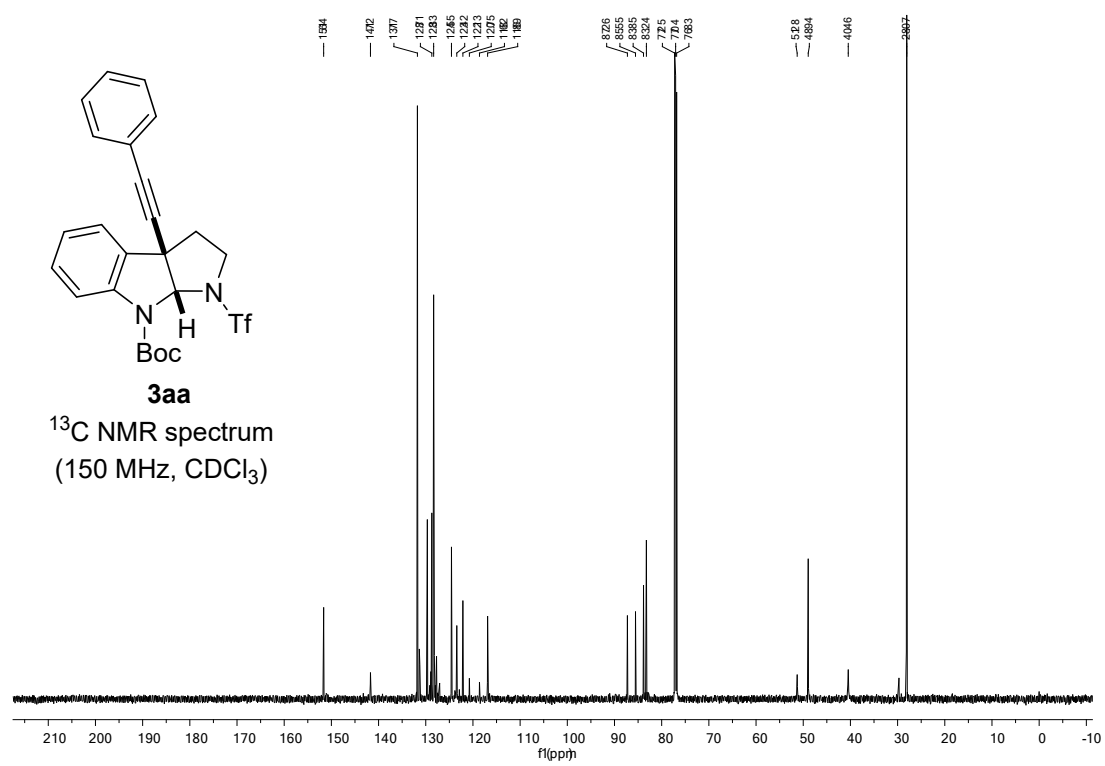

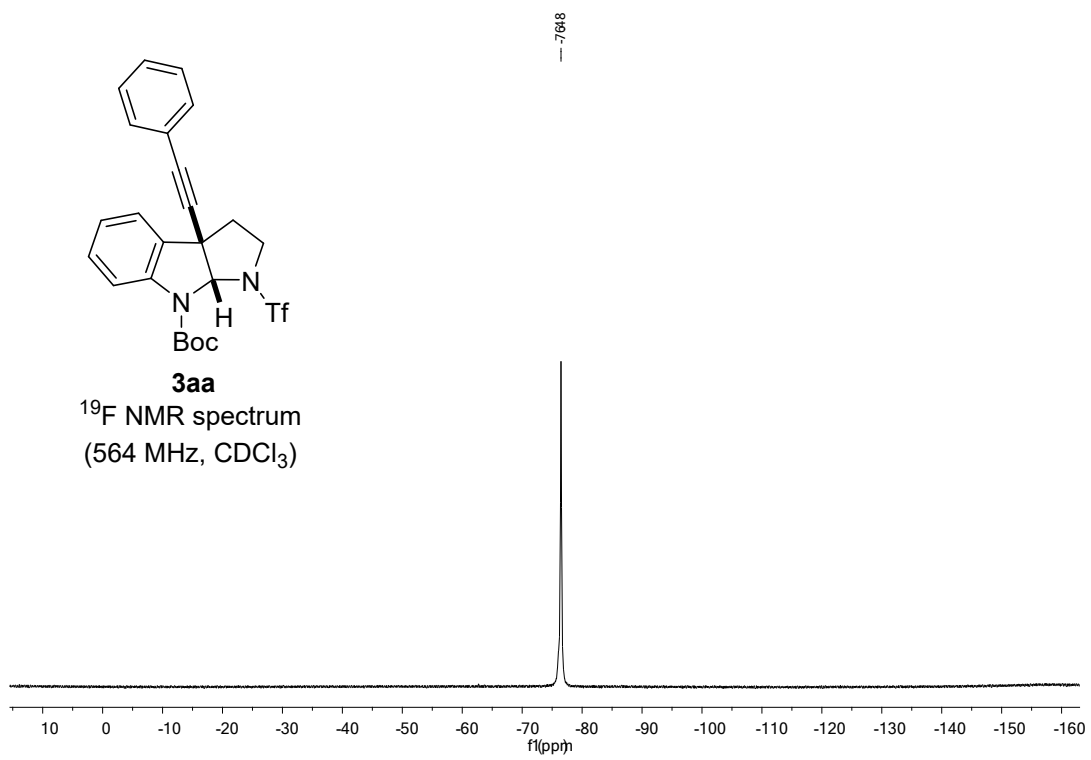





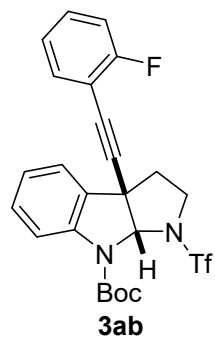

<sup>19</sup>F NMR spectrum  
(564 MHz, CDCl<sub>3</sub>)

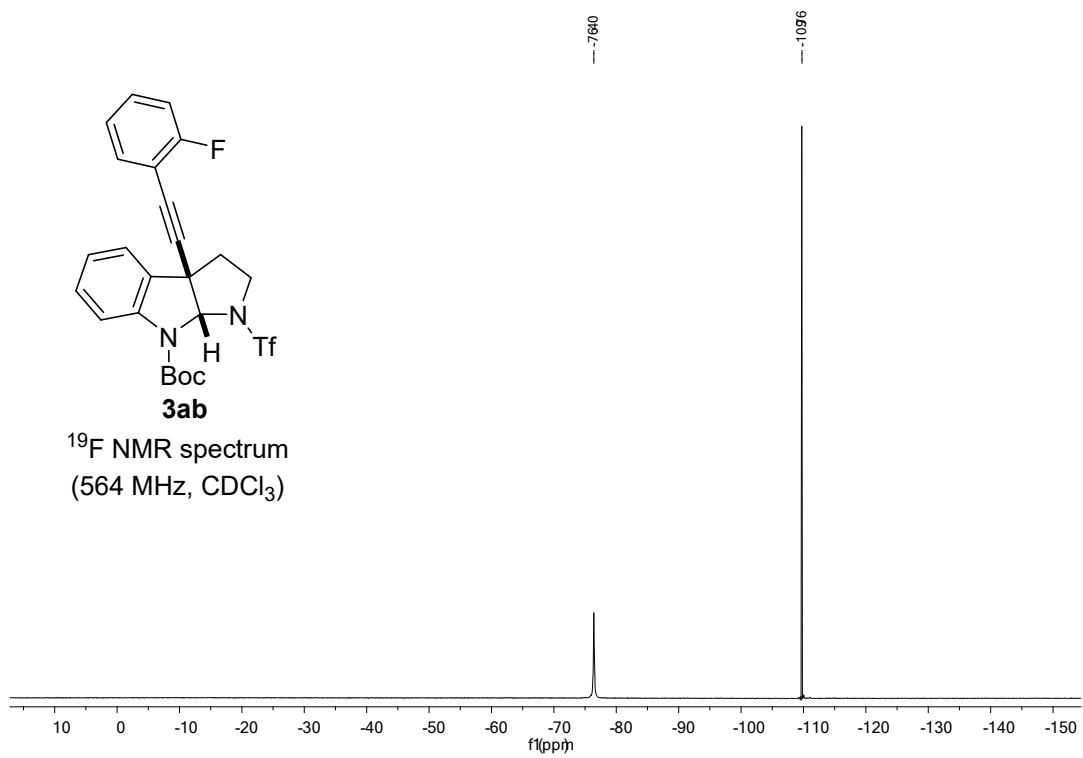

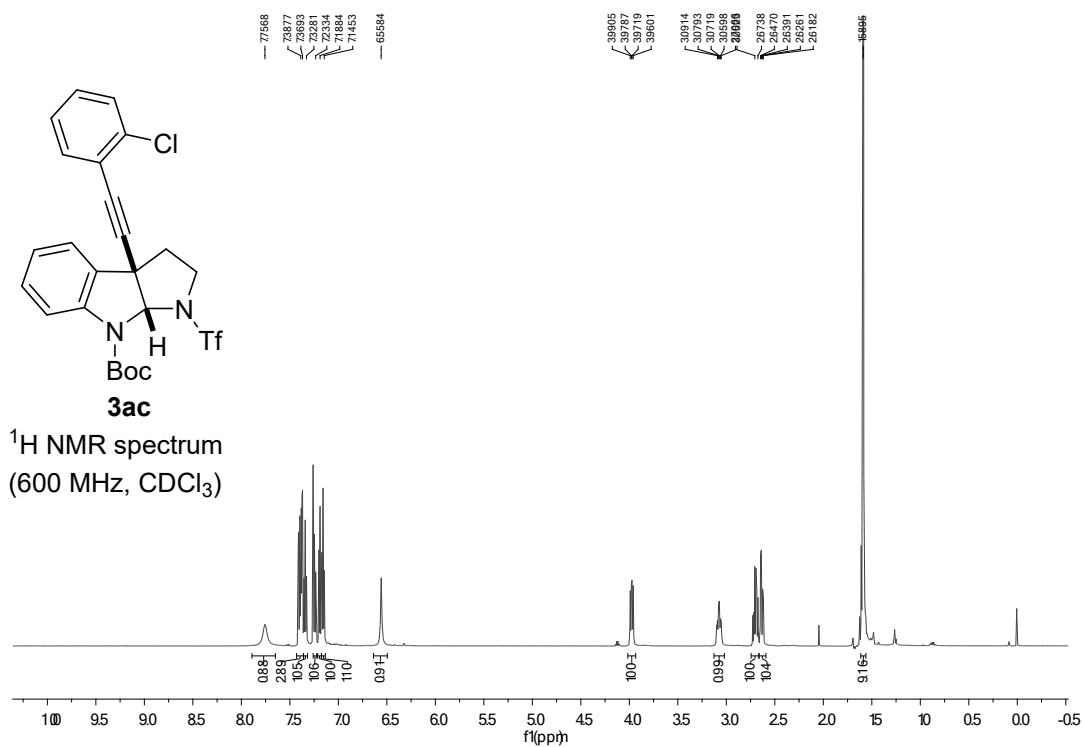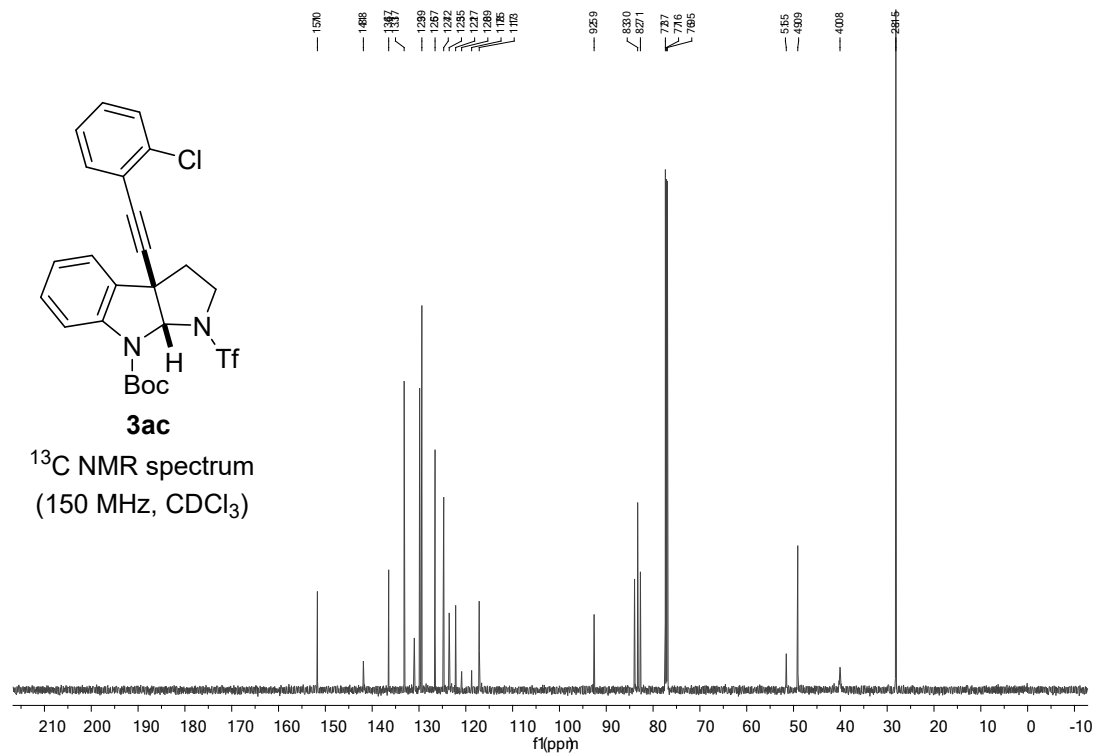

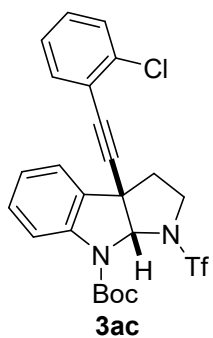

<sup>19</sup>F NMR spectrum  
(564 MHz, CDCl<sub>3</sub>)

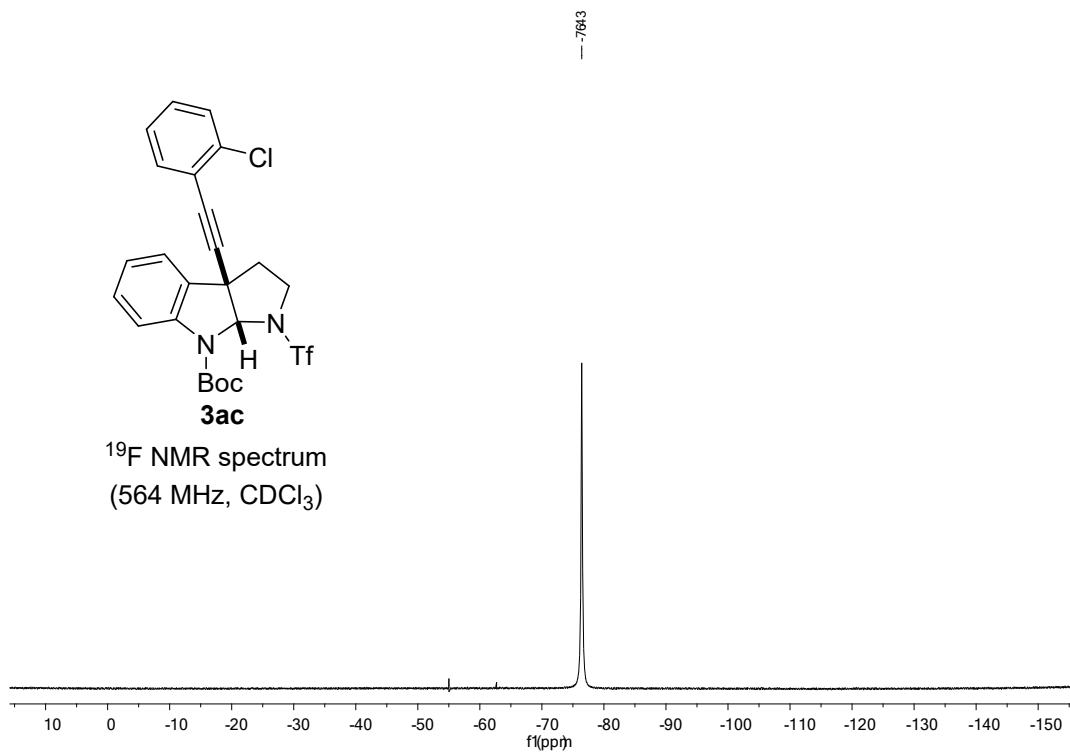



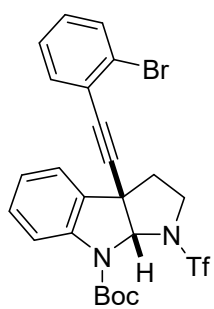

**3ad**

<sup>19</sup>F NMR spectrum  
(564 MHz, CDCl<sub>3</sub>)

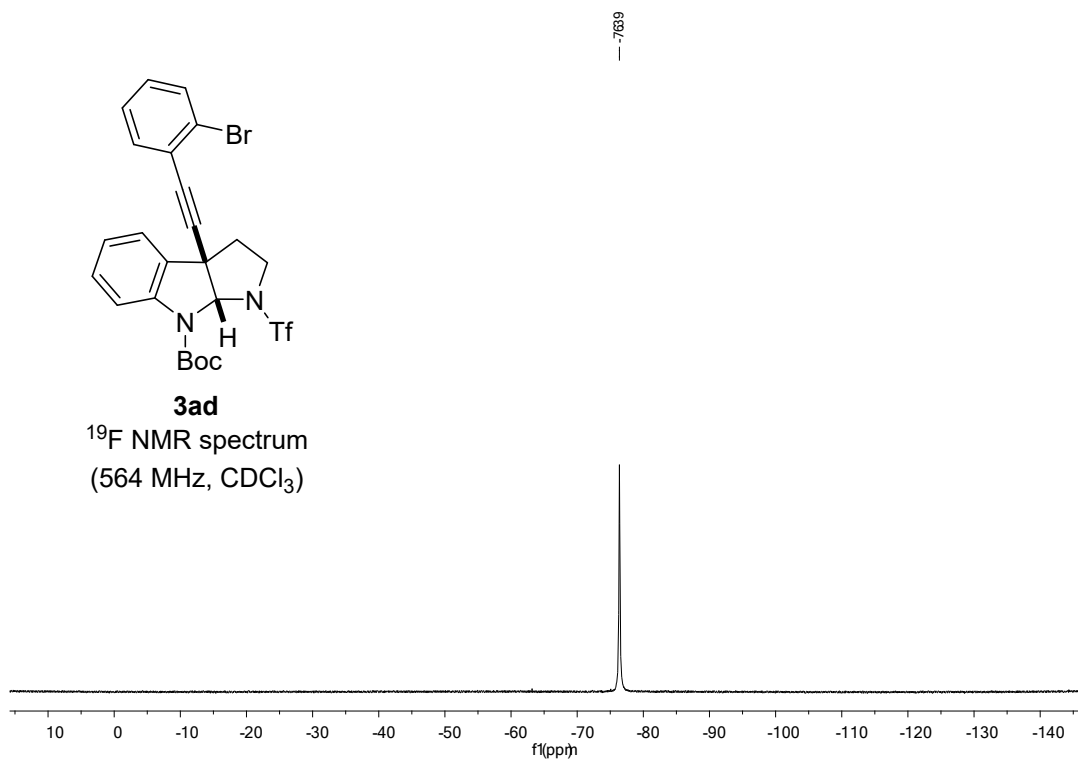

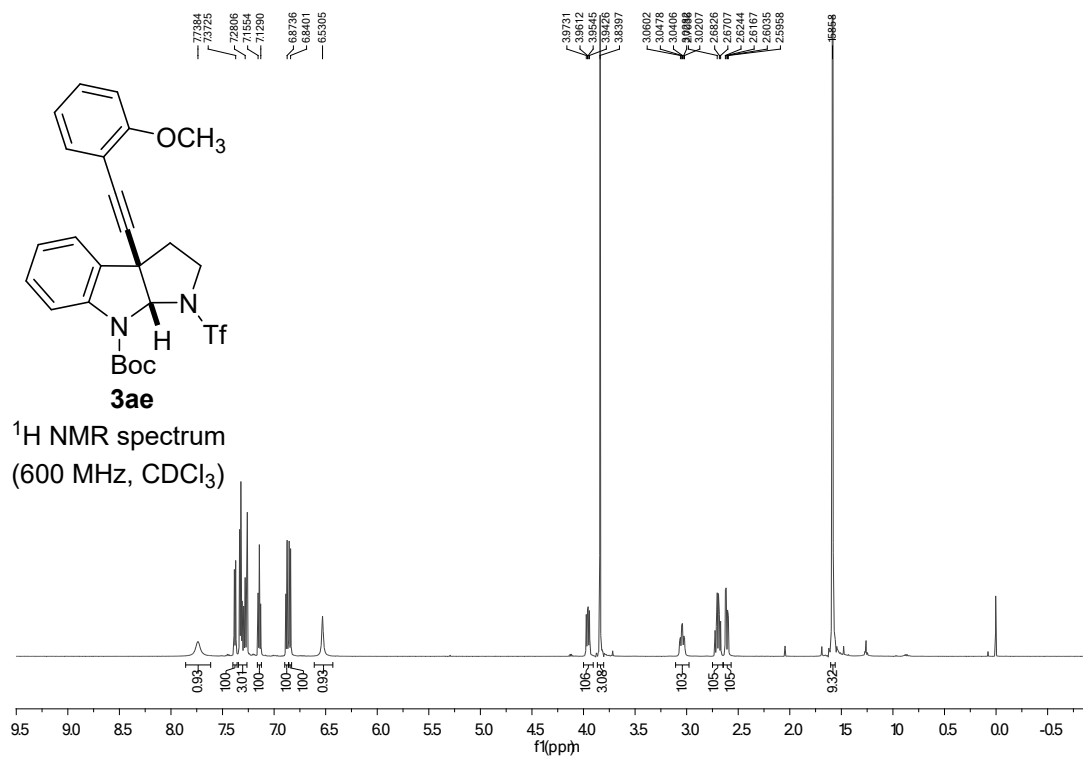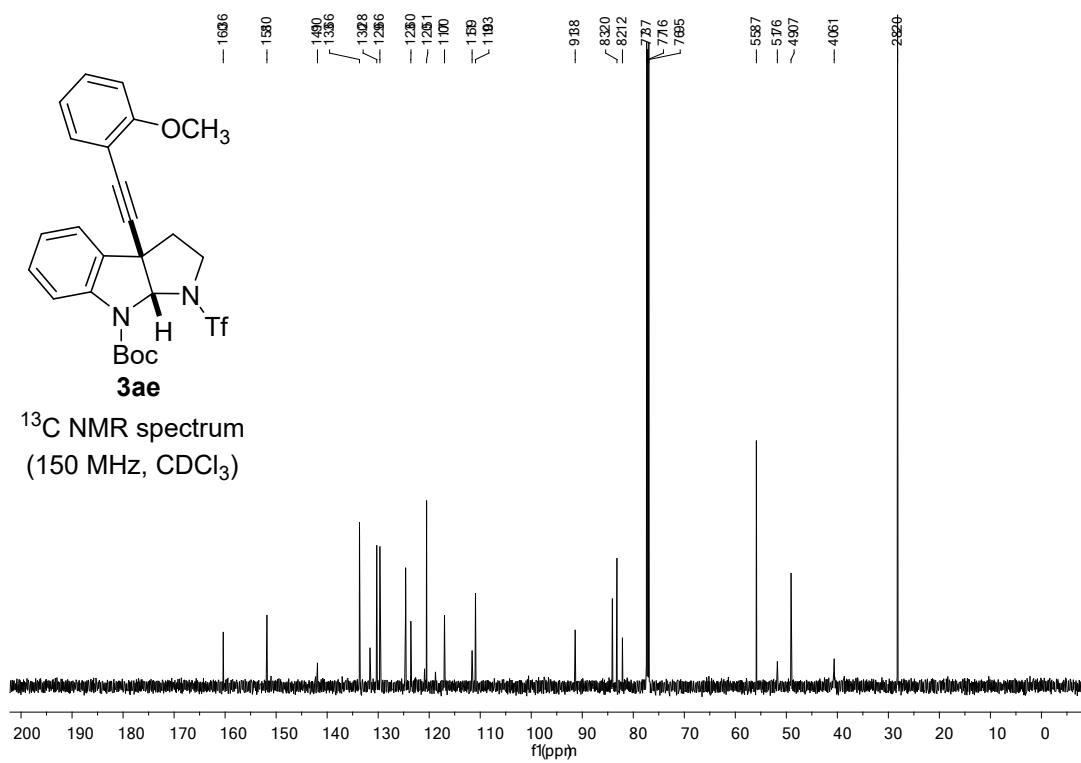

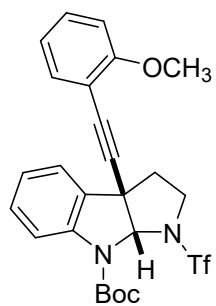

**3ae**

$^{19}\text{F}$  NMR spectrum  
(564 MHz,  $\text{CDCl}_3$ )

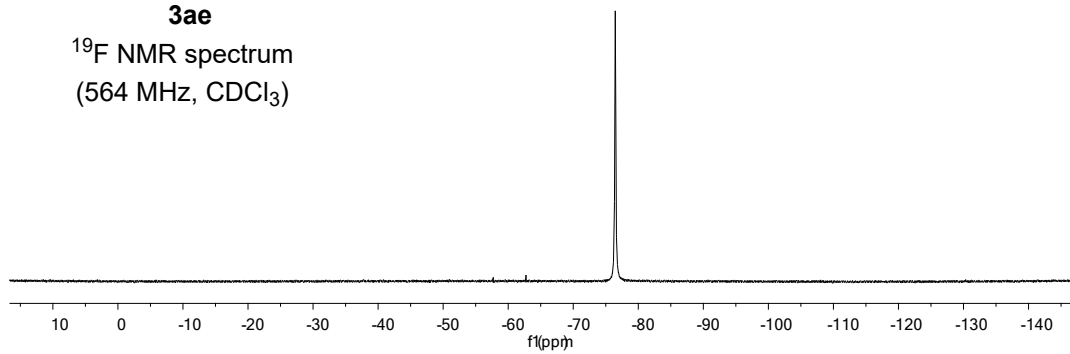



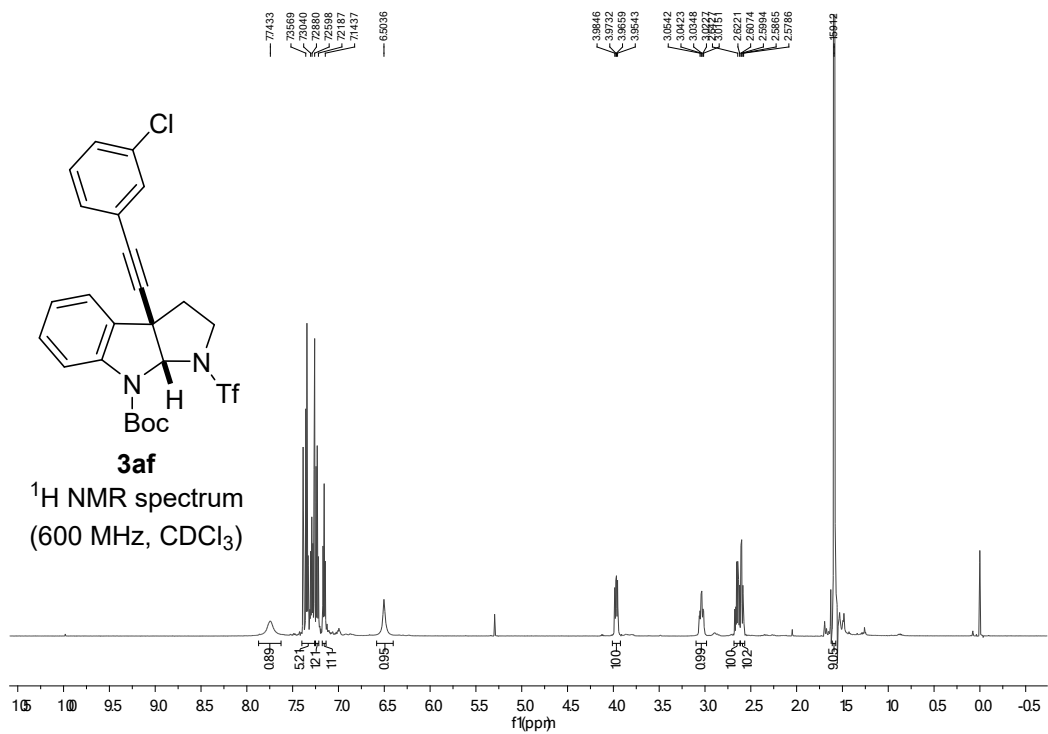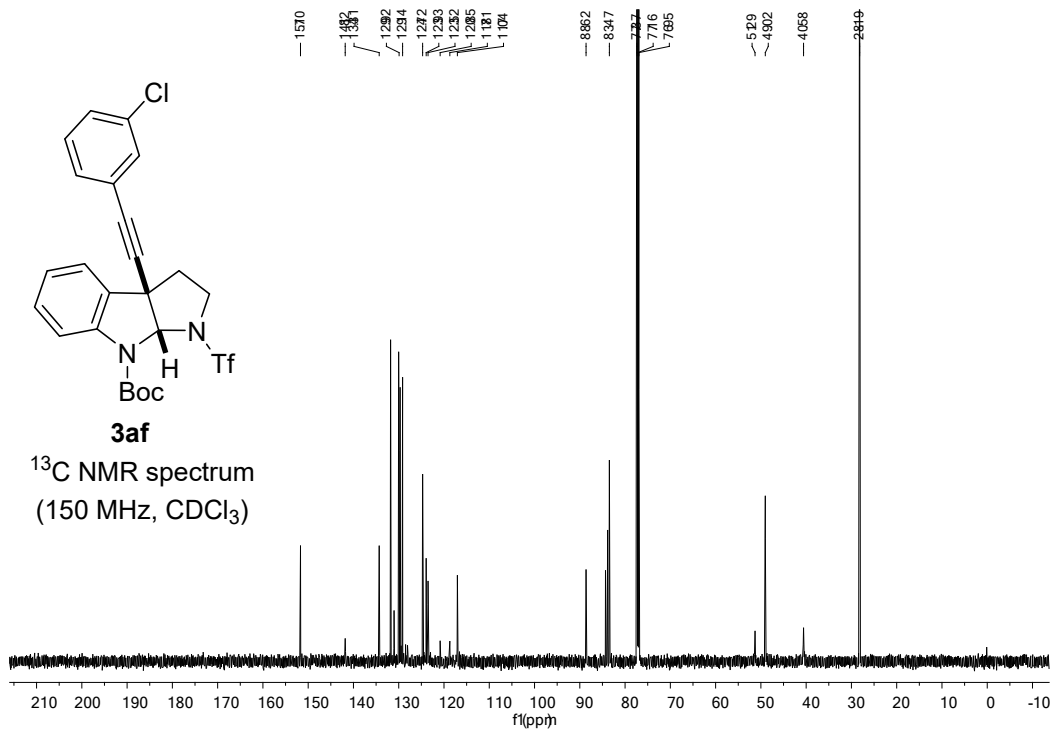

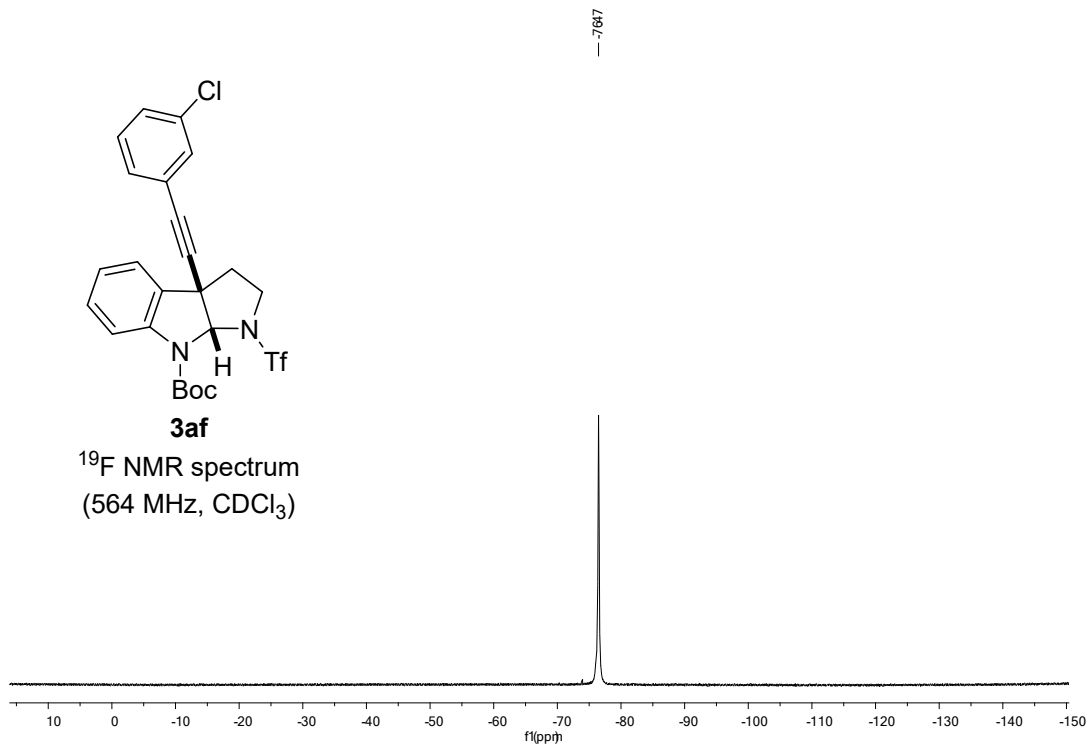

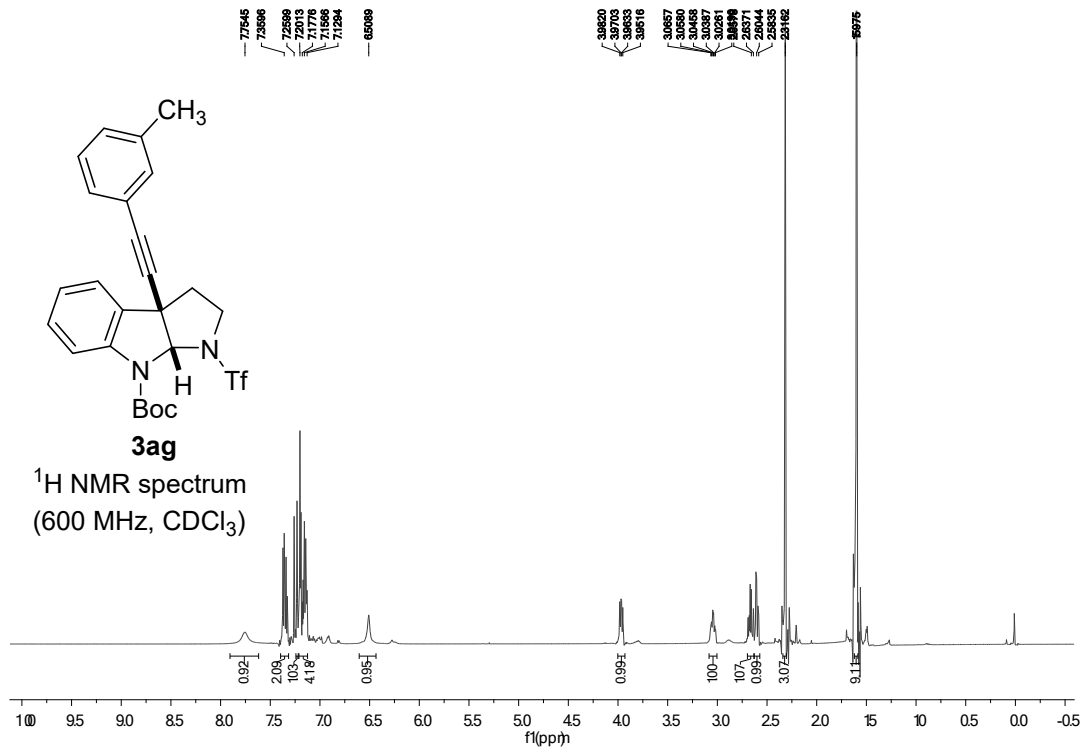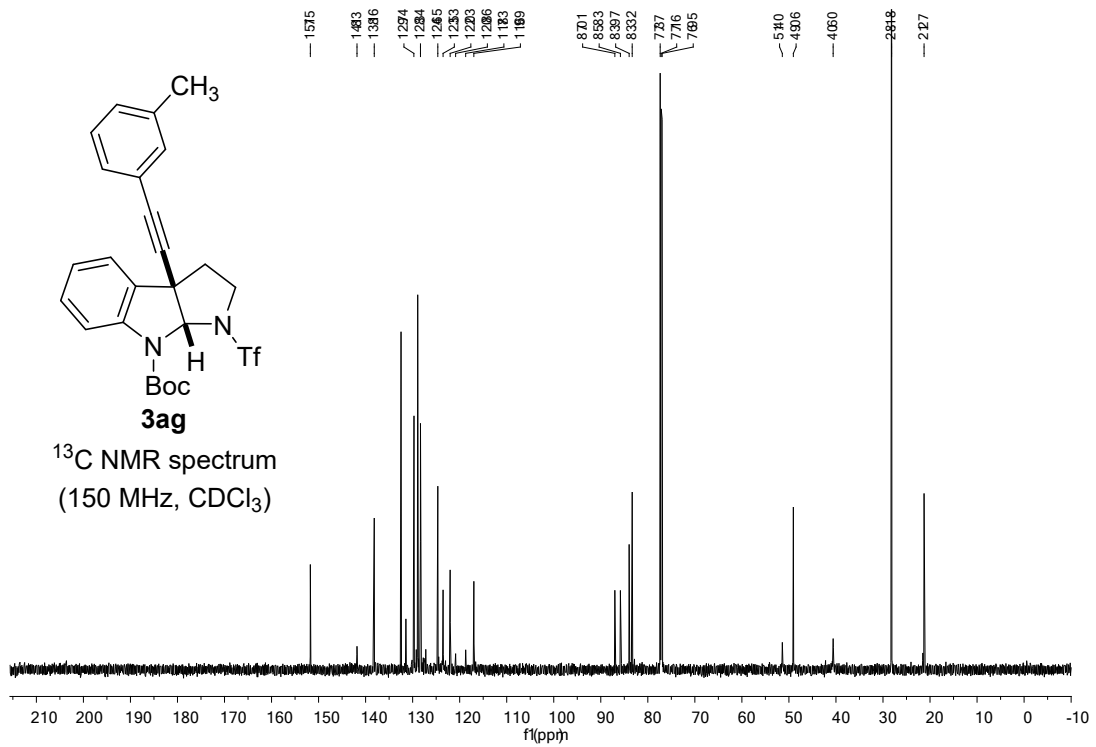

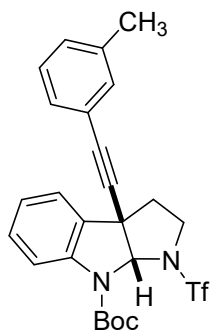

**3ag**

<sup>19</sup>F NMR spectrum  
(564 MHz, CDCl<sub>3</sub>)

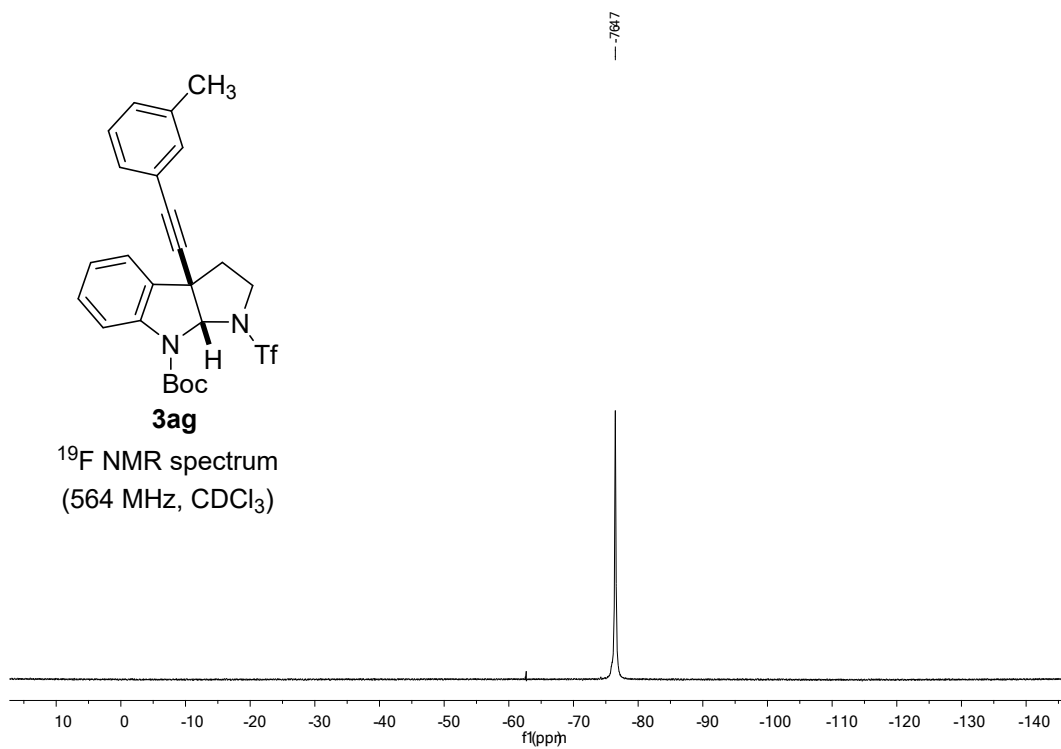

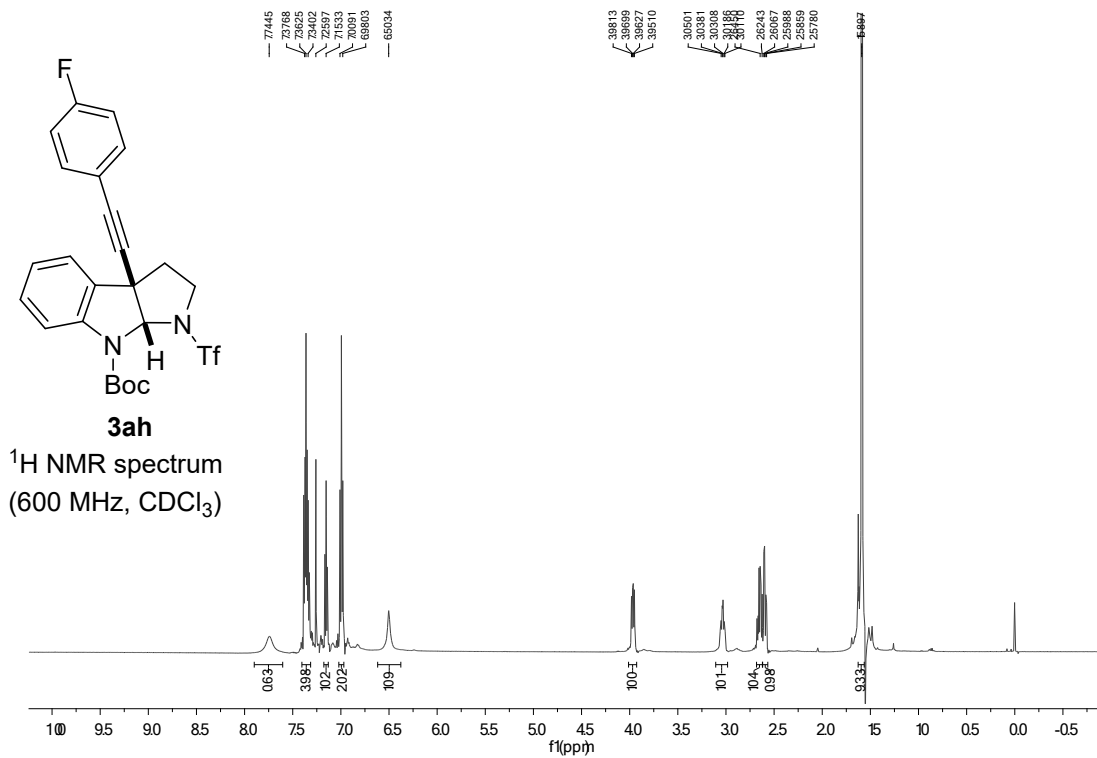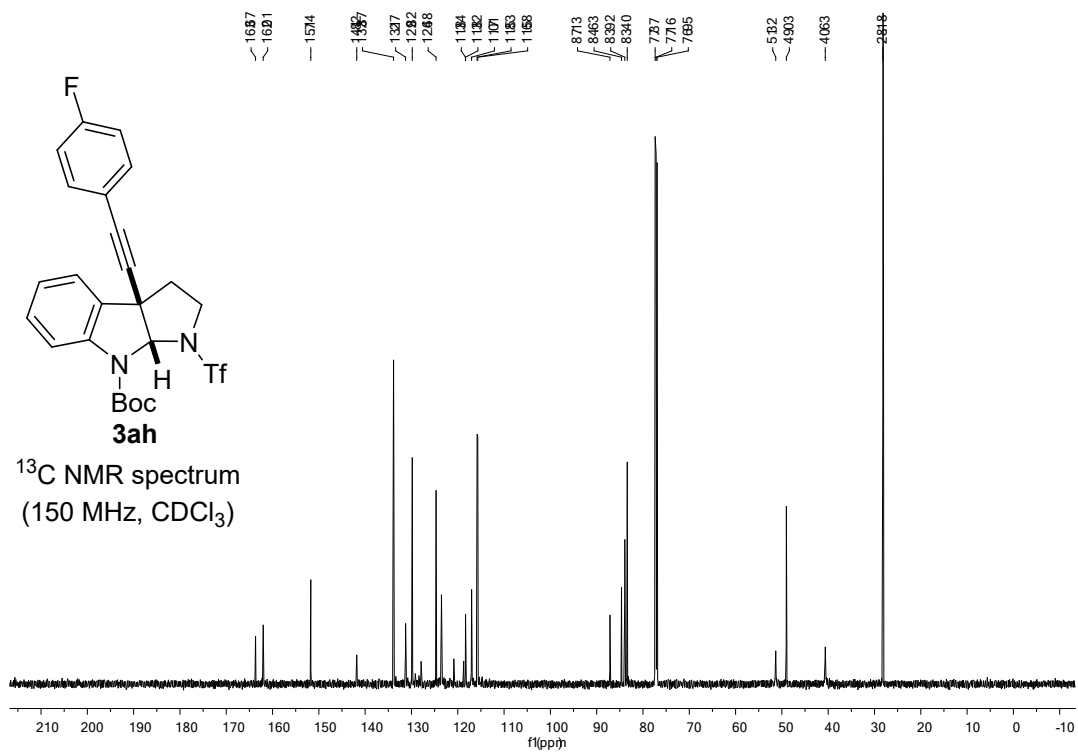

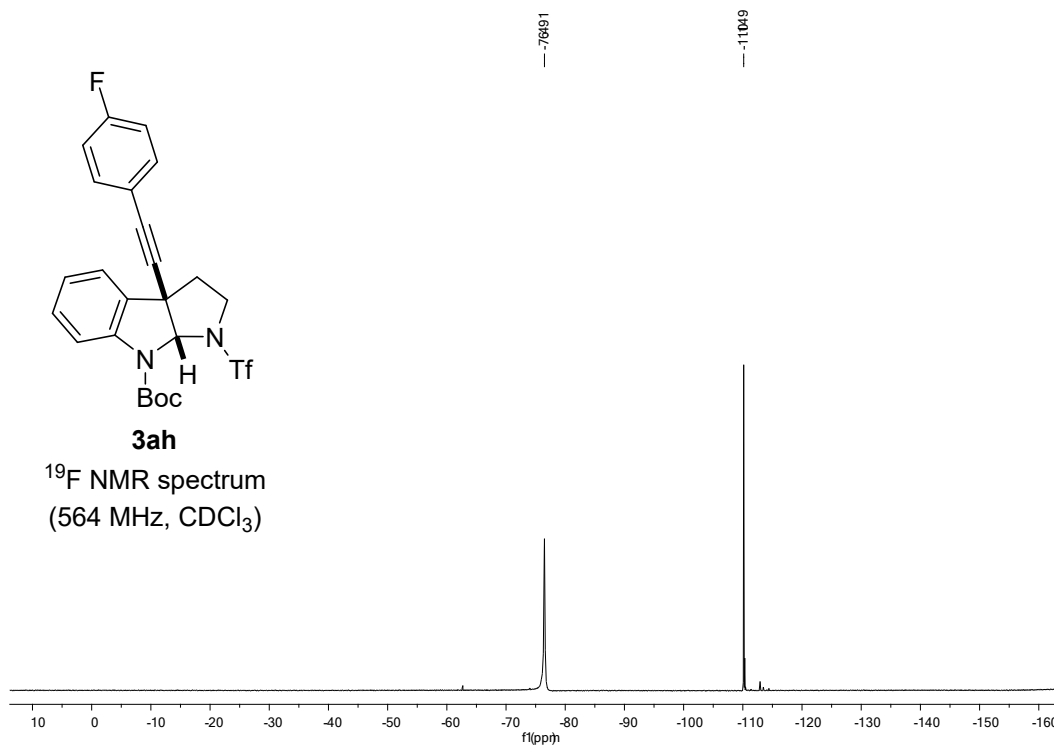

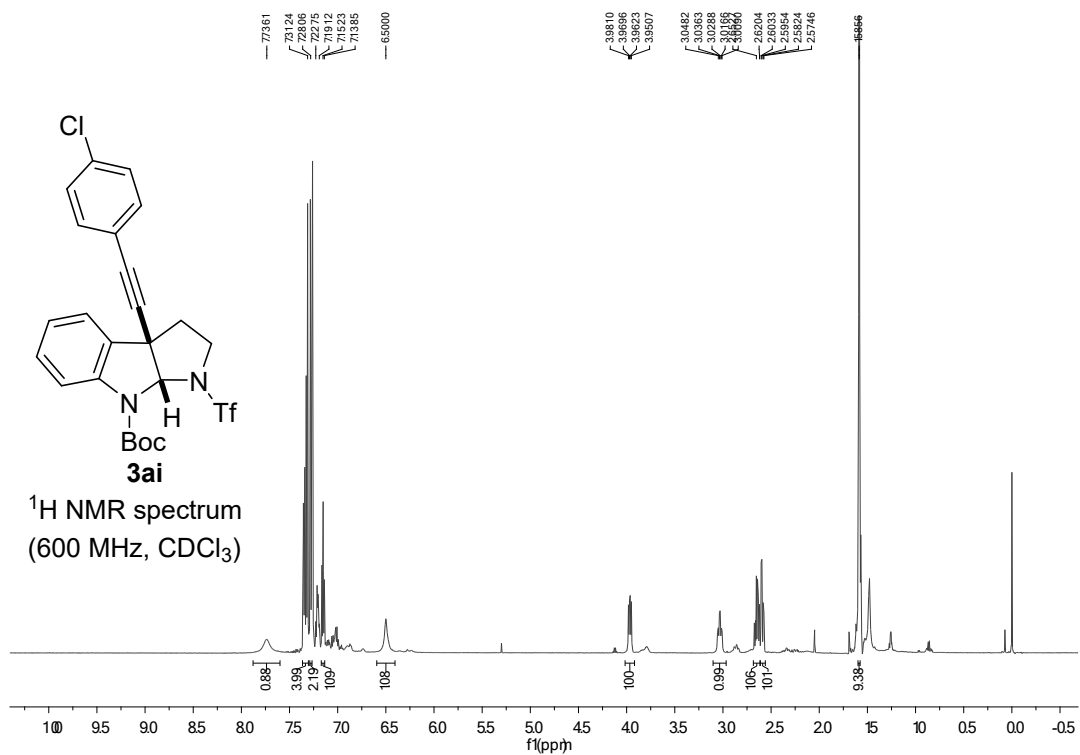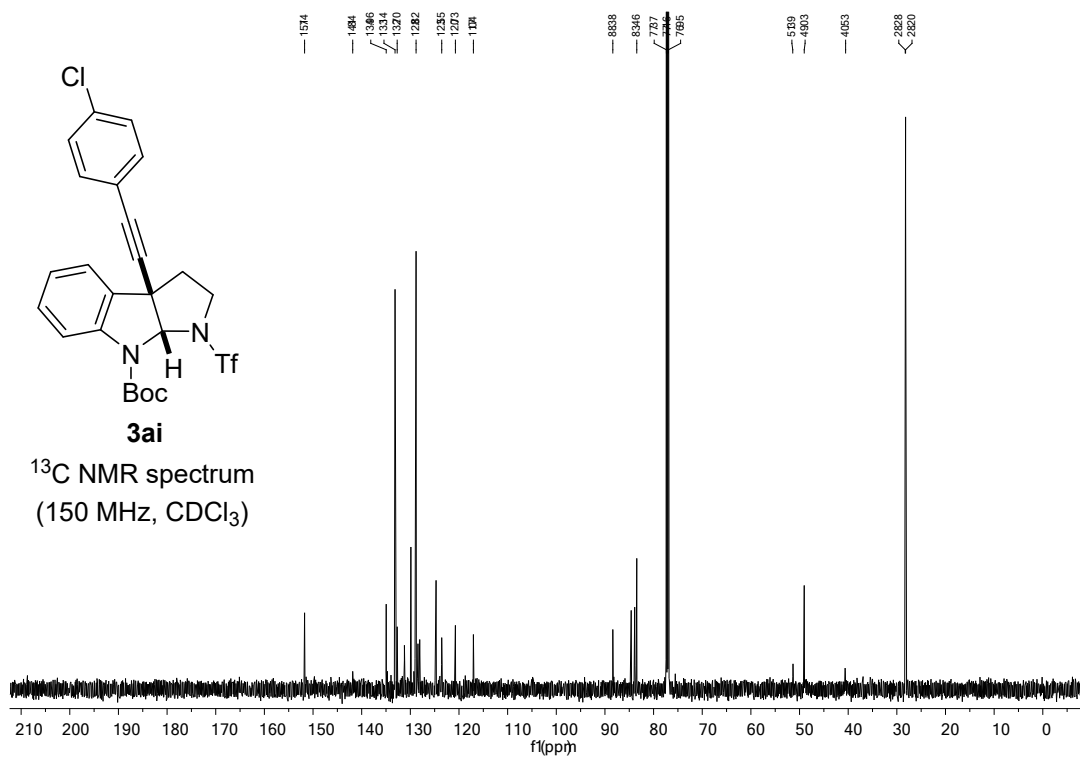

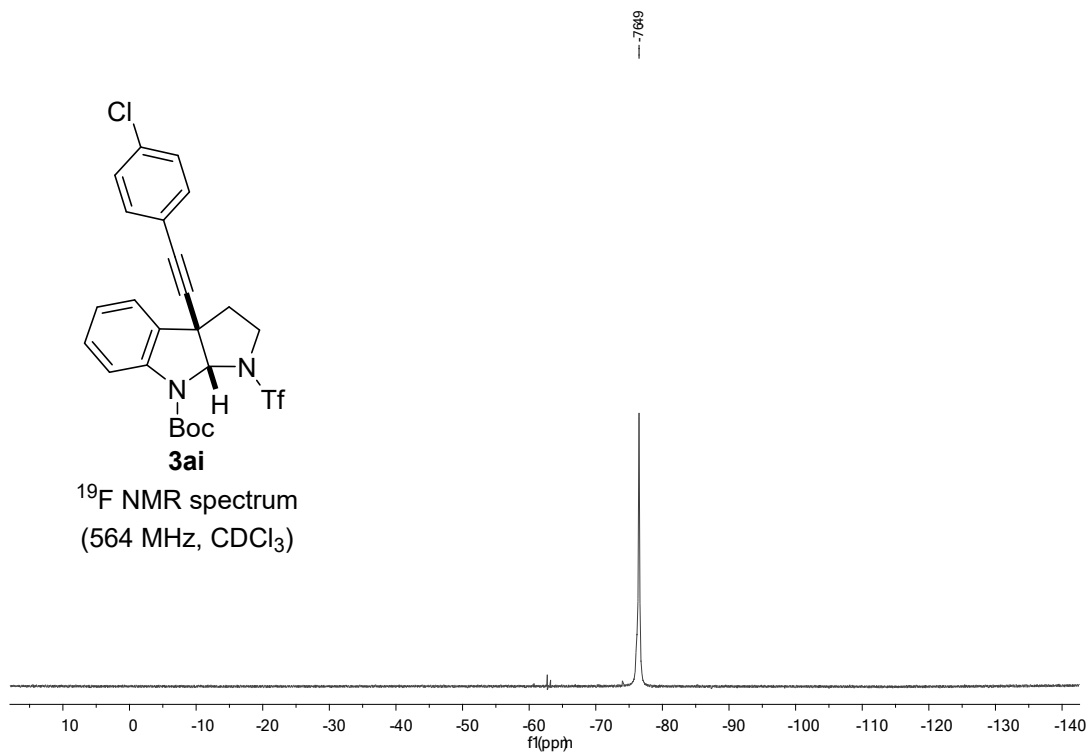



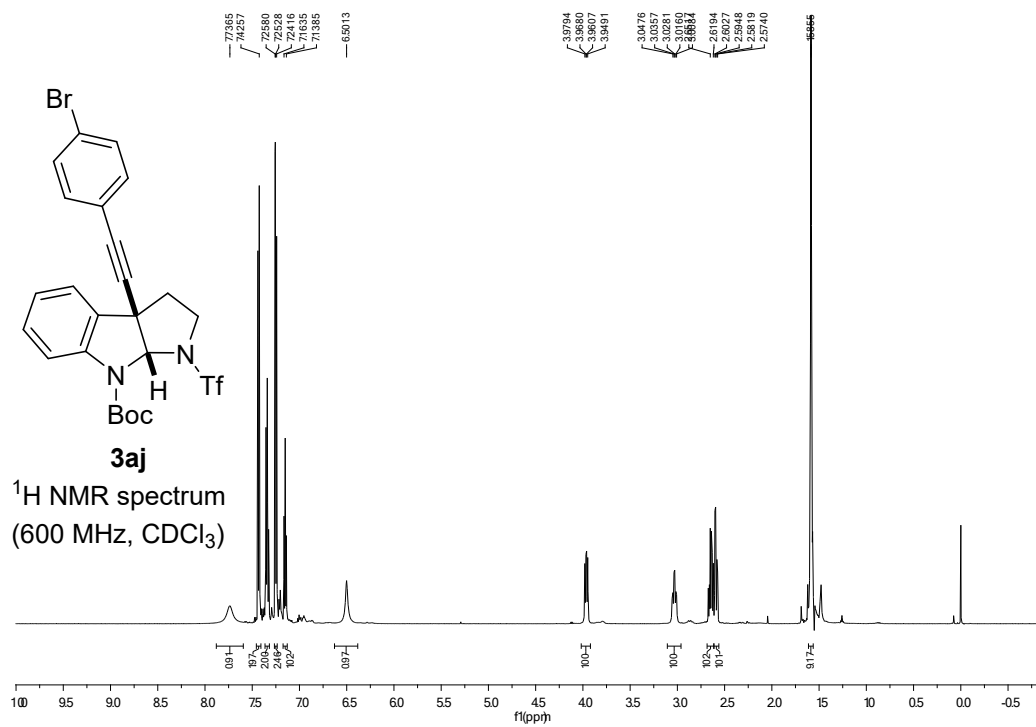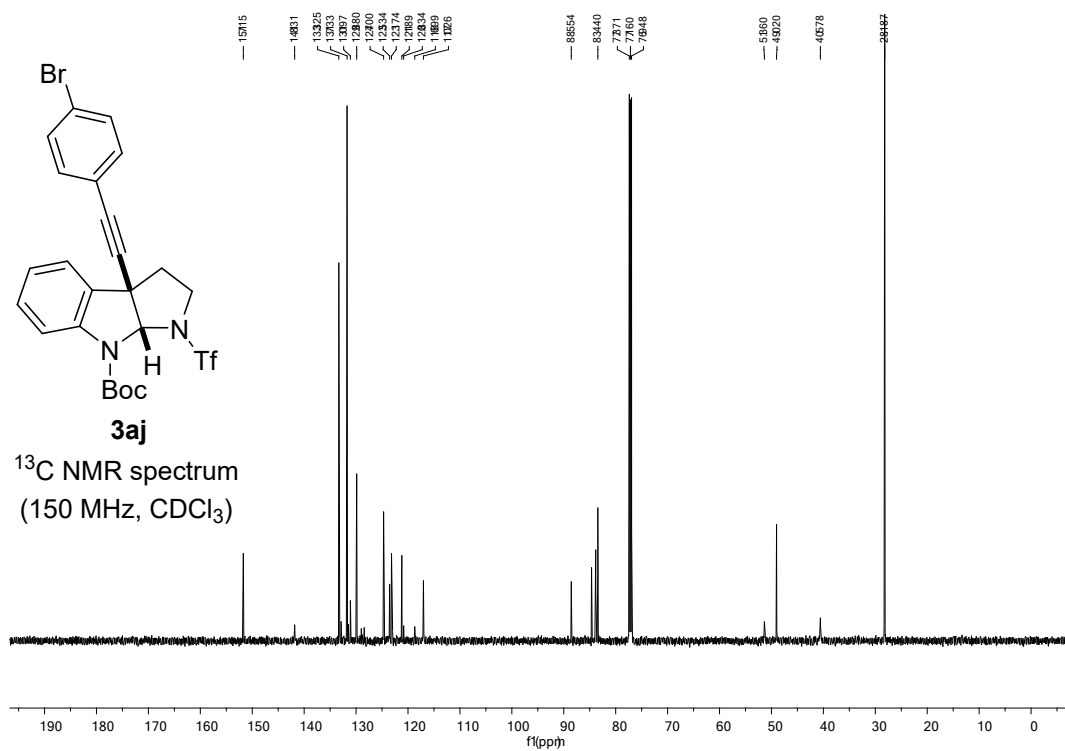

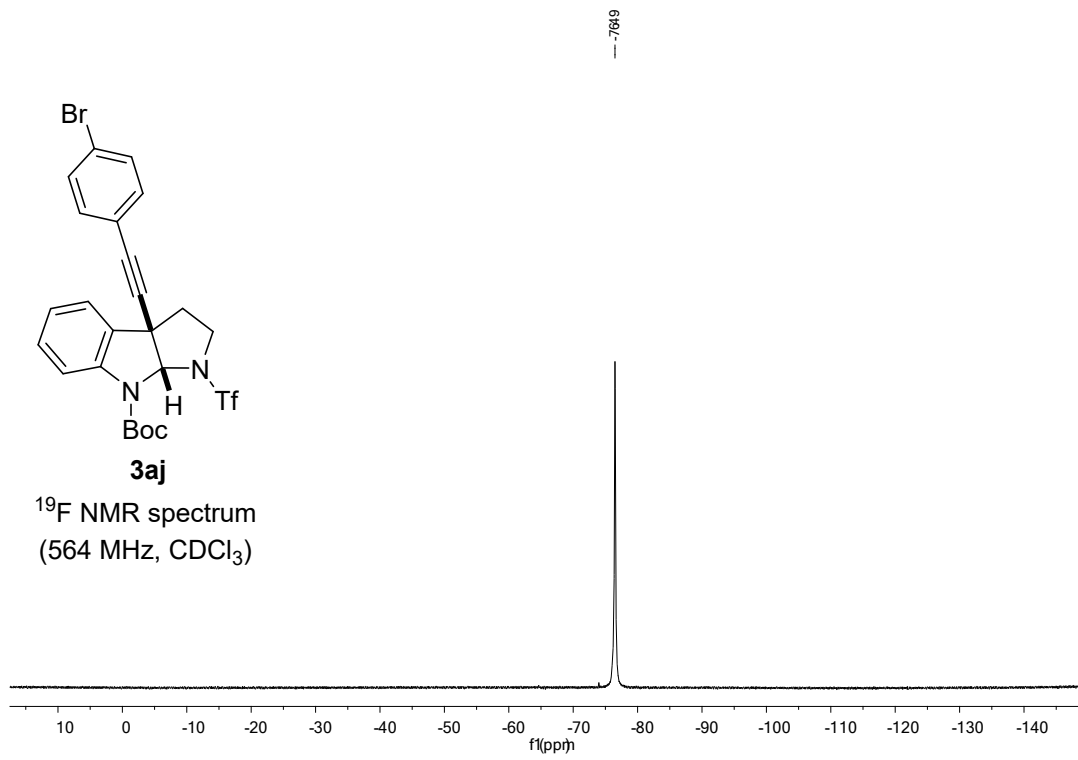

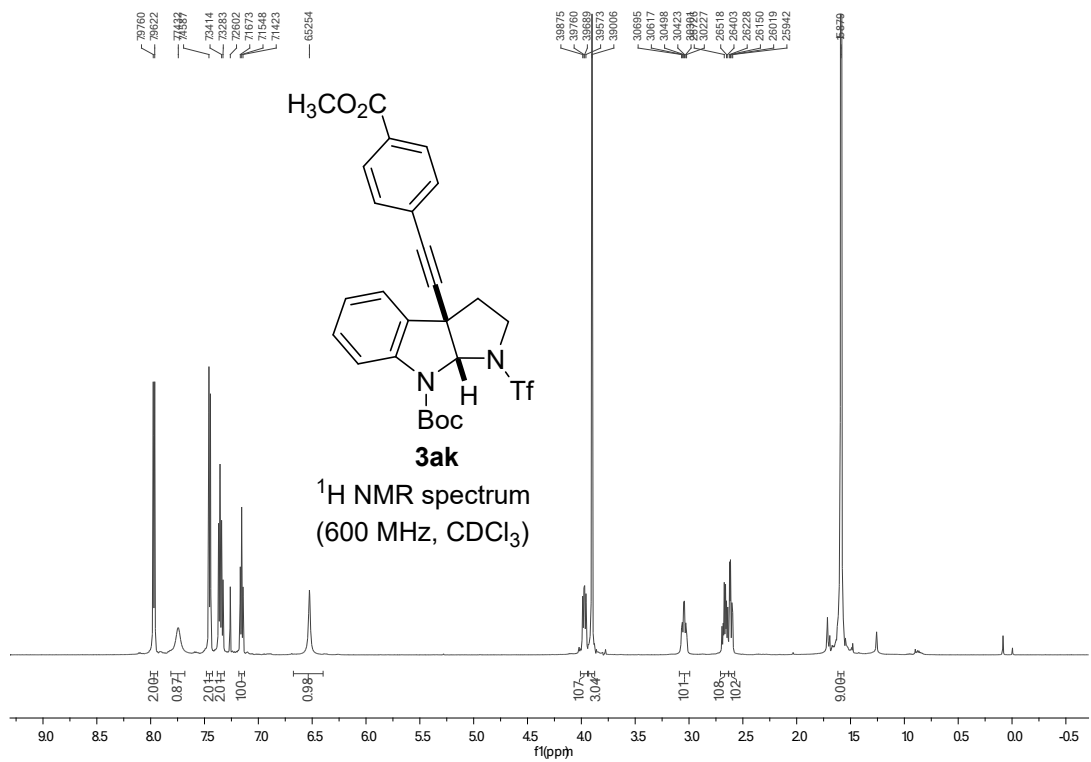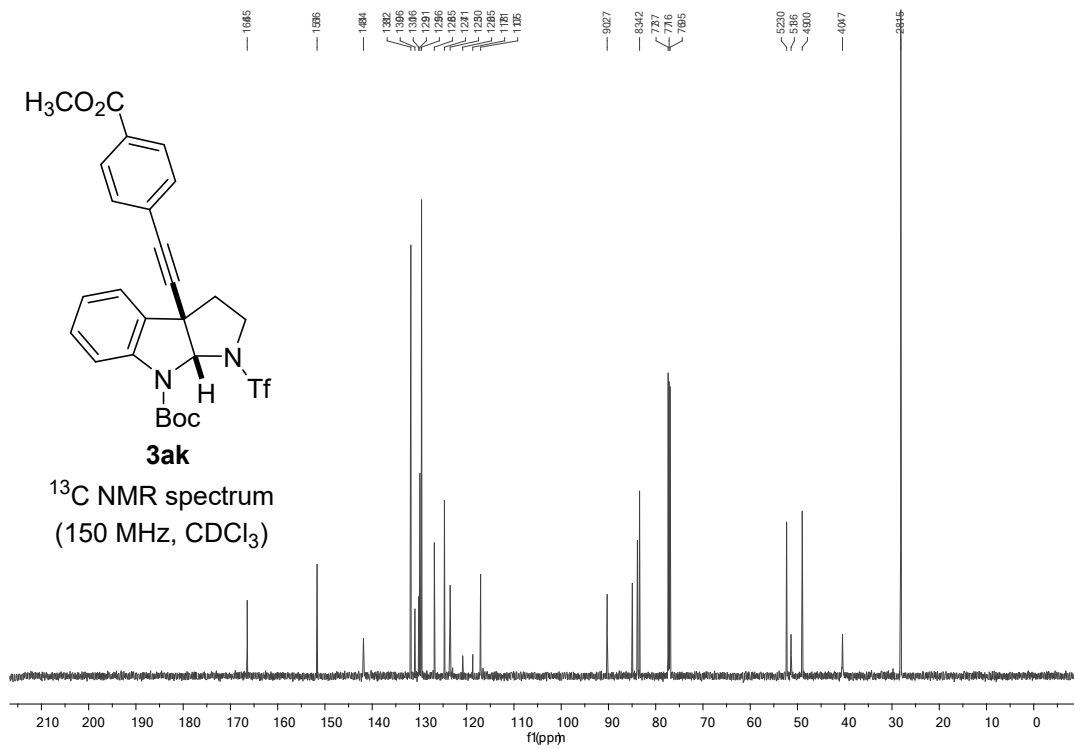

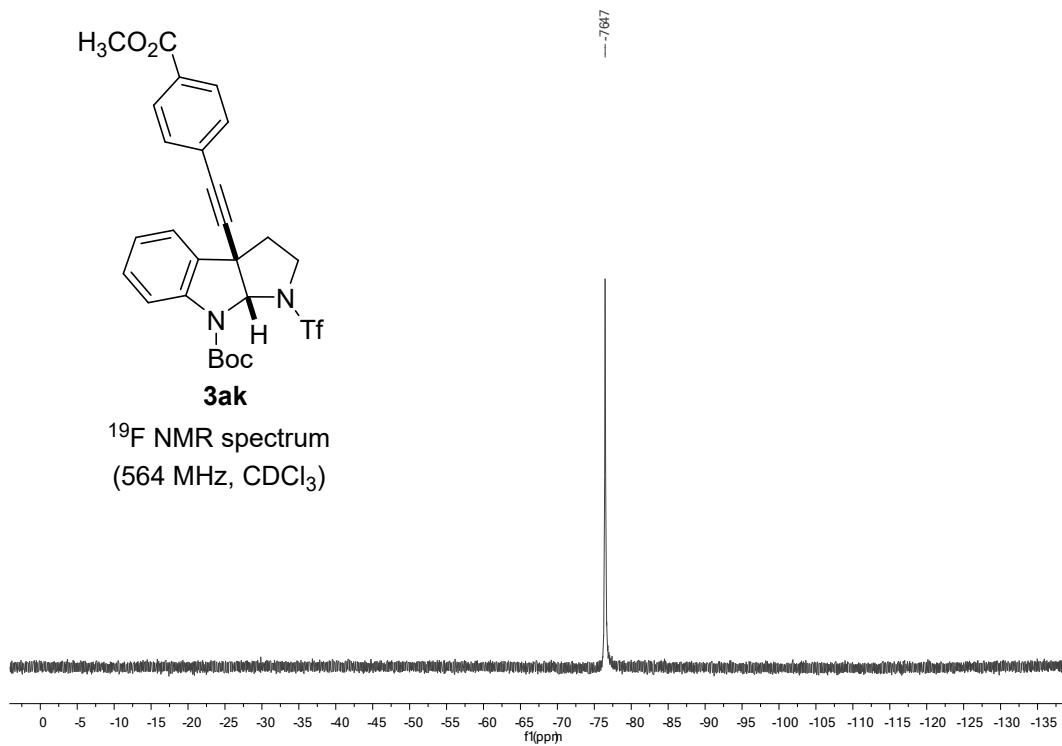

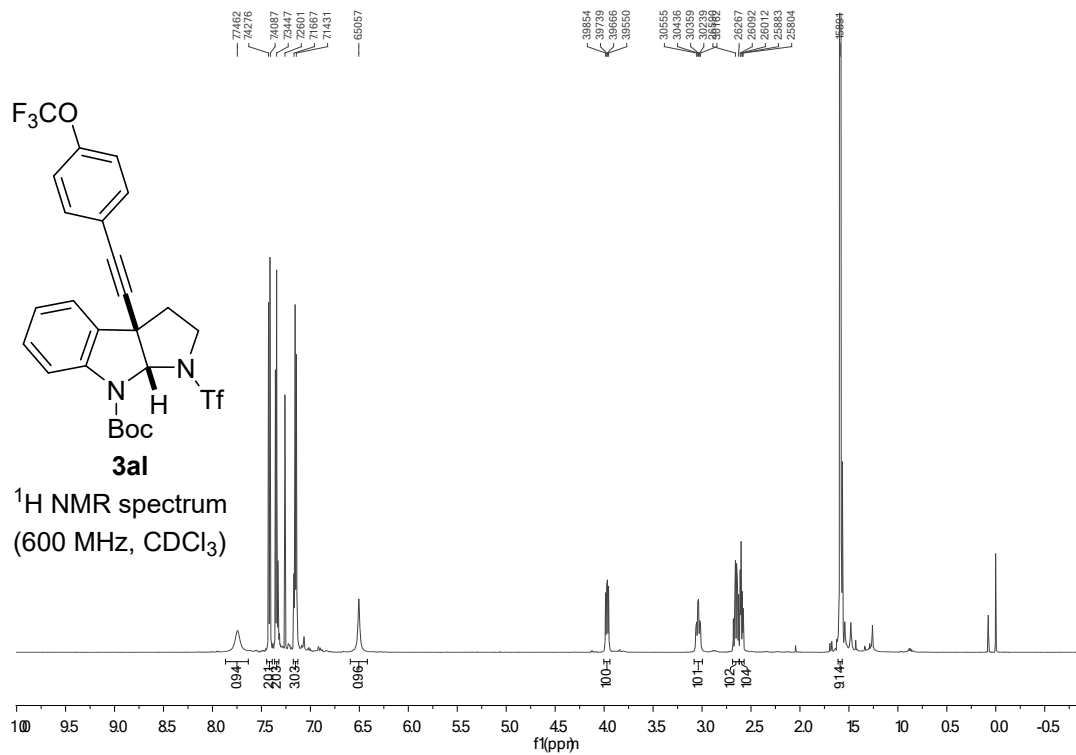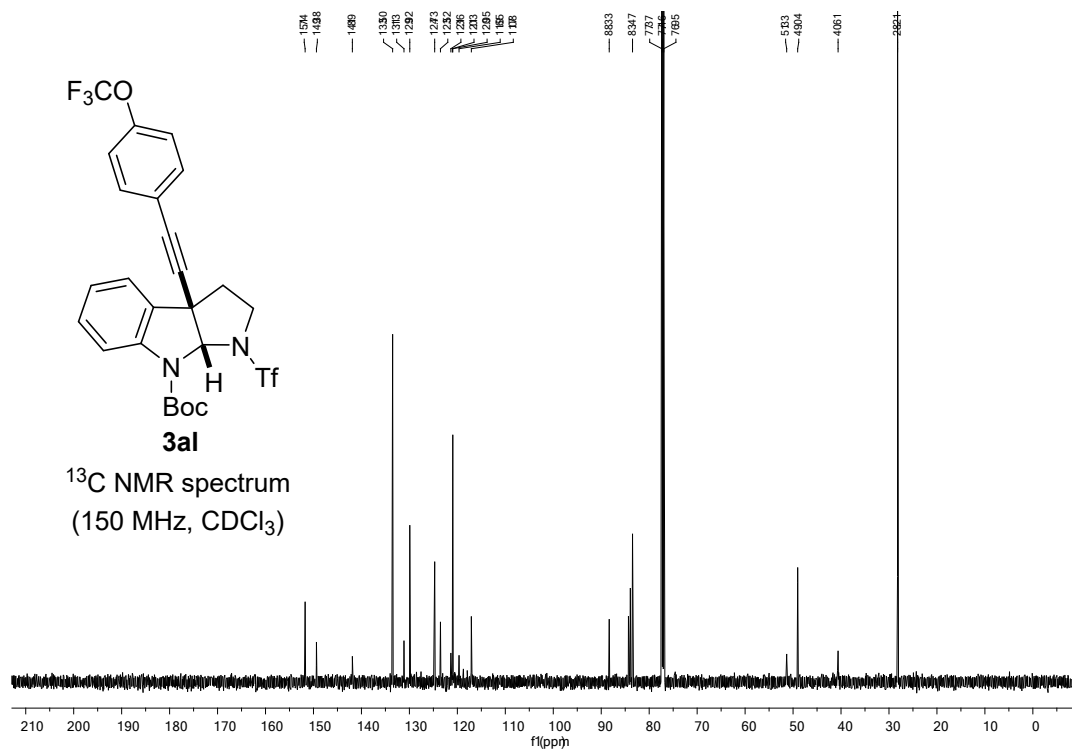



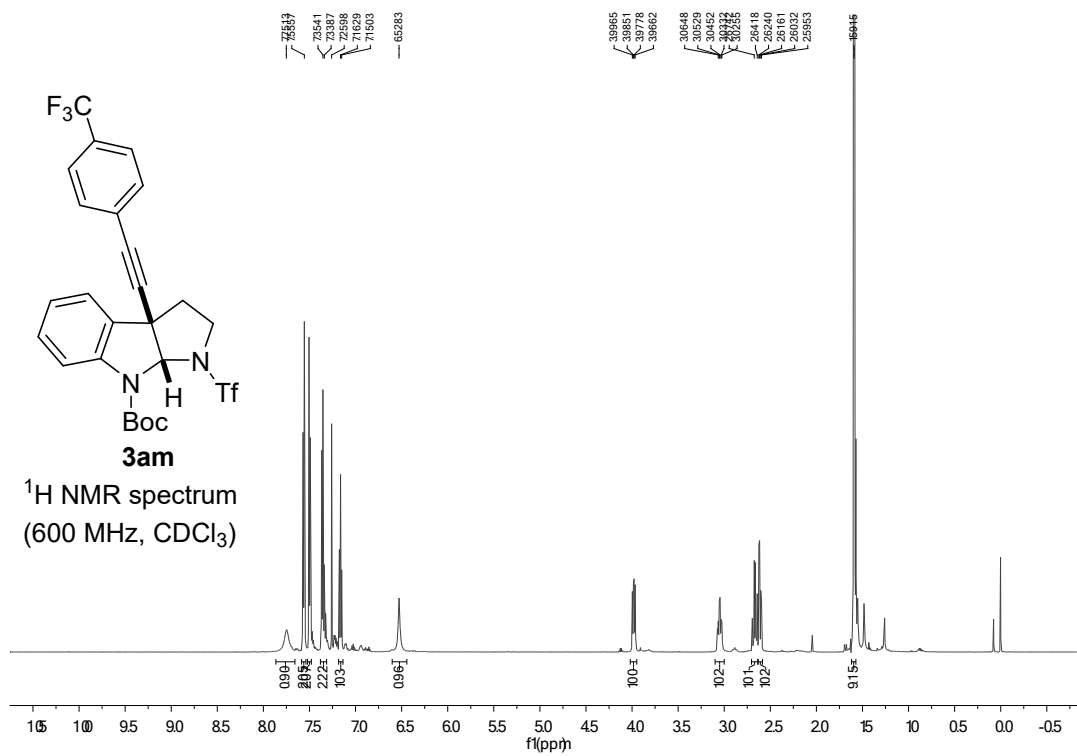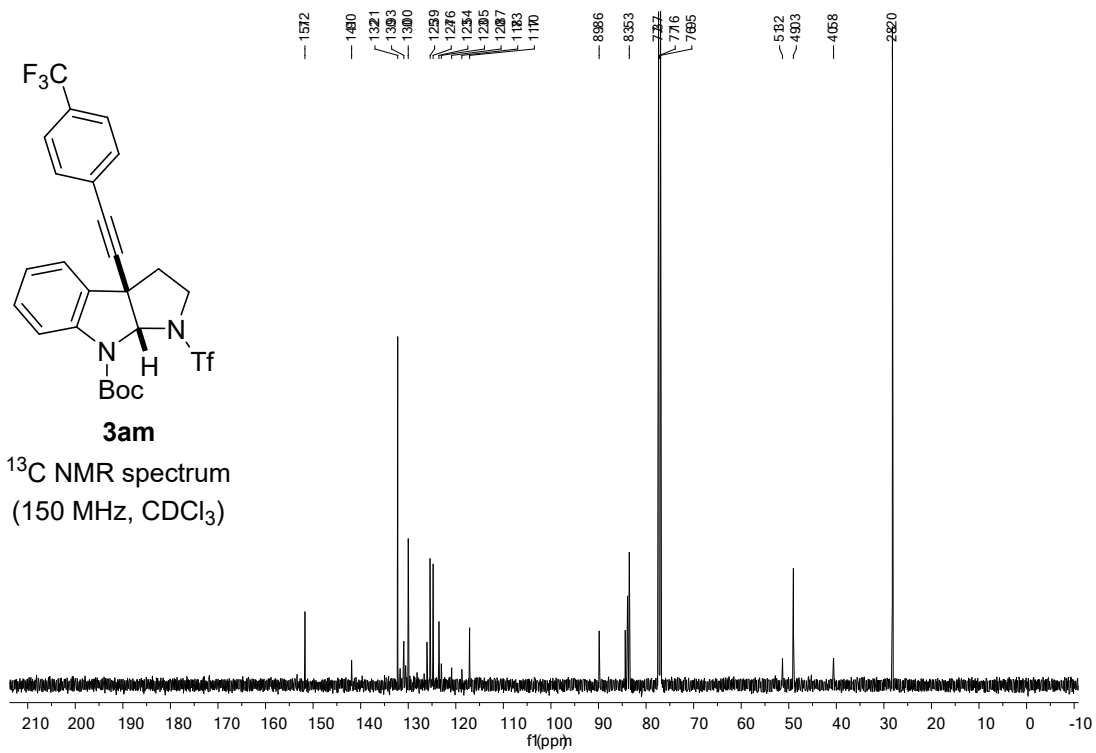

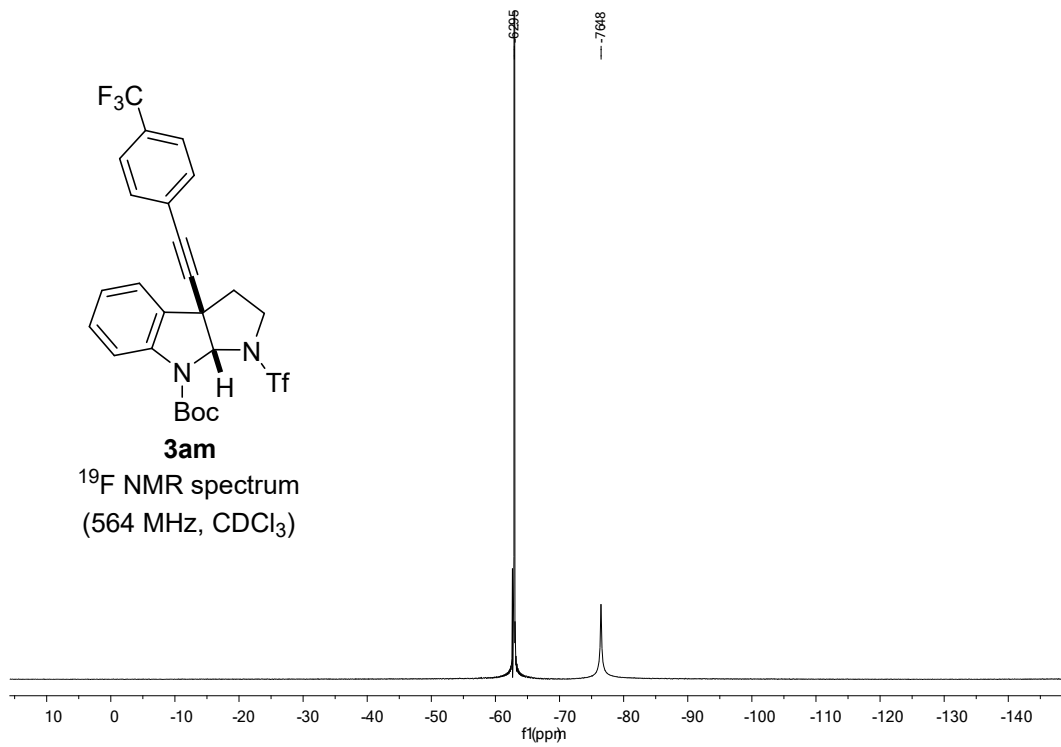



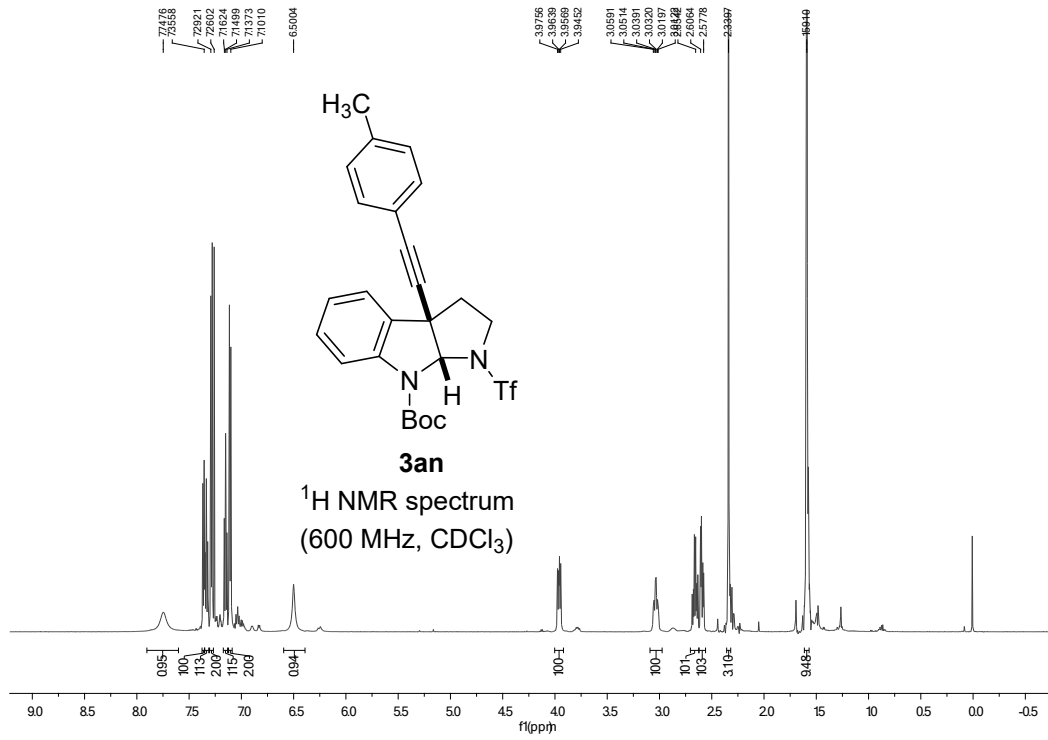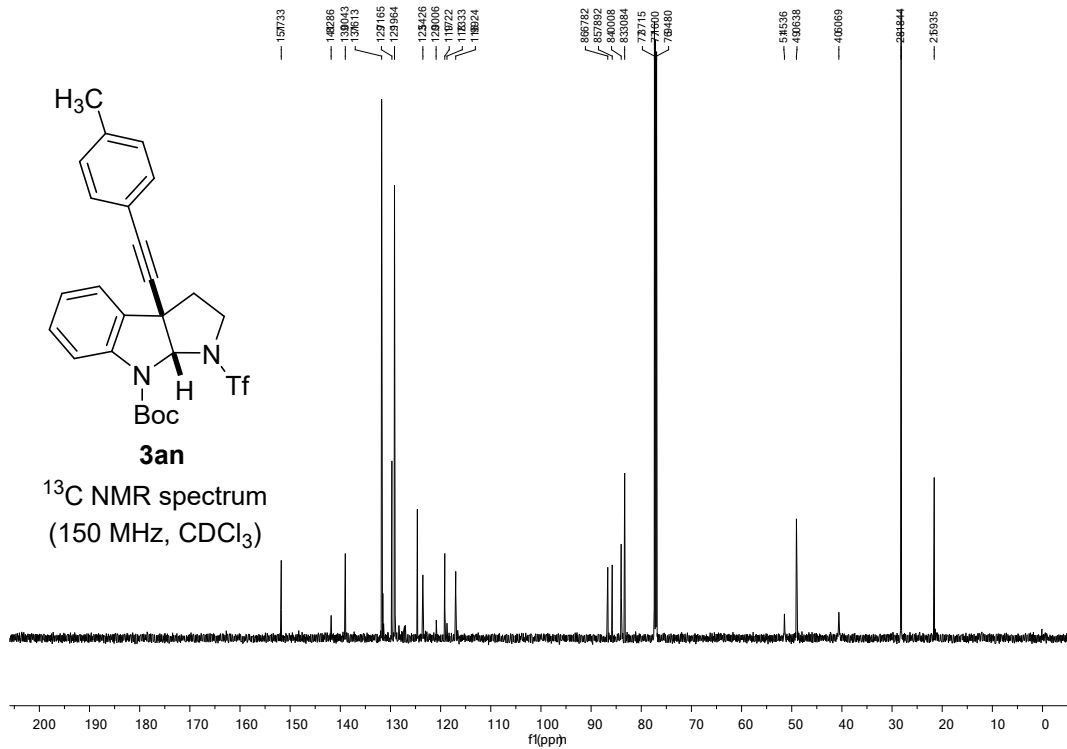

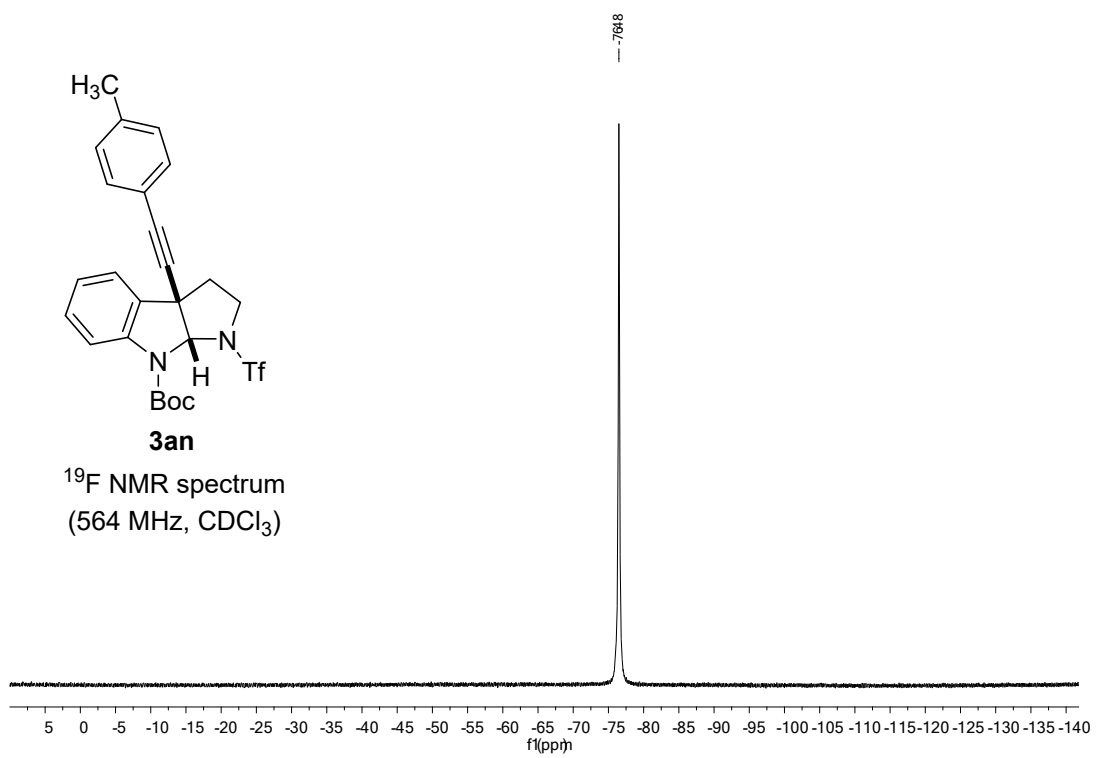

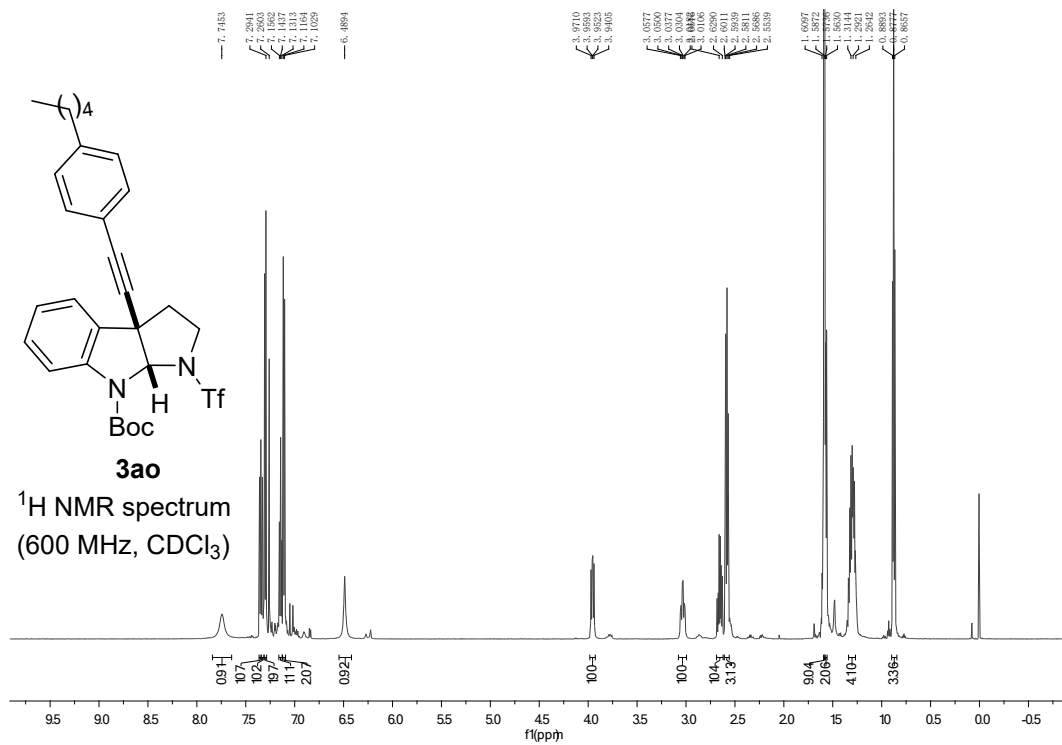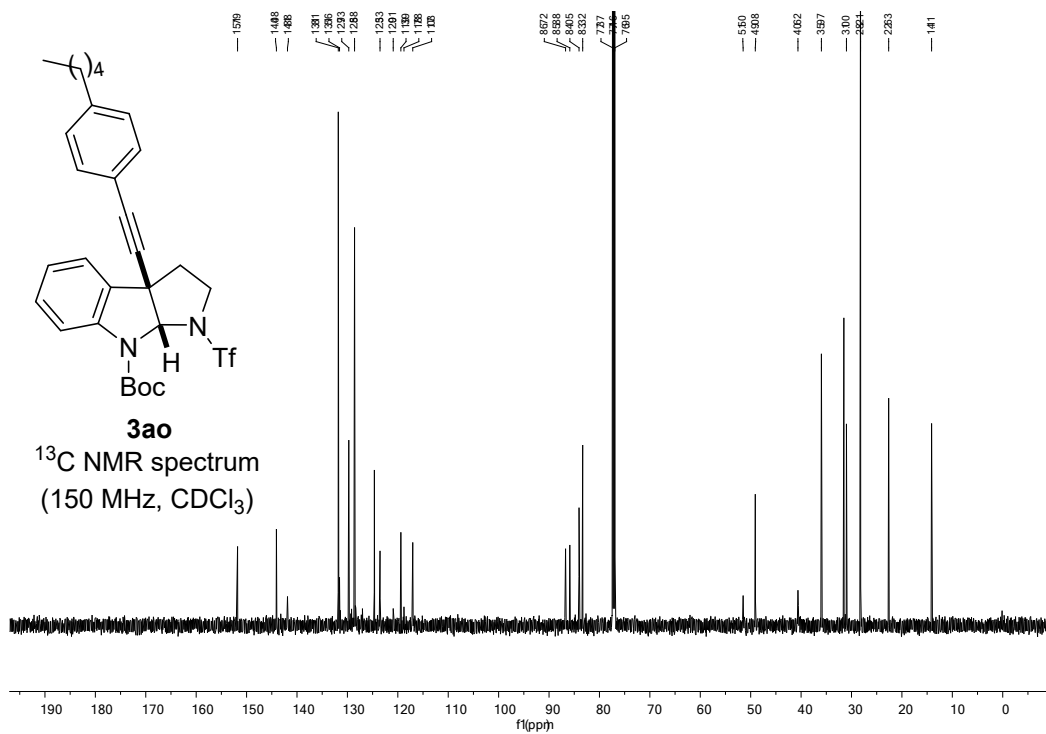

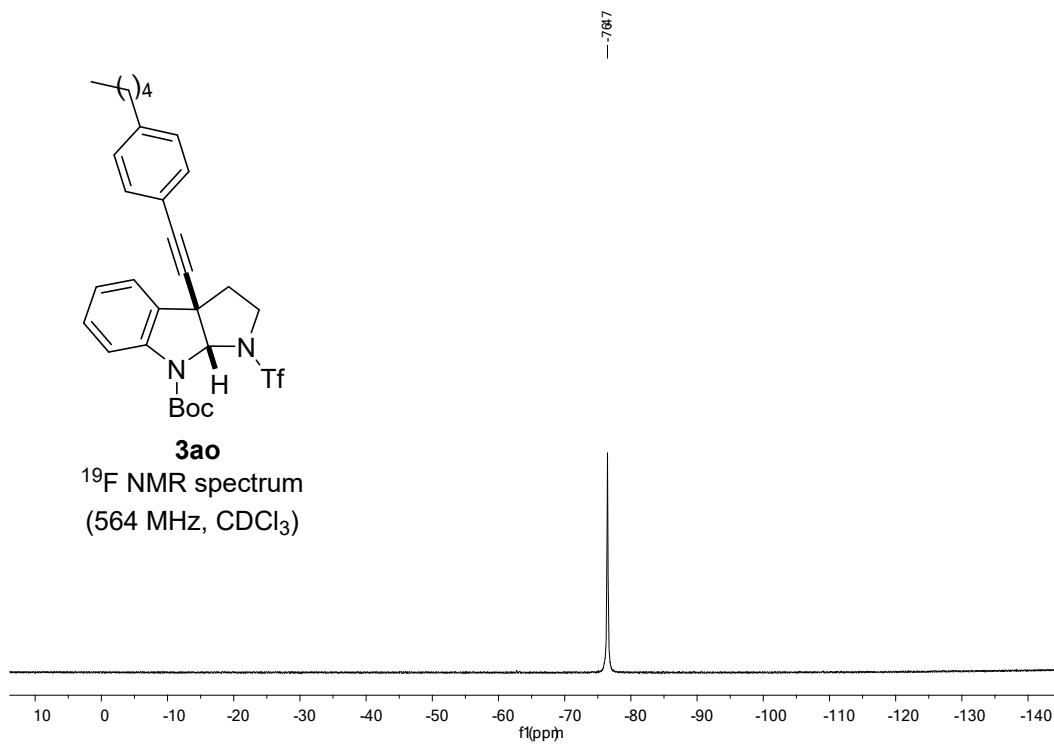

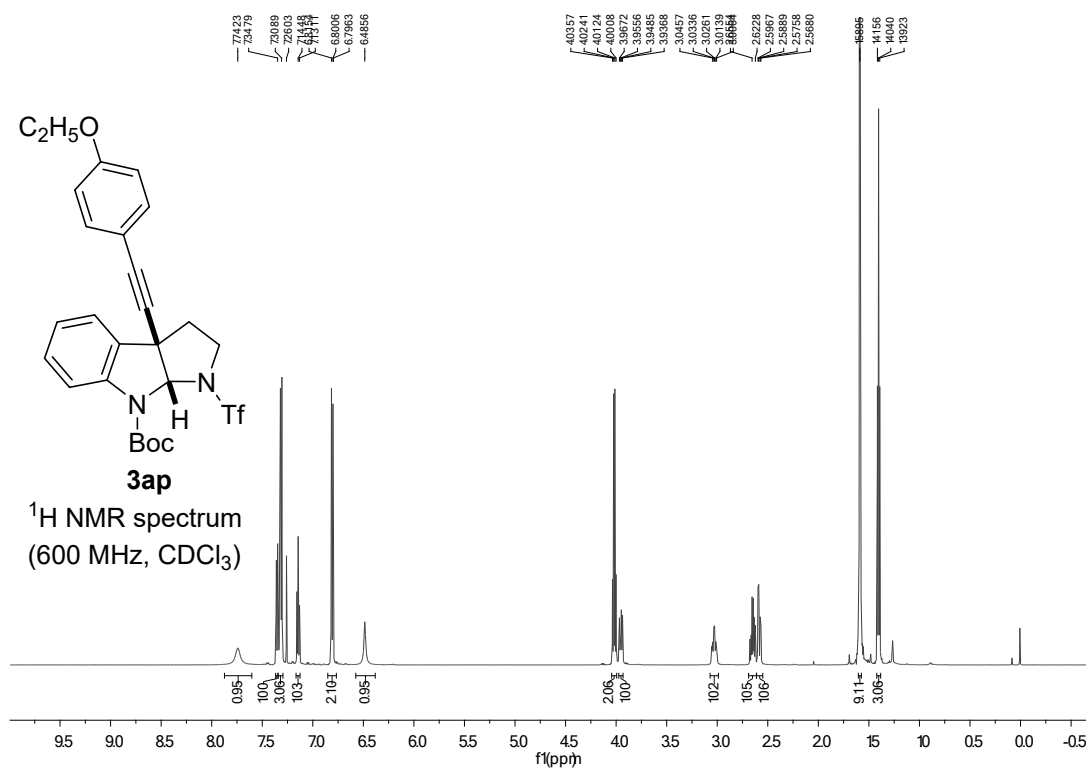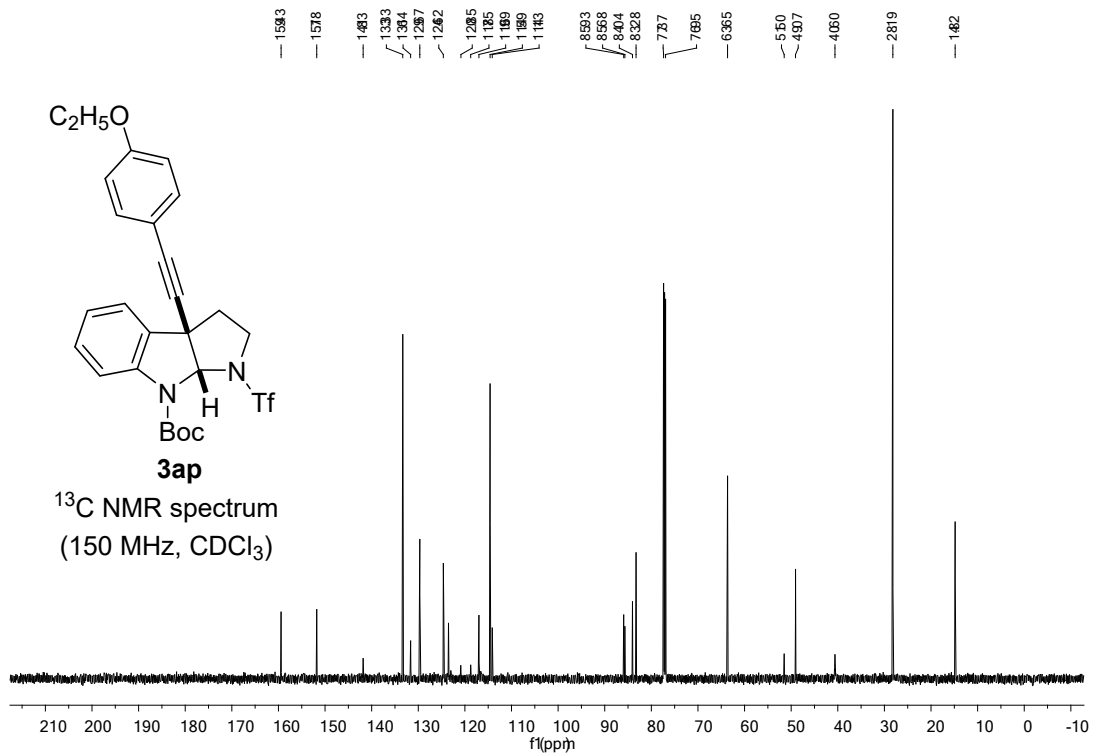

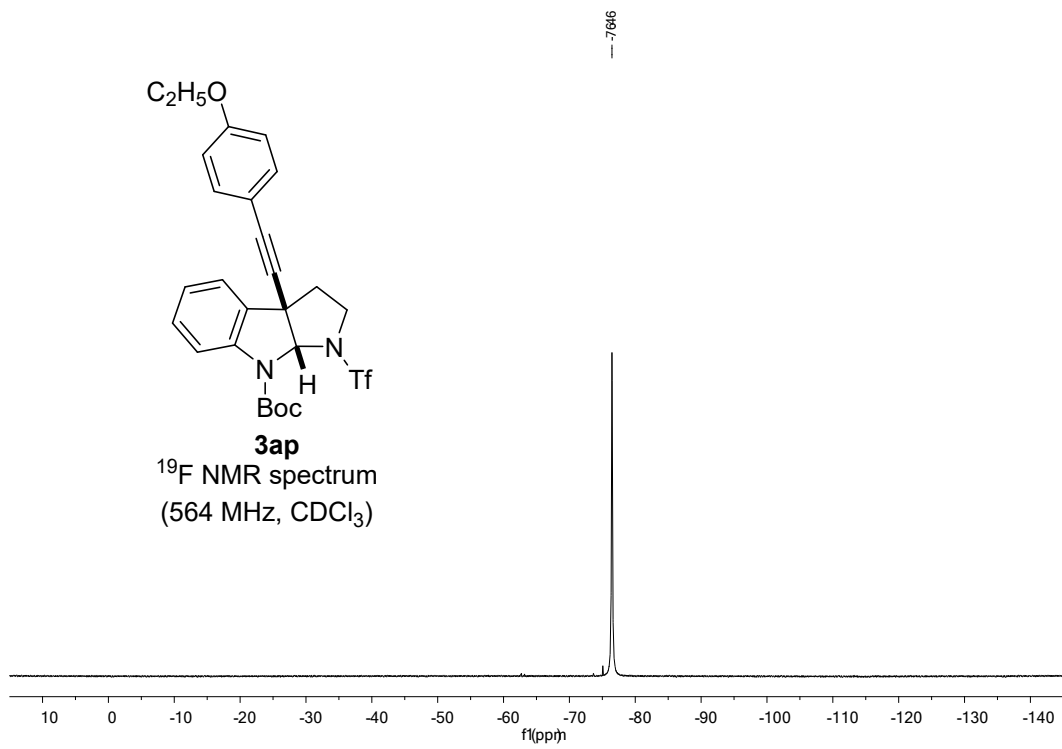

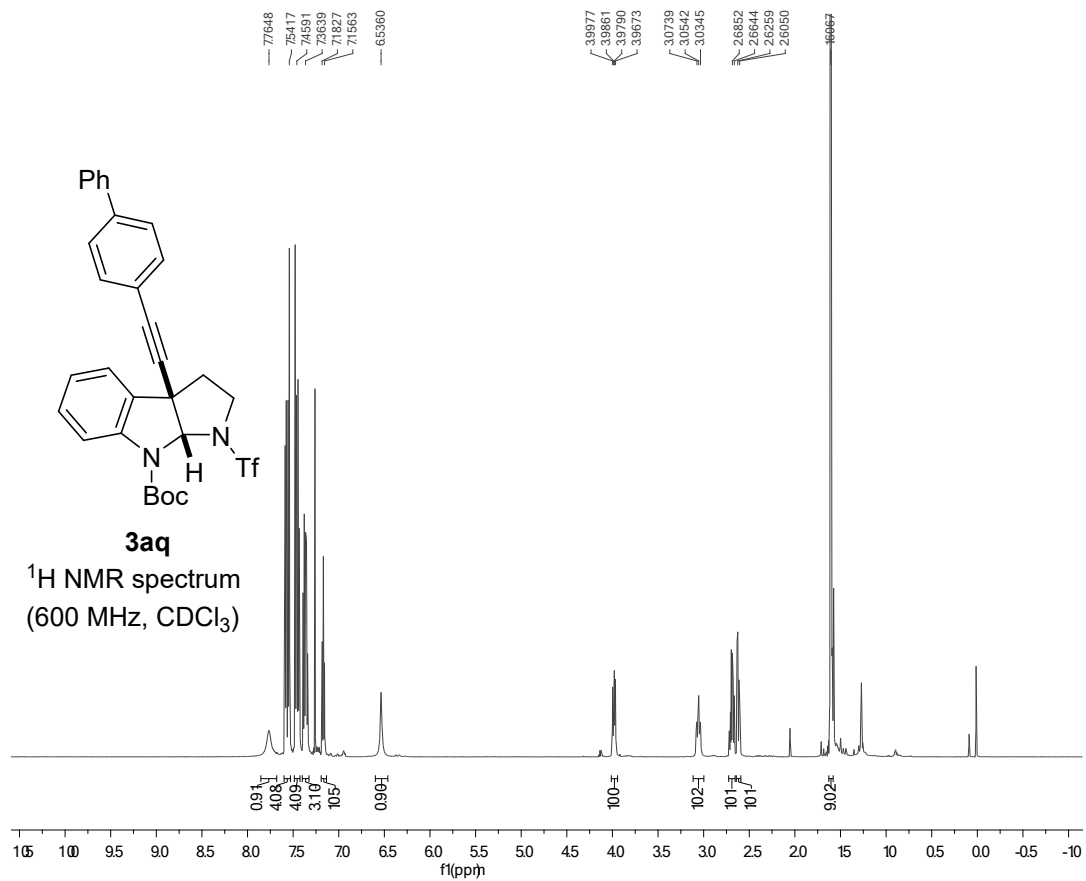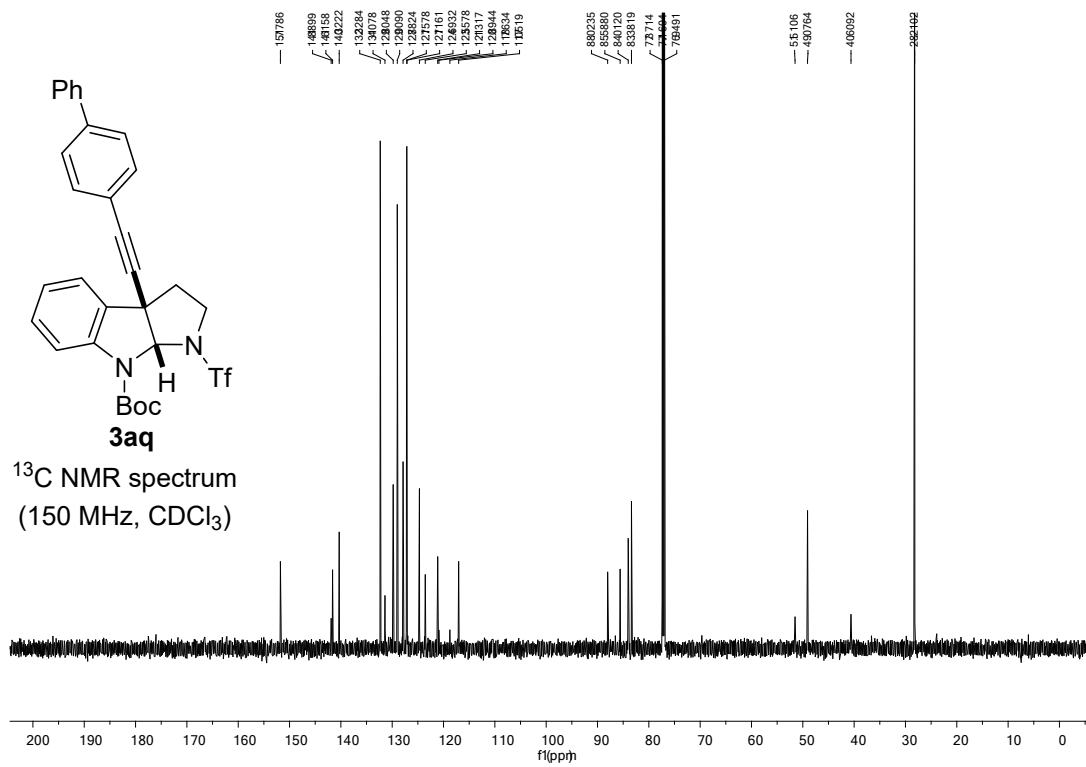

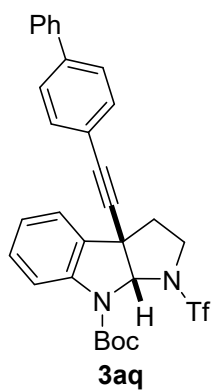

<sup>19</sup>F NMR spectrum  
(564 MHz, CDCl<sub>3</sub>)

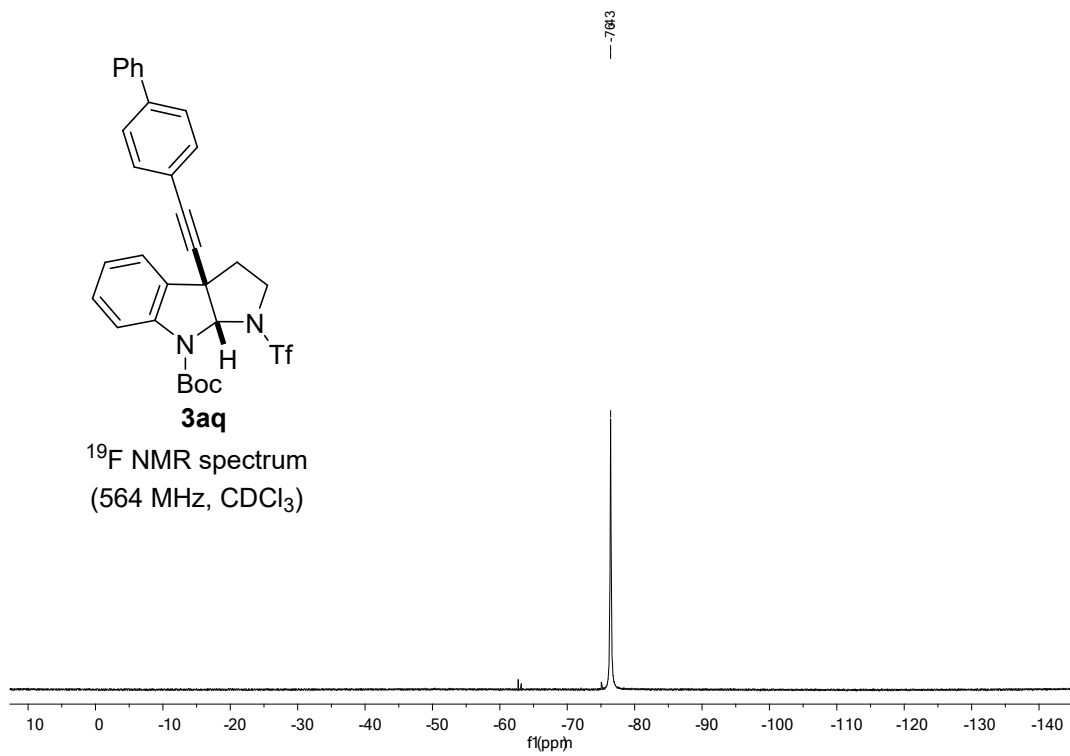



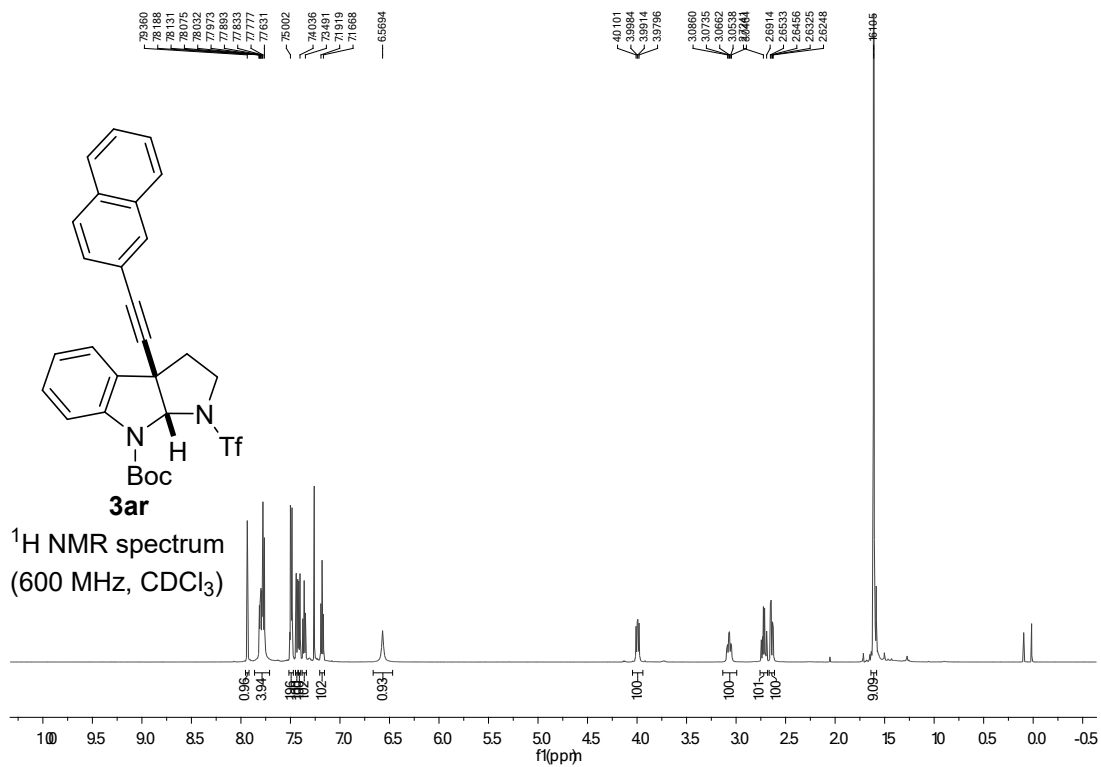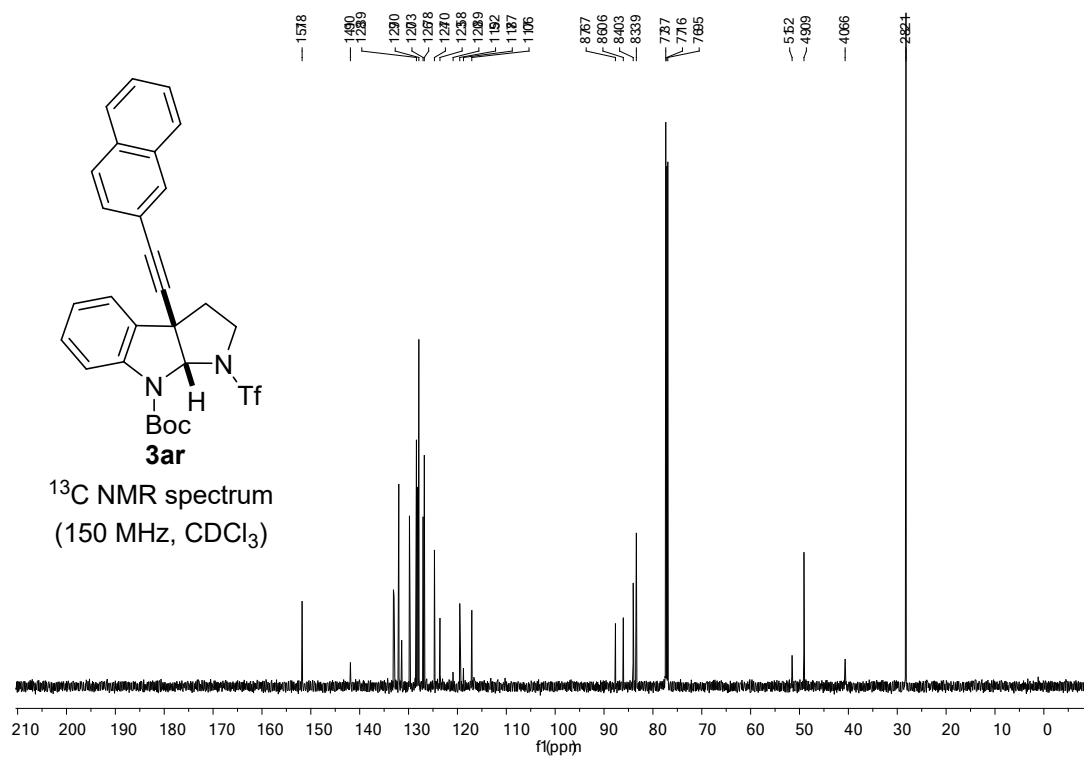

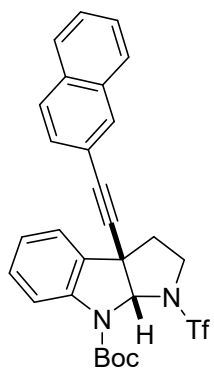

<sup>19</sup>F NMR spectrum  
(564 MHz, CDCl<sub>3</sub>)

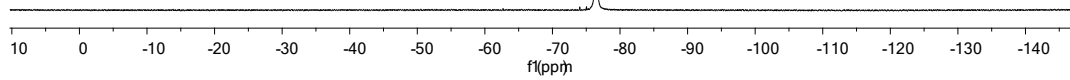

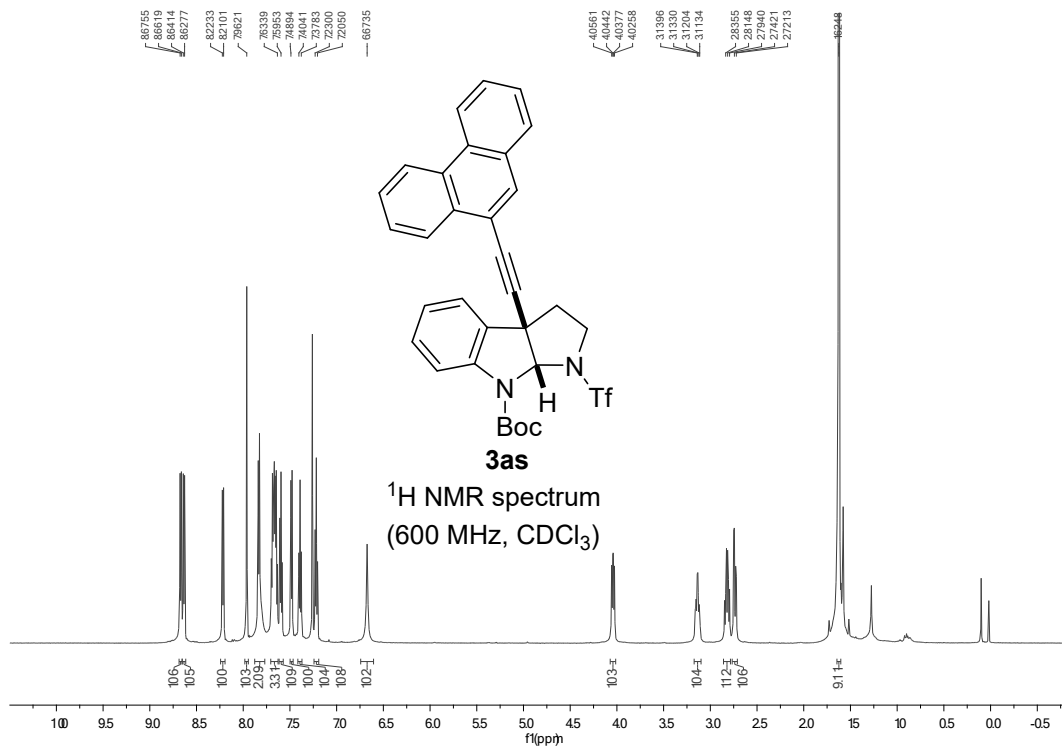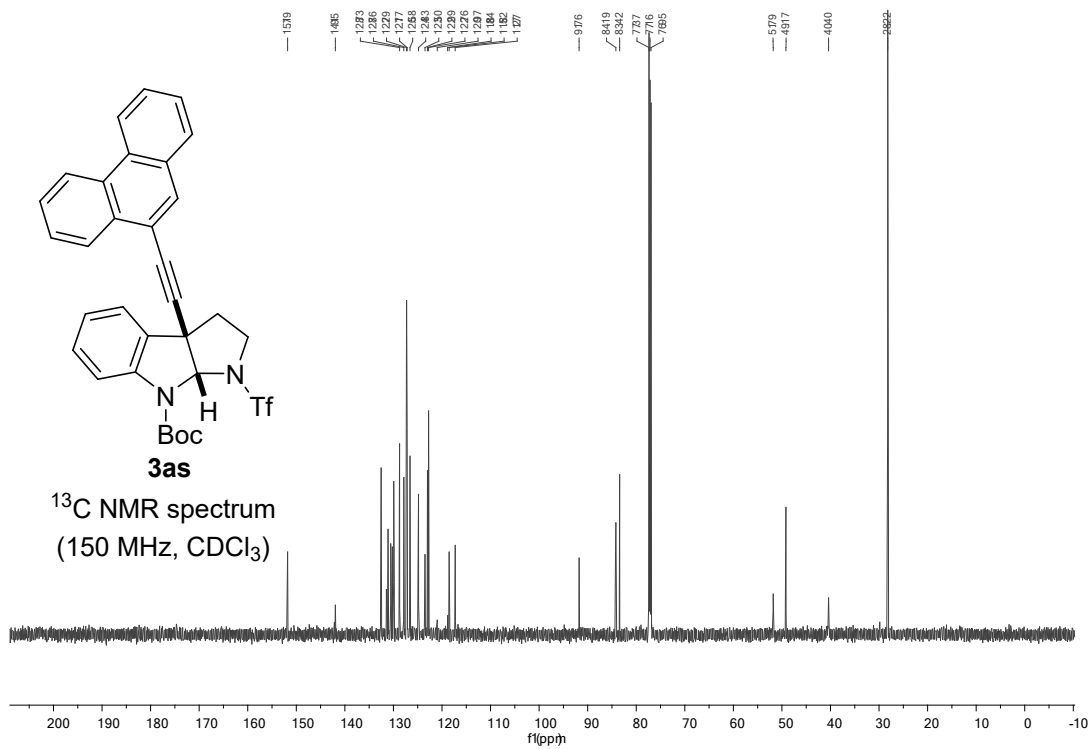

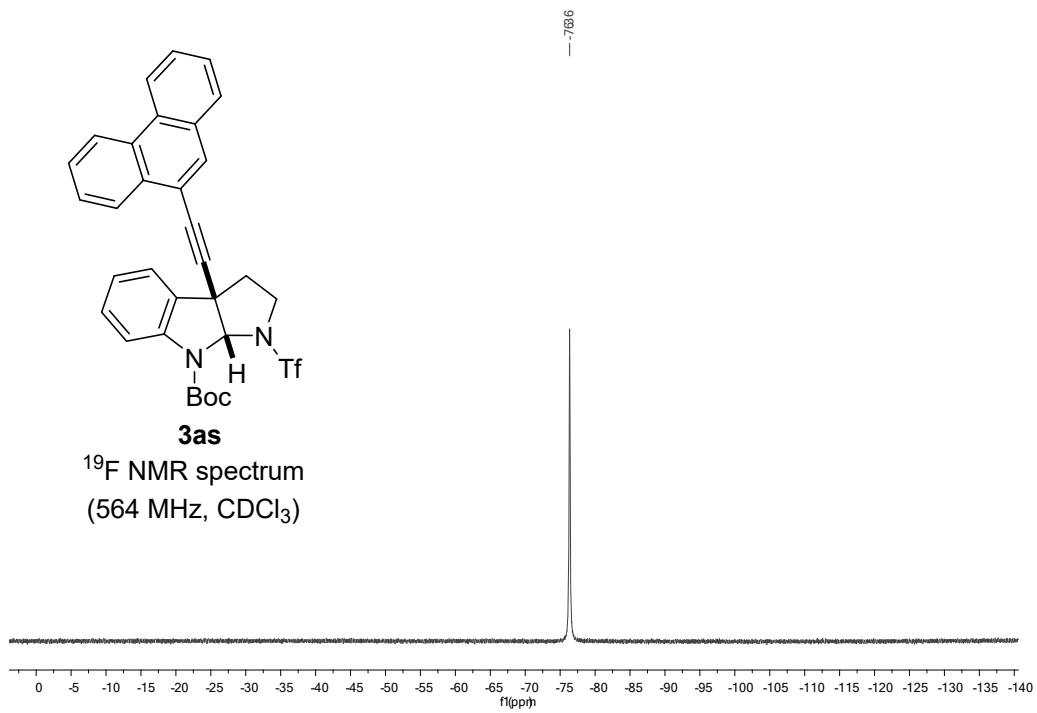

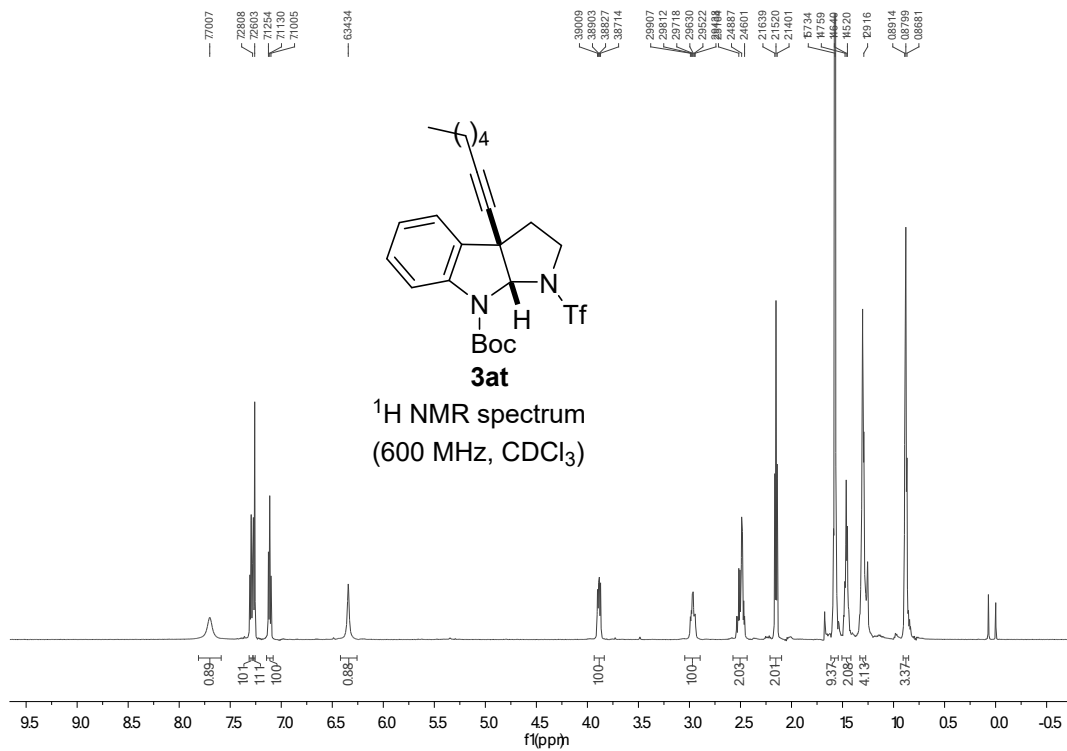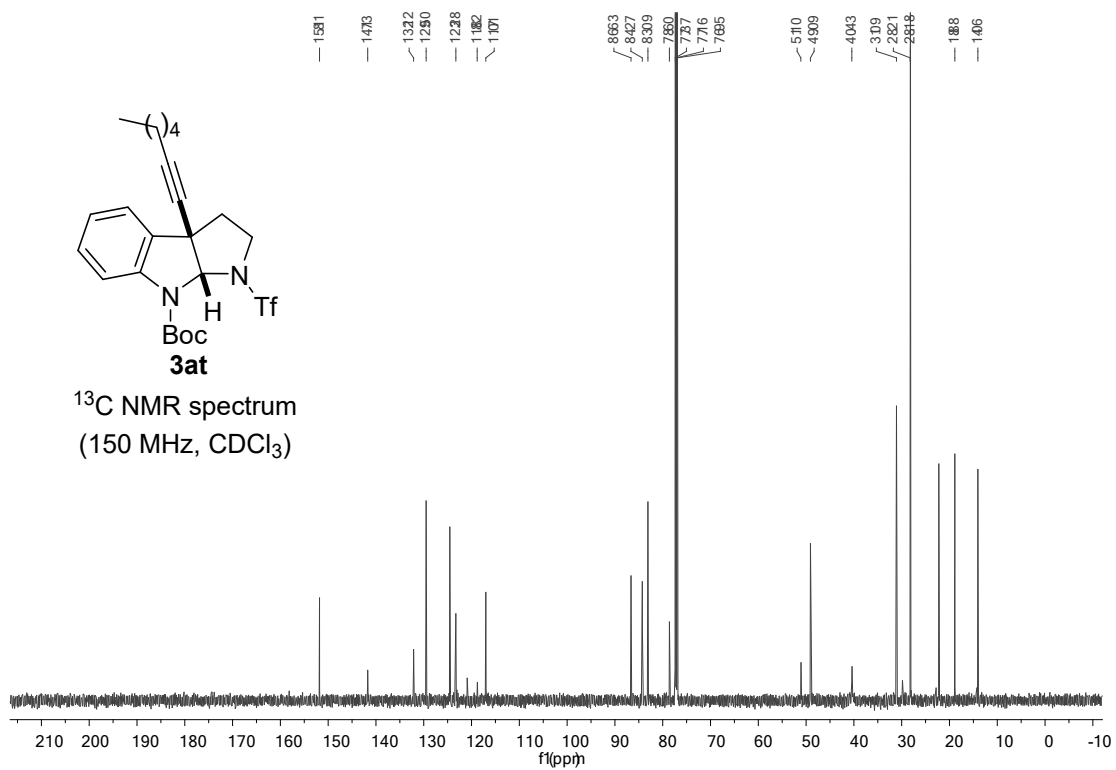

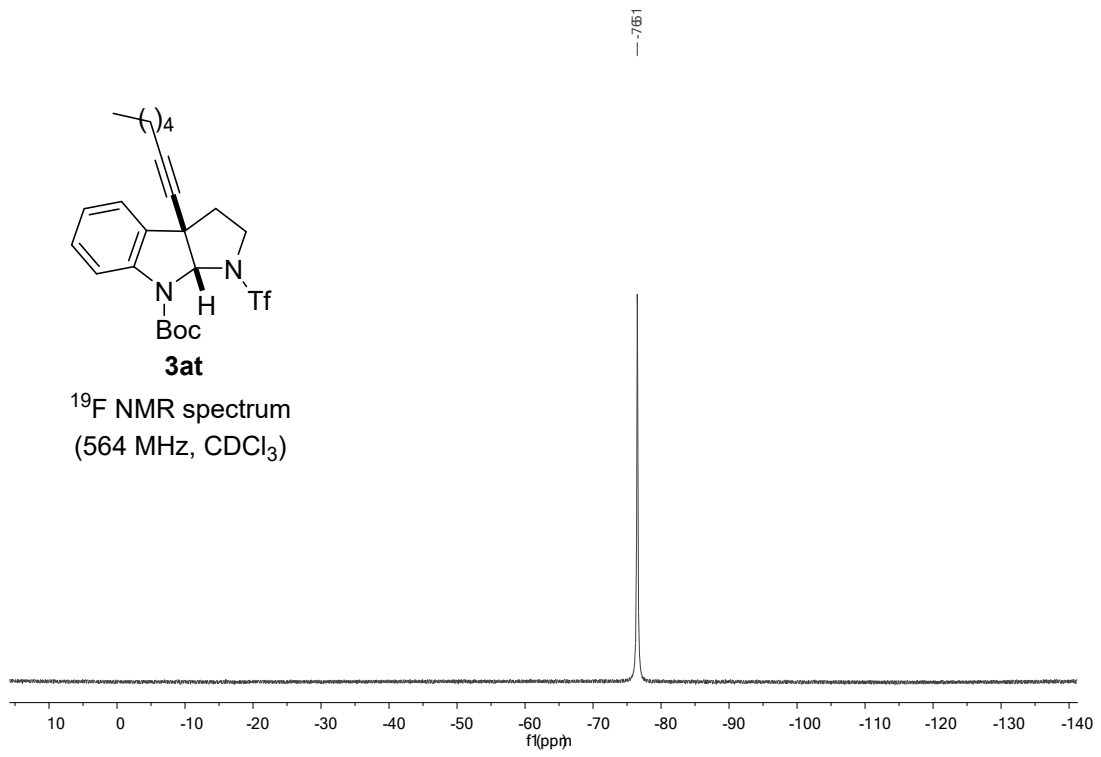

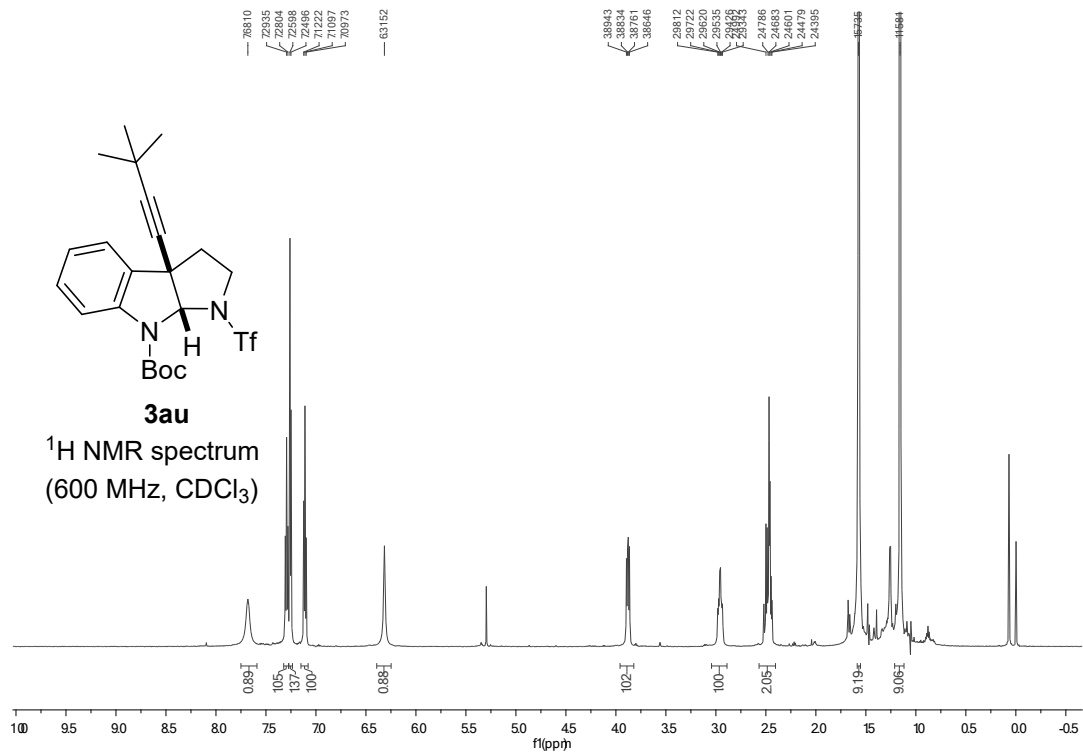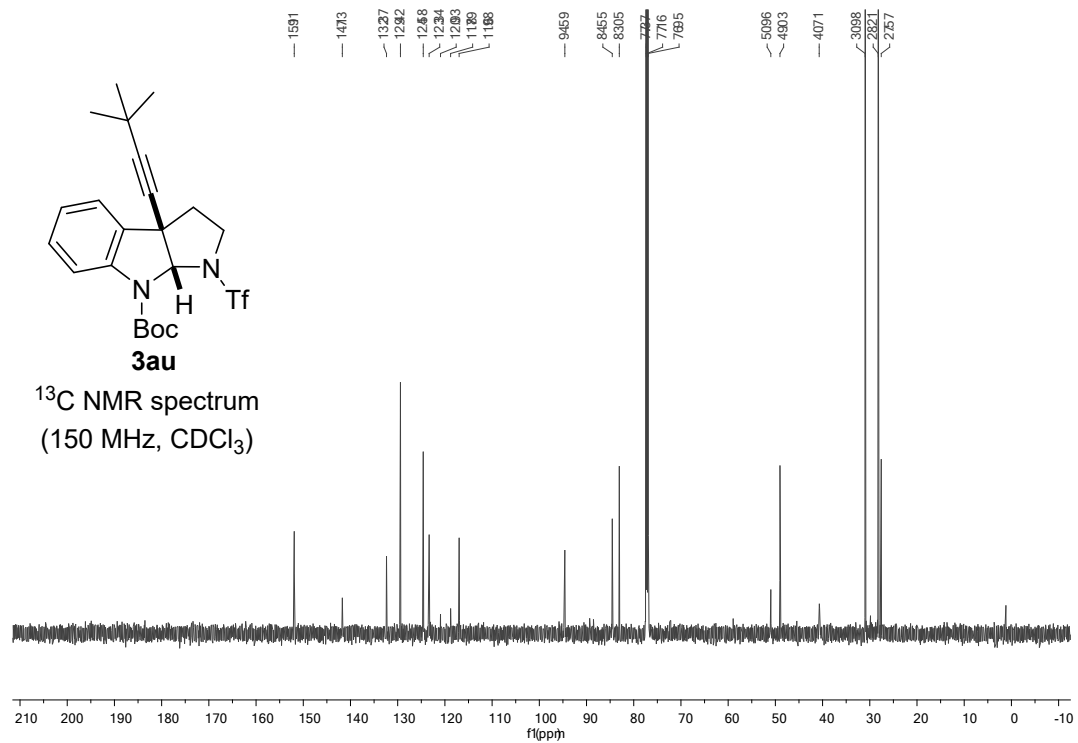

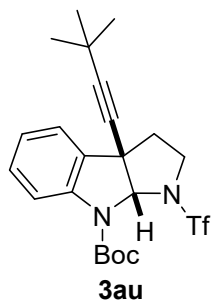

<sup>19</sup>F NMR spectrum  
(564 MHz, CDCl<sub>3</sub>)

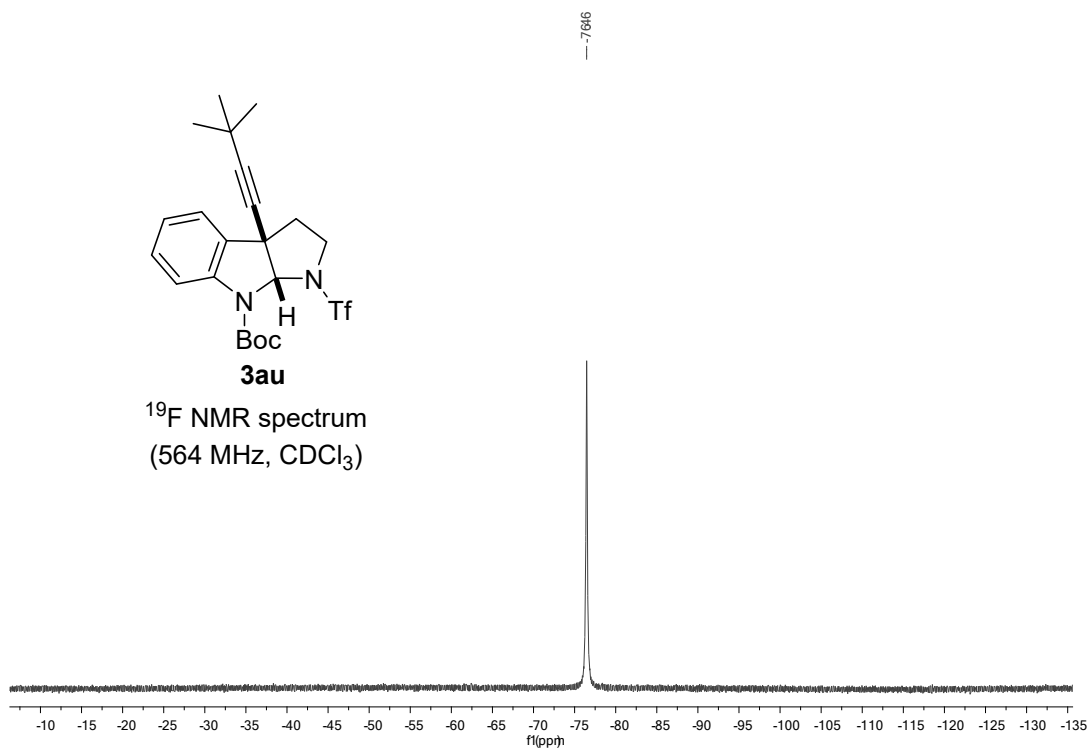



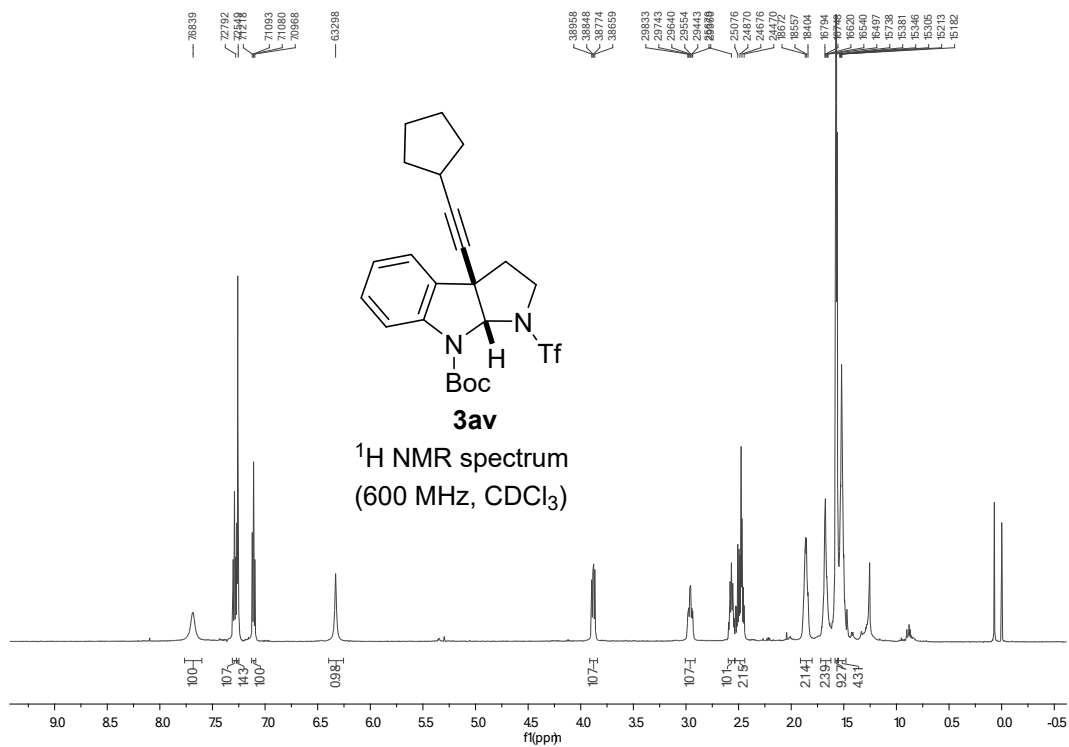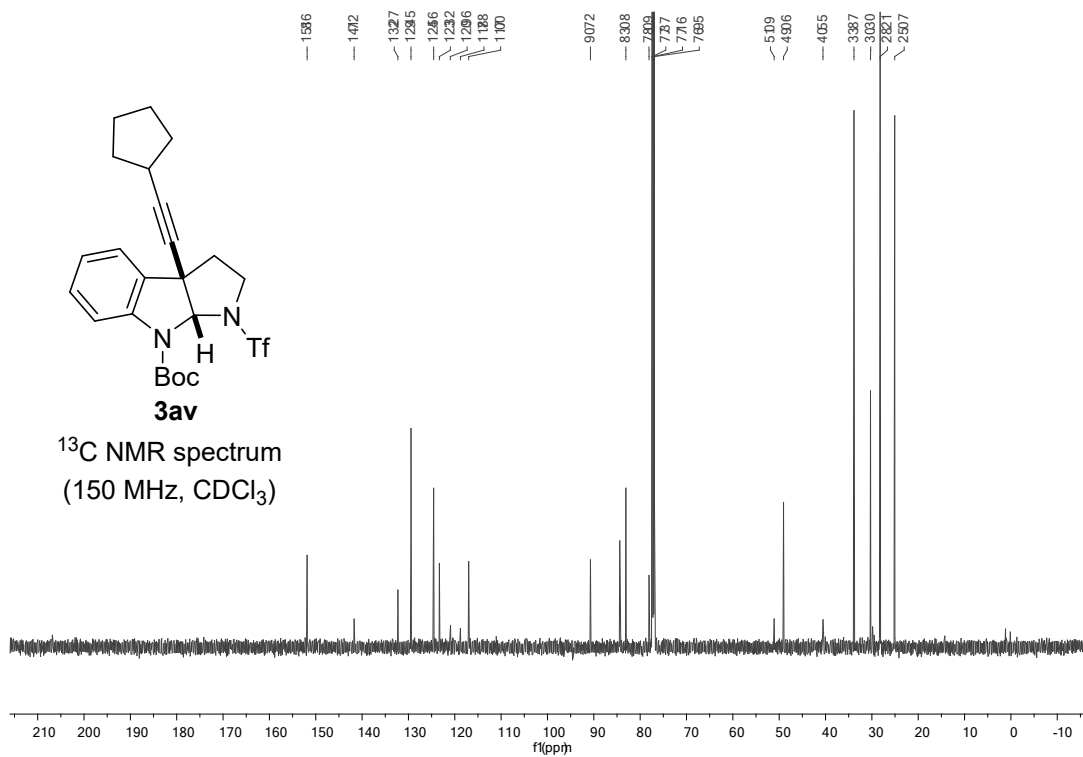

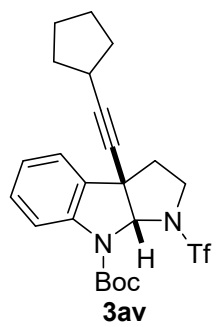

<sup>19</sup>F NMR spectrum  
(564 MHz, CDCl<sub>3</sub>)

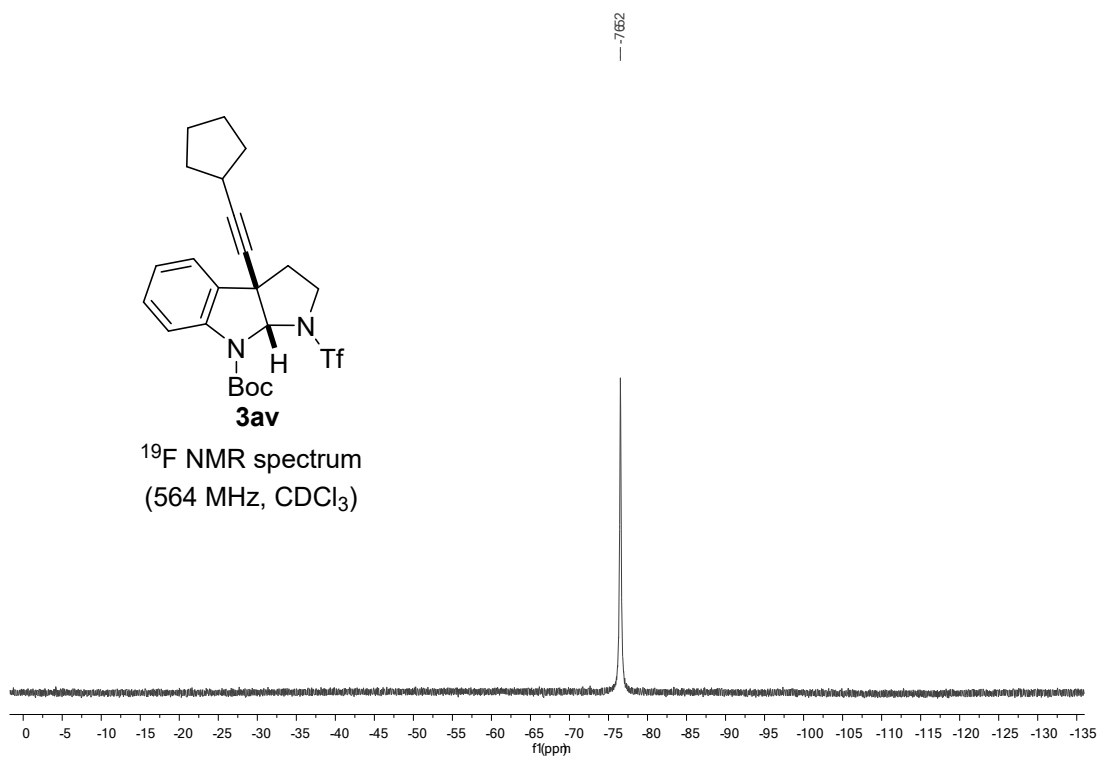

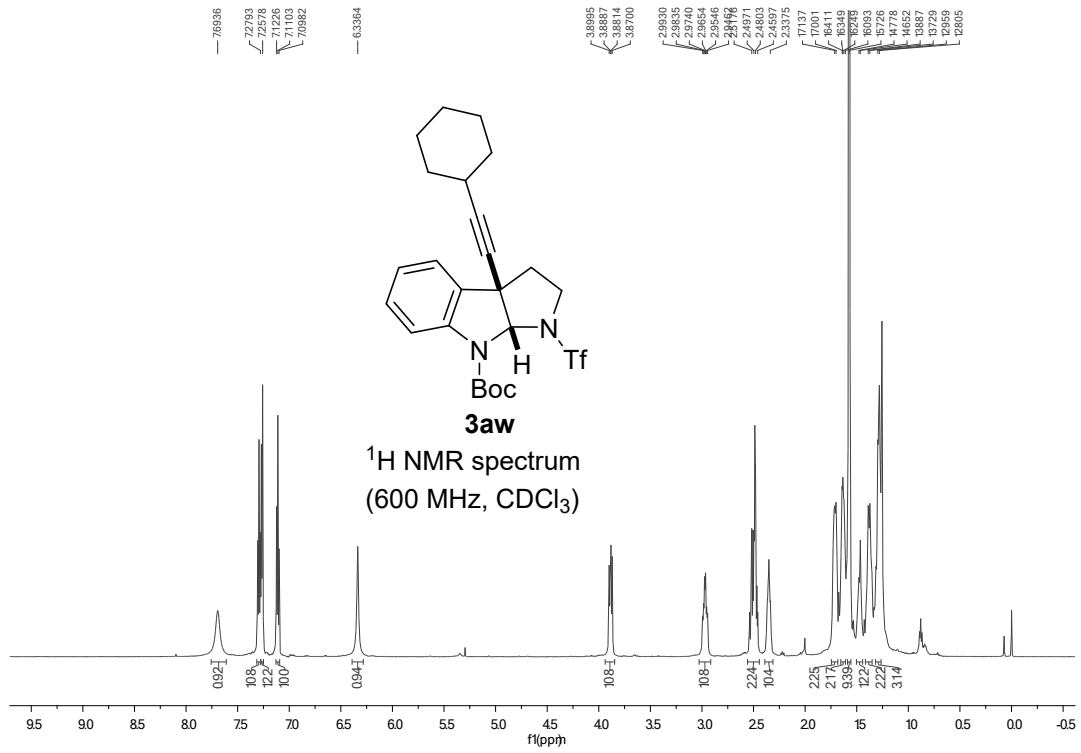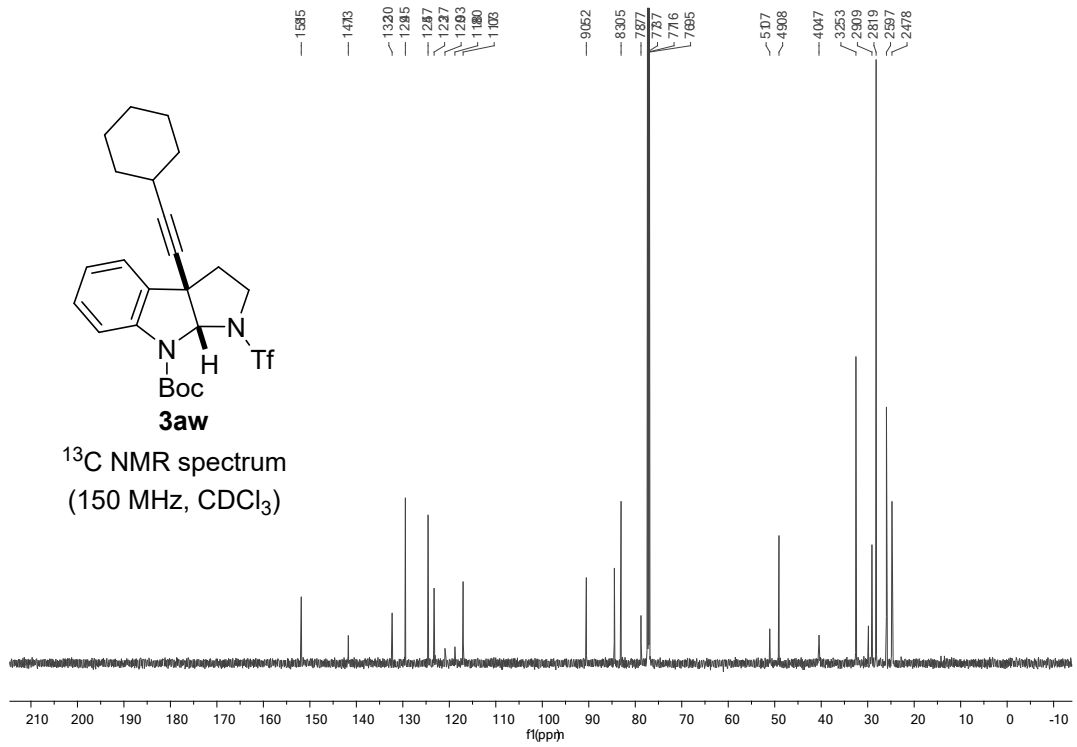



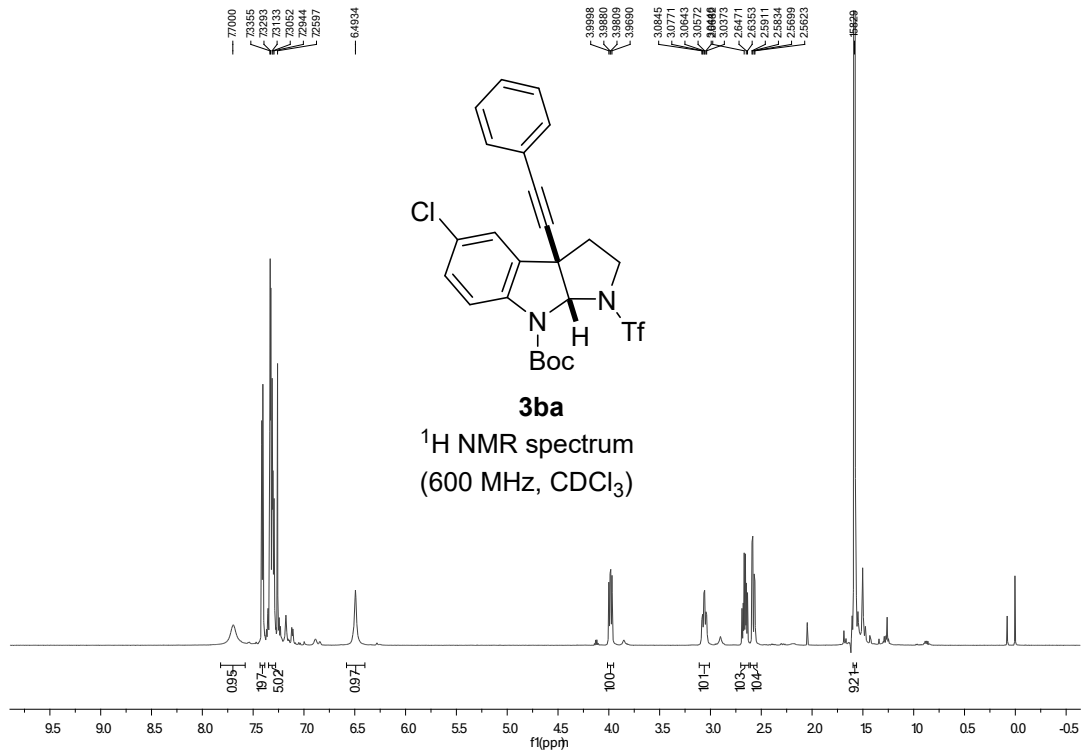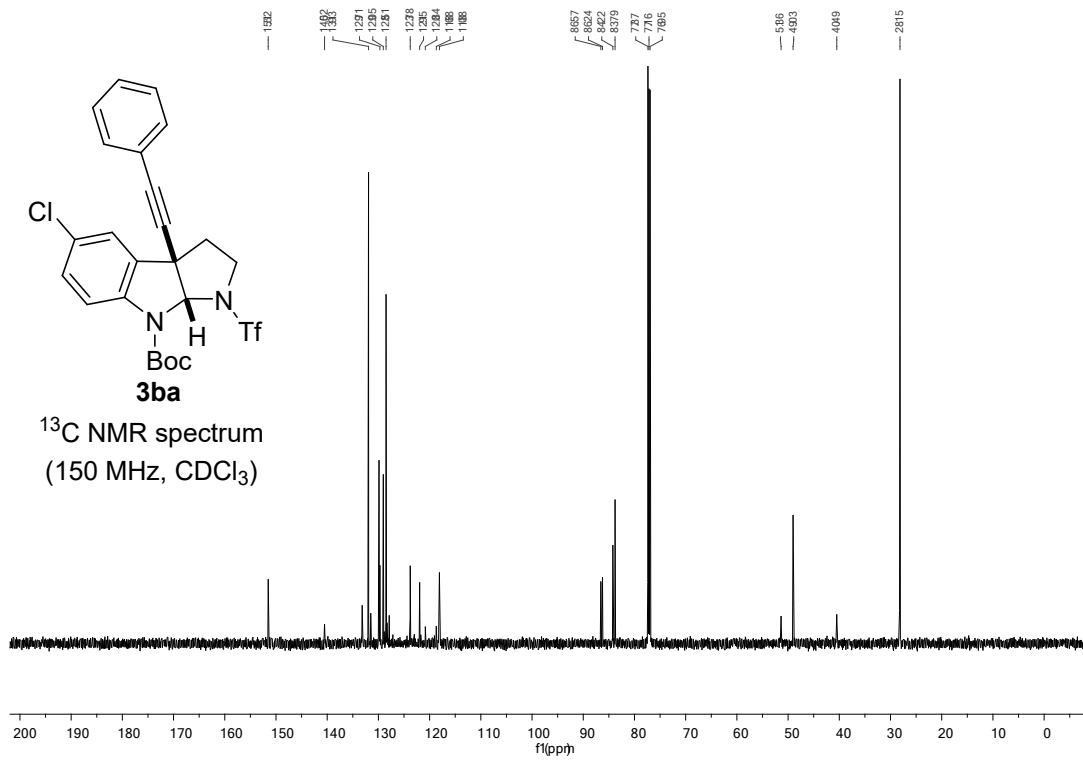

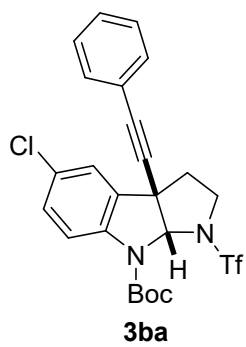

<sup>19</sup>F NMR spectrum  
(564 MHz, CDCl<sub>3</sub>)

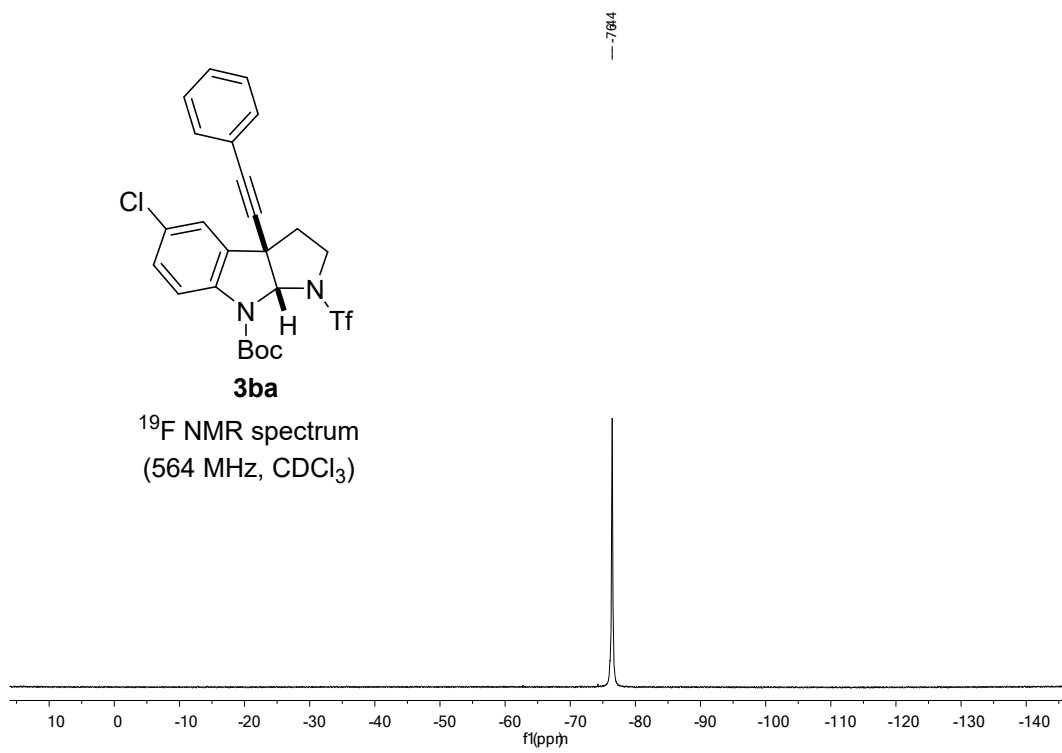

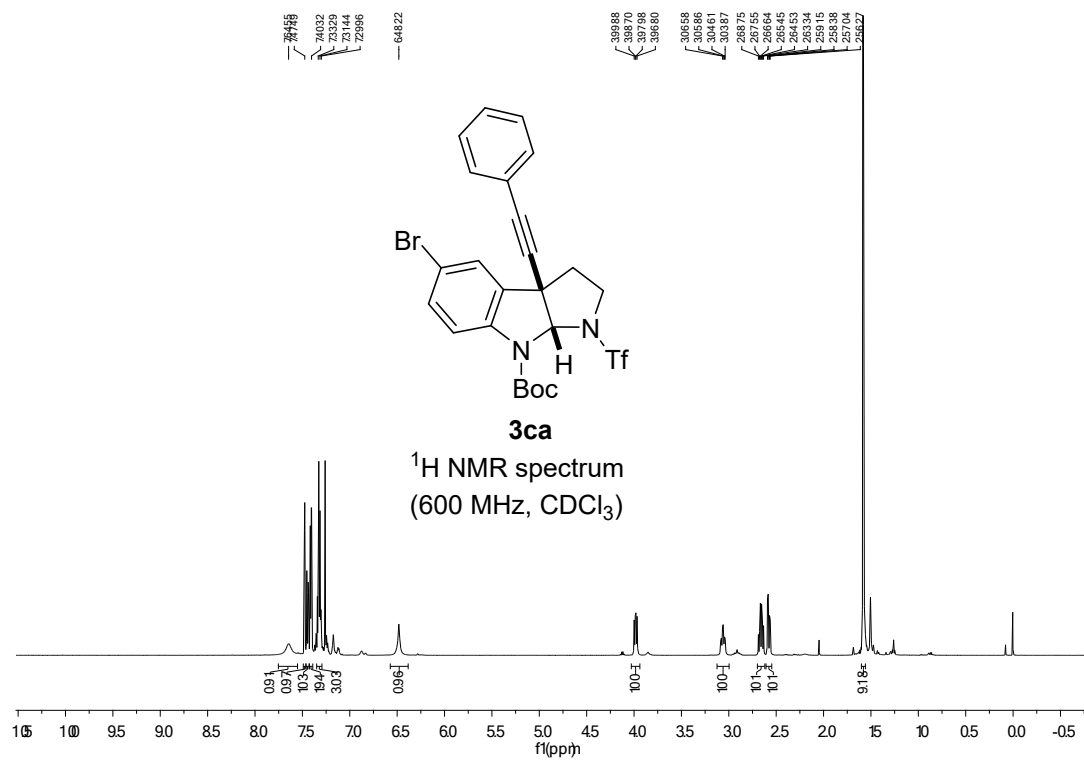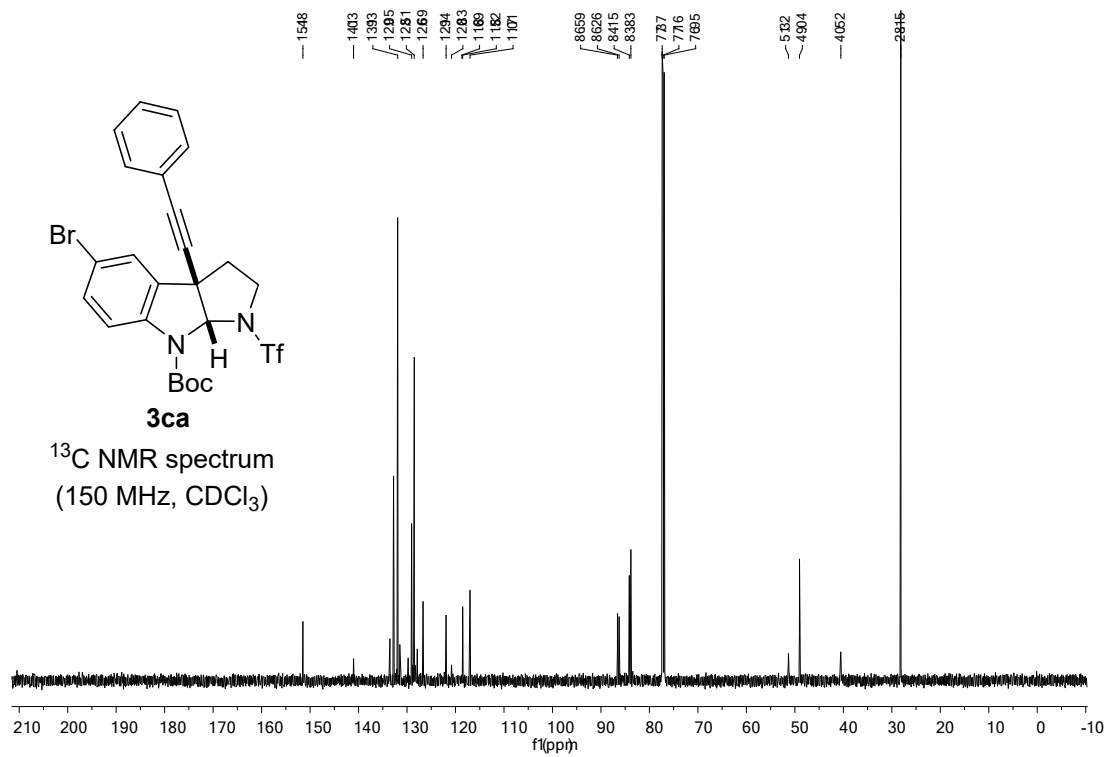

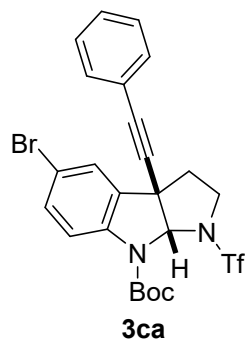

$^{19}\text{F}$  NMR spectrum  
(564 MHz,  $\text{CDCl}_3$ )

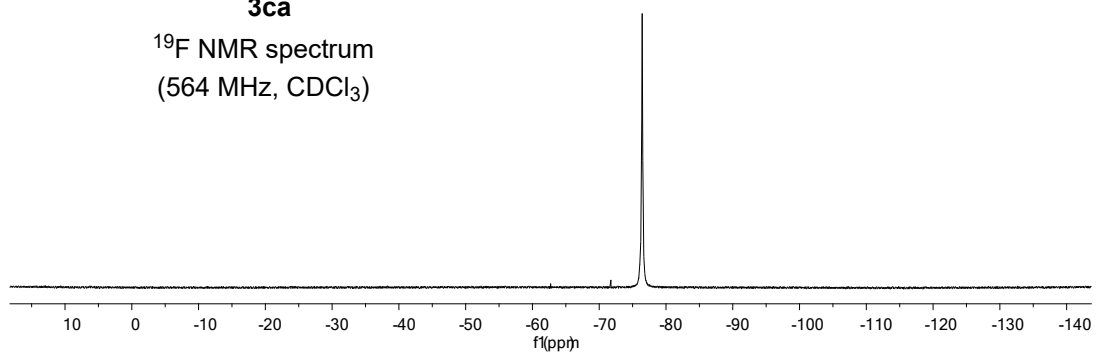



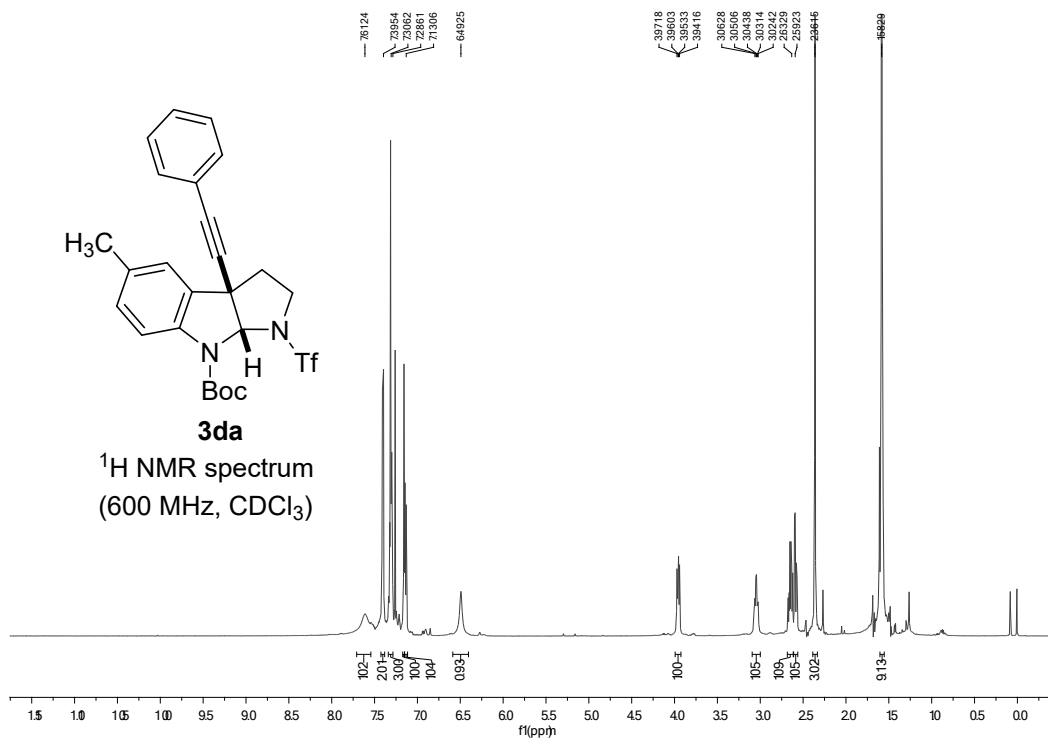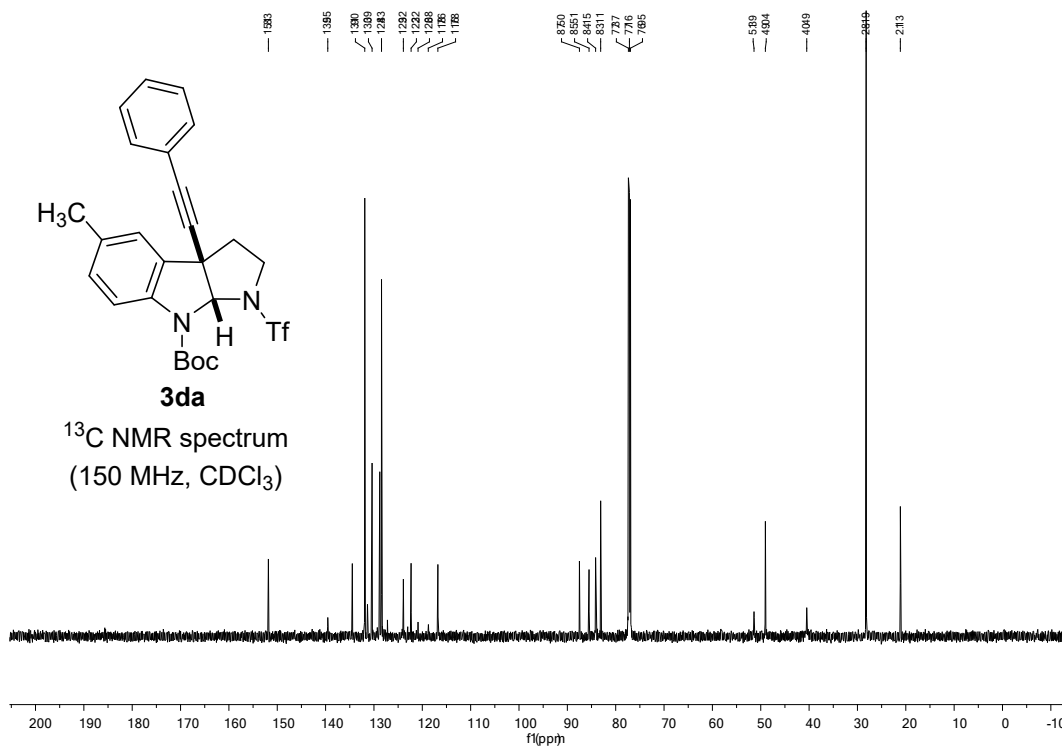

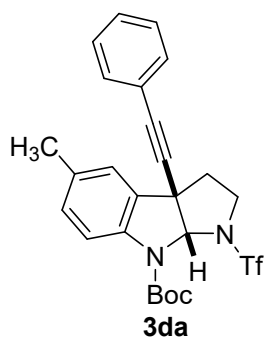

<sup>19</sup>F NMR spectrum  
(564 MHz, CDCl<sub>3</sub>)

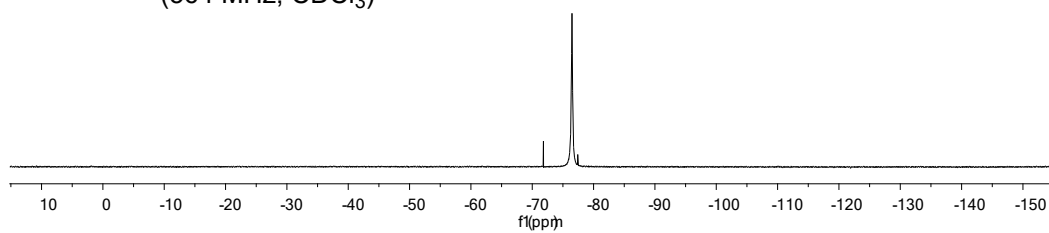

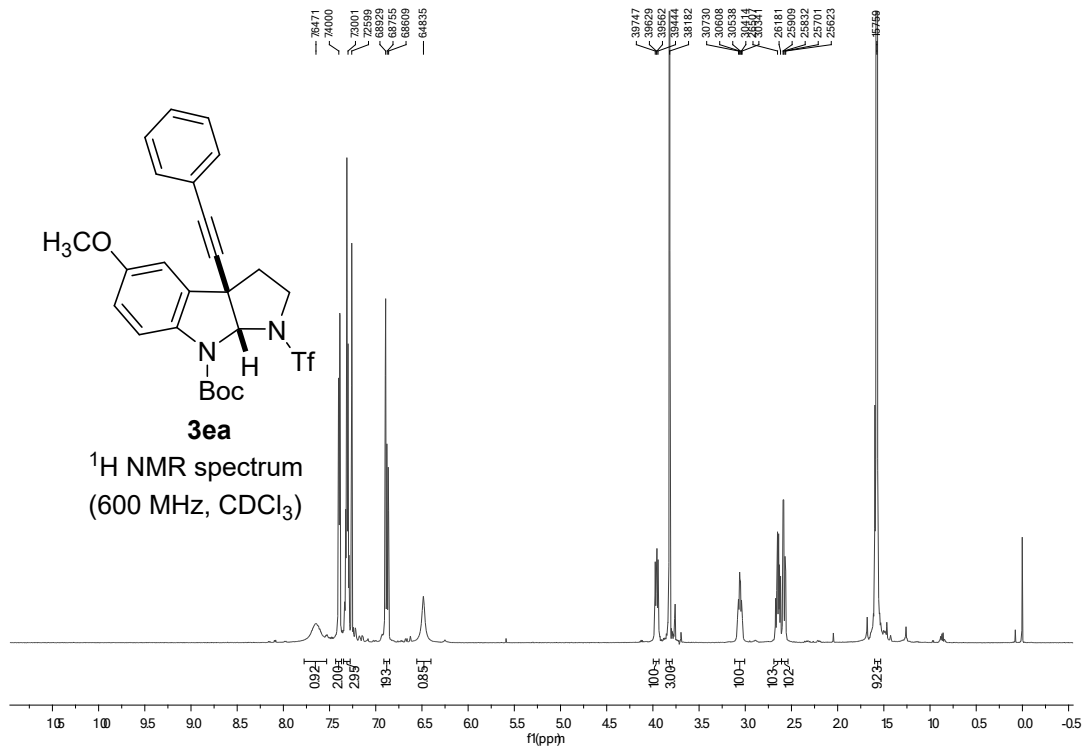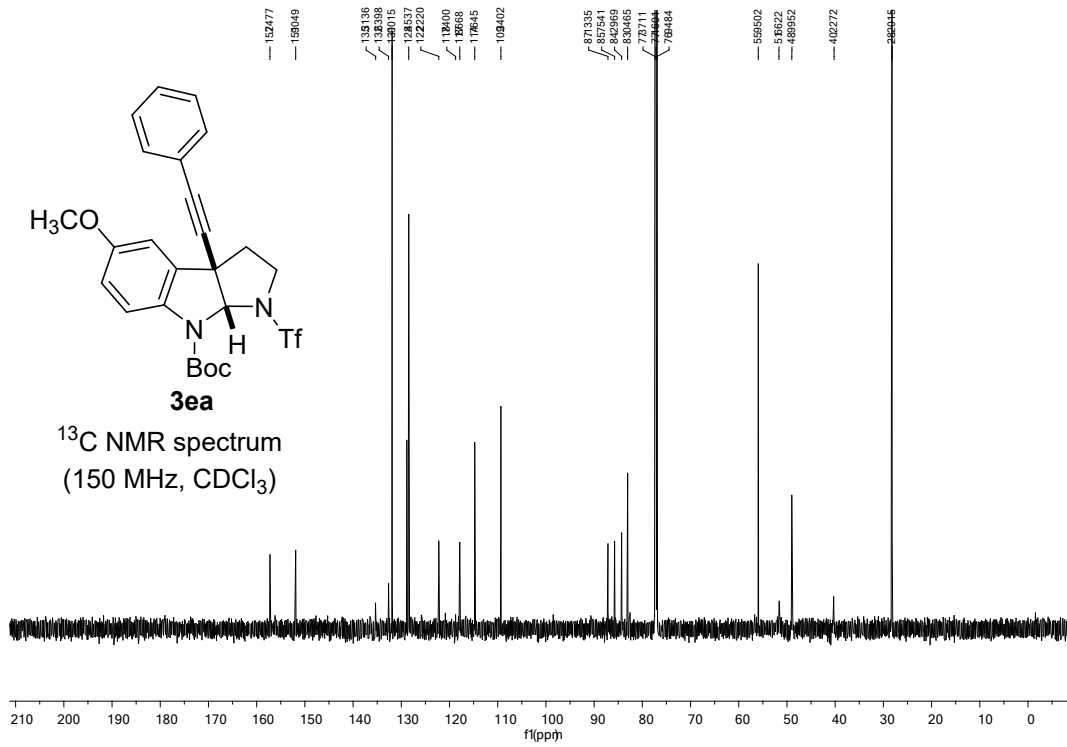

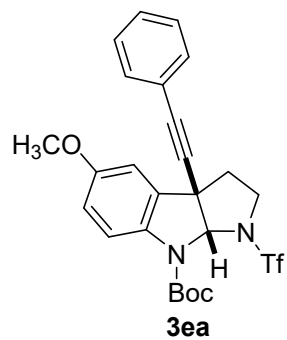

<sup>19</sup>F NMR spectrum  
(564 MHz, CDCl<sub>3</sub>)

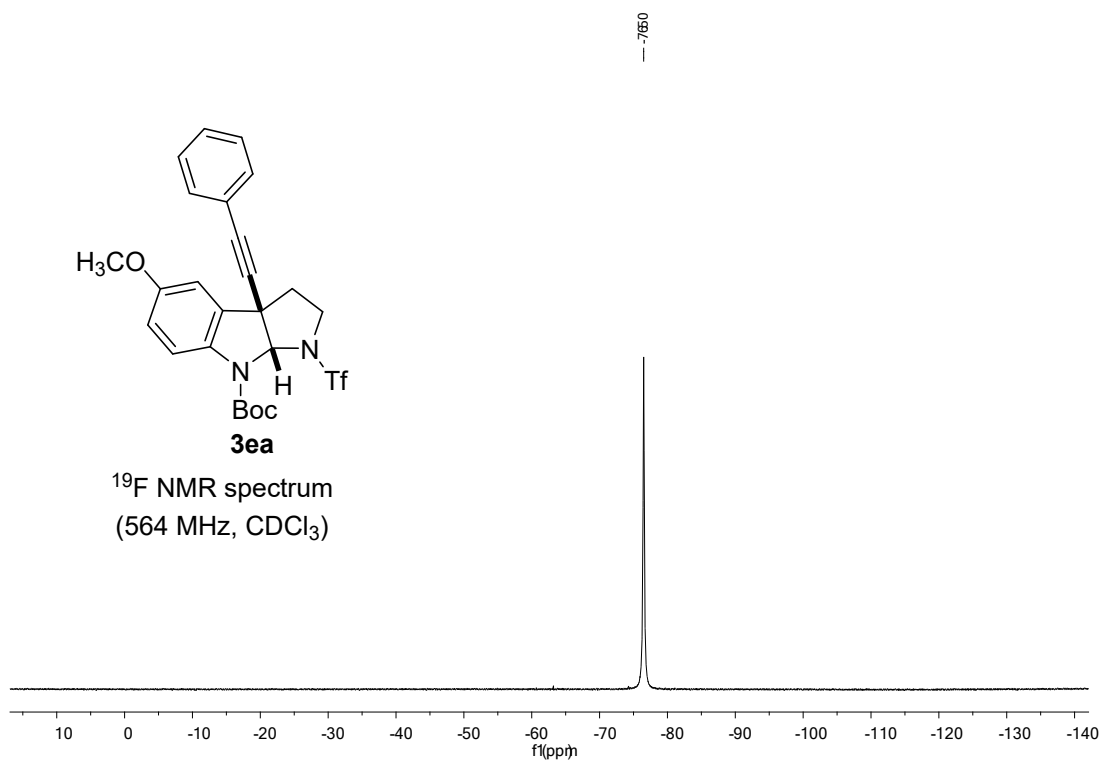



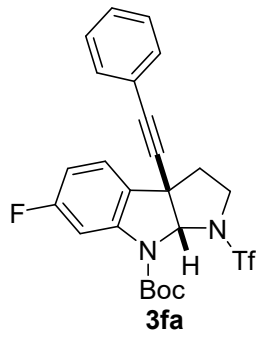

<sup>19</sup>F NMR spectrum  
(564 MHz, CDCl<sub>3</sub>)

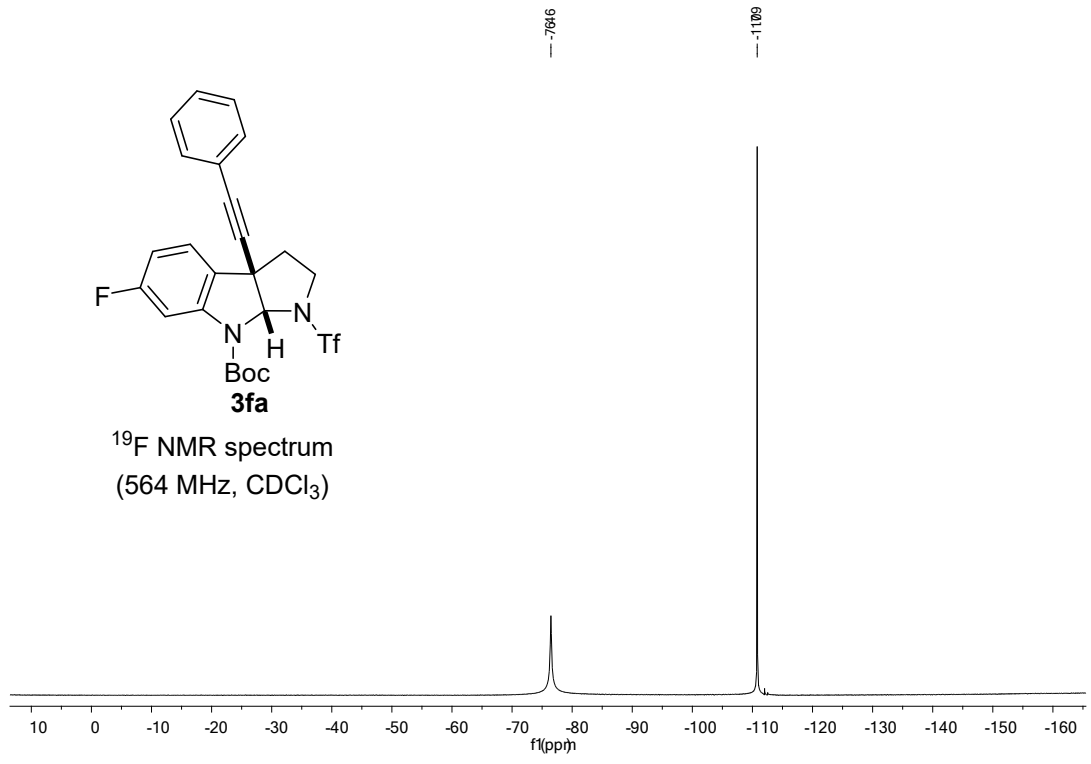

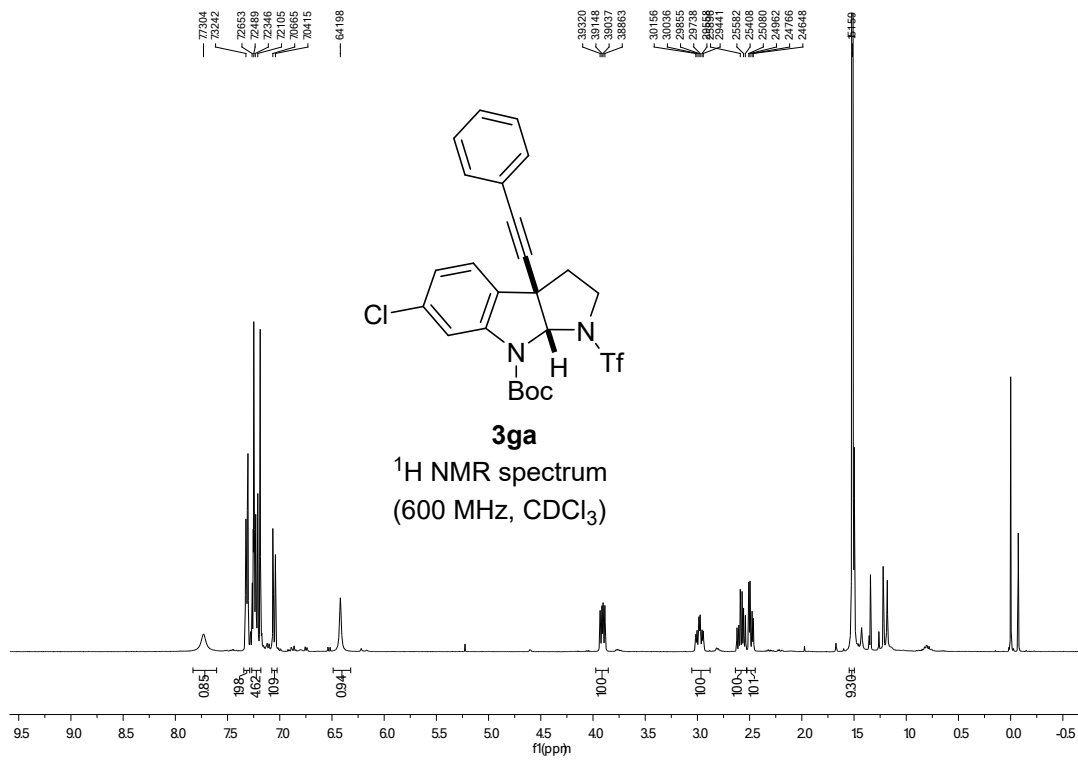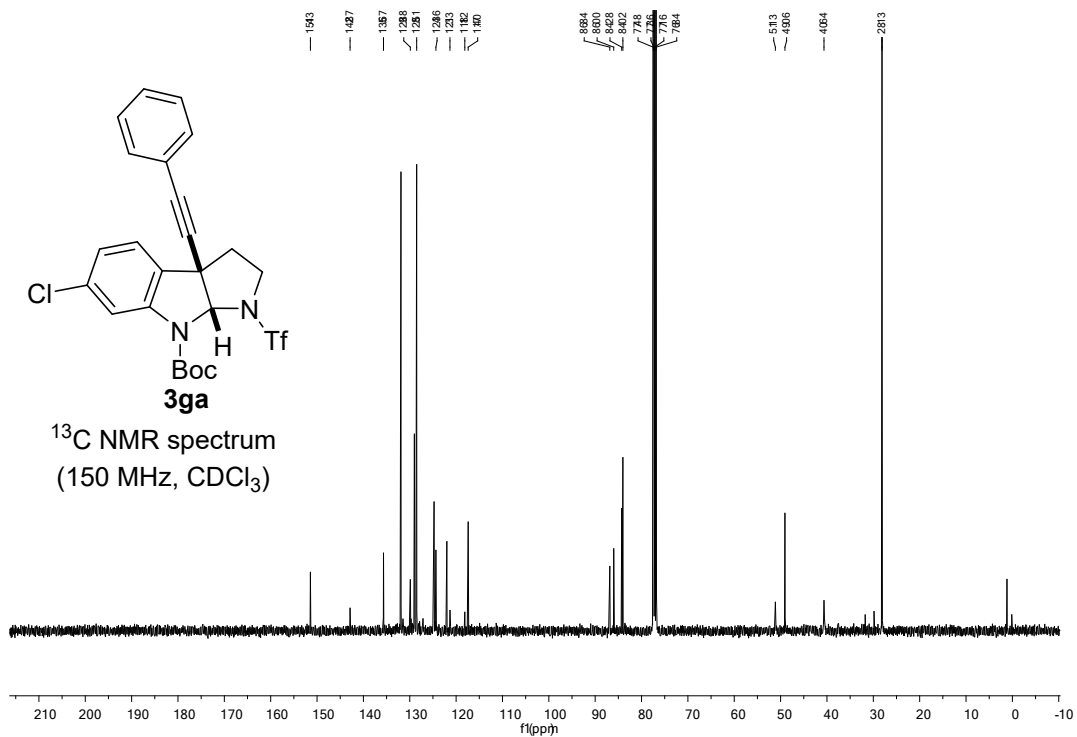

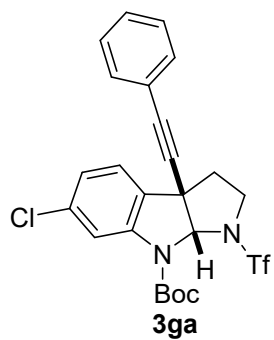

$^{19}\text{F}$  NMR spectrum  
(564 MHz,  $\text{CDCl}_3$ )

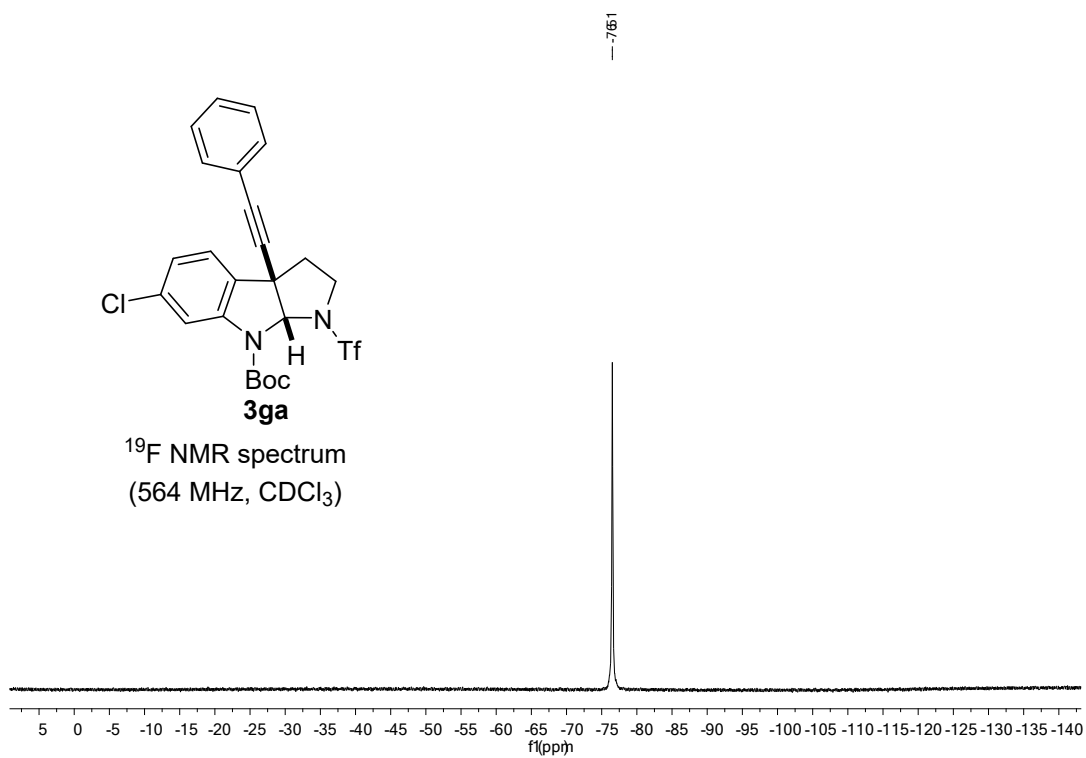



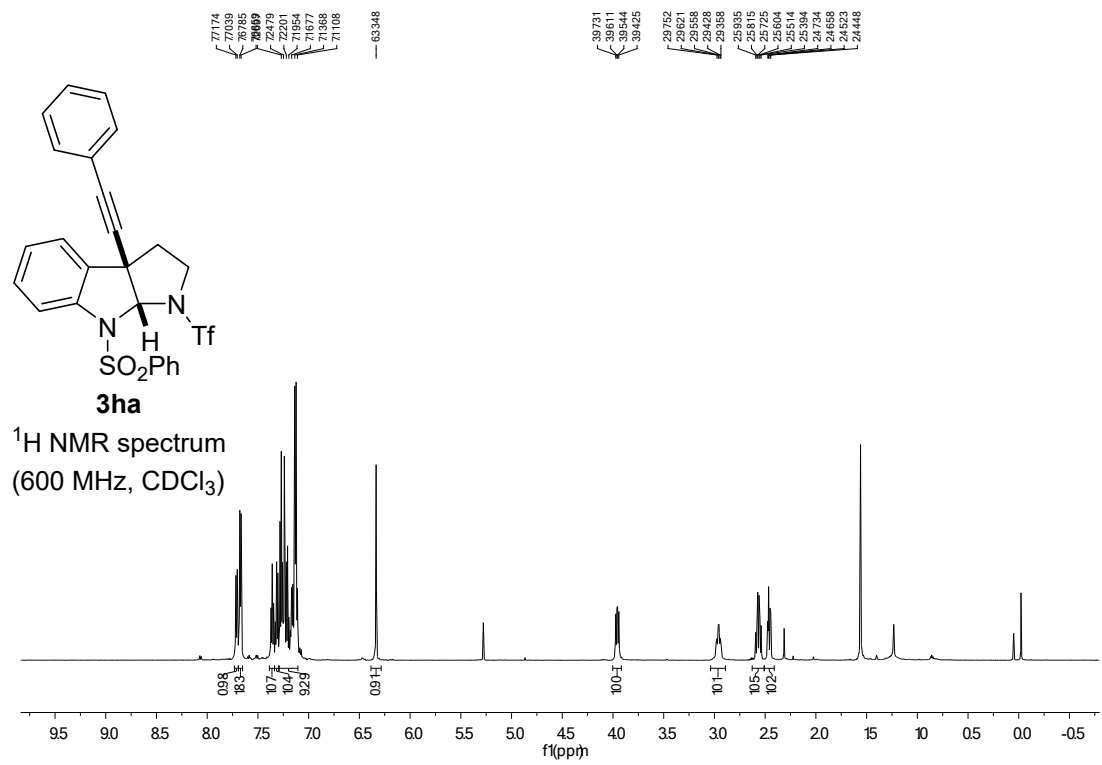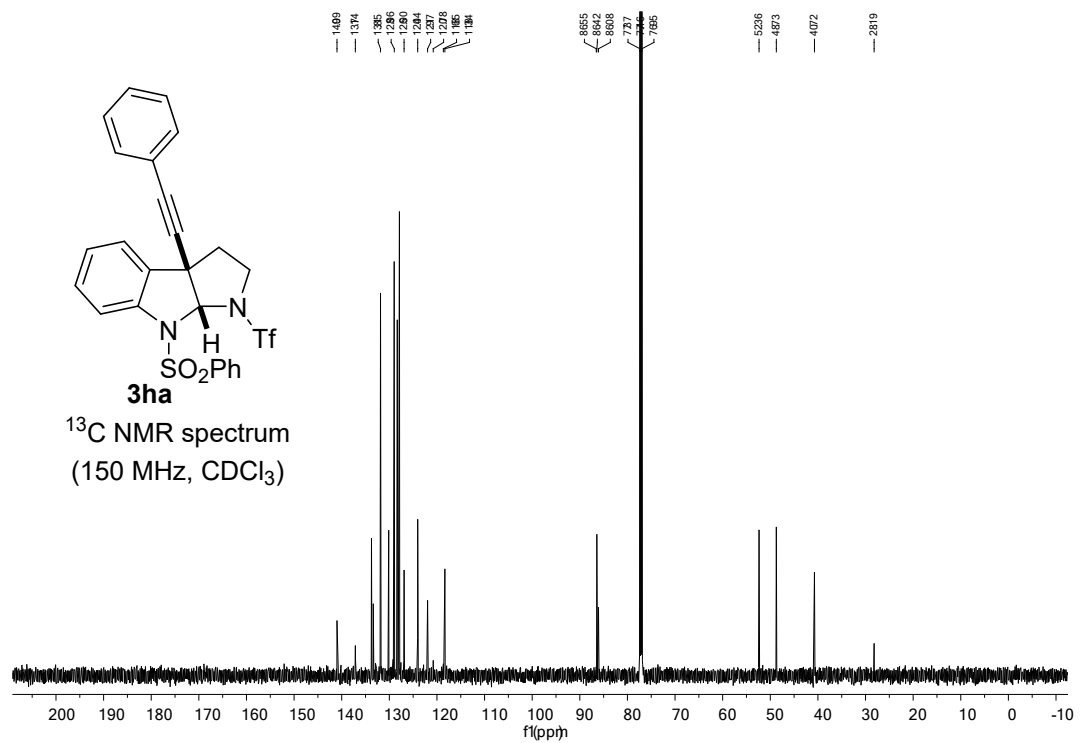

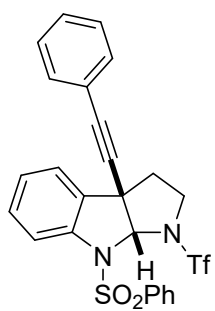

**3ha**

<sup>19</sup>F NMR spectrum  
(564 MHz, CDCl<sub>3</sub>)

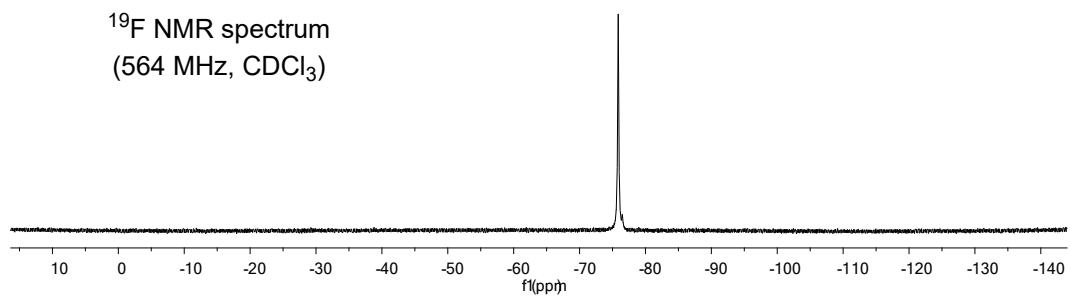

-75.6

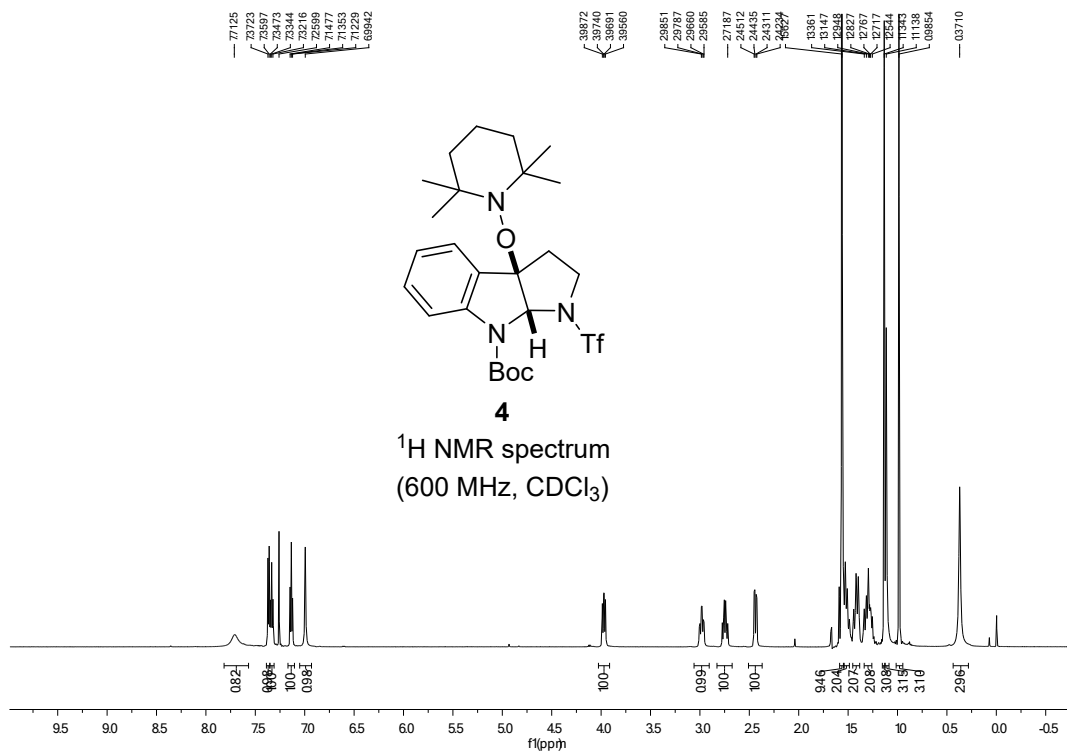

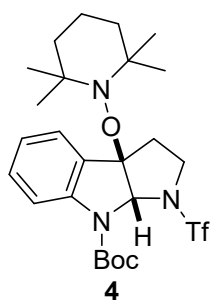

$^{19}\text{F}$  NMR spectrum  
(564 MHz,  $\text{CDCl}_3$ )

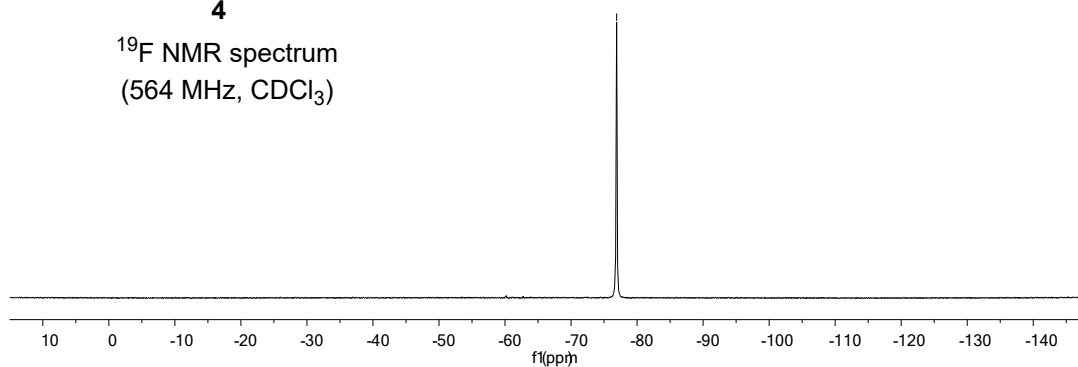

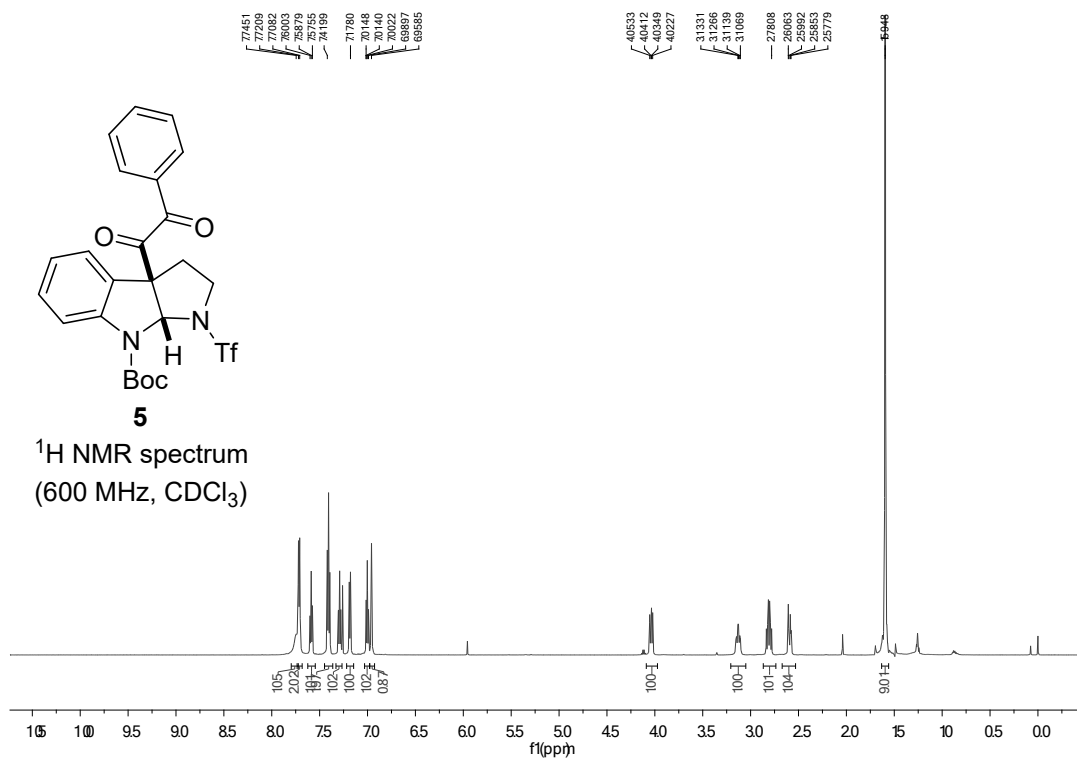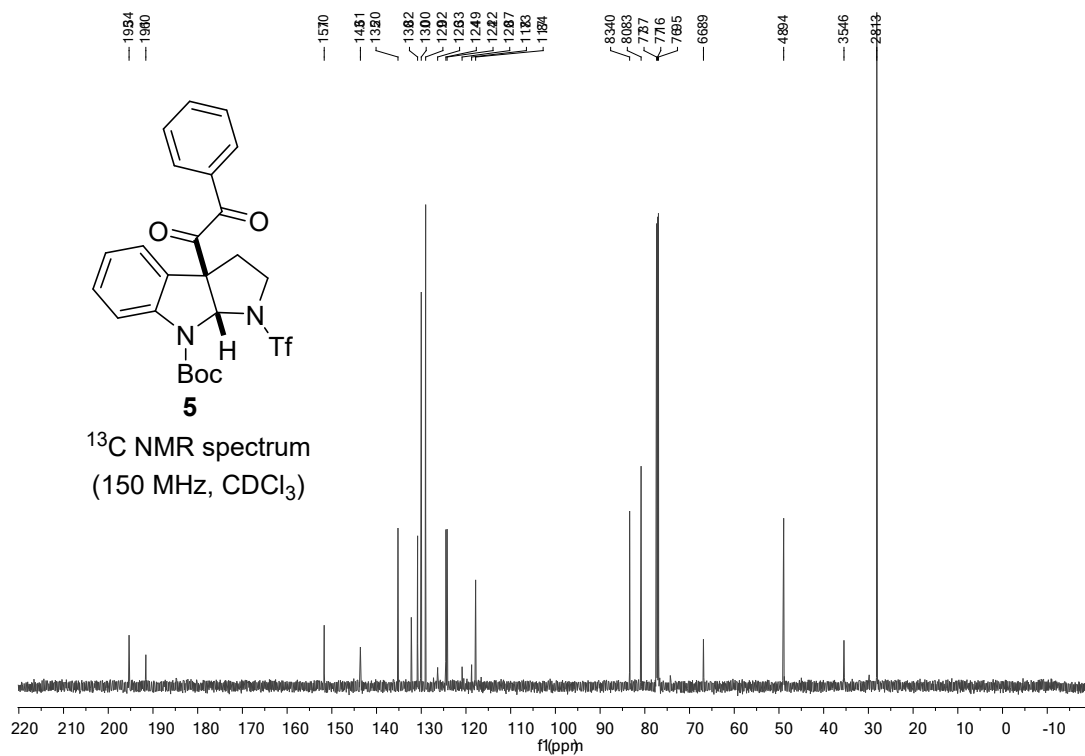

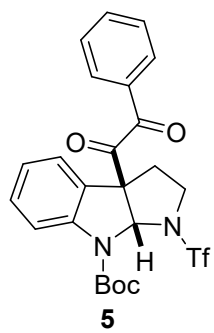

<sup>19</sup>F NMR spectrum  
(564 MHz, CDCl<sub>3</sub>)

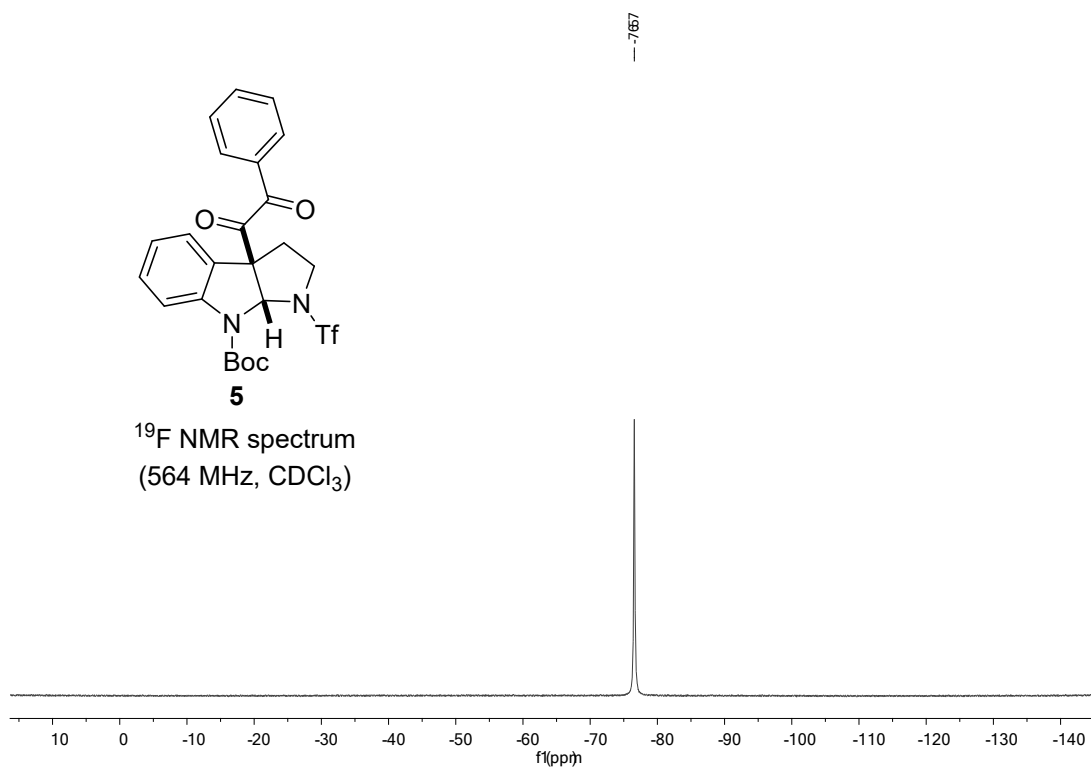

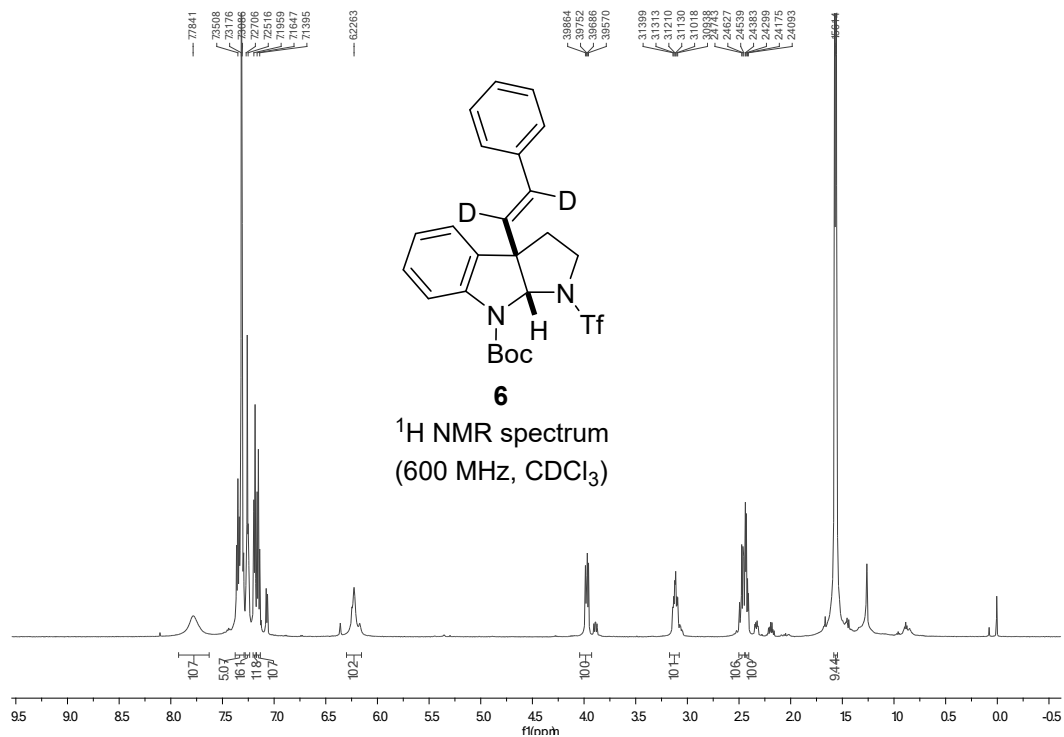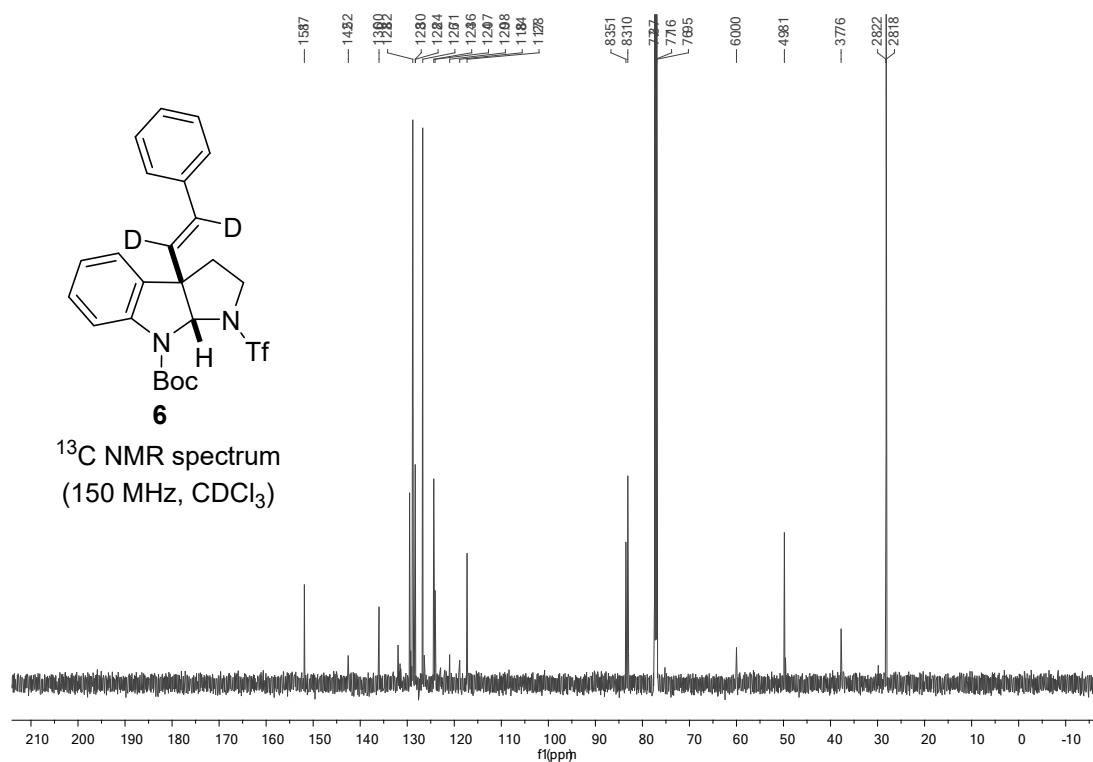

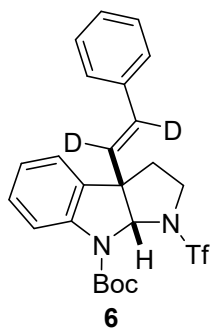

**6**  
<sup>19</sup>F NMR spectrum  
(564 MHz, CDCl<sub>3</sub>)

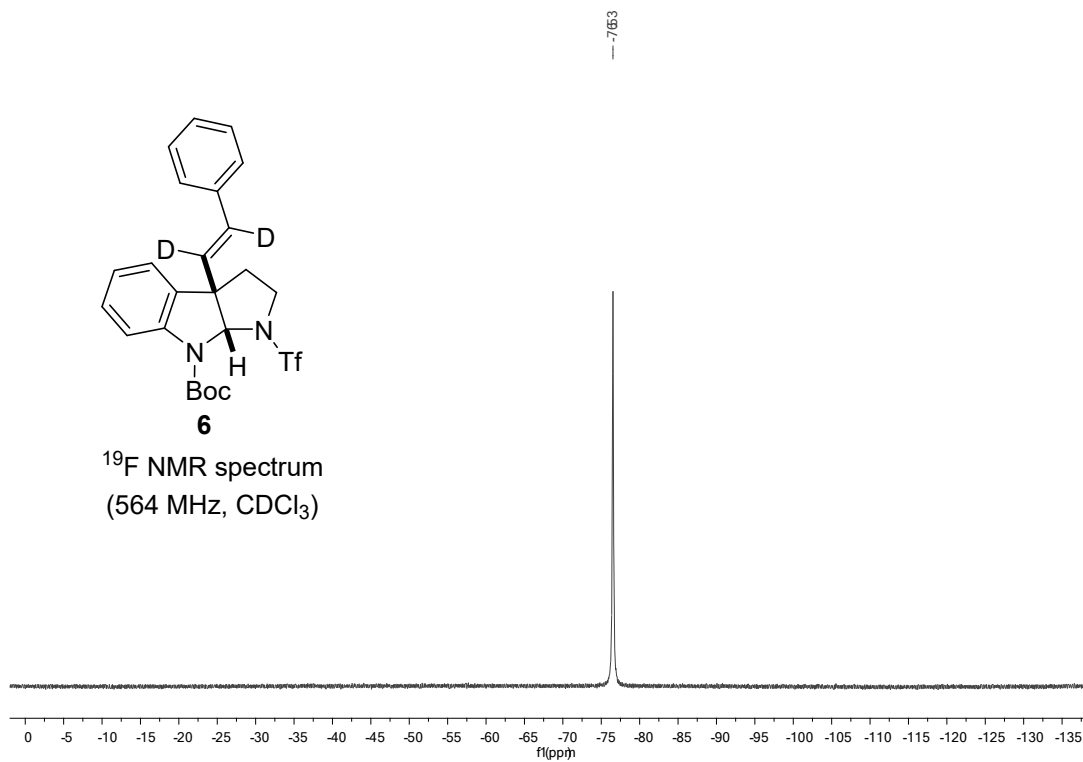



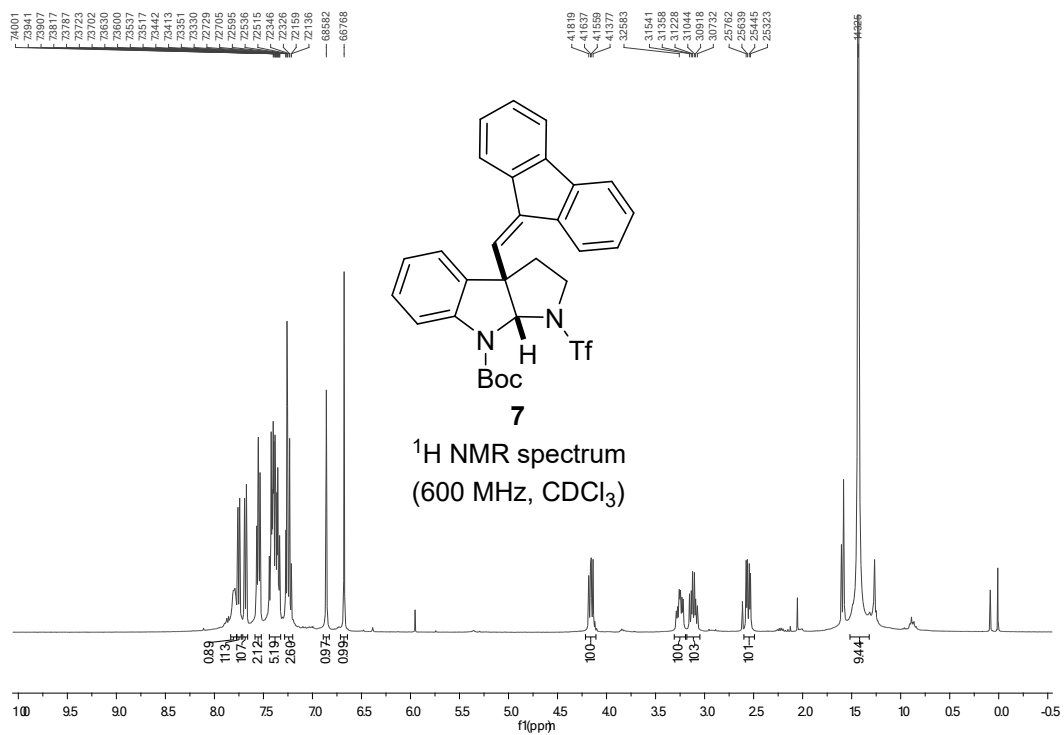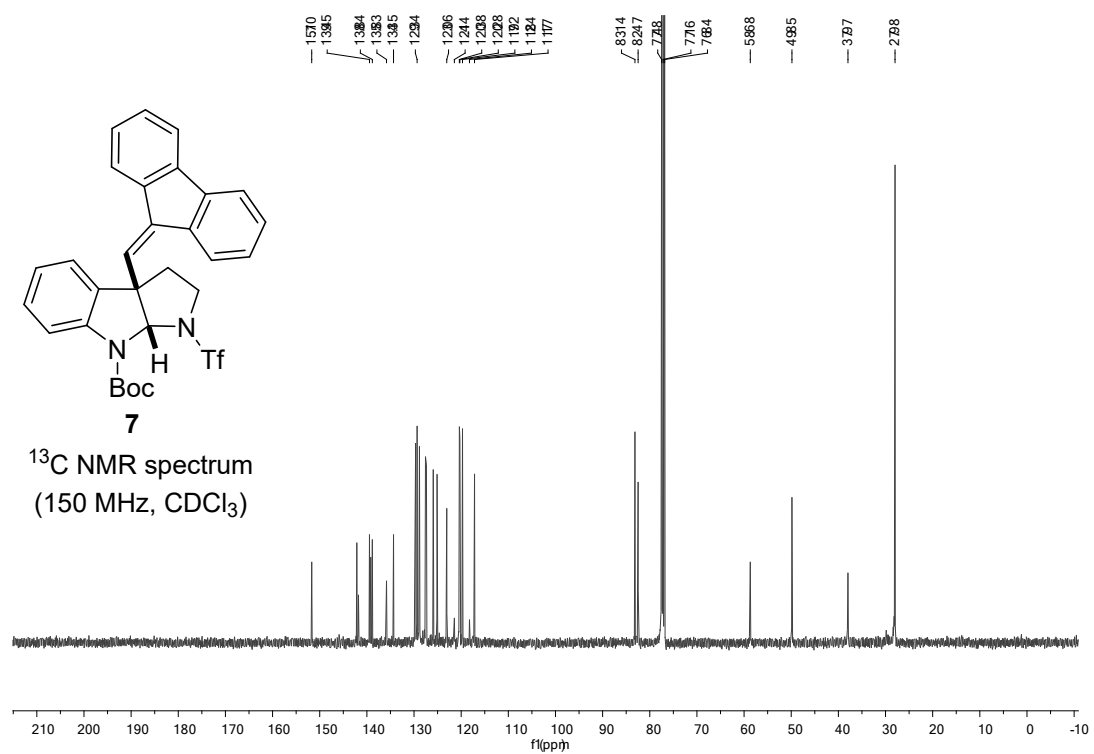

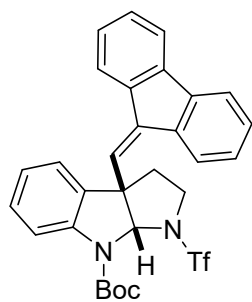

**7**  
<sup>19</sup>F NMR spectrum  
(564 MHz, CDCl<sub>3</sub>)

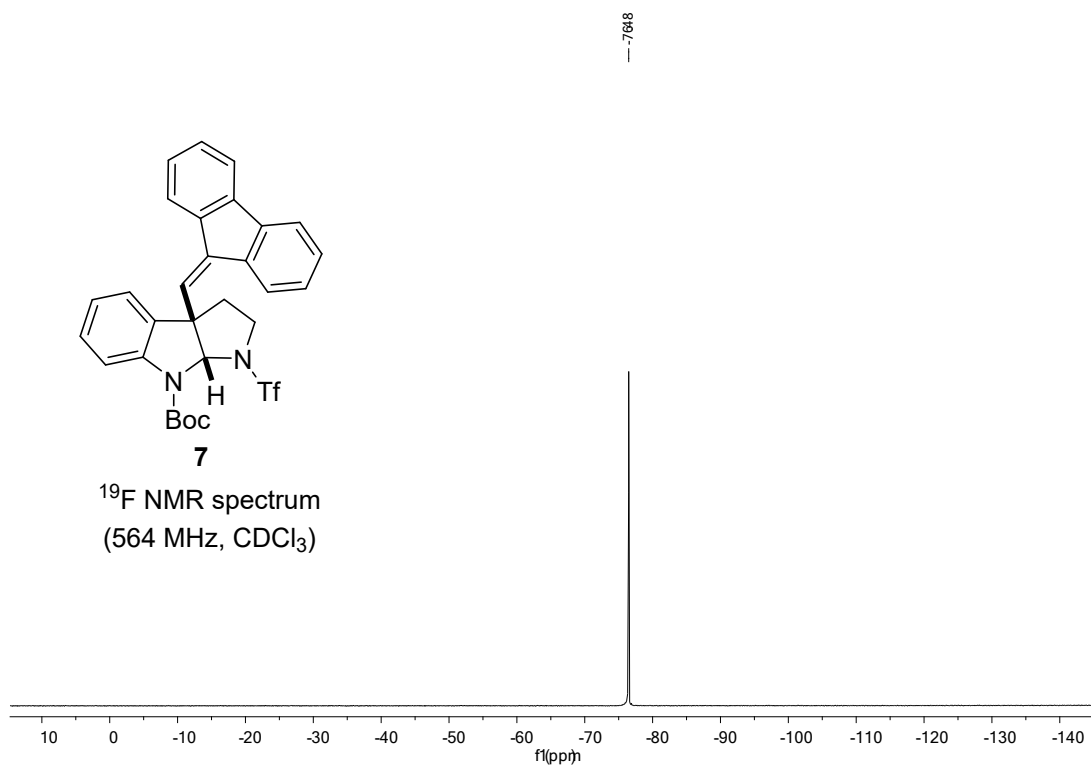

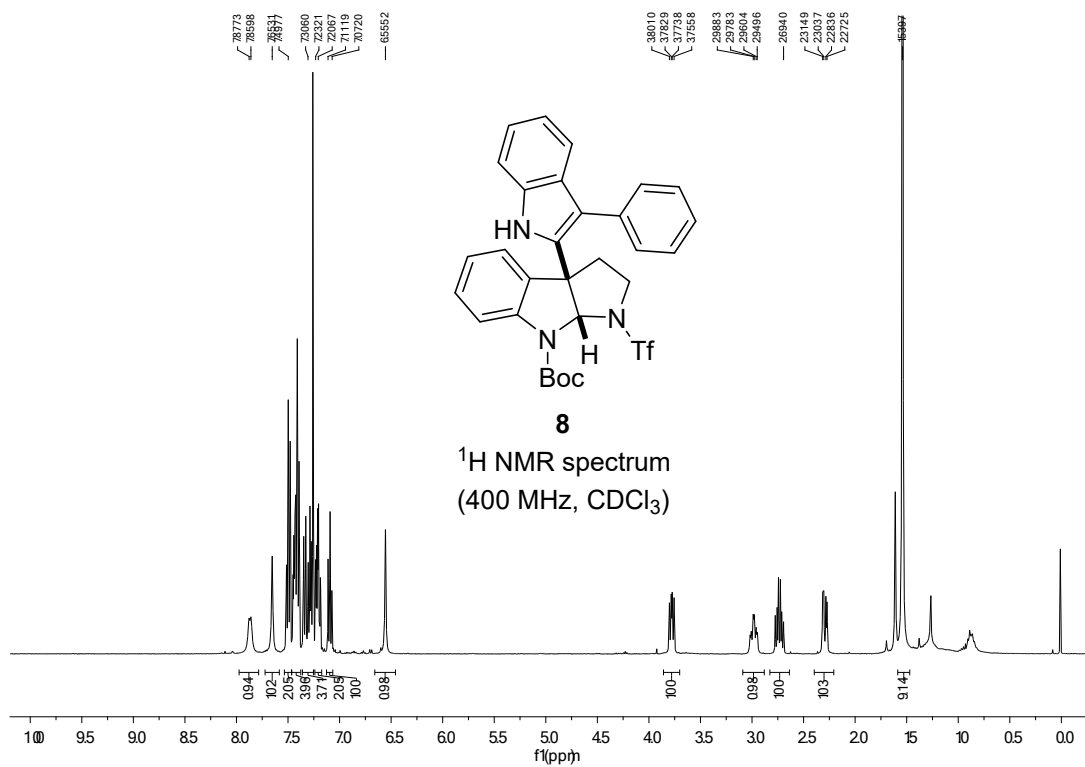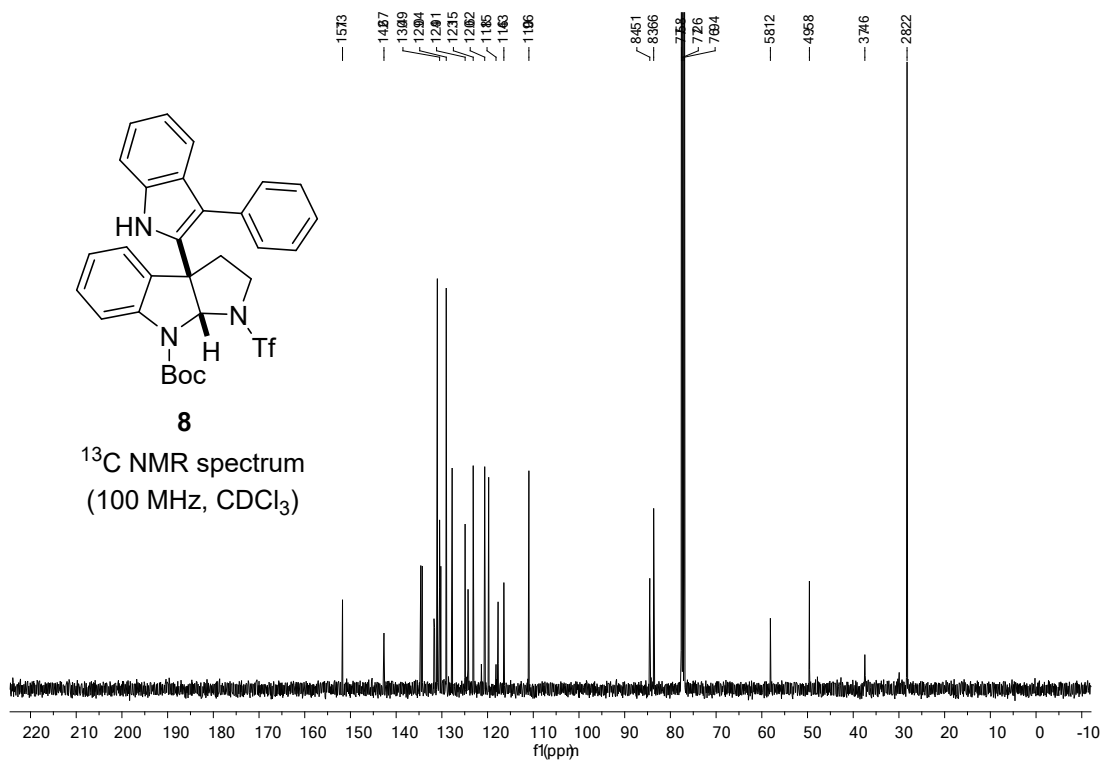

Supplement: d2cc05905c1.pdf [file d2cc05905c1.pdf]
